# Supplementary material for: Identification of aging change and senescence markers using African turquoise killifish
Source: Research Square preprint supplement (doi:10.21203/rs.3.rs-8655648/v1), 2026-02-13
Supplement: Supplementary file 1 [file 178ca3168dd8c615a8c03716.xlsx]

## Sheet: S1
Supplementary Table 1: Raw data of the metabolomic analysis.
HMT DB				m/z	MT/RT	Relative Area
Compound name	Pathway Label	PubChem CID	HMDB ID			Young			Adult			Old			Young		Adult		Old
						Young-1	Young-2	Young-3	Middle-1	Middle-2	Middle-3	Old-1	Old-2	Old-3	Mean	S.D.	Mean	S.D.	Mean	S.D.
1-Aminocyclopentanecarboxylic acid	1-Aminocyclopentanecarboxylic acid	2901		130.086	7.38187	0.000104761	N.D.	N.D.	0.000310939	0.000191205	N.D.	0.000248692	0.000224318	0.000240188	0.000104761	N.A.	0.000251072	8.46648e-05	0.000237732	1.23712e-05
1-Methyl-4-imidazoleacetic acid	1-Methyl-4-imidazoleacetic acid	75810	HMDB0002820	141.066	6.37793	0.000370386	N.D.	0.000285696	0.000289144	0.000223456	0.000392119	0.000388641	0.000572788	0.000993948	0.000328041	5.98849e-05	0.000301573	8.50156e-05	0.000651793	0.000310291
1-Methylhistidine 3-Methylhistidine	1-Methylhistidine 3-Methylhistidine	92105 64969	HMDB0000001 HMDB0000479	170.092	5.8287	0.00160234	0.00120677	0.00115642	0.00298976	0.0038969	0.00335487	0.00446229	0.00426245	0.00441321	0.00132184	0.000244214	0.00341384	0.000456433	0.00437932	0.000104141
10-Hydroxy-2-decenoic acid	10-Hydroxy-2-decenoic acid	5312738	HMDB0244269	169.122	8.62218	0.00116352	0.00161018	N.D.	N.D.	N.D.	0.00180239	0.000842009	0.000838383	0.00107109	0.00138685	0.000315837	0.00180239	N.A.	0.000917159	0.000133316
10-Hydroxyoctadecanoic acid	10-Hydroxyoctadecanoic acid	9561835	HMDB0037396	299.258	13.2377	N.D.	N.D.	N.D.	7.56703e-05	N.D.	0.000218211	7.62102e-05	N.D.	N.D.	N.A.	N.A.	0.000146941	0.000100792	7.62102e-05	N.A.
1H-Imidazole-4-propionic acid	1H-Imidazole-4-propionic acid	10105257		141.066	6.27361	0.000594221	0.00113597	0.000889817	0.0013692	0.000875396	0.000967855	0.000531164	0.000909475	0.000441321	0.000873336	0.000271251	0.00107082	0.000262508	0.00062732	0.000248448
2,3-Diaminopropionic acid	2,3-Diaminopropionic acid	364	HMDB0002006	105.066	5.58707	0.000243298	0.000197369	0.000260468	0.000318688	0.000324818	0.000227335	0.000128689	0.000273137	0.000328062	0.000233712	3.26232e-05	0.000290281	5.45985e-05	0.000243296	0.000102982
2,3-Diphosphoglyceric acid	Diphosphoglyceric acid	186004	HMDB0001294	264.952	14.4332	0.000236051	N.D.	0.000289938	0.000328462	0.000319825	N.D.	N.D.	N.D.	N.D.	0.000262995	3.81037e-05	0.000324143	6.10718e-06	N.A.	N.A.
2-Amino-2-(hydroxymethyl)-1,3-propanediol	2-Amino-2-(hydroxymethyl)-1,3-propanediol	6503		122.081	6.40945	0.000168305	0.000309525	0.000370246	0.00137937	0.00014421	0.000259619	N.D.	0.000147721	N.D.	0.000282692	0.00010361	0.000594399	0.000682248	0.000147721	N.A.
2-Amino-2-methyl-1-propanol	2-Amino-2-methyl-1-propanol	11807	HMDB0244974	90.0911	5.97856	N.D.	N.D.	N.D.	N.D.	0.000114262	N.D.	N.D.	N.D.	N.D.	N.A.	N.A.	0.000114262	N.A.	N.A.	N.A.
2-Aminoethylphosphonic acid	2-Aminoethylphosphonic acid	339	HMDB0011747	124.017	6.79715	0.000221455	0.000252344	0.000280151	0.00067383	0.000524261	0.000513945	0.000476192	0.000381854	0.000318966	0.000251317	2.93618e-05	0.000570679	8.94805e-05	0.000392337	7.91357e-05
2-Aminoisobutyric acid 2-Aminobutyric acid	2-Aminoisobutyric acid 2-Aminobutyric acid	6119 6657	HMDB0001906 HMDB0000452	104.07	7.39059	0.011593	0.0111442	0.0133745	0.0263301	0.02646	0.0250311	0.0273468	0.0275738	0.0314814	0.0120372	0.00117967	0.0259404	0.000790165	0.0288007	0.00232438
2-Arachidonoylglycerol	2-Arachidonoylglycerol	5282280	HMDB0004666	379.285	13.4268	0.0139003	0.0122192	0.00783468	0.0282615	0.0210942	0.0179192	0.0289208	0.0164999	0.0189548	0.0113181	0.00313161	0.0224249	0.00529801	0.0214585	0.00657811
2-Hydroxyadipic acid 3-Hydroxy-3-methylglutaric acid	2-Hydroxyadipic acid 3-Hydroxy-3-methylglutaric acid	193530 1662	HMDB0000321 HMDB0000355	161.045	12.5776	N.D.	N.D.	N.D.	N.D.	N.D.	N.D.	0.000105379	N.D.	0.000173059	N.A.	N.A.	N.A.	N.A.	0.000139219	4.7857e-05
2-Hydroxybutyric acid	2-Hydroxybutyric acid	440864	HMDB0000008	103.04	8.39184	0.00058429	0.000439281	0.000362117	0.000848929	0.000253684	0.00106351	0.000877824	0.000410689	0.000437975	0.000461896	0.0001128	0.000722042	0.000419561	0.000575496	0.000262179
2-Hydroxyhexadecanoic acid	2-Hydroxyhexadecanoic acid	92836	HMDB0031057	271.228	13.7547	N.D.	0.000160614	0.000138201	0.000106929	N.D.	0.00042927	9.82982e-05	N.D.	5.99152e-05	0.000149408	1.58482e-05	0.0002681	0.00022793	7.91067e-05	2.71409e-05
2-Hydroxyisobutyric acid	2-Hydroxyisobutyric acid	11671	HMDB0000729	103.04	8.48141	0.00037201	N.D.	0.000395963	0.000670509	0.000927693	0.000874532	0.000675815	0.000786384	0.000666098	0.000383987	1.69373e-05	0.000824244	0.000135766	0.000709432	6.68186e-05
2-Hydroxyoctadecanoic acid	2-Hydroxyoctadecanoic acid	69417	HMDB0242145	299.26	14.4667	0.000241505	0.000460994	0.000318723	0.000307464	0.000267769	0.00113921	0.000369942	0.00017768	0.000154067	0.000340408	0.00011134	0.000571481	0.000492069	0.000233896	0.000118409
2-Methylserine	2-Methylserine	439656		120.065	7.98178	0.000488887	0.000381581	0.000726173	0.00115706	0.00106568	0.000882436	0.00110222	0.000868231	0.00130014	0.000532214	0.000176334	0.00103506	0.00013985	0.0010902	0.000216205
2-Methylthiazolidine-4-carboxylic acid	2-Methylthiazolidine-4-carboxylic acid	160736	HMDB0246657	148.043	10.8101	0.000548996	0.000234964	0.000355245	0.000472705	0.000172315	0.000500406	0.000692347	0.000408653	0.00027729	0.000379735	0.000158442	0.000381809	0.000181955	0.00045943	0.000212136
2-Oxoglutaric acid	2-Oxoglutaric acid	51	HMDB0000208	145.014	15.8191	N.D.	0.000676433	0.0014187	N.D.	N.D.	N.D.	0.000406404	N.D.	0.000124592	0.00104757	0.000524861	N.A.	N.A.	0.000265498	0.000199271
3',5'-ADP	3',5'-ADP	159296	HMDB0000061	426.022	11.0292	0.000317377	N.D.	0.0002251	0.000326349	0.000277449	0.000340603	0.000273984	0.00029003	0.000321757	0.000271238	6.52497e-05	0.0003148	3.31229e-05	0.000295257	2.43116e-05
3'-AMP	3'-AMP	41211	HMDB0003540	346.056	8.34006	0.000268582	0.000182295	0.00024712	0.000147627	0.000302645	0.000368407	0.000180337	0.000145295	0.000288769	0.000232666	4.49226e-05	0.000272893	0.000113357	0.0002048	7.48004e-05
3-Aminobutyric acid	3-Aminobutyric acid	10932		104.07	6.15643	0.00234883	0.00201254	0.00220307	0.00545403	0.00379093	0.00397433	0.00481104	0.00556796	0.00591878	0.00218815	0.000168641	0.00440643	0.000911871	0.00543259	0.000566138
3-Aminoisobutyric acid	3-Aminoisobutyric acid	64956	HMDB0003911	104.07	6.07417	0.0204995	0.0402916	0.0400452	0.011575	0.0045645	0.0244836	0.00390668	0.00645891	0.00381137	0.0336121	0.0113565	0.013541	0.010104	0.00472566	0.0015018
3-Aminopropane-1,2-diol	3-Aminopropane-1,2-diol	440902		92.0711	5.76488	0.000248451	N.D.	N.D.	0.000299315	N.D.	N.D.	0.00016987	N.D.	0.000165202	0.000248451	N.A.	0.000299315	N.A.	0.000167536	3.30018e-06
3-Guanidinopropionic acid	3-Guanidinopropionic acid	67701		132.077	6.20337	N.D.	N.D.	N.D.	9.97717e-05	N.D.	N.D.	N.D.	N.D.	N.D.	N.A.	N.A.	9.97717e-05	N.A.	N.A.	N.A.
3-Hydroxybutyric acid	3-HBA	441	HMDB0000011,HMDB0000357,HMDB0000442	103.04	8.19449	0.00133832	0.000822438	0.000769906	0.00105875	0.000496201	0.00194326	0.000962127	0.000894165	0.000509533	0.000976888	0.000314109	0.00116607	0.000729474	0.000788608	0.000244063
3-Hydroxydodecanoic acid	3-Hydroxydodecanoic acid	94216	HMDB0000387	215.165	11.5155	N.D.	N.D.	N.D.	N.D.	N.D.	0.000285121	N.D.	N.D.	N.D.	N.A.	N.A.	0.000285121	N.A.	N.A.	N.A.
3-Hydroxyhexadecanoic acid	3-Hydroxyhexadecanoic acid	301590	HMDB0061658	271.228	13.4088	0.000174456	0.000593088	0.0002973	0.000186357	0.000138616	0.00110504	0.000179675	0.000109409	N.D.	0.000354948	0.000215188	0.000476672	0.000544708	0.000144542	4.96859e-05
3-Hydroxyisovalerylcarnitine	3-Hydroxyisovalerylcarnitine	57357187	HMDB0061189	262.165	7.70627	N.D.	N.D.	0.000534572	0.000526465	0.000466725	N.D.	0.000474541	0.000449056	0.000437806	0.000534572	N.A.	0.000496595	4.22432e-05	0.000453801	1.88216e-05
3-Hydroxypropionic acid	b-Lactate	68152	HMDB0000700	89.0242	8.91242	0.000841611	0.000710192	0.000962791	0.000735416	0.00066227	0.00103354	0.000643009	0.000934478	0.00061078	0.000838198	0.000126334	0.000810408	0.000196667	0.000729422	0.000178313
3-Phenylpropionic acid	3-Phenylpropionic acid	107	HMDB0000764	149.06	7.59752	0.000318211	0.000241794	0.000230401	0.00013374	0.000127415	0.000211139	0.000130033	0.000222841	0.000198941	0.000263469	4.7749e-05	0.000157431	4.66197e-05	0.000183939	4.81887e-05
3-Phosphoglyceric acid	3-PG	439183	HMDB0000807	184.986	14.9967	0.000615152	N.D.	0.000512999	0.000355632	0.000203577	0.000294117	0.000124466	N.D.	0.000204778	0.000564075	7.22329e-05	0.000284442	7.6488e-05	0.000164622	5.67888e-05
3-Ureidopropionic acid	3-Ureidopropionic acid	111	HMDB0000026	131.046	7.92857	0.000170991	0.000124062	N.D.	N.D.	N.D.	N.D.	N.D.	N.D.	N.D.	0.000147527	3.31841e-05	N.A.	N.A.	N.A.	N.A.
4-Acetamido-2-aminobutyric acid	4-Acetamido-2-aminobutyric acid	441021	HMDB0031411	161.092	8.44758	0.000421908	N.D.	0.00040502	0.000916834	0.00102191	0.000698147	0.000555937	0.000595094	0.000743216	0.000413464	1.19415e-05	0.000878964	0.00016517	0.000631415	9.87815e-05
4-Amino-3-hydroxybutyric acid	4-Amino-3-hydroxybutyric acid	2149		120.065	6.28108	0.000396147	0.000733713	0.000546164	0.000575867	0.000445991	0.000318134	0.000402153	0.000476412	0.000365164	0.000558675	0.00016913	0.000446664	0.000128868	0.000414576	5.66549e-05
4-Androstene-3,17-dione	4-Androstene-3,17-dione	6128	HMDB0000053	287.205	9.77728	0.0014559	0.00113394	0.00085747	0.00135819	0.000778063	0.0014467	0.000778093	0.000799761	0.000851959	0.0011491	0.000299504	0.00119432	0.000363193	0.000809938	3.797e-05
4-Guanidinobutyric acid	4-GBA	500	HMDB0003464	146.092	6.417	0.000645743	0.000617798	0.000514117	0.00054148	0.000308232	0.00127523	0.000609986	0.000494509	0.000502247	0.000592552	6.93495e-05	0.000708313	0.000504624	0.000535581	6.45534e-05
4-Hydroxy-3-methoxyphenylglycol sulfate	4-Hydroxy-3-methoxyphenylglycol sulfate	3035420	HMDB0003332	263.023	6.95623	N.D.	N.D.	N.D.	N.D.	0.000125983	N.D.	0.000126057	0.000135776	0.000139563	N.A.	N.A.	0.000125983	N.A.	0.000133799	6.96713e-06
4-Methylaminobutyric acid 5-Aminovaleric acid	4-Methylaminobutyric acid 5-Aminovaleric acid	70703 138	HMDB0003355	118.086	6.22623	0.0115902	0.00821433	0.0233153	0.0128827	0.0145887	0.030888	0.0243953	0.0204302	0.00940443	0.0143733	0.00792583	0.0194531	0.00993954	0.0180766	0.0077676
4-Oxopyrrolidine-2-carboxylic acid	4-Oxopyrrolidine-2-carboxylic acid	107541		130.05	8.41839	0.00344224	0.003245	0.00380269	0.00292486	0.00257919	0.00454737	0.00267931	0.00331721	0.002744	0.00349665	0.000282796	0.00335048	0.00105085	0.0029135	0.000351109
4-Pyridoxic acid	4-Pyridoxic acid	6723	HMDB0000017	182.046	7.56902	N.D.	N.D.	N.D.	N.D.	N.D.	N.D.	0.000105975	N.D.	N.D.	N.A.	N.A.	N.A.	N.A.	0.000105975	N.A.
5-Amino-3,4-dihydro-2H-pyrrole-2-carboxylic acid	5-Amino-3,4-dihydro-2H-pyrrole-2-carboxylic acid	13894665		129.066	6.75932	0.000226124	0.000146617	N.D.	0.000548745	0.000449217	0.000498388	0.00141558	0.00131602	0.000639329	0.000186371	5.622e-05	0.000498783	4.97651e-05	0.00112364	0.000422373
5-Hydroxylysine	5-Hydroxylysine	3032849	HMDB0000450	163.109	5.55301	N.D.	N.D.	N.D.	N.D.	N.D.	N.D.	N.D.	0.000146459	6.44407e-05	N.A.	N.A.	N.A.	N.A.	0.00010545	5.79955e-05
5-Oxoproline	5-Oxoproline	7405	HMDB0000267	128.035	8.13158	0.000516728	0.000364168	0.000539505	0.000384614	0.000333569	0.000672516	0.000446766	0.000515671	0.000405495	0.000473467	9.53381e-05	0.000463566	0.000182747	0.000455977	5.56623e-05
6-Phosphogluconic acid	6-PG	91493	HMDB0001316	275.017	12.011	0.00120987	0.000768847	0.0011781	0.00160789	0.00138724	0.0016965	0.00134348	0.00148906	0.00156565	0.00105227	0.000245967	0.00156388	0.000159255	0.00146606	0.000112856
9(S)-HODE	9(S)-HODE	5312830	HMDB0004670	279.233	12.34	0.000942311	0.00111333	0.000534321	0.000846963	0.0005965	0.000506158	0.000687545	0.000286384	0.000403747	0.000863321	0.000297477	0.000649874	0.00017656	0.000459225	0.000206254
Abietic acid	Abietic acid	10569	HMDB0247751	303.234	13.7406	N.D.	N.D.	N.D.	0.000291125	0.000276174	0.00024404	0.000589007	0.000401885	0.000396988	N.A.	N.A.	0.000270447	2.40592e-05	0.000462627	0.000109476
Acetyl CoA_divalent	Acetyl-CoA	444493		403.555	8.73848	0.000299443	0.000154445	0.000144357	0.000685906	0.000519966	0.00020636	0.000330253	0.000478717	0.000497861	0.000199415	8.67737e-05	0.000470744	0.000243533	0.00043561	9.1743e-05
Acylcarnitine(16:1)	AC(16:1)			398.327	10.9507	0.000473072	0.000472807	0.000613435	N.D.	N.D.	N.D.	0.000347101	N.D.	0.000412996	0.000519771	8.1115e-05	N.A.	N.A.	0.000380048	4.65943e-05
Acylcarnitine(17:0)	AC(17:0)			414.358	11.7447	0.00104525	0.000728673	0.000648123	N.D.	0.000904211	N.D.	0.000743471	0.000971009	0.000851248	0.000807348	0.000209927	0.000904211	N.A.	0.000855243	0.000113821
Acylcarnitine(18:0)	AC(18:0)			428.374	12.2461	0.00208009	0.00176816	0.00176119	0.00114631	0.00211343	0.000702347	0.0019277	0.0021078	0.00164807	0.00186982	0.00018214	0.00132069	0.000721524	0.00189452	0.000231654
Acylcarnitine(18:1)	AC(18:1)			426.359	11.6694	0.00390887	0.00318429	0.00488618	0.000989004	0.00256981	0.000810278	0.00219224	0.00225427	0.00210909	0.00399311	0.000854064	0.00145637	0.000968407	0.0021852	7.2847e-05
Acylcarnitine(18:2)	AC(18:2)			424.342	11.2049	0.00096257	0.000759583	0.00112159	N.D.	0.000701022	N.D.	0.00061919	0.000545441	0.00072212	0.000947914	0.000181447	0.000701022	N.A.	0.000628917	8.87402e-05
Acylcarnitine(20:0)	AC(20:0)			456.405	12.9624	0.000928075	0.00100858	0.00114471	0.000477187	0.00107992	0.000533274	0.00107504	0.00111857	0.00120092	0.00102712	0.000109503	0.000696793	0.000332978	0.00113151	6.3933e-05
Adenine	Adenine	190	HMDB0000034	136.062	5.91965	0.00253145	0.00272746	0.00206124	0.00117837	0.000722432	0.00204736	0.00124893	0.00126552	0.00101933	0.00244005	0.000342384	0.00131605	0.000673109	0.00117793	0.000137596
Adenosine	Adenosine	60961	HMDB0000050	268.104	7.59422	0.0139934	0.012037	0.00928683	0.0195136	0.0164238	0.0358436	0.0294885	0.0450786	0.036382	0.0117724	0.00236441	0.023927	0.0104351	0.036983	0.00781241
Adenylosuccinic acid	Adenylosuccinic acid	447145	HMDB0000536	462.067	11.3371	0.00141339	0.00117817	0.00139015	0.00241244	0.00168903	0.00325223	0.00208093	0.00302544	0.00187472	0.00132724	0.00012962	0.00245124	0.000782322	0.00232703	0.000613564
ADMA	ADMA	123831	HMDB0001539	203.15	5.9321	0.00136705	0.000585843	0.00102687	0.00347118	0.00441338	0.00382299	0.00383815	0.0050221	0.00389144	0.000993254	0.000391688	0.00390252	0.000476105	0.00425056	0.000668704
ADP	ADP	6022	HMDB0001341	426.022	9.18753	0.00810833	0.00504392	0.0128784	0.00490549	0.00639392	0.00322008	0.00354709	0.00262342	0.00233401	0.00867688	0.00394806	0.00483983	0.00158794	0.00283484	0.00063357
ADP-ribose	ADP-ribose	445794	HMDB0001178	558.065	7.33161	0.000243558	N.D.	N.D.	0.000397596	0.000684603	N.D.	6.14378e-05	6.66284e-05	N.D.	0.000243558	N.A.	0.000541099	0.000202945	6.40331e-05	3.67036e-06
Adrenic acid	Adrenic acid	5497181	HMDB0002226	331.265	14.5087	0.000447579	0.000269191	0.000210726	0.000166031	0.000210456	0.000273678	0.00029412	0.000185667	0.000261268	0.000309166	0.000123383	0.000216722	5.40965e-05	0.000247018	5.5613e-05
Agmatine	Agmatine	199	HMDB0001432	131.129	4.04623	N.D.	N.D.	N.D.	N.D.	N.D.	0.000508477	N.D.	N.D.	N.D.	N.A.	N.A.	0.000508477	N.A.	N.A.	N.A.
Ala	Ala	602	HMDB0000161,HMDB0001310	90.0548	6.97846	0.180602	0.265424	0.288392	0.145071	0.0924714	0.241115	0.101158	0.168512	0.154474	0.244806	0.0567753	0.159553	0.0753725	0.141381	0.0355343
Ala-Ala	Ala-Ala	5460362	HMDB0003459	161.092	7.1212	0.000184907	N.D.	N.D.	0.000396181	0.00026308	0.000283832	0.000220702	0.000301756	0.000392893	0.000184907	N.A.	0.000314364	7.1611e-05	0.000305117	8.61447e-05
Ala-Hyp	Ala-Hyp	25227058	HMDB0028688	203.102	7.52735	N.D.	N.D.	N.D.	0.000217948	0.000202263	N.D.	0.000209763	0.000300914	0.000153095	N.A.	N.A.	0.000210105	1.10912e-05	0.000221257	7.45765e-05
Allantoic acid	Allantoic acid	203	HMDB0001209	175.048	7.49516	0.000330305	0.000149381	0.00023978	0.000205591	8.21753e-05	0.000273264	0.000150115	0.000167971	0.00018194	0.000239822	9.04622e-05	0.00018701	9.68899e-05	0.000166675	1.59521e-05
AMP	AMP	6083	HMDB0000045	346.056	7.96384	0.0297863	0.0332343	0.0396098	0.0483361	0.0639364	0.0352272	0.0383612	0.0420126	0.05392	0.0342101	0.00498394	0.0491665	0.0143726	0.0447646	0.00813626
Arabinonic acid-1	Arabinonic acid	6602426	HMDB0000539	165.04	7.36191	N.D.	N.D.	0.000150882	N.D.	N.D.	N.D.	8.45018e-05	0.000103302	N.D.	0.000150882	N.A.	N.A.	N.A.	9.39019e-05	1.32938e-05
Arabinonic acid-2	Arabinonic acid	6602426	HMDB0000539	165.04	7.4298	0.000350324	0.000274287	0.000349475	0.000371633	0.000351893	0.000463984	0.00015429	0.000132977	0.000180417	0.000324695	4.36571e-05	0.000395837	5.98369e-05	0.000155895	2.37609e-05
Arachidic acid	Arachidic acid	10467	HMDB0002212	311.296	15.6637	N.D.	9.64018e-05	6.86616e-05	0.000102146	7.98374e-05	8.12133e-05	7.95686e-05	6.84898e-05	8.78894e-05	8.25317e-05	1.96153e-05	8.77323e-05	1.25018e-05	7.86493e-05	9.73243e-06
Arachidonic acid	Arachidonic acid	444899	HMDB0001043	303.233	14.0307	0.00412275	0.00242806	0.00117076	0.00218931	0.00174163	0.00167401	0.00172119	0.000893541	0.001527	0.00257386	0.00148138	0.00186832	0.000280039	0.00138058	0.000432816
Arg	Arg	6322	HMDB0000517,HMDB0003416	175.119	5.53104	0.0303608	0.0303529	0.0367239	0.0262448	0.0212597	0.0339906	0.0194887	0.0298586	0.0220989	0.0324792	0.00367601	0.027165	0.00641515	0.0238154	0.00539388
Argininosuccinic acid	Argininosuccinic acid	16950	HMDB0000052	291.13	7.26939	0.0033329	0.00110276	0.00171963	0.00130527	0.000449677	0.00226461	0.00118072	0.00129961	0.000919353	0.00205177	0.00115157	0.00133985	0.000907958	0.00113323	0.000194527
Ascorbate 2-sulfate	Ascorbate 2-sulfate	54676864		254.981	11.7708	N.D.	0.000126172	0.000150882	0.000218572	0.000239654	0.000236336	0.000267622	0.000241318	0.000281664	0.000138527	1.74727e-05	0.000231521	1.1336e-05	0.000263535	2.04813e-05
Ascorbic acid	Ascorbic acid	54670067	HMDB0000044	175.025	7.32497	0.00678419	0.00534479	0.00621838	0.00712925	0.00698604	0.00427665	0.00498282	0.00671939	0.00836696	0.00611579	0.00072516	0.00613065	0.00160721	0.00668972	0.00169226
Asn	Asn	236	HMDB0000168,HMDB0033780	133.061	8.10309	0.027155	0.0232702	0.0357325	0.0215124	0.0154747	0.0338252	0.00740863	0.00613654	0.00908028	0.0287192	0.00637671	0.0236041	0.00935233	0.00754181	0.00147638
Asp	Asp	424	HMDB0000191,HMDB0006483	134.045	8.90417	0.175942	0.0967041	0.144489	0.0983488	0.132609	0.159033	0.0450788	0.110069	0.0783169	0.139045	0.0398985	0.129997	0.0304263	0.0778215	0.0324978
ATP	ATP	5957	HMDB0000538	505.989	9.86363	0.00332557	0.00113175	0.00674647	0.00107505	0.00120428	0.000531323	0.00075813	0.000391652	0.000286486	0.0037346	0.00282962	0.000936885	0.000357122	0.000478756	0.000247593
Atropine	Atropine	174174	HMDB0014712	290.175	7.60331	N.D.	0.000390353	N.D.	N.D.	N.D.	N.D.	N.D.	N.D.	N.D.	0.000390353	N.A.	N.A.	N.A.	N.A.	N.A.
Behenic acid	Behenic acid	8215	HMDB0000944	339.326	16.131	9.66021e-05	N.D.	8.37637e-05	N.D.	9.09001e-05	6.75453e-05	6.3939e-05	7.33038e-05	9.33173e-05	9.01829e-05	9.0781e-06	7.92227e-05	1.65143e-05	7.68534e-05	1.50073e-05
Betaine	Glycine betaine	247	HMDB0000043	118.086	8.63618	0.326274	0.250777	0.207391	0.274537	0.155478	0.356293	0.187977	0.203535	0.232657	0.261481	0.0601601	0.262103	0.100983	0.208056	0.0226809
Betaine aldehyde_+H2O	Betaine aldehyde	249		120.102	5.78385	0.00727033	0.00817109	0.00570233	0.0174169	0.0142307	0.0203472	0.0153172	0.0139674	0.0213459	0.00704792	0.00124932	0.0173316	0.00305911	0.0168768	0.00392869
Biotin	Biotin	171548	HMDB0000030	243.083	6.61835	0.000621408	0.000359527	0.000497911	0.000491485	0.000503359	0.00043227	0.000565267	0.000591257	0.000500652	0.000492948	0.000131011	0.000475705	3.80814e-05	0.000552392	4.66546e-05
Butyrylcarnitine-2	Butyrylcarnitine	439829	HMDB0002013	232.154	7.36141	0.000627424	N.D.	0.00041593	0.000919256	0.000543207	0.000692766	0.000759266	0.000811415	0.000278852	0.000521677	0.000149549	0.00071841	0.000189332	0.000616511	0.000293581
Campesterol	Campesterol	173183	HMDB0002869	383.368	16.1525	0.00264077	0.00282139	0.0037153	0.00820316	0.00589517	0.00598564	0.00807033	0.00752577	0.00565779	0.00305915	0.000575369	0.00669465	0.00130719	0.00708463	0.00126532
Carnitine	Carnitine	85	HMDB0000062	162.112	6.58288	0.0241312	0.0190201	0.020581	0.0193664	0.0184386	0.0299248	0.0208756	0.026246	0.0189702	0.0212441	0.00261925	0.0225766	0.00638063	0.0220306	0.00377292
CDP-choline	CDP-choline	13804	HMDB0001413	487.1	5.93401	0.000313206	0.00020255	0.000316852	0.000336311	0.000226197	0.000322356	0.000152103	0.000326703	0.000272022	0.000277536	6.49654e-05	0.000294955	5.99535e-05	0.000250276	8.93082e-05
CDP-ethanolamine	CDP-ethanolamine	123727	HMDB0001564	447.066	16.0942	0.000406452	N.D.	0.000536618	N.D.	0.000345091	N.D.	0.000365799	0.000444426	0.000276509	0.000471535	9.20414e-05	0.000345091	N.A.	0.000362245	8.40151e-05
Cholesterol sulfate	Cholesterol sulfate	65076	HMDB0000653	465.305	16.481	0.00107835	0.000990704	0.00099533	0.00137778	0.00123888	0.001729	0.00122117	0.00117571	0.00107868	0.00102146	4.93226e-05	0.00144855	0.00025261	0.00115852	7.2783e-05
Cholesterol Lathosterol	Cholesterol Lathosterol	5997 65728	HMDB0000067 HMDB0001170	369.352	15.9969	0.191737	0.210587	0.24492	0.310878	0.273914	0.215032	0.237139	0.205087	0.214563	0.215748	0.0269647	0.266608	0.0483392	0.21893	0.0164657
Cholic acid	Cholic acid	221493	HMDB0000619	407.279	10.8521	0.000148399	0.0001411	N.D.	0.000205488	N.D.	9.63117e-05	N.D.	8.2713e-05	0.000138515	0.000144749	5.16065e-06	0.0001509	7.71995e-05	0.000110614	3.94577e-05
Choline	Choline	305	HMDB0000097	104.107	5.34432	0.138641	0.140881	0.161804	0.157578	0.124915	0.182533	0.127409	0.0978912	0.11269	0.147109	0.0127754	0.155009	0.0288947	0.112663	0.0147589
cis-11-Eicosenoic acid	cis-11-Eicosenoic acid	5282768	HMDB0002231	309.28	15.1435	0.000331752	0.000189635	0.000191761	0.000260661	0.000207124	0.000201523	0.000181742	0.000178774	0.000197803	0.000237716	8.14445e-05	0.000223103	3.26466e-05	0.000186106	1.02381e-05
cis-4,7,10,13,16,19-Docosahexaenoic acid	DHA	445580	HMDB0002183	327.234	13.9307	0.0195017	0.00590019	0.00228392	0.00366907	0.00323415	0.00287711	0.00275558	0.00188467	0.00278762	0.0092286	0.00907864	0.00326011	0.000396615	0.00247596	0.000512317
cis-5,8,11,14,17-Eicosapentaenoic acid	EPA	446284	HMDB0001999	301.218	13.6257	0.00438157	0.00261302	0.00170618	0.00101976	0.00111546	0.000882539	0.000636936	0.000498247	0.000657083	0.00290026	0.00136063	0.00100592	0.000117074	0.000597422	8.64768e-05
cis-8,11,14-Eicosatrienoic acid	cis-8,11,14-Eicosatrienoic acid	5280581	HMDB0002925	305.249	14.3234	0.000892616	0.00064696	0.00059776	0.000705117	0.000589517	0.000806412	0.00072658	0.000652295	0.000600821	0.000712445	0.00015796	0.000700349	0.000108526	0.000659899	6.32231e-05
cis-Aconitic acid	cis-Aconitic acid	643757	HMDB0000072	173.01	18.5839	N.D.	0.000241372	0.000370273	N.D.	N.D.	N.D.	0.000359878	N.D.	N.D.	0.000305822	9.11463e-05	N.A.	N.A.	0.000359878	N.A.
Citric acid	Citric acid	311	HMDB0000094	191.019	18.0325	0.00245852	0.00385731	0.00489225	0.0032173	0.00322545	0.00707185	0.00497308	0.00281239	0.0016603	0.00373603	0.00122139	0.00450486	0.00222308	0.00314859	0.00168178
Citrulline	Citrulline	9750	HMDB0000904	176.103	8.48722	0.00619009	0.00293548	0.00349927	0.00291905	0.0011933	0.0055085	0.00386807	0.00430707	0.00344816	0.00420828	0.00173929	0.00320695	0.00217196	0.00387443	0.000429487
CMP	CMP	6131	HMDB0000095	322.044	8.20928	0.000871222	0.0005414	0.000716078	0.00119007	0.00149347	0.00103962	0.000836468	0.001138	0.00148496	0.000709566	0.000165007	0.00124105	0.000231181	0.00115314	0.000324509
CMP-N-acetylneuraminate	CMP-NeuNAc	448209	HMDB0001176	613.14	7.07831	0.000311121	0.000300027	0.000531757	0.000504769	0.000610731	0.000290207	0.000289095	0.000270153	0.000391031	0.000380968	0.000130705	0.000468569	0.000163299	0.00031676	6.50145e-05
CoA_divalent	CoA	87642		382.55	9.01111	0.000597636	0.000441813	0.000628811	0.000504467	0.000466423	0.000733338	0.000456906	0.000439804	0.000637932	0.000556086	0.000100184	0.000568076	0.00014438	0.000511547	0.000109786
Creatine	Creatine	586	HMDB0000064	132.077	6.82993	0.0530499	0.0443455	0.060346	0.0629676	0.0549671	0.0375029	0.212515	0.194329	0.169917	0.0525805	0.00801058	0.0518125	0.0130221	0.192253	0.0213746
Crotonic acid betaine	Crotonic acid betaine	5280649	HMDB0250545	144.102	6.40318	N.D.	N.D.	N.D.	0.000125926	9.62936e-05	0.000113667	0.000154105	N.D.	N.D.	N.A.	N.A.	0.000111962	1.48894e-05	0.000154105	N.A.
Cyclo(-Leu-Pro)	Cyclo(-Leu-Pro)	7074739	HMDB0034276	211.144	6.09937	0.000891938	0.000684025	0.000873293	0.000920918	0.000546942	0.000259459	0.000690652	0.000374194	0.000489121	0.000816419	0.000115034	0.000575773	0.000331671	0.000517989	0.000160192
Cycloartenol Lanosterol	Cycloartenol Lanosterol	92110 246983	HMDB0036591 HMDB0001251	409.385	16.157	0.000684969	0.000517455	0.000828259	N.D.	N.D.	N.D.	0.000204177	N.D.	0.00029952	0.000676894	0.000155559	N.A.	N.A.	0.000251848	6.74173e-05
Cys	Cys	594	HMDB0000574,HMDB0003417	122.027	8.68748	0.000734475	0.000437972	0.000287742	0.000640767	0.000254326	0.000573046	0.000248048	0.000745761	0.00039094	0.00048673	0.000227323	0.000489379	0.000206359	0.000461583	0.000256266
Cystathionine	Cystathionine	834	HMDB0000099	223.075	7.6442	0.0275477	0.0199832	0.02215	0.0242934	0.00318137	0.0514833	0.00710782	0.00366526	0.00368327	0.0232269	0.00389555	0.0263194	0.0242146	0.00481878	0.00198239
Cysteic acid	Cysteic acid	72886	HMDB0002757	167.997	9.2867	0.00012595	N.D.	0.000104802	9.57008e-05	0.000422616	N.D.	5.74612e-05	7.83864e-05	0.000174835	0.000115376	1.49538e-05	0.000259158	0.000231164	0.000103561	6.26056e-05
Cysteine glutathione disulfide	Cysteine glutathione disulfide	10455148	HMDB0000656	427.096	8.92618	N.D.	N.D.	N.D.	0.000149173	N.D.	N.D.	9.68385e-05	N.D.	N.D.	N.A.	N.A.	0.000149173	N.A.	9.68385e-05	N.A.
Cysteinesulfinic acid	Cysteinesulfinic acid	1549098	HMDB0000996	152.002	8.13155	0.000322381	N.D.	0.000123968	0.000403634	0.000316103	0.000632982	0.000163039	0.000496074	0.00039839	0.000223175	0.000140299	0.000450906	0.000163643	0.000352501	0.000171194
Cytidine	Cytidine	6175	HMDB0000089	244.093	7.43679	0.000288523	0.000613412	0.00120279	0.000217948	0.000234975	0.000279797	0.000620603	0.000233156	0.000218708	0.000701574	0.000463464	0.00024424	3.19484e-05	0.000357489	0.000227978
Cytosine	Cytosine	597	HMDB0000630	112.05	5.63921	0.000119073	N.D.	N.D.	N.D.	N.D.	0.000119048	N.D.	N.D.	7.81099e-05	0.000119073	N.A.	0.000119048	N.A.	7.81099e-05	N.A.
dAMP	dAMP	12599	HMDB0000905	330.061	8.05814	N.D.	N.D.	N.D.	N.D.	N.D.	N.D.	N.D.	N.D.	8.24693e-05	N.A.	N.A.	N.A.	N.A.	8.24693e-05	N.A.
Deoxyxylulose 5-phosphate	Deoxyxylulose 5-phosphate	443201	HMDB0001213	213.016	9.69288	N.D.	N.D.	N.D.	N.D.	N.D.	N.D.	N.D.	8.11859e-05	0.000113173	N.A.	N.A.	N.A.	N.A.	9.71796e-05	2.26185e-05
Diethanolamine	Diethanolamine	8113	HMDB0004437	106.086	5.9224	0.000249596	0.000381581	N.D.	N.D.	N.D.	0.000341002	0.000189173	0.000257565	N.D.	0.000315588	9.33277e-05	0.000341002	N.A.	0.000223369	4.83607e-05
Dihydroxyacetone phosphate	DHAP	668	HMDB0001473	168.99	10.6102	0.00502381	0.00672551	0.0085073	0.00631776	0.00539637	0.00769006	0.00799605	0.00584511	0.00489386	0.00675221	0.0017419	0.00646806	0.00115421	0.006245	0.00158929
Dimethylaminoethanol	Dimethylaminoethanol	7902	HMDB0032231	90.0913	5.39409	0.000717874	0.000547622	0.000518208	0.00064222	0.000650558	0.00146355	0.000487732	0.00101216	0.000371413	0.000594568	0.000107794	0.000918777	0.000471808	0.00062377	0.000341351
Docosanedioic acid	Docosanedioic acid	244872	HMDB0242127	369.301	14.0717	N.D.	N.D.	N.D.	N.D.	N.D.	0.000791631	N.D.	N.D.	N.D.	N.A.	N.A.	0.000791631	N.A.	N.A.	N.A.
e-Fructoselysine	e-Fructoselysine	9839580	HMDB0034879	309.166	6.74257	0.000142544	0.000228071	0.000265241	0.000374386	0.000274137	0.000302665	0.00023904	0.000228105	0.000226909	0.000211952	6.29163e-05	0.000317063	5.1652e-05	0.000231352	6.68523e-06
Ectoine	Ectoine	126041		143.081	7.23691	0.000519228	0.000288849	0.000460932	0.000785581	0.000941282	0.000899924	0.000409553	0.000535332	0.00054755	0.000423003	0.000119781	0.000875595	8.06507e-05	0.000497478	7.63903e-05
Ethanolamine	Ethanolamine	700	HMDB0000149	62.0599	4.95488	0.0043164	0.00369425	0.00459773	0.00493822	0.00437698	0.00644811	0.0049111	0.0033837	0.00398868	0.0042028	0.000462328	0.00525444	0.00107116	0.00409449	0.000769176
Ethanolamine phosphate	Ethanolamine phosphate	1015	HMDB0000224	140.012	6.9365	0.00854706	0.00557941	0.00644633	0.00710872	0.00323204	0.00823572	0.00511862	0.00516118	0.00386819	0.0068576	0.00152597	0.00619216	0.00262474	0.004716	0.000734531
Ethyl arachidonate	Ethyl arachidonate	5367369	HMDB0062725	333.28	14.927	0.00210692	0.00231653	0.00160296	0.00067851	0.000882135	0.000841647	0.000905038	0.000393869	N.D.	0.0020088	0.000366761	0.000800764	0.000107793	0.000649453	0.000361451
Ethyl glucuronide	Ethyl glucuronide	18392195	HMDB0010325	221.067	6.74289	0.000208526	0.000504266	0.000570905	0.000585375	0.000452107	0.000984011	0.000529876	0.000236839	9.56644e-05	0.000427899	0.000192882	0.000673831	0.000276765	0.00028746	0.000221487
Ethylmalonic acid	Ethylmalonic acid	11756	HMDB0000622	131.035	13.4434	0.00111603	0.000876873	0.00185096	0.00211417	0.00586107	0.00366756	0.00683649	0.00649543	0.0104508	0.00128129	0.000507633	0.00388093	0.00188254	0.00792756	0.0021918
FAD_divalent	FAD	643975		391.571	6.82058	0.000170991	0.000131658	0.000106841	0.000231855	0.000288902	0.000273264	0.000229447	0.000282751	0.000278619	0.000136497	3.23479e-05	0.000264674	2.94774e-05	0.000263606	2.96543e-05
Fagomine	Fagomine	72259	HMDB0033453	148.096	6.70357	N.D.	0.000399125	0.000458887	N.D.	N.D.	N.D.	N.D.	0.000170868	0.000352666	0.000429006	4.2258e-05	N.A.	N.A.	0.000261767	0.00012855
Fatty acid(14:3)	FA(14:3)			221.155	12.2214	0.00620192	0.00322412	0.00212131	0.00340465	0.00222519	0.00234708	0.00133316	0.00208927	0.0034423	0.00384912	0.00211088	0.00265897	0.000648646	0.00228824	0.00106856
Fatty acid(16:2)	FA(16:2)			251.2	13.4274	0.00030204	0.000144436	N.D.	7.60119e-05	N.D.	N.D.	N.D.	N.D.	N.D.	0.000223238	0.000111443	7.60119e-05	N.A.	N.A.	N.A.
Fatty acid(17:1)	FA(17:1)			267.234	14.2327	0.000512881	0.000327733	0.000239526	0.00025195	0.000253241	0.000271135	0.000196855	N.D.	0.000204901	0.000360046	0.000139513	0.000258775	1.07234e-05	0.000200878	5.68985e-06
Fatty acid(22:5)-1	FA(22:5)			329.249	14.1444	0.00230193	0.00117534	0.000626735	0.000465637	0.000490754	0.00046201	0.000462169	0.00035886	0.000507713	0.001368	0.000854052	0.0004728	1.56535e-05	0.000442914	7.62714e-05
Fatty acid(22:5)-2	FA(22:5)			329.249	14.324	0.000288694	0.000120752	N.D.	0.00012811	N.D.	9.09081e-05	9.92024e-05	5.70019e-05	0.000101042	0.000204723	0.000118753	0.000109509	2.63057e-05	8.57486e-05	2.49123e-05
Flavanone	Flavanone	10251	HMDB0252292	225.092	10.5536	N.D.	N.D.	N.D.	N.D.	0.000231572	0.000487549	N.D.	0.000178899	0.000199561	N.A.	N.A.	0.00035956	0.000181004	0.00018923	1.46105e-05
Formiminoglutamic acid	Formiminoglutamic acid	439233	HMDB0000854	173.056	7.04872	0.000155978	0.000153601	0.000271995	0.00066749	0.00062877	0.000152055	0.000252511	0.000148934	0.000228123	0.000193858	6.76796e-05	0.000482771	0.000287063	0.000209856	5.41507e-05
Fructose 1,6-diphosphate	FBP	172313	HMDB0001058	338.989	11.9357	0.00501088	0.0123383	0.0174566	0.0057502	0.00639564	0.00794247	0.0218118	0.00948112	0.00928807	0.0116019	0.00625547	0.0066961	0.0011266	0.013527	0.00717549
Fructose 6-phosphate	F6P	603	HMDB0000124	259.022	8.52383	0.00626746	0.00581024	0.00839475	0.00488255	0.00599765	0.00400425	0.0071405	0.00707325	0.00671605	0.00682415	0.00137926	0.00496148	0.00099904	0.0069766	0.000228136
Fumaric acid	Fumaric acid	444972	HMDB0000134	115.003	17.6481	0.00550967	0.00334334	0.00452034	0.00492844	0.00269689	0.00805499	0.00431118	0.00413824	0.00174733	0.00445779	0.00108452	0.00522677	0.00269148	0.00339892	0.00143293
GABA	GABA	119	HMDB0000112	104.07	5.96699	0.0120974	0.011886	0.0160924	0.0104044	0.00853465	0.0176877	0.0113732	0.0137797	0.0102461	0.0133586	0.0023699	0.0122089	0.00483602	0.0117997	0.00180503
GDP	GDP	8977	HMDB0001201	442.017	9.00247	0.000572195	0.000361636	0.000580692	0.000655112	0.000708082	0.000602571	0.00040024	0.000592657	0.000630319	0.000504841	0.000124092	0.000655255	5.27555e-05	0.000541072	0.000123409
GDP-mannose GDP-glucose	GDP-mannose GDP-glucose	18396 46173703	HMDB0001163 HMDB0003351	604.069	7.15724	0.000470018	0.000485276	0.000751148	0.000932554	0.00101044	0.00028065	0.000810024	0.00133425	0.00060469	0.000568814	0.00015809	0.000741215	0.000400758	0.000916321	0.000376215
Gln	Gln	738	HMDB0000641,HMDB0003423	147.076	8.27571	0.0457779	0.038702	0.0520908	0.0387284	0.0439223	0.0545483	0.0304842	0.0478853	0.0508898	0.0455235	0.00669804	0.045733	0.00806388	0.0430864	0.0110167
Glu	Glu	611	HMDB0000148,HMDB0003339	148.06	8.41964	0.430453	0.428505	0.528211	0.373911	0.319012	0.561246	0.335038	0.479701	0.347319	0.46239	0.0570114	0.418056	0.127008	0.387352	0.0802114
Gluconic acid	Gluconic acid	10690	HMDB0000625	195.051	7.0758	0.000965058	0.000718209	0.00083923	0.000780701	0.000612449	0.000955772	0.000778609	0.000784984	0.000652396	0.000840833	0.000123432	0.000782974	0.000171673	0.000738663	7.47776e-05
Gluconolactone	1,5-Gluconolactone	7027	HMDB0000150	179.055	17.0916	0.000544416	N.D.	0.000407748	0.000352591	N.D.	0.000390101	0.000340704	N.D.	0.000299551	0.000476082	9.66392e-05	0.000371346	2.65236e-05	0.000320128	2.90995e-05
Glucosamine	Glucosamine	439213	HMDB0001514	180.086	7.14031	N.D.	N.D.	N.D.	N.D.	0.000233132	N.D.	0.000280864	0.000171289	0.000165202	N.A.	N.A.	0.000233132	N.A.	0.000205785	6.50913e-05
Glucose 1-phosphate	Glucose 1-phosphate	65533	HMDB0001586	259.022	8.66816	0.003243	0.00414637	0.00531798	0.00260596	0.00287528	0.00269615	0.00357214	0.00369396	0.0028849	0.00423578	0.00104038	0.00272579	0.000137084	0.00338367	0.000436215
Glucose 6-phosphate	G6P	5958	HMDB0001401	259.022	8.43749	0.0302042	0.025269	0.0374461	0.0231101	0.0285217	0.0154913	0.0273658	0.0303173	0.0293951	0.0309731	0.00612485	0.0223744	0.00654626	0.0290261	0.00150995
Glucuronic acid	Glucuronic acid	94715	HMDB0000127	193.035	7.01543	0.000976319	0.000591615	0.000864105	0.000601677	0.000363633	0.00103354	0.000704844	0.000616733	0.000579061	0.00081068	0.000197838	0.000666282	0.000339593	0.000633546	6.45548e-05
Glutamic acid γ-methyl ester 2-Aminoadipic acid O-Acetylhomoserine	Glutamic acid g-methyl ester 2-Aminoadipic acid O-Acetylhomoserine	68662 92136 439389	HMDB0061715 HMDB0000510	162.076	8.41087	0.0178255	0.0168497	0.014565	0.0122811	0.00216776	0.018053	0.00733624	0.00431464	0.00336576	0.0164134	0.00167343	0.0108339	0.00804087	0.00500555	0.00207345
Glutarylcarnitine	Glutarylcarnitine	71464488	HMDB0013130	276.144	7.79046	0.000375538	0.00025564	0.000435704	0.00210102	0.0032104	0.00230093	0.00384233	0.00391693	0.00507636	0.000355627	9.16681e-05	0.00253745	0.000591303	0.00427854	0.000691938
Glutathione (GSH)	GSH	124886	HMDB0000125	308.091	10.0866	0.135952	0.0830668	0.110952	0.146599	0.145309	0.133074	0.122648	0.156814	0.163556	0.10999	0.0264556	0.141661	0.00746437	0.147673	0.0219327
Glutathione (GSSG)_divalent	GSSG	65359		307.083	9.31143	0.017747	0.0189606	0.0323805	0.0248577	0.0279528	0.0235958	0.0286973	0.023999	0.0195154	0.0230294	0.00812099	0.0254687	0.00224187	0.0240706	0.00459141
Gly	Gly	750	HMDB0000123	76.0392	6.47187	0.0926486	0.0873701	0.116995	0.073881	0.062577	0.0998122	0.0595274	0.0654713	0.0570659	0.0990046	0.0158021	0.0787567	0.0190904	0.0606882	0.00432123
Gly-Gly	Gly-Gly	11163	HMDB0011733	133.061	6.48443	N.D.	N.D.	N.D.	0.000196638	0.000108273	0.000141244	0.000110029	0.000174656	0.000151924	N.A.	N.A.	0.000148718	4.4654e-05	0.000145536	3.27836e-05
Glyceraldehyde 3-phosphate	GAP	729	HMDB0001112	168.99	9.8435	0.00019518	N.D.	0.00020471	0.00013223	0.000132282	N.D.	0.00014932	0.000206044	9.41419e-05	0.000199945	6.73858e-06	0.000132256	3.68218e-08	0.000149835	5.5953e-05
Glyceric acid	Glyceric acid	439194	HMDB0000139,HMDB0006372	105.018	8.82984	N.D.	N.D.	N.D.	N.D.	N.D.	0.000451385	N.D.	N.D.	N.D.	N.A.	N.A.	0.000451385	N.A.	N.A.	N.A.
Glycerol	Glycerol	753	HMDB0000131	93.0546	16.4784	0.0217137	0.024445	0.0259111	0.0105424	0.0196531	0.0256209	0.00876212	0.0115862	0.0143757	0.0240232	0.00213024	0.0186055	0.00759366	0.0115747	0.00280683
Glycerol 3-phosphate	G3P	439162	HMDB0000126	171.006	10.1721	0.00864465	0.00661073	0.00843104	0.0111671	0.00884143	0.0136315	0.0124929	0.0139433	0.00662292	0.00789548	0.00111774	0.0112133	0.00239536	0.0110197	0.00387617
Glycerophosphocholine	Glycerophosphocholine	439285	HMDB0000086	258.11	16.1689	0.00360711	0.00293924	0.00549914	0.0124167	0.0289816	0.00369251	0.0173959	0.0119629	0.0100551	0.00401516	0.00132784	0.0150303	0.0128455	0.013138	0.00380885
Glycerophosphorylethanolamine	Glycerophosphorylethanolamine	444183	HMDB0000114	216.063	16.1536	0.00193837	0.00141793	0.00259104	0.00434201	0.00803568	0.00268901	0.00518521	0.0035188	0.00332748	0.00198245	0.000587797	0.00502223	0.00273747	0.00401049	0.00102182
Glycocholic acid	Glycocholic acid	10140	HMDB0000138	464.303	10.2547	0.000115509	N.D.	N.D.	N.D.	N.D.	N.D.	N.D.	N.D.	0.000221498	0.000115509	N.A.	N.A.	N.A.	0.000221498	N.A.
GMP	GMP	6804	HMDB0001397	362.051	7.8479	0.00532242	0.00370076	0.00576492	0.00467998	0.00667137	0.00339212	0.0033411	0.00373567	0.00467969	0.00492937	0.00108676	0.00491449	0.00165215	0.00391882	0.000687832
GTP	GTP	6830	HMDB0001273	521.983	9.62449	N.D.	N.D.	0.000266694	0.000125588	0.000144594	N.D.	N.D.	N.D.	8.65293e-05	0.000266694	N.A.	0.000135091	1.34391e-05	8.65293e-05	N.A.
Guanine	Guanine	764	HMDB0000132	152.057	6.46195	N.D.	0.000110903	0.000199783	N.D.	N.D.	N.D.	0.000217163	0.000242835	0.00011404	0.000155343	6.28476e-05	N.A.	N.A.	0.000191346	6.81682e-05
Guanosine	Guanosine	6802	HMDB0000133	284.099	9.69135	0.00843759	0.00740167	0.0106499	0.00892909	0.0109812	0.0107796	0.0115042	0.0132154	0.0127261	0.0088297	0.00165921	0.0102299	0.00113107	0.0124819	0.000881354
H-Asp(Gly-OH)-OH	H-Asp(Gly-OH)-OH	99717	HMDB0011165	191.066	9.18232	0.00379145	0.0029549	0.00392611	0.00275535	0.00286669	0.00286119	0.0028318	0.00294685	0.0033806	0.00355749	0.000526178	0.00282774	6.27582e-05	0.00305308	0.000289409
Heptadecanoic acid	Heptadecanoic acid	10465	HMDB0002259	269.249	14.8039	0.000165399	0.000142268	0.000135743	0.000203609	0.00014688	0.000211377	0.000180579	0.000153719	0.000136531	0.000147803	1.55839e-05	0.000187289	3.52102e-05	0.000156943	2.22003e-05
Hercynine	Hercynine	440727		198.124	6.53673	0.000283371	0.000249375	0.000369564	0.000561821	0.000455206	0.00041566	0.000465211	0.000388873	0.000395236	0.00030077	6.19549e-05	0.000477562	7.5602e-05	0.00041644	4.23565e-05
Hexadecanedioic acid	Hexadecanedioic acid	10459	HMDB0000672	285.206	11.9289	N.D.	0.000150774	N.D.	6.30301e-05	N.D.	0.0010847	8.25395e-05	N.D.	N.D.	0.000150774	N.A.	0.000573864	0.000722429	8.25395e-05	N.A.
His	His	773	HMDB0000177	156.077	5.67799	0.0815634	0.0652071	0.100289	0.0782404	0.0375918	0.106742	0.0624042	0.0523203	0.0536467	0.0823531	0.0175542	0.0741914	0.0347524	0.0561237	0.00547937
Homoarginine	Homoarginine	9085	HMDB0000670	189.136	5.58334	0.000938846	0.00036905	0.000437067	0.000946378	0.00192173	0.00136468	0.000665644	0.00144944	0.0035005	0.000581654	0.000311201	0.00141093	0.000489315	0.00187186	0.00146387
Homocitrulline	Homocitrulline	65072	HMDB0000679	190.119	8.56484	0.000440227	0.000451757	0.000609576	0.000547292	0.000522473	0.000559594	0.00101632	0.00114179	0.00119508	0.00050052	9.46211e-05	0.00054312	1.89086e-05	0.00111773	9.17759e-05
Homocysteic acid	Homocysteic acid	177491	HMDB0002205	182.013	8.05202	N.D.	0.000109715	0.000145173	0.000147325	0.000121688	0.000102094	9.18584e-05	7.41871e-05	0.000109875	0.000127444	2.50728e-05	0.000123702	2.26827e-05	9.19733e-05	1.7844e-05
Homoserine	Homoserine	12647	HMDB0000719	120.066	7.76796	0.000914802	0.00146743	0.00142848	0.00114641	0.00125642	0.000770114	0.000572988	0.000609403	0.000949426	0.00127024	0.00030843	0.00105765	0.000255016	0.000710606	0.000207624
Hydroxyproline	Hydroxyproline	5810	HMDB0000725	132.066	9.19863	0.00130866	0.00211091	0.00149189	0.000629627	0.000311457	0.000916738	0.00056205	0.00109676	0.000659638	0.00163716	0.000420391	0.000619274	0.000302774	0.000772815	0.000284754
Hypotaurine	Hypotaurine	107812	HMDB0000965	110.027	13.4366	0.00549855	0.00709653	0.00807177	0.000800111	0.000833009	0.00181733	0.000416309	0.000782797	0.00125484	0.00688895	0.00129911	0.00115015	0.000578032	0.00081798	0.000420369
Hypoxanthine	Hypoxanthine	790	HMDB0000157	137.046	8.73509	0.00531822	0.00335528	0.00222011	0.0055199	0.00400793	0.0100411	0.00700455	0.00742226	0.00630308	0.0036312	0.00156738	0.00652297	0.00313916	0.00690996	0.000565554
Ile	Ile	791	HMDB0000172	132.102	7.82297	0.0469022	0.0415416	0.0406957	0.0600761	0.0141985	0.115767	0.0466048	0.0400228	0.0212701	0.0430465	0.00336584	0.0633471	0.050863	0.0359659	0.0131455
Imidazole-4-acetic acid	Imidazole-4-acetic acid	96215	HMDB0002024	127.05	6.21376	0.000565597	0.000612785	0.000784812	0.00144475	0.000586976	0.000860914	0.000857391	0.00125205	0.000871316	0.000654398	0.00011538	0.000964214	0.000438119	0.000993587	0.000223947
Imidazolelactic acid	Imidazolelactic acid	793		157.061	6.8118	N.D.	N.D.	N.D.	N.D.	8.43145e-05	N.D.	0.000223276	0.000192753	0.000147628	N.A.	N.A.	8.43145e-05	N.A.	0.000187885	3.80581e-05
IMP	IMP	8582	HMDB0000175	347.04	8.13775	0.00343943	0.00184194	0.00184606	0.00272098	0.00292309	0.000694238	0.00247262	0.00203441	0.00176916	0.00237581	0.000921122	0.00211277	0.00123263	0.00209206	0.000355258
Inosine	Inosine	6021	HMDB0000195	269.088	14.7296	0.0215225	0.0125696	0.00997755	0.0235999	0.0223811	0.0304172	0.0313934	0.0336577	0.0336501	0.0146899	0.00605747	0.0254661	0.00433086	0.0329004	0.00130513
Isethionic acid	Isethionic acid	7866	HMDB0003903	124.991	9.71188	0.000850786	0.000497514	0.000813947	0.000765002	0.00074559	0.000869753	0.000600261	0.000709397	0.000734865	0.000720749	0.000194203	0.000793448	6.67906e-05	0.000681508	7.15048e-05
Isobutyrylcarnitine Butyrylcarnitine-1	Isobutyrylcarnitine Butyrylcarnitine	168379 439829	HMDB0000736 HMDB0002013	232.154	7.30492	0.000460836	0.000362157	0.000449341	0.000291082	N.D.	0.00058448	0.000711007	0.00104162	0.00020621	0.000424111	5.39608e-05	0.000437781	0.000207464	0.000652947	0.000420723
Isoglutamic acid	Isoglutamic acid	73064		148.061	7.0696	0.00166702	0.00160464	0.00221125	0.00298298	0.00315097	0.00227604	0.00416727	0.00375869	0.00464324	0.00182764	0.000333676	0.00280333	0.000464306	0.00418973	0.000442706
Isonicotinamide Nicotinamide	Isonicotinamide Nicotinamide	15074 936	HMDB0001406	123.055	5.77264	0.0345896	0.0316693	0.0413509	0.0475083	0.0517424	0.0518922	0.0468499	0.0431035	0.0427121	0.03587	0.00496617	0.050381	0.00248894	0.0442218	0.0022844
Isovalerylcarnitine-1	Isovalerylcarnitine	6426851	HMDB0000688	246.169	7.45999	0.0002599	0.00040727	N.D.	0.000388432	N.D.	0.00047014	0.000418561	0.0007647	0.000218708	0.000333585	0.000104206	0.000429286	5.77761e-05	0.000467323	0.000276243
Isovalerylcarnitine-2	Isovalerylcarnitine	6426851	HMDB0000688	246.17	7.51949	0.000476293	0.000484338	0.000295924	0.000404899	N.D.	0.000706891	0.000618673	0.00115021	N.D.	0.000418852	0.000106534	0.000555895	0.00021354	0.000884439	0.000375851
Kynurenine	Kynurenine	846	HMDB0000684	209.093	7.73178	0.000329169	0.000159149	0.000175236	0.000168546	N.D.	0.000485609	0.000245796	0.000135516	N.D.	0.000221184	9.38623e-05	0.000327078	0.000224197	0.000190656	7.79795e-05
Lactic acid	Lactic acid	612	HMDB0000190,HMDB0001311	89.0243	9.14064	0.0403944	0.0405434	0.0470605	0.0568505	0.0433109	0.0646888	0.0563239	0.0676533	0.0382457	0.0426661	0.00380641	0.0549501	0.0108149	0.0540743	0.0148323
Lauric acid	Lauric acid	3893	HMDB0000638	199.17	6.6652	0.000193095	0.00017259	0.000240596	0.000293744	0.00014488	0.000256755	0.000167612	0.000128218	0.000231422	0.000202093	3.48846e-05	0.000231793	7.75075e-05	0.00017575	5.2081e-05
Leu	Leu	857	HMDB0000687	132.102	7.91174	0.0742993	0.0623299	0.0644664	0.102675	0.0363018	0.17107	0.0859569	0.0776602	0.0549898	0.0670319	0.00638382	0.103349	0.0673868	0.0728689	0.0160299
Linoleic acid	Linoleic acid	5280450	HMDB0000673	279.233	14.0974	0.00777424	0.00425719	0.00266095	0.00240608	0.00188491	0.00218275	0.00287235	0.00128905	0.00230214	0.00489746	0.00261609	0.00215791	0.000261469	0.00215451	0.000801905
Linolenic acid	Linolenic acid	5280934	HMDB0001388	277.218	13.6689	0.0169095	0.0106471	0.00692324	0.00626987	0.00764533	0.00815789	0.0055379	0.00468685	0.00527629	0.0114933	0.00504662	0.0073577	0.00097632	0.00516701	0.00043592
LPC(24:0)	LPC(24:0)	24779481	HMDB0010405	608.476	15.6918	0.000724939	0.00080881	0.000928064	0.000827007	0.000624883	0.000971377	0.000415012	0.000433948	0.000389518	0.000820604	0.000102075	0.000807756	0.000174047	0.000412826	2.22956e-05
Lys	Lys	866	HMDB0000182,HMDB0003405	147.113	5.34556	0.0489282	0.0402339	0.0506344	0.0696208	0.0420651	0.0836082	0.0670683	0.0842176	0.05422	0.0465988	0.00557779	0.065098	0.0211376	0.0685019	0.0150501
Malic acid	Malic acid	525	HMDB0000156,HMDB0000744	133.014	15.8536	0.0456897	0.0311585	0.040478	0.0448951	0.0273767	0.0750338	0.0385598	0.0411111	0.0209535	0.0391087	0.00736171	0.0491019	0.0241054	0.0335415	0.0109759
Met	Met	876	HMDB0000696	150.058	8.24695	0.0133534	0.00733024	0.00994618	0.00890681	0.0050773	0.0110197	0.00644732	0.00918566	0.00728531	0.0102099	0.00302021	0.0083346	0.00301224	0.00763943	0.00140309
Methionine sulfoxide	Methionine sulfoxide	158980	HMDB0002005	166.053	9.04449	0.00208607	0.00107018	0.00170259	0.00130769	0.00080859	0.00184558	0.00105236	0.00103447	0.00147745	0.00161961	0.000513002	0.00132062	0.000518618	0.00118809	0.00025075
Monoethyl phosphate	Monoethyl phosphate	74190	HMDB0012228	125.001	11.0903	0.00174578	0.00219387	0.00323662	0.000496919	0.000686035	0.000641236	0.000835076	0.000531908	0.000121293	0.00239209	0.000764933	0.000608063	9.88255e-05	0.000496092	0.000358237
Monomethyl glutaric acid	Monomethyl glutaric acid	73917	HMDB0000858	145.051	7.6136	N.D.	N.D.	0.000229993	N.D.	N.D.	N.D.	9.64314e-05	N.D.	7.10505e-05	0.000229993	N.A.	N.A.	N.A.	8.37409e-05	1.79471e-05
myo-Inositol 2-phosphate	Myoinositol 2-phosphate	160886		259.022	8.97656	0.000704401	0.000536758	0.000821288	0.000683792	0.000897629	0.000787643	0.000827918	0.000728154	0.000898281	0.000687482	0.000143017	0.000789688	0.000106933	0.000818118	8.54861e-05
myo-Inositol 3-phosphate myo-Inositol 1-phosphate	Myoinositol 3-phosphate Myoinositol 1-phosphate	440194 107737	HMDB0006814 HMDB0000213	259.022	8.78659	0.00112687	0.000702596	0.00123071	0.000825381	0.000705218	0.000859761	0.00097346	0.000777985	0.000756688	0.00102006	0.00027979	0.000796787	8.11422e-05	0.000836044	0.000119481
Myristic acid	Myristic acid	11005	HMDB0000806	227.202	13.7381	0.000213065	0.000233499	0.000126085	0.000198485	0.000155943	0.000175618	0.000192205	8.75269e-05	0.000152189	0.000190883	5.70395e-05	0.000176682	2.1291e-05	0.000143973	5.28202e-05
Myristoleic acid	Myristoleic acid	5281119	HMDB0002000	225.187	6.51497	0.000127618	N.D.	N.D.	N.D.	N.D.	N.D.	8.84783e-05	N.D.	N.D.	0.000127618	N.A.	N.A.	N.A.	8.84783e-05	N.A.
N,N-Dimethylglycine	DMG	673	HMDB0000092	104.071	8.40335	0.00179068	0.00113785	0.00185327	0.00276697	0.00232164	0.00176756	0.00260981	0.0034502	0.00293029	0.00159393	0.000396218	0.00228539	0.000500689	0.00299677	0.000424117
N-Acetylalanine N-Acetyl-β-alanine Propionylglycine	N-Acetylalanine N-Acetyl-b-alanine Propionylglycine	88064 76406 98681	HMDB0000766 HMDB0000783	130.051	7.68871	0.000126367	N.D.	0.000163116	0.000274423	0.000205868	0.000146407	0.000191869	0.000156493	0.000209599	0.000144741	2.59855e-05	0.000208899	6.40616e-05	0.000185987	2.70372e-05
N-Acetylaspartic acid	N-Acetylaspartic acid	65065	HMDB0000812	174.041	11.9277	N.D.	N.D.	N.D.	N.D.	N.D.	N.D.	9.56361e-05	N.D.	0.000128906	N.A.	N.A.	N.A.	N.A.	0.000112271	2.35253e-05
N-Acetylglucosamine 1-phosphate	GlcNAc-P	440272	HMDB0001367	300.049	8.19449	0.000580119	0.000231245	0.000367826	0.000299782	0.000187829	0.000473542	0.000289095	0.00028947	0.00019615	0.000393063	0.000175801	0.000320384	0.000143966	0.000258238	5.37704e-05
N-Acetylglucosamine 6-phosphate	N-Acetylglucosamine 6-phosphate	440996	HMDB0001062	300.049	7.88984	0.000242724	0.000116888	0.000187175	0.000256611	0.000219039	0.000322356	0.000277166	0.000244118	0.000241825	0.000182263	6.30616e-05	0.000266002	5.2295e-05	0.00025437	1.97753e-05
N-Acetylhistidine	N-Acetylhistidine	75619		198.088	7.53548	0.000609677	0.000335841	0.000422748	0.000553104	0.000563479	0.000787601	0.000507678	0.000305543	0.000337825	0.000456089	0.000139929	0.000634728	0.000132494	0.000383682	0.00010859
N-Acetyllysine Ile-Gly	N-Acetyllysine Ile-Gly	92907 6992869	HMDB0000446 HMDB0028907	189.123	7.5055	0.000598228	0.000575817	0.000642987	0.00125925	0.00097814	0.000900596	0.0009375	0.00101553	0.00115603	0.000605677	3.41987e-05	0.001046	0.000188713	0.00103635	0.000110741
N-Acetylneuraminic acid	NAN	439197	HMDB0000230	308.099	6.27433	0.000343234	0.000235465	0.00038373	0.000290121	0.000267714	0.000283691	0.000173179	0.000249997	0.000231929	0.000320809	7.66341e-05	0.000280509	1.15376e-05	0.000218368	4.01642e-05
N-Acetylornithine	N-Acetylornithine	439232	HMDB0003357	175.107	7.35185	0.000330313	0.000333335	0.000375701	0.000315298	0.000281509	0.000217919	0.000165687	0.000227264	0.000202305	0.00034645	2.5377e-05	0.000271575	4.94439e-05	0.000198418	3.09716e-05
N-Acetyltaurine	N-Acetyltaurine	159864	HMDB0240253	166.018	8.05511	0.000324466	0.00025783	0.000270364	0.000402426	0.000382244	0.000403162	0.000324288	0.000325304	0.000452186	0.00028422	3.54134e-05	0.000395944	1.18704e-05	0.000367259	7.35503e-05
N-Acetylthreonine-1	N-Acetylthreonine	152204	HMDB0062557	160.061	7.17331	N.D.	N.D.	N.D.	N.D.	0.000125983	N.D.	0.000131823	N.D.	0.000229899	N.A.	N.A.	0.000125983	N.A.	0.000180861	6.93505e-05
N-Acetylthreonine-2	N-Acetylthreonine	152204	HMDB0062557	160.061	7.31632	0.000351992	0.000290744	0.000532573	0.000860099	0.000954321	0.000962289	0.000858538	0.000840414	0.000803124	0.00039177	0.000125726	0.00092557	5.6839e-05	0.000834025	2.82539e-05
N-Methylalanine	N-Methylalanine	5288725		104.07	7.88672	0.00122851	0.00124562	0.00186555	0.00397343	0.00365086	0.00140033	0.00621375	0.00452591	0.00770476	0.00144656	0.000362954	0.00300821	0.00140177	0.00614814	0.00159044
N-Methylglutamic acid	N-Methylglutamic acid	439377		162.076	9.64119	0.00143804	0.00103447	0.00221057	0.00503315	0.00549334	0.00580444	0.00477662	0.00580322	0.00453897	0.00156102	0.000597617	0.00544364	0.000388042	0.0050396	0.000671902
N-Methylproline	N-Methylproline	557		130.086	9.48343	0.000178037	N.D.	0.000227057	0.000473674	0.000666223	0.000334949	0.000462637	0.00043643	0.000454209	0.000202547	3.46621e-05	0.000491615	0.000166364	0.000451092	1.33787e-05
N-Methylputrescine Cadaverine	N-Methylputrescine Cadaverine	439791 273	HMDB0003661 HMDB0002322	103.123	3.90363	0.000140254	0.000135966	9.20501e-05	0.000480454	0.000105969	0.00516683	0.00112281	0.000356888	0.0001281	0.000122757	2.6679e-05	0.00191775	0.00282001	0.000535934	0.000520966
N-Oleoyltaurine	N-Oleoyltaurine	6437033	HMDB0242113	390.268	15.2398	0.00168039	0.000835713	0.00102422	0.00308851	0.00265226	0.00278546	0.00156551	0.00120092	0.00207423	0.00118011	0.000443392	0.00284208	0.000223567	0.00161355	0.000438633
N1-Acetylspermidine	N1-Acetylspermidine	496	HMDB0001276	188.176	4.92525	0.000137392	0.000122181	0.000120006	0.000242164	0.000128545	0.000223299	0.00015507	N.D.	0.000162469	0.000126526	9.47262e-06	0.000198003	6.08874e-05	0.000158769	5.23134e-06
N5-Ethylglutamine	N5-Ethylglutamine	439378	HMDB0034365	175.108	8.70505	0.00105391	0.00115101	0.00114892	0.00185207	0.00170195	0.00179379	0.00184958	0.00229031	0.00221246	0.00111795	5.54661e-05	0.00178261	7.56818e-05	0.00211745	0.000235224
N6-Methyllysine	N6-Methyllysine	164795	HMDB0002038	161.129	5.51362	0.000529532	0.000515667	0.000609576	0.000495468	0.000440463	0.000559594	0.00061256	0.0008434	0.000507714	0.000551592	5.06923e-05	0.000498508	5.96238e-05	0.000654558	0.000171739
NAD+	NAD+	5893	HMDB0000902	662.102	5.72688	0.000214365	9.07256e-05	0.000168825	0.000273517	0.000293483	0.000191155	0.000131027	0.000164611	0.00018194	0.000157972	6.253e-05	0.000252718	5.42423e-05	0.000159193	2.58852e-05
NADP+	NADP+	5886	HMDB0000217	742.067	8.03661	0.000348655	0.000117732	0.000262208	0.000295857	0.000392838	0.000149448	0.000170992	0.00017217	0.000235735	0.000242865	0.00011667	0.000279381	0.000122529	0.000192966	3.70443e-05
NADPH_divalent	NADPH	5884		371.538	9.51053	N.D.	N.D.	N.D.	N.D.	0.000166355	N.D.	N.D.	N.D.	N.D.	N.A.	N.A.	0.000166355	N.A.	N.A.	N.A.
Nicotinic acid	Nicotinic acid	938	HMDB0001488	124.039	7.73544	0.00168191	0.000998752	0.00136575	0.000940082	0.000387017	0.00187854	0.000602587	0.000381719	0.000321032	0.0013488	0.000341893	0.00106855	0.000754014	0.000435112	0.000148177
Ne-(1-carboxyethyl)lysine	Ne-(1-carboxyethyl)lysine	22283604	HMDB0243495	219.134	7.39304	0.000255893	0.000293861	0.000439795	0.000167578	0.000140524	0.00022868	0.000117107	0.000158664	0.00010662	0.00032985	9.70894e-05	0.000178927	4.51606e-05	0.000127464	2.75241e-05
Nω-Methylarginine	Nw-Methylarginine	132862		189.135	5.77727	0.000120218	N.D.	N.D.	0.000198575	0.000207791	0.000126447	0.000192068	0.000215059	0.000151533	0.000120218	N.A.	0.000177604	4.45429e-05	0.00018622	3.2164e-05
O-Acetylcarnitine	ALCAR	439756	HMDB0000201	204.123	6.97096	0.0227704	0.0164387	0.0162499	0.050115	0.0334931	0.0153915	0.0295506	0.0359443	0.0239434	0.0184863	0.00371134	0.0329999	0.017367	0.0298127	0.00600471
O-Phosphoserine	3-Phosphoserine	68841	HMDB0000272	184.001	10.0706	N.D.	N.D.	N.D.	0.000469145	0.000496201	0.000427491	0.000230441	0.000264554	0.000271007	N.A.	N.A.	0.000464279	3.46126e-05	0.000255334	2.17979e-05
Octadecanedioic acid	Octadecanedioic acid	70095	HMDB0000782	313.238	12.7304	N.D.	0.000146437	N.D.	5.89306e-05	N.D.	0.000838675	N.D.	N.D.	N.D.	0.000146437	N.A.	0.000448803	0.000551362	N.A.	N.A.
Oleamide-1	Oleamide	5283387	HMDB0002117	282.279	13.8838	1.1999	1.33835	1.34949	1.39345	1.13263	1.24867	1.07909	0.841807	0.869588	1.29591	0.0833333	1.25825	0.130676	0.930163	0.129724
Oleamide-2	Oleamide	5283387	HMDB0002117	282.279	14.0085	0.241593	0.269054	0.273115	0.285912	0.230579	0.252323	0.220749	0.16666	0.173336	0.261254	0.0171476	0.256271	0.0278771	0.186915	0.0294906
Oleic acid	Oleic acid	445639	HMDB0000207	281.249	14.5655	0.0152024	0.0129475	0.00932148	0.00719739	0.00725801	0.00801358	0.00636639	0.00492142	0.00641896	0.0124905	0.002967	0.00748966	0.00045474	0.00590226	0.000849835
Ophthalmic acid	Ophthalmic acid	7018721	HMDB0005765	290.135	10.069	0.00445322	0.00343047	0.00341881	0.00400588	0.00456588	0.00529529	0.00461704	0.00500737	0.0060707	0.0037675	0.000593881	0.00462235	0.000646556	0.00523171	0.000752346
Ornithine	Ornithine	389	HMDB0000214,HMDB0003374	133.097	5.30946	0.0195578	0.0192131	0.0186398	0.024369	0.0157654	0.0319547	0.0136655	0.0245954	0.0116712	0.0191369	0.000463706	0.0240297	0.00809996	0.016644	0.00695791
p-Hydroxyphenylacetic acid 3-Hydroxyphenylacetic acid	4-Hydroxyphenylacetic acid 3-Hydroxyphenylacetic acid	127 12122	HMDB0000020 HMDB0000440	151.04	7.4934	0.000309036	0.000325346	0.000266694	0.000136457	N.D.	0.000389694	0.000346954	N.D.	N.D.	0.000300359	3.02735e-05	0.000263075	0.000179066	0.000346954	N.A.
p-Toluic acid o-Toluic acid	p-Toluic acid o-Toluic acid	7470 8373		135.045	7.8849	0.000655606	0.000689093	0.000712408	0.000603186	0.000493624	0.000612129	0.000296651	0.000480397	0.00039433	0.000685702	2.85524e-05	0.000569646	6.59888e-05	0.000390459	9.19341e-05
Palmitic acid	Palmitic acid	985	HMDB0000220	255.233	14.4741	0.00987391	0.00896187	0.0089671	0.010743	0.00839586	0.00734496	0.0077662	0.00586354	0.00662428	0.00926763	0.000525061	0.00882793	0.00173972	0.00675134	0.000957675
Palmitoleic acid	Palmitoleic acid	445638	HMDB0003229	253.218	13.8875	0.00284198	0.00202794	0.00134724	0.00121107	0.000947786	0.000941979	0.00104731	0.000549669	0.00115185	0.00207239	0.000748357	0.00103361	0.000153708	0.000916277	0.000321766
Palmitoylcarnitine	Palmitoylcarnitine	11953816	HMDB0000222	400.342	11.4989	0.00201932	0.00150486	0.00164435	0.000885702	0.00147683	0.000640141	0.00151846	0.00127488	0.00146238	0.00172284	0.000266061	0.00100089	0.000430075	0.00141857	0.00012756
Palmitoylethanolamide	Palmitoylethanolamide	4671	HMDB0002100	300.29	13.615	0.00091603	N.D.	0.000705328	0.000866919	0.000834379	0.00126274	0.00089261	N.D.	0.000759471	0.000810679	0.000148988	0.000988012	0.000238475	0.00082604	9.41434e-05
Pantothenic acid	Pantothenic acid	6613	HMDB0000210	218.103	6.66151	0.00202938	0.0013381	0.00194026	0.00244777	0.00293655	0.00261969	0.00266489	0.00262622	0.00255249	0.00176924	0.000376034	0.002668	0.000247948	0.00261453	5.7104e-05
Pelargonic acid	Pelargonic acid	8158	HMDB0000847	157.123	7.05981	0.000279842	0.00028146	0.000214089	0.000175099	0.000150321	0.000268051	0.000115917	0.000156493	0.000138295	0.000258464	3.8438e-05	0.000197823	6.20676e-05	0.000136901	2.0324e-05
Pentadecanoic acid	Pentadecanoic acid	13849	HMDB0000826	241.219	14.1023	9.75554e-05	N.D.	N.D.	7.54995e-05	N.D.	6.32542e-05	5.43805e-05	N.D.	N.D.	9.75554e-05	N.A.	6.93769e-05	8.65872e-06	5.43805e-05	N.A.
Phe	Phe	994	HMDB0000159	166.086	8.48971	0.0356968	0.0109549	0.0176334	0.0174513	0.00721096	0.0236005	0.00753056	0.0124343	0.0088354	0.0214284	0.0128	0.0160876	0.00827942	0.00960008	0.00253971
Phenol sulphate	Phenol sulphate	74426	HMDB0060015	172.991	9.14114	N.D.	N.D.	N.D.	N.D.	N.D.	N.D.	N.D.	0.000129898	N.D.	N.A.	N.A.	N.A.	N.A.	0.000129898	N.A.
Phosphoenolpyruvic acid	PEP	1005	HMDB0000263	166.973	15.7539	0.000291102	N.D.	0.000273219	0.000208911	N.D.	N.D.	N.D.	N.D.	0.00013728	0.000282161	1.26455e-05	0.000208911	N.A.	0.00013728	N.A.
Phosphorylcholine	Phosphorylcholine	1014	HMDB0001565	184.073	15.2803	0.0290664	0.0220471	0.0278544	0.0276721	0.030526	0.0230409	0.0325648	0.0316561	0.031001	0.0263226	0.00375198	0.0270797	0.00377757	0.0317406	0.000785288
Phytosphingosine	Phytosphingosine	122121	HMDB0004610	318.3	10.8481	0.00173296	0.00187005	0.00156706	0.00124609	0.00120336	0.00102348	0.00116781	0.0012818	0.00118847	0.00172335	0.000151724	0.00115764	0.000118135	0.00121269	6.07365e-05
Picolinic acid	Picolinic acid	1018	HMDB0002243	124.039	14.0742	N.D.	N.D.	N.D.	0.000576836	N.D.	0.00068604	N.D.	N.D.	N.D.	N.A.	N.A.	0.000631438	7.72195e-05	N.A.	N.A.
Pipecolic acid	Pipecolic acid	439227	HMDB0000070,HMDB0000716,HMDB0005960	130.086	7.88298	0.00091423	0.000506268	0.000540709	0.000771051	0.000685113	0.000934898	0.00131456	0.00128699	0.00112127	0.000653736	0.000226251	0.000797021	0.000126901	0.00124094	0.00010455
Pro	Pro	614	HMDB0000162,HMDB0003411	116.071	8.28948	0.0529286	0.0507252	0.0560469	0.0524053	0.0212579	0.0798228	0.0254499	0.0326999	0.013115	0.0532336	0.00267393	0.051162	0.0293023	0.0237549	0.00990181
Propionylcarnitine	Propionylcarnitine	188824	HMDB0000824	218.139	7.17573	0.00265224	0.00206893	0.00190714	0.00172566	0.000970769	0.00290222	0.0028762	0.00143134	0.000608476	0.00220944	0.000391917	0.00186622	0.000973367	0.00163867	0.00114799
Putrescine	Putrescine	1045	HMDB0001414	89.1073	3.69884	0.00292244	0.00220803	0.0033588	0.00334235	0.00362783	0.00346719	0.00262011	0.00354237	0.00423863	0.00282976	0.000580958	0.00347912	0.00014311	0.00346704	0.000811887
Pyridoxal	Pyridoxal	1050	HMDB0001545	168.064	6.76498	N.D.	N.D.	N.D.	0.00015886	N.D.	9.34898e-05	0.000141236	N.D.	7.8891e-05	N.A.	N.A.	0.000126175	4.62236e-05	0.000110064	4.40848e-05
Pyridoxamine 5'-phosphate	Pyridoxamine-P	1053	HMDB0001555	249.064	8.03928	0.000401299	0.000340854	0.000382519	0.000739086	0.000786014	0.00077953	0.000757335	0.000881698	0.000831089	0.000374891	3.09364e-05	0.00076821	2.54298e-05	0.000823374	6.25394e-05
Quinic acid	Quinic acid	6508	HMDB0003072	191.056	7.00863	N.D.	N.D.	N.D.	7.487e-05	N.D.	N.D.	N.D.	0.000135776	N.D.	N.A.	N.A.	7.487e-05	N.A.	0.000135776	N.A.
Quinolinic acid	Quinolinic acid	1066	HMDB0000232	166.013	12.6545	N.D.	N.D.	N.D.	N.D.	N.D.	N.D.	N.D.	0.000133537	0.000234974	N.A.	N.A.	N.A.	N.A.	0.000184255	7.1727e-05
Retinol	Retinol	445354	HMDB0000305	269.227	13.7393	0.00179756	0.00135488	0.00118853	0.00712435	0.00584245	0.00435657	0.015264	0.00921821	0.0171619	0.00144699	0.000314792	0.00577446	0.00138514	0.0138814	0.00414842
Ribose 5-phosphate	R5P	439167	HMDB0001548	229.012	8.98521	0.00109143	0.000803871	0.00101621	0.00118947	0.00089133	0.000914066	0.000883192	0.0010487	0.000755673	0.000970502	0.000149127	0.000998287	0.000165956	0.000895854	0.000146923
Ribulose 5-phosphate	Ru5P	439184	HMDB0000618	229.012	9.31336	0.00421765	0.00336275	0.0035339	0.0049058	0.00415228	0.00580458	0.00540294	0.00572865	0.00437392	0.00370477	0.000452335	0.00495422	0.000827211	0.0051685	0.000707138
Ricinoleic acid-1	Ricinoleic acid	643684	HMDB0034297	297.243	12.6839	8.69101e-05	9.62351e-05	8.16564e-05	N.D.	N.D.	8.31205e-05	9.11938e-05	8.07436e-05	5.22953e-05	8.82672e-05	7.38348e-06	8.31205e-05	N.A.	7.47442e-05	2.01313e-05
Ricinoleic acid-2	Ricinoleic acid	643684	HMDB0034297	297.244	12.4808	0.000465374	0.000499688	0.000304675	0.000328303	0.000274699	0.00024666	0.000237802	0.000188511	0.000232249	0.000423246	0.000104109	0.000283221	4.14834e-05	0.000219521	2.69982e-05
S-Adenosylhomocysteine	SAH	439155	HMDB0000939	385.128	6.7613	0.000469423	0.000379075	0.000401611	0.000492562	0.000428023	0.00100687	0.000522478	0.000385085	0.00034095	0.000416703	4.70269e-05	0.000642484	0.00031721	0.000416171	9.46723e-05
S-Adenosylmethionine	SAM	34755	HMDB0001185	399.144	5.53976	0.00207405	0.00164412	0.00203397	0.00225794	0.00146928	0.00284169	0.00159671	0.00194142	0.00142902	0.00191738	0.000237496	0.00218964	0.000688747	0.00165572	0.000261246
S-Lactoylglutathione	S-Lactoylglutathione	440018	HMDB0001066	380.112	10.4915	N.D.	N.D.	N.D.	N.D.	0.000184294	N.D.	0.000206868	N.D.	N.D.	N.A.	N.A.	0.000184294	N.A.	0.000206868	N.A.
S-Methylmethionine	S-Methylmethionine	145692		164.074	5.69359	9.78918e-05	N.D.	9.61412e-05	0.000200512	N.D.	0.000478883	0.000144775	N.D.	N.D.	9.70165e-05	1.23792e-06	0.000339698	0.000196838	0.000144775	N.A.
Saccharopine	Saccharopine	160556	HMDB0000279	277.14	8.24622	0.000146552	N.D.	N.D.	0.000345326	0.000193969	0.000310063	0.000245474	0.000139725	0.000141379	0.000146552	N.A.	0.00028312	7.91941e-05	0.000175526	6.05827e-05
Sarcosine	Sarcosine	1088	HMDB0000271	90.0549	7.32685	0.0381486	0.0413204	0.0443695	0.0857233	0.0748469	0.0536618	0.052379	0.0504226	0.0638103	0.0412795	0.00311064	0.0714107	0.0163046	0.0555373	0.00723109
SDMA	SDMA	169148	HMDB0003334	203.15	6.03054	0.00081691	0.000831458	0.000972322	0.000691137	0.000749616	0.000523947	0.000558832	0.000584572	0.000674088	0.000873563	8.58359e-05	0.0006549	0.000117118	0.000605831	6.04974e-05
Sedoheptulose 7-phosphate	S7P	165007	HMDB0001068	289.033	8.25	0.0044562	0.00191115	0.0033508	0.00389203	0.00363461	0.0021683	0.00220659	0.00327319	0.0023741	0.00323938	0.00127618	0.00323165	0.000929837	0.00261796	0.000573595
Ser	Ser	617	HMDB0000187,HMDB0003406	106.05	7.7242	0.0420826	0.0480078	0.0523076	0.0622576	0.0431603	0.0632563	0.0331596	0.0485797	0.0428663	0.047466	0.00513398	0.0562247	0.0113252	0.0415352	0.00779573
Sitosterol	Sitosterol	222284	HMDB0000852	397.384	16.3145	N.D.	N.D.	0.000327409	0.00091094	0.000688858	0.000418431	0.0017577	0.00167349	0.00111555	0.000327409	N.A.	0.000672743	0.00024665	0.00151558	0.000348984
Spermidine	Spermidine	1102	HMDB0001257	146.165	3.55739	0.00347373	0.00243422	0.00365473	0.003724	0.0034334	0.00382905	0.00245635	0.00315686	0.0030209	0.00318756	0.000658656	0.00366215	0.00020495	0.00287804	0.000371463
Sphinganine	Sphinganine	91486	HMDB0000269	302.305	11.1222	0.00187422	0.000954773	0.00135893	0.00134411	0.00119886	0.00151528	0.00151047	0.00120565	0.00143037	0.00139597	0.000460841	0.00135275	0.000158391	0.00138216	0.000158021
Sphingosine	Sphingosine	5280335	HMDB0000252	300.29	10.9333	0.0198126	0.0176032	0.0155787	0.0166798	0.0323723	0.0123397	0.0207213	0.0211822	0.0200411	0.0176648	0.00211764	0.0204639	0.0105388	0.0206482	0.000574033
Stachydrine	Stachydrine	115244	HMDB0004827	144.102	8.77268	0.0285621	0.0196906	0.0284837	0.0713455	0.0753523	0.0640937	0.0547598	0.0693499	0.0666555	0.0255788	0.00509949	0.0702638	0.00570672	0.0635884	0.00776357
Stearic acid	Stearic acid	5281	HMDB0000827	283.265	15.1077	0.0140456	0.0119949	0.013717	0.0161183	0.012589	0.00997748	0.012249	0.00939295	0.00969446	0.0132525	0.00110147	0.0128949	0.00308181	0.0104455	0.00156918
Stearidonic acid	Stearidonic acid	5312508	HMDB0006547	275.202	13.2836	0.00319057	0.00209649	0.00111948	0.000626201	0.000688548	0.000670209	0.000302386	0.000366957	0.00053527	0.00213551	0.00103609	0.000661653	3.20417e-05	0.000401538	0.000120231
Stearoyl ethanolamide	Stearoyl ethanolamide	27902	HMDB0013078	328.321	14.3366	N.D.	0.000601599	0.000590918	0.00067851	0.000546491	0.000784226	0.000528642	0.000493338	0.00045924	0.000596258	7.55246e-06	0.000669742	0.00011911	0.00049374	3.47026e-05
Succinic acid	Succinic acid	1110	HMDB0000254	117.019	15.6336	0.00499378	0.00203943	0.00372638	0.00325533	0.00294714	0.00363237	0.00217855	0.00328075	0.00109291	0.00358653	0.00148213	0.00327828	0.000343189	0.00218407	0.00109393
Succinyladenosine	Succinyladenosine	165243	HMDB0000912	384.116	11.0854	0.000337183	0.000272558	0.000291151	0.000255726	0.000269069	0.000694111	0.000175017	0.000194016	0.000161687	0.000300297	3.32693e-05	0.000406302	0.00024934	0.000176907	1.62468e-05
Succinylcarnitine	Succinylcarnitine	71464481	HMDB0061717	262.129	7.61978	0.0001809	N.D.	0.000186146	0.000208261	0.000216085	0.000248858	0.000268317	0.000221371	0.000176528	0.000183523	3.70952e-06	0.000224401	2.15382e-05	0.000222072	4.58982e-05
Taurine	Taurine	1123	HMDB0000251	126.022	16.486	0.159664	0.115762	0.191653	0.197163	0.20624	0.222578	0.16351	0.19398	0.210059	0.155693	0.0381008	0.208661	0.0128792	0.189183	0.0236425
Tauro-α-muricholic acid-2 Tauro-β-muricholic acid-2	Tauro-a-muricholic acid Tauro-b-muricholic acid	101657566 168408	HMDB0258742 HMDB0000932	514.285	10.9333	0.000574528	0.00103123	0.000280617	0.000404998	0.000585919	0.000264937	9.54564e-05	0.000451311	0.000960208	0.000628793	0.000378239	0.000418618	0.000160924	0.000502325	0.000434627
Tauro-ω-muricholic acid-1 Tauro-α-muricholic acid-1 Tauro-β-muricholic acid-1	Tauro-omega-muricholic acid Tauro-a-muricholic acid Tauro-b-muricholic acid	118703092 101657566 168408	HMDB0258742 HMDB0000932	514.283	10.349	0.000137594	0.000182296	N.D.	0.000296703	0.000183	0.000259215	0.000118061	0.00019978	0.000924196	0.000159945	3.1609e-05	0.000246306	5.79403e-05	0.000414013	0.000443717
Tauro-ω-muricholic acid-2 Tauro-α-muricholic acid-3 Tauro-β-muricholic acid-3	Tauro-omega-muricholic acid Tauro-a-muricholic acid Tauro-b-muricholic acid	118703092 101657566 168408	HMDB0258742 HMDB0000932	514.285	10.6752	0.000566266	0.000666307	0.000237769	0.000847234	0.00122595	0.000697863	0.000307553	0.00118544	0.00183879	0.000490114	0.000224188	0.000923682	0.000272218	0.0011106	0.000768357
Taurochenodeoxycholic acid	Taurochenodeoxycholic acid	387316	HMDB0000951	498.29	12.4734	0.149823	0.218183	0.072906	0.0505086	0.0824293	0.0366364	0.0320989	0.0951765	0.141407	0.146971	0.0726806	0.0565248	0.0234817	0.0895608	0.05487
Taurocholic acid	Taurocholic acid	6675	HMDB0000036	514.284	11.6262	0.23111	0.279086	0.105615	0.183484	0.236995	0.143845	0.0563543	0.266088	0.489679	0.20527	0.0895755	0.188108	0.0467471	0.270707	0.216699
Taurodeoxycholic acid	Taurodeoxycholic acid	2733768	HMDB0000896	498.29	12.7543	0.000748189	N.D.	0.00019299	0.000887717	0.000490754	0.000640489	0.000590306	0.00169912	0.00687552	0.00047059	0.000392585	0.000672986	0.000200467	0.00305498	0.00335481
Taurolithocholic acid	Taurolithocholic acid	439763	HMDB0000722	482.296	13.4247	9.26299e-05	N.D.	N.D.	0.000124352	5.95782e-05	N.D.	0.00011987	6.56452e-05	0.000344147	9.26299e-05	N.A.	9.19651e-05	4.5802e-05	0.000176554	0.00014765
Terephthalic acid	Terephthalic acid	7489	HMDB0002428	165.019	13.2471	0.00031696	0.000275131	0.000259762	0.000188986	0.000213312	0.000224606	0.000135004	0.000167131	0.000192344	0.000283951	2.96013e-05	0.000208968	1.8203e-05	0.000164826	2.87393e-05
Tetradecanedioic acid	Tetradecanedioic acid	13185	HMDB0000872	257.176	11.0863	N.D.	0.00017896	N.D.	N.D.	5.33138e-05	0.0012929	9.4294e-05	N.D.	N.D.	0.00017896	N.A.	0.000673105	0.000876518	9.4294e-05	N.A.
Thiamine diphosphate	ThDP	1132	HMDB0001372	423.03	6.88624	N.D.	N.D.	N.D.	0.000104456	8.16026e-05	0.000119906	8.47006e-05	0.000118419	9.84557e-05	N.A.	N.A.	0.000101988	1.92706e-05	0.000100525	1.69544e-05
Thiaproline	Thiaproline	9934		134.027	10.6333	0.000187197	N.D.	N.D.	0.000279458	0.000171393	0.000250876	0.000175339	N.D.	0.000244093	0.000187197	N.A.	0.000233909	5.59944e-05	0.000209716	4.86168e-05
Thr	Thr	6288	HMDB0000167	120.065	8.09682	0.137005	0.112819	0.141149	0.431942	0.26381	0.369191	0.246743	0.204111	0.26959	0.130324	0.0153011	0.354981	0.0849622	0.240148	0.033234
threo-β-Methylaspartic acid	threo-b-Methylaspartic acid	440064		148.06	9.44259	0.000619982	N.D.	0.000378428	0.000372449	0.000457971	0.000466104	0.00055465	0.000571526	0.000501075	0.000499205	0.000170804	0.000432174	5.18835e-05	0.000542417	3.6784e-05
Threonic acid	Threonic acid	5460407	HMDB0000943	135.03	7.9626	0.000431232	0.000383579	0.00070099	0.000548241	0.000434069	0.00050569	0.000469233	0.00040173	0.000310085	0.000505267	0.000171167	0.000496	5.76999e-05	0.000393683	7.98789e-05
Trigonelline	Trigonelline	5570	HMDB0000875	138.054	8.05397	N.D.	N.D.	N.D.	0.000181139	0.000205488	0.000188997	0.000139949	0.000138462	N.D.	N.A.	N.A.	0.000191875	1.24268e-05	0.000139206	1.05144e-06
Trimethylamine	Trimethylamine	1146	HMDB0000906	60.0805	4.60313	N.D.	N.D.	N.D.	N.D.	N.D.	N.D.	0.000215554	0.000481883	N.D.	N.A.	N.A.	N.A.	N.A.	0.000348719	0.000188323
Trimethylamine N-oxide	Trimethylamine N-oxide	1145	HMDB0000925	76.0754	5.14081	N.D.	N.D.	N.D.	0.00106649	N.D.	N.D.	N.D.	N.D.	N.D.	N.A.	N.A.	0.00106649	N.A.	N.A.	N.A.
Trp	Trp	1148	HMDB0000929	205.097	8.4434	0.00509954	0.00324814	0.00410066	0.00606234	0.00212767	0.00778925	0.00229678	0.00464207	0.00240696	0.00414944	0.000926663	0.00532642	0.00290165	0.00311527	0.0013234
Tyr	Tyr	1153	HMDB0000158	182.081	8.69253	0.0263352	0.0180208	0.0186848	0.0267277	0.00870374	0.034415	0.0150756	0.0307416	0.0207882	0.0210136	0.00462059	0.0232821	0.0131974	0.0222018	0.00792809
UDP	UDP	6031	HMDB0000295	402.995	9.76735	0.00022771	N.D.	0.000258538	N.D.	0.000108804	N.D.	N.D.	N.D.	9.64257e-05	0.000243124	2.17987e-05	0.000108804	N.A.	9.64257e-05	N.A.
UDP-galactose UDP-glucose	UDP-Gal UDP-Glc	23724458 8629	HMDB0000302 HMDB0000286	565.048	7.43842	0.00202437	0.00181198	0.0023138	0.00474519	0.0087017	0.00052915	0.00419407	0.00433869	0.00653512	0.00205005	0.000251892	0.00465868	0.00408696	0.00502263	0.00131185
UDP-glucuronic acid	UDP-glucuronic acid	17473	HMDB0000935	579.027	9.33434	0.00772964	0.0040451	0.00691325	0.00570612	0.00626508	0.00542966	0.00575865	0.00548649	0.00751435	0.00622933	0.00193514	0.00580028	0.000425596	0.00625316	0.00110067
UDP-N-acetylglucosamine UDP-N-acetylgalactosamine	UDP-GlcNAc UDP-N-acetylgalactosamine	445675 23724461	HMDB0000290 HMDB0000304	606.074	7.28057	0.00261367	0.00182422	0.0031673	0.00367074	0.00397677	0.00223955	0.00292356	0.003206	0.00266236	0.00253506	0.000674982	0.00329569	0.000927353	0.00293064	0.00027189
UMP	UMP	6030	HMDB0000288	323.029	8.35361	0.00547339	0.00322646	0.00392987	0.00608017	0.00491964	0.00576287	0.0039342	0.00485716	0.00550641	0.0042099	0.00114935	0.00558756	0.0005998	0.00476592	0.000790065
Uracil	Uracil	1174	HMDB0000300	113.035	16.5185	N.D.	0.000397872	N.D.	N.D.	0.000302703	0.000581789	0.000436578	N.D.	0.000200742	0.000397872	N.A.	0.000442246	0.000197344	0.00031866	0.000166761
Urea	Urea	1176	HMDB0000294	61.0395	15.8493	0.0674452	0.0441888	0.0525449	0.0455574	0.0299948	0.0708767	0.0331162	0.0431472	0.0327464	0.0547263	0.0117806	0.0488096	0.0206341	0.0363366	0.00590107
Uric acid	Uric acid	1175	HMDB0000289	167.021	7.65548	0.000741518	0.000168792	0.000584362	0.00230286	0.00164093	0.00171257	0.00180019	0.00157221	0.00113351	0.000498224	0.00029592	0.00188545	0.000363253	0.00150197	0.000338843
Uridine	Uridine	6029	HMDB0000296	245.077	16.5382	0.00274899	0.00329513	0.00426362	0.00180703	0.0022963	0.00275492	0.00293669	0.00266614	0.00166413	0.00343591	0.00076707	0.00228609	0.000474029	0.00242232	0.000670399
Val	Val	1182	HMDB0000883	118.086	7.68546	0.0762274	0.0561294	0.0657251	0.0842345	0.0302122	0.14095	0.0721769	0.0668264	0.0449198	0.0660273	0.0100524	0.0851321	0.0553742	0.0613077	0.0144423
Xanthine	Xanthine	1188	HMDB0000292	153.041	14.7574	0.00234826	0.0022356	0.00185805	0.00375064	0.00276165	0.00551119	0.00424031	0.00397543	0.00372545	0.0021473	0.000256757	0.00400783	0.0013927	0.0039804	0.000257463
Xanthosine	Xanthosine	64959	HMDB0000299	283.07	6.60528	N.D.	N.D.	N.D.	N.D.	N.D.	N.D.	N.D.	9.29439e-05	N.D.	N.A.	N.A.	N.A.	N.A.	9.29439e-05	N.A.
Zeaxanthin	Zeaxanthin	5280899	HMDB0002789	569.432	14.7917	0.00055794	N.D.	0.000297589	0.000878071	0.000385652	0.000625786	0.000144256	N.D.	0.000721053	0.000427765	0.000184096	0.000629836	0.000246234	0.000432654	0.000407857
α-Tocopherol	a-Tocopherol	14985	HMDB0001893	431.387	16.1599	0.0131102	0.00670459	0.00560855	0.0163359	0.00850643	0.00584155	0.00139462	0.0103011	0.010216	0.00847446	0.00405193	0.010228	0.00545486	0.00730391	0.00511777
β-Ala	b-Ala	239	HMDB0000056	90.0548	5.70663	0.10124	0.150367	0.138916	0.0666126	0.0228538	0.113807	0.0215651	0.0342158	0.0233166	0.130174	0.0257036	0.0677577	0.0454872	0.0263658	0.00685445
β-Ala-Lys	b-Ala-Lys	440638		218.15	5.26093	0.000210668	0.00017168	0.000159553	0.000387463	0.000304085	0.000217919	0.000184669	0.000330374	0.000333529	0.000180634	2.67076e-05	0.000303156	8.4776e-05	0.000282857	8.50484e-05
β-Cryptoxanthin-1	b-Cryptoxanthin	5281235	HMDB0033844	553.436	16.5712	0.0016552	0.000727528	0.000994397	0.00626154	0.00319605	0.00305662	0.0024448	0.00639663	0.00528962	0.00112571	0.000477575	0.0041714	0.00181145	0.00471035	0.0020386
β-Cryptoxanthin-2	b-Cryptoxanthin	5281235	HMDB0033844	553.437	16.4656	0.00037123	N.D.	N.D.	0.00075716	0.000374389	0.000373238	N.D.	0.000770248	0.00121658	0.00037123	N.A.	0.000501596	0.000221326	0.000993412	0.000315601
β-Hydroxyisovaleric acid-1	b-Hydroxyisovaleric acid	69362	HMDB0000754	117.055	7.88695	N.D.	N.D.	N.D.	N.D.	N.D.	N.D.	8.35076e-05	9.2384e-05	0.000187015	N.A.	N.A.	N.A.	N.A.	0.000120969	5.73696e-05
β-Hydroxyisovaleric acid-2 2-Hydroxyvaleric acid 2-Hydroxyisovaleric acid	b-Hydroxyisovaleric acid 2-Hydroxyvaleric acid 2-Hydroxyisovaleric acid	69362 98009 99823	HMDB0000754 HMDB0001863 HMDB0000407	117.055	7.99098	0.000245644	0.000221539	0.000316037	0.000256007	0.000310949	0.000421843	0.000338206	0.000278832	0.000261364	0.000261073	4.91019e-05	0.0003296	8.44766e-05	0.000292801	4.02803e-05
γ-Butyrobetaine	g-Butyrobetaine	134	HMDB0001161	146.118	6.26986	0.0034577	0.00608336	0.00816996	0.011697	0.0160248	0.0100969	0.0230279	0.0224591	0.0214392	0.00590367	0.00236126	0.0126062	0.00306677	0.0223088	0.000804968
γ-Carboxyglutamic acid	g-Carboxyglutamic acid	40772	HMDB0041900	192.05	10.9313	N.D.	N.D.	N.D.	N.D.	N.D.	N.D.	0.000126759	N.D.	7.34233e-05	N.A.	N.A.	N.A.	N.A.	0.000100091	3.77138e-05
γ-Glu-Ala	g-Glu-Ala	440103	HMDB0006248	219.099	9.40283	0.000452249	N.D.	0.000258422	N.D.	N.D.	0.000327551	0.000252874	0.000212113	0.000210897	0.000355335	0.000137056	0.000327551	N.A.	0.000225294	2.38924e-05
γ-Glu-Asn	g-Glu-Asn	131801686	HMDB0029144	262.103	9.82814	0.000216393	0.000359024	0.000396838	0.000206324	0.000376881	0.000219936	0.000194642	0.000256303	0.000239407	0.000324085	9.51615e-05	0.000267714	9.47863e-05	0.000230117	3.18626e-05
γ-Glu-Cys	g-Glu-Cys	123938	HMDB0001049	251.07	9.7927	0.000443089	N.D.	N.D.	0.000413132	0.000117027	0.00050915	0.0002577	0.000507976	0.000237064	0.000443089	N.A.	0.000346436	0.000204393	0.000334247	0.000150808
γ-Glu-Gln	g-Glu-Gln	150914	HMDB0011738	276.119	9.95688	0.000241009	0.000432333	0.000312288	N.D.	N.D.	N.D.	0.000178234	0.000255882	0.000242531	0.000328543	9.66925e-05	N.A.	N.A.	0.000225549	4.1516e-05
γ-Glu-Glu	g-Glu-Glu	92865	HMDB0011737	277.105	9.98572	N.D.	N.D.	N.D.	N.D.	N.D.	N.D.	0.000108099	N.D.	N.D.	N.A.	N.A.	N.A.	N.A.	0.000108099	N.A.
γ-Glu-Gly	g-Glu-Gly	165527	HMDB0011667	205.082	9.21616	0.000905643	0.000828952	0.00101119	0.000547776	0.000762977	0.000589188	0.000481297	0.000757124	0.000663153	0.00091526	9.14976e-05	0.000633314	0.000114185	0.000633858	0.000140228
γ-Glu-Met	g-Glu-Met	7009567	HMDB0034367	279.1	9.89275	N.D.	N.D.	N.D.	0.000225697	0.000166325	N.D.	N.D.	N.D.	N.D.	N.A.	N.A.	0.000196011	4.19823e-05	N.A.	N.A.
γ-Glu-Ser	g-Glu-Ser	22844748	HMDB0029158	235.093	9.60456	N.D.	N.D.	N.D.	0.00024168	N.D.	N.D.	0.000158931	0.000208746	0.000193713	N.A.	N.A.	0.00024168	N.A.	0.00018713	2.55514e-05
γ-Glu-Taurine	g-Glu-Taurine	68759	HMDB0004195	253.05	6.98952	0.000830768	0.000398771	0.000680192	0.000730586	0.000920821	0.000913631	0.000600857	0.00105906	0.00114975	0.000636577	0.000219276	0.000855013	0.000107817	0.000936554	0.000294237
γ-Glu-Thr	g-Glu-Thr	53861142	HMDB0029159	249.108	9.70769	0.00121306	0.000511907	0.000680489	0.00209036	0.00150937	0.00261973	0.0020809	0.0018623	0.0019008	0.000801818	0.000365983	0.00207315	0.000555383	0.001948	0.000116695
N.D.: Not Detected.
N.A.: Not Available. Calculation was impossible due to insufficient data.
FA denotes fatty acids, AC denotes acylcarnitine, and the numbers in parentheses indicate the number of carbon atoms and the number of double bonds.

## Sheet: S2
Supplementary Table 2: Metabolites whose levels were significantly changed.
Young vs Adult (36)	Young vs Old (54)	Adult vs Old (17)
2-Aminoisobutyric acid 2-Aminobutyric acid	Creatine	Creatine
Pyridoxamine 5'-phosphate	Homocitrulline	Homocitrulline
Stachydrine	Arabinonic acid-2	Arabinonic acid-2
1-Methylhistidine 3-Methylhistidine	γ-Butyrobetaine	γ-Butyrobetaine
N-Methylglutamic acid	LPC(24:0)	Ectoine
Hypotaurine	Isoglutamic acid	LPC(24:0)
N-Acetylthreonine-2	Glutarylcarnitine	Isoglutamic acid
ADMA	Retinol	Glutarylcarnitine
Phytosphingosine	1-Methylhistidine 3-Methylhistidine	N-Oleoyltaurine
Ectoine	Oleamide-1	Retinol
N5-Ethylglutamine	Pipecolic acid	1-Methylhistidine 3-Methylhistidine
2-Aminoethylphosphonic acid	Oleamide-2	Oleamide-1
N-Oleoyltaurine	p-Toluic acid o-Toluic acid	Pipecolic acid
Thr	N-Methylalanine	Oleamide-2
FAD_divalent	Asn	p-Toluic acid o-Toluic acid
Isonicotinamide Nicotinamide	Ethylmalonic acid	N-Methylalanine
Uric acid	N5-Ethylglutamine	2-Aminoethylphosphonic acid
Glutarylcarnitine	N-Acetylornithine
Monoethyl phosphate	2-Aminoisobutyric acid 2-Aminobutyric acid
3-Aminobutyric acid	Guanosine
Betaine aldehyde_+H2O	Adenosine
N-Acetyllysine Ile-Gly	Inosine
Pantothenic acid	Terephthalic acid
Acylcarnitine(18:1)	3-Aminobutyric acid
Campesterol	N,N-Dimethylglycine
γ-Glu-Thr	Glycerol
Hydroxyproline	Pelargonic acid
γ-Butyrobetaine	β-Ala
Sarcosine	Pyridoxamine 5'-phosphate
Terephthalic acid	Gly
Hercynine	Uric acid
6-Phosphogluconic acid	N-Acetylthreonine-2
2-Methylserine	Stachydrine
Oleic acid	3-Aminoisobutyric acid
Cholesterol sulfate	Ricinoleic acid-2
Adenine	Oleic acid
	Ne-(1-carboxyethyl)lysine
	N-Methylglutamic acid
	ADMA
	SDMA
	cis-5,8,11,14,17-Eicosapentaenoic acid
	Phytosphingosine
	Hydroxyproline
	Stearidonic acid
	Hypotaurine
	Campesterol
	γ-Glu-Thr
	Adenine
	2-Methylserine
	Monoethyl phosphate
	Pantothenic acid
	Betaine aldehyde_+H2O
	N-Acetyllysine Ile-Gly
	FAD_divalent

## Sheet: S3
Supplementary Table 3: Metabolites belonging to each part of the Venn diagram related to Supplementary Fig.1.
A=7	B=3	C=23	D=3	E=11	F=17
6-Phosphogluconic acid	2-Aminoethylphosphonic acid	2-Aminoisobutyric acid 2-Aminobutyric acid	1-Methylhistidine 3-Methylhistidine	Arabinonic acid-2	3-Aminoisobutyric acid
Acylcarnitine(18:1)	Ectoine	2-Methylserine	Glutarylcarnitine	Creatine	Adenosine
Cholesterol sulfate	N-Oleoyltaurine	3-Aminobutyric acid	γ-Butyrobetaine	Homocitrulline	Asn
Hercynine		ADMA		Isoglutamic acid	Ethylmalonic acid
Isonicotinamide Nicotinamide		Adenine		LPC(24:0)	Gly
Sarcosine		Betaine aldehyde_+H2O		N-Methylalanine	Glycerol
Thr		Campesterol		Oleamide-1	Guanosine
		FAD_divalent		Oleamide-2	Inosine
		Hydroxyproline		Pipecolic acid	N,N-Dimethylglycine
		Hypotaurine		Retinol	N-Acetylornithine
		Monoethyl phosphate		p-Toluic acid o-Toluic acid	Ne-(1-carboxyethyl)lysine
		N-Acetyllysine Ile-Gly			Pelargonic acid
		N-Acetylthreonine-2			Ricinoleic acid-2
		N-Methylglutamic acid			SDMA
		N5-Ethylglutamine			Stearidonic acid
		Oleic acid			cis-5,8,11,14,17-Eicosapentaenoic acid
		Pantothenic acid			β-Ala
		Phytosphingosine
		Pyridoxamine 5'-phosphate
		Stachydrine
		Terephthalic acid
		Uric acid
		γ-Glu-Thr

## Sheet: S4
Supplementary Table 4: 10,947 genes used for RNA-seq analysis.
Row-names	Symbol	Middle-Young___log2FoldChange	Middle-Young___padj	Old-Young___log2FoldChange	Old-Young___padj	Old-Middle___log2FoldChange	Old-Middle___padj	data	Young1	Young2	Young3	Middle1	Middle2	Middle3	Old1	Old2	Old3
ENSNFUG00015020115	CPB1	5.25894	1.35789e-08	-0.84252	0.669008	-6.10146	1.33691e-11		4.46669	4.53712	5.82435	11.3516	7.42436	9.43304	4.04218	4.57707	4.46059
ENSNFUG00015014875	OLA.16268	4.87911	5.16213e-07	-1.58162	0.332211	-6.46074	1.33691e-11		3.70658	4.58069	5.96804	10.898	7.29916	9.09552	3.92858	3.55175	3.86776
CTRL	NA	5.22173	7.29805e-08	-0.98511	0.604166	-6.20684	1.72448e-11		5.07697	5.96263	7.7997	13.0264	9.31653	11.2964	5.91015	5.65424	5.83272
ELA2	NA	5.03653	1.35789e-08	-0.408997	0.848955	-5.44553	1.05304e-10		6.5432	7.24834	8.36468	13.685	10.0287	12.0691	7.69583	6.73683	6.93904
APODA.2	NA	4.75438	1.35789e-08	-0.316934	0.885737	-5.07131	2.39123e-10		4.54872	4.4922	5.82435	10.6861	7.49029	9.32977	5.13695	4.43705	4.82664
CTRC	NA	4.74585	9.58596e-07	-1.05398	0.566668	-5.79983	2.39123e-10		4.96192	5.52335	6.86721	11.8389	8.11878	9.92082	5.64836	4.28197	4.93057
CPA1	NA	5.22761	2.91908e-08	-0.293459	0.906523	-5.52107	8.32458e-10		5.54504	5.80626	7.69514	12.9877	9.27349	11.2633	6.81416	6.17867	6.14509
ENSNFUG00015015179	Nfu_g_1_006847	4.13107	3.92893e-06	-1.02535	0.544147	-5.15642	1.0936e-09		4.54872	5.56732	5.80534	10.4375	7.05961	9.00903	4.14748	3.91058	5.16172
CELA1	NA	5.12762	5.96826e-08	-0.327458	0.894622	-5.45508	1.0985e-09		6.67689	7.09154	8.72733	14.0431	10.2875	12.1821	8.06186	6.94503	7.13671
ENSNFUG00015003606	OLA.3677	5.05796	1.35789e-08	0.00401981	0.998427	-5.05394	1.29305e-09		6.32777	6.80975	7.54279	13.1161	9.18114	11.4492	7.47084	6.51101	6.80872
PLA2G1B	NA	4.71152	8.41776e-07	-0.715639	0.733655	-5.42716	1.48128e-09		5.23399	5.43116	7.02343	11.9396	8.18664	9.99285	5.87991	4.82194	5.53588
LEG1.1	NA	-2.61645	0.000391731	-7.04963	6.52671e-25	-4.43318	1.50163e-09		9.56888	9.58975	10.0998	6.85278	7.71525	6.81519	2	2.87017	4.31455
CTRB.3	NA	5.00606	1.35789e-08	-0.00819682	0.995894	-5.01425	2.21295e-09		5.32991	6.21845	7.03164	12.3986	8.71377	10.7492	6.8458	5.96586	6.07877
PRSS1	NA	5.08262	6.29441e-07	-0.595806	0.800845	-5.67843	2.33109e-09		6.41784	7.43199	9.37537	14.4365	10.8702	12.7403	8.35356	6.83774	7.43944
ELA3L	NA	5.00198	1.88064e-07	-0.0361293	0.990671	-5.03811	4.91589e-08		4.37971	4.98906	6.40684	11.4798	8.03291	9.86976	6.27799	4.7645	4.93057
PDIA2	NA	5.22587	2.32609e-07	-0.226841	0.943147	-5.45271	6.62419e-08		2.40426	3.04797	3.77005	8.77761	5.40509	6.95239	2.95278	3.25084	3.04255
CEL.1	NA	6.06639	6.10648e-08	0.336068	0.915508	-5.73032	1.32036e-07		2.40426	2.61712	4.05395	9.6932	5.91221	7.87238	4.04218	2.87017	3.21712
VMO1B	NA	4.90849	2.23477e-06	-0.335521	0.90611	-5.24401	1.92279e-07		2.71968	3.47476	4.83175	9.58961	6.11157	7.78933	4.14748	3.55175	3.37284
ENSNFUG00015023788	GADD45BA	-1.07854	1	3.46493	0.000134218	4.54347	2.60833e-07		5.07697	2.77547	4.23533	3.20385	3.22565	3.92936	8.10171	6.08794	7.48283
ENSNFUG00015016467	CEBPD	-0.187618	1	2.95528	6.86503e-06	3.14289	1.53826e-06		5.18352	4.53712	4.11698	3.9515	3.9636	5.20046	7.70449	7.66314	6.5721
SLC13A5	NA	3.18723	0.00327726	5.74239	3.40348e-13	2.55516	1.82029e-06		2.97836	2.43922	2.24542	4.2172	3.9636	4.67439	6.76536	6.76639	6.22903
ENSNFUG00015002448	FTL	-0.420152	1	1.56022	0.000561371	1.98037	2.72316e-06		10.4403	10.2472	9.67148	9.58374	9.34056	10.158	12.0169	11.3296	11.7063
SLC25A25A	NA	-2.48105	0.172882	1.9935	0.0743438	4.47455	3.05688e-06		5.76691	4.62297	3.07903	2.83359	3.08101	3.2657	7.10306	6.94503	5.53588
CEL	NA	5.55154	1.46188e-06	0.35428	0.915976	-5.19726	4.45178e-06		2.40426	2.43922	3.20041	8.09302	4.71755	6.60924	3.52165	2.35158	2.61347
ENSNFUG00015005973	CDKN1A	-0.786834	1	2.66098	0.00068185	3.44781	4.76255e-06		5.62285	3.47476	4.29106	4.13395	4.04385	4.01541	7.7964	6.66018	6.72447
ENSNFUG00015004780	HTRA1B	5.91928	5.84123e-05	8.54778	1.08914e-11	2.6285	3.58532e-05		2.40426	2.23626	2	4.69484	4.61621	6.03991	7.73014	8.10035	7.41277
ENSNFUG00015022971	CYP1A	2.22576	3.8499e-05	0.13294	0.925716	-2.09282	0.000100366		4.37971	5.25414	5.04124	6.82651	7.03036	7.21129	4.58252	4.7645	5.63151
GATM	NA	1.67868	0.792207	-2.70298	0.055622	-4.38166	0.000170789		3.19764	4.66405	5.07338	5.54708	6.50086	5.84219	2	2	3.64142
ENSNFUG00015015773	CEBPB	-1.42471	0.665617	1.41829	0.151703	2.84299	0.000313171		7.01662	6.08868	4.86885	4.91029	4.56273	5.23674	8.22111	7.56563	6.55594
APOBB.1	NA	1.19387	0.130774	-0.590314	0.467335	-1.78419	0.000340683		6.92743	6.88986	7.44177	8.19921	8.23016	8.40596	5.91015	6.28461	7.13671
ENSNFUG00015023495	EEF2	-1.26315	0.0957638	0.506291	0.557451	1.76944	0.000473754		10.1348	8.94328	8.9274	8.20941	8.14631	8.24163	10.1395	10.0307	9.6514
ENSNFUG00015013486	TPRA1	0.968362	0.665617	-0.992619	0.21051	-1.96098	0.000949805		5.07697	5.1993	5.96804	6.36128	6.42797	6.36891	4.04218	4.50876	5.07365
ENSNFUG00015001750	MTP	0.82466	1	-2.80305	0.0174621	-3.62771	0.000949805		2.97836	5.56732	5.04124	5.61004	5.99529	5.20046	2.39162	2.87017	3.37284
ENSNFUG00015003599	IER2	-0.895522	1	2.22883	0.0227463	3.12435	0.000955972		4.69999	3.16708	4.49464	3.74259	3.08101	3.83786	7.07664	5.68552	5.16172
FURINA	NA	1.56519	0.0723969	-0.615203	0.608914	-2.18039	0.00106448		3.96742	4.44584	4.90501	6.1013	5.52178	6.01923	3.52165	3.91058	4.46059
CORO1C	NA	0.976846	1	-1.67853	0.087978	-2.65538	0.00129998		3.38794	4.62297	5.04124	5.48124	5.46462	5.20046	3.1683	3.25084	3.51337
DNASE1	NA	4.55266	0.00151787	-0.178342	0.970026	-4.731	0.00138898		2.40426	2.43922	2.63813	6.44999	3.47758	5.00399	2	2.63405	2.61347
GANAB	NA	0.802019	1	-1.65472	0.0634581	-2.45674	0.00138898		3.84289	4.62297	5.00837	5.26353	5.34301	5.27213	3.52165	2.87017	3.64142
SQSTM1	NA	-0.332236	1	1.93471	0.00660472	2.26695	0.00138898		6.01794	4.66405	5.00837	5.00703	4.5072	5.4371	7.68713	7.10396	6.38353
ENSNFUG00015011674	RPLP0	-2.10921	0.0504397	0.454925	0.781974	2.56414	0.00153821		12.4172	9.91098	10.3375	9.21996	9.19878	9.26537	12.2491	11.7858	11.0928
ANXA2B	NA	0.566665	1	2.37874	5.2014e-06	1.81208	0.00153821		4.08205	4.95636	4.58659	5.183	5.0249	5.08582	7.17955	6.87891	6.10122
AACS	NA	0.183315	1	-4.06786	0.00183867	-4.25118	0.00157017		2.97836	7.07641	7.13423	7.39889	6.81857	5.30666	3.80526	2.35158	3.21712
SQLEA	NA	-0.769994	1	-4.63809	3.22803e-05	-3.8681	0.00169329		3.70658	7.25508	7.54279	6.70198	6.31931	4.82495	3.35577	2.87017	3.04255
ENSNFUG00015013178	ANXA5B	-0.130633	1	1.48435	0.0032572	1.61498	0.00175786		6.62111	6.17648	5.60005	6.16559	5.89068	6.10022	8.00694	7.52298	7.19004
ENSNFUG00015003910	FDFT1 ENSNFUG00015003910	-0.61029	1	-4.09678	5.97864e-05	-3.48649	0.00175786		5.98885	9.23671	8.64418	8.45211	8.06691	6.41713	4.65575	3.07302	5.3232
ENSNFUG00015002052	NSDHL ENSNFUG00015002052	-1.27919	1	-5.18024	4.08551e-06	-3.90105	0.00227341		4.62633	7.97141	6.77251	6.18639	6.27011	4.01541	3.1683	2.87017	2.61347
ENDOU	NA	4.7651	0.00349642	-0.932805	0.833914	-5.69791	0.00234995		2.40426	2.23626	2.63813	6.43268	3.22565	5.00399	2	2	2.61347
ENSNFUG00015023562	HSD11B1L	0.318697	1	-1.18117	0.0243296	-1.49987	0.00234995		6.18116	6.86365	6.84876	6.94113	7.12563	6.86239	5.08488	5.58957	5.8854
RPS9	NA	-2.67064	0.0491668	0.462355	0.833914	3.133	0.00238226		11.0054	7.83865	7.97154	7.04732	7.10708	7.10737	10.9004	10.0092	9.08887
U3	NA	-2.57169	0.704447	1.96279	0.114792	4.53448	0.00242665		2	3.87541	3.20041	2.33423	2.53227	2	4.85546	4.7645	4.46059
ENSNFUG00015021065	ITIH1	1.65447	0.0341144	-0.189714	0.894	-1.84419	0.00321927		8.2049	8.90737	9.21715	10.3434	10.5487	10.5464	7.7964	8.24908	9.40304
ENSNFUG00015017956	EDEM1	0.592873	1	-2.79898	0.0205072	-3.39185	0.00321927		2.97836	5.71147	4.79367	5.61004	5.54954	5.04549	2.39162	2.87017	3.37284
ENSNFUG00015020335	EIF3F	-0.405798	1	0.846079	0.0806363	1.25188	0.00385203		8.41633	7.60019	7.67957	7.58277	7.54646	7.49952	8.97079	8.75953	8.57482
RPL5	NA	-1.1806	0.621946	0.803523	0.42458	1.98412	0.00397208		10.28	8.59855	8.68115	8.31239	8.20421	8.1963	10.6069	10.2943	9.52012
ENSNFUG00015008714	ATPV0E1	-0.70513	0.742423	0.55595	0.362826	1.26108	0.00406888		7.83162	7.20028	7.54279	7.01278	6.8412	6.70298	8.23312	8.29036	7.66714
ENSNFUG00015021159	CP	1.92306	0.133083	-0.512968	0.755237	-2.43603	0.00411116		7.08694	8.79628	9.65299	11.0434	10.3657	10.8114	7.66069	7.71711	9.13583
ENSNFUG00015018029	GNPDA2	-1.79859	0.186559	0.549259	0.663693	2.34785	0.00445936		5.23399	4.34839	3.98804	3.49822	3.08101	3.2657	5.32828	4.87717	4.93057
ENSNFUG00015014462	RPL15	-1.42068	0.496362	0.792578	0.519619	2.21325	0.00445936		11.6218	9.41576	9.785	9.24249	9.20315	9.16306	11.9087	11.3651	10.7094
GDA	NA	-0.402978	1	1.57083	0.0319539	1.97381	0.00445936		7.07315	6.51641	5.98503	6.20691	6.13007	6.26736	8.59143	8.40755	6.7531
CCDC57	NA	0.403007	1	-3.63175	0.0114783	-4.03476	0.00445936		2.71968	4.66405	5.60005	5.78394	4.76568	4.44556	2.39162	2.35158	2.8439
ENSNFUG00015001702	NAP1L1	-0.140898	1	1.4278	0.0102086	1.5687	0.00445936		8.65263	7.36506	7.6479	7.81429	7.71525	8.02019	9.66153	9.50145	8.97497
TMEM86B	NA	-0.742134	1	-2.80408	6.3378e-06	-2.06195	0.00445936		5.83388	6.80975	6.82064	5.67036	6.23635	5.58513	3.1683	4.28197	4.46059
ENSNFUG00015005900	CU929036.1	0.278213	1	-2.14659	0.0147662	-2.42481	0.00477763		3.84289	4.95636	5.30756	5.14098	5.24457	4.87184	2.95278	3.25084	3.51337
ENSNFUG00015003221	CYP46A1	0.986233	0.510092	-0.610128	0.491681	-1.59636	0.00483702		5.23399	5.80626	5.82435	6.44999	6.61033	6.68995	4.58252	4.82194	5.66203
ENSNFUG00015023007	MTHFD1A	0.73209	0.889201	-0.703948	0.327652	-1.43604	0.00573228		5.62285	6.16221	6.3685	6.62786	6.81857	6.9193	5.03085	5.33723	5.83272
ENSNFUG00015001123	HPRT1 ENSNFUG00015001123	-0.787767	0.208039	0.233658	0.7287	1.02143	0.00649032		7.21808	6.83695	7.05597	6.18639	6.30309	6.35248	7.33253	7.19372	7.27147
RACK1	NA	-1.42561	0.621946	0.877958	0.493823	2.30356	0.00649032		11.9409	9.64594	9.78863	9.48011	9.38553	9.48108	12.2999	11.7027	10.9166
BRD2A	NA	-1.56537	0.704447	1.02613	0.391886	2.5915	0.00650236		4.62633	4.07137	3.77005	3.03057	3.08101	3.2657	5.64836	5.03121	3.96887
ENSNFUG00015019199	LAMTOR4	-0.943971	0.926598	0.86449	0.332211	1.80846	0.00650236		7.30326	6.02703	6.26098	5.69961	5.80115	5.71938	8.08192	7.1828	6.86227
ENSNFUG00015022051	PTS	-0.13062	1	1.54908	0.012512	1.6797	0.00708716		7.73856	6.60346	6.2185	6.78618	6.93888	6.87395	8.90474	8.43542	8.0826
ENSNFUG00015019852	PNP4B	-0.326079	1	1.26028	0.0438104	1.58636	0.00728167		10.3503	9.12161	8.96857	9.34089	9.23982	9.30435	11.214	10.8744	10.4357
ENSNFUG00015013919	HYOU1	-0.397071	1	-2.8271	0.000553172	-2.43003	0.00769324		4.46669	6.79132	5.93343	5.83754	5.80115	5.27213	3.52165	3.55175	3.86776
SLC22A2	NA	-0.610816	1	-2.37021	2.27775e-05	-1.75939	0.00771922		6.01794	5.73093	5.70634	4.95947	5.57677	5.16325	3.67042	3.55175	4.15204
FGF19	NA	6.57556	0.000218149	8.86211	4.61404e-09	2.28655	0.0081165		2	2	2	3.49822	3.58877	5.12505	6.43183	6.26403	6.22903
ENSNFUG00015012205	RPS3A	-1.50961	0.445292	0.668218	0.623907	2.17782	0.0081165		11.3147	9.0498	9.33119	8.79126	8.87602	8.64741	11.4484	10.9104	10.209
ENSNFUG00015016427	TOMM70A	0.460759	1	-1.76065	0.0519938	-2.22141	0.00816873		3.70658	5.14229	5.38643	5.22383	5.49348	5.30666	3.35577	3.40912	3.86776
CYP51	NA	-0.730574	1	-3.28723	0.000122628	-2.55666	0.00830058		6.94269	9.10679	8.59798	8.23461	8.05728	6.28479	5.28277	4.1977	5.96098
ENSNFUG00015017130	YKT6	0.0140585	1	-3.35734	0.00660472	-3.37139	0.00865043		2.97836	6.28581	5.95084	5.88923	6.09283	4.50626	2.69931	2.87017	3.51337
AGXTA	NA	0.773501	0.0341144	1.56104	3.9103e-11	0.78754	0.00866963		10.4132	10.495	10.3158	11.2322	10.9557	11.3314	11.9858	12.0151	11.9012
GADL1	NA	-1.2542	0.347717	-3.15351	6.04615e-08	-1.89931	0.00866963		6.8159	6.56059	7.65323	6.12305	6.07384	5.37336	3.67042	4.10819	4.71464
RPS3	NA	-1.4422	0.536891	0.710408	0.590953	2.1526	0.00866963		10.549	8.34113	8.61991	8.15767	8.12802	8.00449	10.796	10.1363	9.47356
KRT94	NA	0.844993	0.170952	1.83111	4.0799e-09	0.986121	0.00868422		5.83388	6.11854	6.27487	6.92884	6.74845	7.02679	7.9858	7.86789	7.74047
UCP1	NA	1.10849	0.944397	3.20308	2.30587e-06	2.09458	0.00868422		8.43802	6.68556	6.1448	8.39068	8.18221	8.89732	10.9163	10.7073	10.0594
ENSNFUG00015010074	CALCA	0.924725	1	2.91189	8.75952e-06	1.98717	0.00921068		6.5432	5.84251	4.34471	6.7447	6.48658	6.82713	9.02015	8.78503	7.87682
ENSNFUG00015016153	PODXL	0.745206	1	-2.96125	0.0574149	-3.70646	0.00960903		3.19764	3.80369	3.84643	4.37053	4.19208	4.0966	2	2.35158	2.61347
RDH12	NA	-0.417501	1	-2.51196	0.000553172	-2.09446	0.0099962		5.95916	7.55176	8.10579	7.45141	7.22364	6.19546	5.08488	4.82194	5.3232
ENSNFUG00015011783	AQP9	0.487787	1	-1.72601	0.0648683	-2.2138	0.0107246		4.77006	5.89522	6.96468	6.7447	6.61033	6.47901	3.67042	4.64229	5.11836
DDX21	NA	-0.420458	1	1.03185	0.0983065	1.45231	0.0107501		6.78238	5.67173	5.95084	5.86362	5.75422	5.79431	7.47084	7.26793	6.73886
ENSNFUG00015024306	SGK1	-0.84333	1	2.11344	0.0893593	2.95677	0.0107501		5.28274	3.80369	3.31237	3.35853	3.08101	4.3822	7.0223	6.17867	4.5932
WDR70	NA	1.50646	0.578545	3.43717	1.03979e-06	1.93071	0.0112596		2.97836	3.37931	3.41626	4.37053	4.32649	4.3822	6.60822	6.20049	4.93057
STX5A	NA	0.431192	1	-2.34204	0.0407935	-2.77324	0.011506		3.19764	6.02703	4.79367	5.44716	5.70571	5.30666	3.35577	2.87017	3.64142
FAH	NA	1.00016	0.00225303	1.80899	3.5327e-13	0.808832	0.0117058		8.02314	8.03934	7.73587	8.79804	8.88422	9.08063	9.74779	9.77666	9.66277
COPA	NA	0.609947	1	-1.25668	0.146075	-1.86662	0.0117058		4.28715	5.86029	5.91582	6.20691	6.30309	5.76976	4.65575	4.50876	4.15204
ENSNFUG00015011779	RPS10	-1.78611	0.393486	0.6141	0.721761	2.40021	0.0126952		10.4268	7.64191	8.03819	7.59838	7.53956	7.33357	10.4537	9.8371	8.93179
ENSNFUG00015007955	RPL9	-1.32786	0.597703	0.654343	0.608914	1.9822	0.0126952		10.6707	8.54457	8.84603	8.46494	8.36514	8.25053	10.799	10.3195	9.6571
ENSNFUG00015005561	GULP1	-0.373636	1	1.2665	0.0606438	1.64014	0.0126952		4.90076	4.07137	4.05395	4.04561	3.9636	4.17348	5.49718	5.33723	5.50254
ENSNFUG00015020050	HADHAB	0.256521	1	-1.74309	0.0355767	-1.99961	0.0126952		4.08205	5.58882	5.64351	5.41226	5.62973	5.49815	3.35577	4.01277	4.06336
TAFAZZIN	NA	0.0212028	1	-2.49148	0.0114783	-2.51269	0.0126952		3.70658	4.78072	5.04124	4.63555	4.71755	4.62049	2.39162	2.87017	3.37284
ENSNFUG00015015120	XBP1	2.14585	0.0455621	-0.00559574	0.996914	-2.15144	0.0136826		5.23399	6.76324	7.10343	8.79465	8.58894	8.61333	5.23579	6.11117	7.46563
TMED6	NA	5.11677	0.0470748	-0.444633	0.943147	-5.5614	0.0136826		2	2.23626	2.24542	5.61004	2.73925	3.83786	2	2	2.3391
SLC27A2A	NA	1.1757	0.989795	-1.0363	0.419005	-2.21199	0.0144487		4.83689	6.80056	6.91233	7.45141	7.68429	7.61426	4.50538	4.87717	6.34642
ACOX1	NA	0.559689	1	-1.33891	0.130827	-1.8986	0.0148469		4.90076	5.8245	6.11423	6.14447	6.25333	6.30201	3.52165	4.28197	5.24472
PGLYRP6	NA	5.04818	0.0511482	-0.453835	0.942878	-5.50201	0.0149841		2	2	2.45509	5.48124	2.92022	3.92936	2.39162	2	2
RPL23A	NA	-1.45037	0.621946	0.697694	0.627576	2.14807	0.0149841		10.9058	8.34745	8.82022	8.36809	8.47777	8.25937	10.9987	10.4786	9.79601
MCM6	NA	-0.0272563	1	-3.70989	0.0114783	-3.68264	0.0149841		3.70658	4.34839	4.44638	3.62558	4.66777	4.0966	2	2	2.8439
RNASE_MRP	NA	-1.09467	1	1.50267	0.251601	2.59734	0.0150946		6.74807	3.72822	4.34471	4.7518	4.5072	4.44556	7.28716	7.0569	6.36509
ENSNFUG00015019590	RPL13	-1.60558	0.484274	0.581014	0.715639	2.1866	0.0160943		10.4403	7.89582	8.2286	7.72467	7.76345	7.72694	10.4626	9.8231	9.12218
ENSNFUG00015024799	LPL	1.42208	0.527925	-0.559355	0.697465	-1.98143	0.0160943		6.50261	6.13325	8.08229	8.51515	8.53789	8.65078	6.23085	5.86017	7.3579
ENSNFUG00015008033	OLA.26122	-2.30813	0.79494	1.32798	0.519185	3.63612	0.0160943		5.18352	3.04797	2.63813	2.60541	2.92022	2.55399	5.87991	5.17038	3.51337
ENSNFUG00015008090	KANK4	-1.8845	0.882622	1.20972	0.478704	3.09422	0.0160943		5.18352	2.91815	3.07903	2.83359	2.92022	2.9533	5.61202	5.07911	4.23558
ENSNFUG00015025167	SLC16A10	0.886518	0.942027	-0.776638	0.436311	-1.66316	0.0160943		4.46669	5.35794	5.36061	5.91439	6.01533	5.91115	4.04218	4.01277	5.07365
ENSNFUG00015001449	SUCLG1	0.549302	1	-0.707701	0.303091	-1.257	0.0160943		5.89788	6.67555	6.50436	6.86574	6.92835	7.00592	5.64836	5.33723	6.12332
ENSNFUG00015021675	SMPD1	0.948957	1	-1.31889	0.287055	-2.26785	0.0160943		2.97836	4.4922	5.19522	5.26353	5.46462	5.27213	3.67042	3.25084	3.64142
CLTCA	NA	0.604099	1	-1.15933	0.186798	-1.76343	0.0160943		4.18824	5.30697	5.57782	5.75637	5.70571	5.66717	4.04218	3.80059	4.5932
COPB1	NA	0.784563	1	-1.81887	0.146282	-2.60344	0.0160943		2.71968	5.43116	4.63045	5.37649	5.62973	4.96127	3.35577	3.40912	3.21712
ENSNFUG00015019055	ACO2	0.461991	1	-1.90952	0.0714733	-2.37151	0.0160943		3.19764	4.78072	4.83175	4.85937	4.76568	4.96127	2.69931	3.25084	3.37284
ENSNFUG00015017533	NFIL3-6	-0.00296586	1	1.33458	0.0140641	1.33755	0.0160943		5.66024	6.33751	5.62194	5.67036	5.62973	6.33585	6.93675	7.50556	7.08133
FOXA3	NA	0.114669	1	1.28702	0.00479857	1.17236	0.0160943		6.30435	5.73093	6.03485	6.03401	5.73017	6.53835	7.26393	7.36772	7.15828
ENSNFUG00015000267	RBP1A	0.560516	1	1.71287	2.59134e-05	1.15235	0.0160943		7.70317	7.32078	6.692	7.7598	7.96754	7.77707	9.23549	8.92265	8.72692
PGM1	NA	0.637257	1	-0.571452	0.42203	-1.20871	0.0162858		7.3267	8.2016	7.74088	8.2296	8.44489	8.59946	6.96583	7.00825	7.65202
NR1D2A	NA	0.0102786	1	2.06464	0.0131681	2.05436	0.0162858		3.84289	2.77547	4.34471	3.62558	3.47758	4.17348	5.64836	5.25622	5.53588
ENSNFUG00015017752	HSP90B1	-0.272138	1	-2.29034	0.0030331	-2.0182	0.0166246		7.10061	9.17765	8.67331	8.44781	8.53094	7.75222	5.32828	6.06434	7.04705
SLC22A6L	NA	1.50866	0.0051225	0.258838	0.807313	-1.24982	0.0169792		4.77006	5.58882	5.30756	6.68746	6.42797	6.9193	5.37239	5.74612	5.39763
ENSNFUG00015015122	CS	0.174887	1	-1.69662	0.0354554	-1.8715	0.0169952		4.18824	5.1993	5.28028	5.09769	5.2102	5.12505	3.1683	3.55175	4.06336
ENSNFUG00015014433	NACA	-1.03474	0.889201	0.680726	0.538973	1.71547	0.017062		8.66188	6.99019	7.03979	6.82651	6.79557	6.70298	8.83945	8.48959	7.87682
ENSNFUG00015023419	CDCA7A	0.340994	1	-4.92031	0.0282401	-5.26131	0.0173226		2	4.78072	4.05395	3.9515	4.94356	3.63536	2	2.35158	2
ENSNFUG00015009220	OLA.21581	0.0803591	1	1.11995	0.00689213	1.03959	0.0174001		6.76533	6.05818	6.39417	6.58148	6.2867	6.60924	7.63375	7.47007	7.40377
ENSNFUG00015015940	Nfu_g_1_003080	-0.754482	1	0.91351	0.299704	1.66799	0.0178111		5.62285	4.29708	4.67302	4.2172	4.44944	4.24646	5.78519	5.99112	5.46841
GSTM3	NA	-0.270121	1	1.04947	0.0792614	1.31959	0.0179515		6.79924	5.86029	6.48059	5.67036	6.48658	6.21377	7.69583	7.10396	7.44822
RPS4X	NA	-1.14458	0.823301	0.675008	0.575626	1.81959	0.017996		10.4537	8.43015	8.77696	8.4261	8.36514	8.32403	10.6613	10.1335	9.52428
ENSNFUG00015021595	RPL11	-1.49031	0.496362	0.509121	0.746161	1.99943	0.018676		11.3473	9.02636	9.2368	8.77761	8.90316	8.70357	11.2835	10.7044	10.1537
RIPK2	NA	0.761859	1	3.31298	0.00156292	2.55112	0.018676		2.71968	2.43922	3.07903	3.20385	2.53227	3.52235	5.45677	5.25622	3.86776
ENSNFUG00015001578	HMGCS1	-0.798058	1	-5.1998	0.0021466	-4.40174	0.018706		4.69999	9.49474	7.18659	8.07081	7.64624	5.64034	2.69931	3.07302	4.38941
ENSNFUG00015008333	RPL10	-0.823385	0.889201	0.535012	0.551759	1.3584	0.0193746		9.69357	8.43015	8.48006	8.11489	8.23016	8.18242	9.81527	9.49925	9.18657
TPT1	NA	-0.459909	1	0.915039	0.190092	1.37495	0.0193746		9.49837	8.17343	8.33185	8.38169	8.32956	8.3028	9.96323	9.7839	9.27561
ENSNFUG00015012252	Nfu_g_1_013648	-1.00435	0.665617	0.449072	0.661958	1.45342	0.0195181		6.92743	6.58219	5.62194	5.61004	5.43516	5.52773	7.25218	6.90572	6.4197
ENSNFUG00015008057	NDUFC2	0.60571	1	-0.630611	0.391383	-1.23632	0.0195181		7.00213	7.09154	6.83008	7.45141	7.67172	7.5723	6.23085	5.68552	6.92653
METAP2B	NA	-0.607497	1	0.705462	0.33022	1.31296	0.0195888		6.1552	5.1993	5.48529	5.14098	4.81224	5.30666	6.3679	6.34463	6.2085
ENSNFUG00015022530	FAM210B	0.0182164	1	1.1697	0.0154303	1.15148	0.0197528		5.54504	5.30697	5.30756	5.33981	5.1019	5.69351	6.23085	6.67584	6.47231
ENSNFUG00015015817	CCRN4L	-0.721649	1	2.52435	0.0650667	3.246	0.0198269		2.97836	3.27709	2.45509	2.60541	2.29055	2.9533	5.4152	4.64229	3.04255
ENSNFUG00015009576	MCM3	-0.153048	1	-3.34906	0.0115591	-3.19601	0.0198269		3.84289	4.29708	4.54135	3.74259	4.71755	3.74016	2.39162	2	2.8439
RPL36A	NA	-1.85425	0.370459	0.446558	0.819289	2.30081	0.0198393		11.0154	7.97141	8.62804	7.97838	8.16437	7.78321	10.8613	10.149	9.4497
ENSNFUG00015023240	CNP	0.469229	1	-1.0609	0.172468	-1.53013	0.0198393		4.96192	6.47083	6.24696	6.36128	6.77221	6.28479	5.03085	4.98167	5.20382
TM9SF3	NA	0.526153	1	-2.74007	0.068852	-3.26623	0.0198393		2.40426	5.25414	4.71437	5.05307	5.27813	4.62049	2	2.63405	3.37284
PMT	NA	-0.118207	1	0.60848	0.0662968	0.726687	0.0198393		8.57645	8.33478	8.44671	8.31239	8.35338	8.34495	9.06788	9.17767	8.91288
DPYDB	NA	0.180357	1	-1.08845	0.0600358	-1.2688	0.0198393		5.98885	5.52335	5.70634	6.07922	5.99529	5.613	4.50538	4.87717	4.87954
NFIX	NA	0.306404	1	1.32448	0.000743439	1.01807	0.0198393		5.80078	5.67173	5.5323	5.88923	5.84661	6.10022	7.14181	6.93204	6.6503
LIPCA	NA	0.823376	0.498809	-0.268799	0.762426	-1.09218	0.0204333		8.09998	7.55722	8.55879	8.97887	8.84835	8.9985	7.71309	7.72466	8.11605
ENSNFUG00015018125	GRID2IPA	-1.23154	0.742423	0.617183	0.638955	1.84872	0.0204333		11.7509	9.57232	9.92477	9.564	9.54052	9.4716	11.8323	11.3566	10.7021
TBXAS1	NA	1.31647	0.742423	-0.800722	0.593517	-2.1172	0.0204333		3.38794	4.18864	4.63045	5.22383	5.06391	5.55672	2.95278	3.07302	4.31455
ENSNFUG00015001374	RPSA	-0.619894	1	0.756364	0.337137	1.37626	0.0204333		10.3301	9.0498	9.19542	9.07685	8.92717	9.07563	10.7929	10.3612	9.90369
ENSNFUG00015015200	CABZ01076275.1	0.919014	1	-1.37246	0.287055	-2.29147	0.0204333		3.38794	5.11292	5.50899	5.78394	5.97497	5.49815	2.95278	3.55175	4.52842
UGP2	NA	0.812943	1	-2.17525	0.146814	-2.98819	0.0204333		2.40426	4.78072	4.17737	4.7518	4.9011	4.67439	2	3.07302	3.04255
RPN2	NA	0.271634	1	-1.46695	0.0679443	-1.73858	0.0204333		5.4628	6.54967	6.52775	6.56569	6.61033	6.40124	3.92858	4.64229	5.66203
ENSNFUG00015004769	EIF4A1 ENSNFUG00015004769	-0.736892	1	0.705894	0.421392	1.44279	0.0207885		9.01201	7.6316	7.67957	7.54299	7.48311	7.56518	9.22951	9.05728	8.47092
ENSNFUG00015023812	RPL10A	-0.49052	1	0.772724	0.264795	1.26324	0.0207885		10.6799	9.33856	9.78136	9.59546	9.51611	9.55118	11.0648	10.8261	10.493
ENSNFUG00015010795	TXNRD1	0.621286	1	-1.75002	0.142274	-2.37131	0.0207885		3.19764	4.85356	4.83175	4.80658	5.31094	4.91725	2.39162	3.25084	3.75902
ENSNFUG00015010404	TRAM1	0.31709	1	-1.44611	0.0813588	-1.76319	0.0207885		5.37558	7.16493	6.88543	7.08104	7.16205	6.62301	4.58252	5.25622	5.83272
RPS25	NA	-1.36005	0.738022	0.649619	0.661697	2.00967	0.021286		11.7454	9.15801	9.79828	9.3175	9.40844	9.21853	11.8718	11.2304	10.5685
RPL8	NA	-0.979715	0.889201	0.592988	0.582668	1.5727	0.021286		10.74	9.03422	9.24034	8.98185	8.84835	8.90015	10.8738	10.4205	10.0024
RPS8A	NA	-0.982748	0.942027	0.667473	0.550643	1.65022	0.021286		11.1675	9.3559	9.56107	9.28169	9.38937	9.20257	11.3642	10.8988	10.3851
PPP6C	NA	-1.22342	1	0.899958	0.485663	2.12338	0.021286		5.58447	4.00896	3.84643	3.62558	3.78832	3.74016	5.9688	5.25622	4.97986
ENSNFUG00015007690	EIF3M	-0.504571	1	0.781368	0.266953	1.28594	0.021286		7.39482	6.31189	6.44419	6.39742	6.25333	6.26736	7.78829	7.65526	7.1258
ENSNFUG00015010958	CR382327.1	-0.653403	1	1.16161	0.207187	1.81501	0.021286		4.28715	4.704	4.23533	4.2172	4.04385	3.39972	5.9688	5.45082	4.5932
MCM5	NA	-0.0728866	1	-2.55077	0.0164204	-2.47789	0.021286		4.18824	4.53712	4.49464	3.9515	4.81224	4.17348	2.39162	2.35158	3.37284
PAM	NA	1.46753	0.781208	-1.39807	0.46402	-2.86561	0.0213268		2.71968	3.16708	3.41626	4.13395	4.04385	4.24646	2.39162	2.35158	2.8439
UBA1	NA	1.08509	0.882622	-0.71232	0.575626	-1.79741	0.0232308		3.38794	4.9229	5.07338	5.69961	5.70571	5.46795	3.80526	3.91058	4.46059
ENSNFUG00015011984	ACADVL	0.0902879	1	-1.93942	0.0339965	-2.0297	0.0232308		3.84289	5.05232	5.33433	4.80658	5.175	4.91725	3.1683	3.07302	3.86776
ACLY	NA	0.113539	1	-3.32994	0.0310585	-3.44348	0.0232726		2.40426	5.75014	4.34471	5.48124	4.76568	3.83786	2.69931	2.63405	2.61347
MSMO1	NA	-0.80407	1	-3.04506	0.000511286	-2.24099	0.0237184		8.55676	10.2748	10.9393	9.91199	9.53705	8.44911	7.03608	5.62227	8.04257
ENSNFUG00015014165	CRY2A	1.44047	0.902451	-1.14705	0.52393	-2.58752	0.0238662		2	3.94373	4.39644	4.91029	5.1019	4.82495	2.69931	3.25084	3.21712
GNG5	NA	-1.46602	0.332462	0.260643	0.85707	1.72666	0.0242305		6.30435	4.95636	5.04124	4.2172	4.38928	4.24646	6.20668	5.77549	5.24472
ENPP6	NA	0.743973	1	-1.51754	0.224074	-2.26151	0.0242305		2.97836	4.9229	5.30756	5.44716	5.31094	5.37336	3.35577	3.07302	4.06336
EEF1G	NA	-1.55864	0.315837	0.249239	0.882083	1.80787	0.0244344		9.78948	7.70725	7.83293	7.1568	7.32348	7.25616	9.40436	9.11586	8.38205
RPS11	NA	-1.26447	0.665617	0.49448	0.724251	1.75895	0.0244344		10.4241	8.30587	8.72733	8.23959	8.28072	8.09125	10.4639	9.80007	9.38027
ENSNFUG00015003324	FAM134C	1.41816	0.704447	-0.843961	0.621893	-2.26212	0.0244344		2.97836	3.47476	4.17737	4.57372	4.71755	4.96127	2.39162	3.07302	3.64142
ENSNFUG00015015777	COX7A3	-0.748915	1	0.539918	0.538973	1.28883	0.0244344		8.43802	7.32719	7.18659	7.08104	7.07878	6.9193	8.51968	8.32056	7.98338
ENSNFUG00015025385	ANGPTL3	1.17826	1	-1.33431	0.390965	-2.51257	0.0244344		4.28715	7.29486	6.01843	7.73176	7.00051	7.59343	3.35577	4.98167	5.93623
ENSNFUG00015009980	EIF3C	-0.45406	1	0.775625	0.248824	1.22968	0.0244344		6.56308	5.71147	5.84312	5.72827	5.43516	5.76976	7.00839	6.97065	6.38353
ENSNFUG00015016643	Nfu_g_1_007336	0.821308	1	-1.53129	0.242987	-2.3526	0.0244344		3.70658	7.12135	5.19522	6.79975	6.91774	6.56712	4.3375	4.70469	4.77173
ENSNFUG00015001705	RPS6	-0.378458	1	0.824001	0.20311	1.20246	0.0244344		10.3602	9.14356	9.3818	9.41989	9.3064	9.32556	10.8081	10.5334	10.2523
ENSNFUG00015013978	HSPA9	0.0403769	1	-1.68816	0.0310585	-1.72853	0.0244344		4.54872	6.21845	6.55076	6.05679	6.0351	6.06029	4.3375	4.70469	4.46059
CTH1	NA	0.892669	1	2.72278	0.000405316	1.83011	0.0244344		3.55604	3.56429	2.63813	3.49822	3.69199	4.31592	5.37239	5.77549	4.93057
PNN	NA	-1.35791	0.90193	0.793161	0.589342	2.15107	0.024567		6.35082	4.53712	4.44638	4.2959	4.19208	4.17348	6.66252	6.22199	4.97986
HSPA8	NA	-0.424455	1	0.748786	0.251761	1.17324	0.024567		9.77037	8.67841	8.78911	8.78445	8.70146	8.74509	10.1331	9.98586	9.54898
PTPA	NA	-1.31641	0.855054	0.672859	0.614936	1.98927	0.0248484		5.4628	3.94373	4.05395	3.74259	3.47758	3.63536	5.61202	5.07911	4.82664
ENSNFUG00015012229	BTF3	-0.85013	1	0.700266	0.49246	1.5504	0.0248484		8.83533	7.33357	7.20846	7.2487	7.11638	7.10737	9.06453	8.69567	8.14335
ENSNFUG00015020939	PARK7	-0.175049	1	0.813012	0.090933	0.988061	0.0255272		7.21808	6.43568	6.65	6.67279	6.63645	6.56712	7.71309	7.59063	7.43944
ENSNFUG00015020423	MEAF6	-0.662819	1	0.853444	0.337046	1.51626	0.0257171		6.91202	5.35794	5.55523	5.51454	5.34301	5.58513	7.06325	7.02056	6.61953
ENSNFUG00015014255	NAA20	-0.958876	1	0.699319	0.543507	1.6582	0.0261232		8.39431	6.77266	6.66061	6.70198	6.44285	6.56712	8.60073	8.25431	7.51662
A1CF	NA	0.767931	0.711347	-0.340486	0.699178	-1.10842	0.0266921		6.62111	6.16221	6.40684	7.06989	7.01053	7.32517	5.61202	5.94016	6.52307
ENSNFUG00015012843	CDO1	0.956041	0.987955	-0.645266	0.569786	-1.60131	0.0266921		7.11414	8.87493	8.26036	9.15546	9.15428	9.29148	6.92198	7.24711	8.30679
ENSNFUG00015002816	EIF3K	-0.684561	1	0.627795	0.45929	1.31236	0.0266921		7.58178	6.41175	6.59571	6.4671	6.21918	6.1769	7.90551	7.5572	7.11481
ENSNFUG00015021475	AK2	-0.700239	1	0.787055	0.391383	1.48729	0.0266921		7.26737	5.91237	5.84312	5.98735	5.68082	5.79431	7.53046	7.32863	6.78118
OGDH	NA	0.539998	1	-1.99281	0.126743	-2.53281	0.0266921		2.71968	4.39794	4.23533	4.2959	4.61621	4.31592	2.69931	2.63405	3.04255
SCAMP4	NA	0.364361	1	-1.56372	0.105891	-1.92808	0.0266921		3.70658	4.78072	4.71437	4.80658	4.94356	4.67439	2.69931	3.55175	3.64142
ASMTL	NA	0.319351	1	-1.59946	0.0914284	-1.91881	0.0266921		4.83689	6.87244	6.5846	6.51724	6.71208	6.70298	4.24562	4.28197	5.63151
ENSNFUG00015008429	Nfu_g_1_006955	-0.0736566	1	0.851715	0.0530829	0.925372	0.0266921		9.60527	8.71063	9.12049	9.17381	9.03908	9.1321	10.0742	9.94605	10.085
ENSNFUG00015010335	PDIA4	0.0796053	1	-1.93825	0.0395056	-2.01786	0.0266921		6.18116	8.32521	8.098	8.00791	8.12341	7.40704	5.03085	5.21394	6.82229
-	NA	-2.29918	0.160931	0.0808805	0.977329	2.38006	0.0269479		17.7959	14.497	14.7655	14.1588	14.2213	14.2296	17.2018	16.5372	15.5729
PTH3R	NA	0.673396	1	-0.848805	0.374193	-1.5222	0.0269479		4.77006	4.62297	5.4612	5.75637	5.62973	5.4371	3.80526	4.10819	4.77173
ZBTB20	NA	-0.0609928	1	1.52432	0.0385093	1.58532	0.0269479		5.58447	4.4922	4.34471	4.85937	4.66777	4.96127	6.62655	6.45765	5.53588
ENSNFUG00015014886	RNF2	0.278823	1	1.71154	0.00509637	1.43272	0.0269479		6.35082	5.14229	4.94029	5.54708	5.70571	6.21377	7.4192	7.1718	7.04705
COPS8	NA	-1.16818	0.501574	0.302399	0.805006	1.47058	0.0271441		5.98885	4.8176	5.10482	4.44149	4.19208	4.44556	5.84902	5.52186	5.53588
RPS27A	NA	-1.2742	0.773599	0.564274	0.697465	1.83847	0.0271441		11.3015	8.99853	9.48993	9.05156	9.11535	8.88594	11.4099	10.7734	10.0651
ENSNFUG00015006565	RPS14	-1.11775	0.90193	0.631141	0.626203	1.74889	0.0271441		10.8093	8.61435	9.16031	8.81818	8.80871	8.55706	10.9925	10.3673	9.8199
ENSNFUG00015010652	SRP68	0.909653	1	-1.75259	0.248824	-2.66224	0.0271441		2.40426	5.75014	5.07338	5.81099	6.01533	5.49815	2.69931	3.91058	3.86776
MVDA	NA	-1.31069	1	-4.42897	0.000377719	-3.11828	0.0273576		3.38794	7.8915	6.38139	6.05679	5.86881	4.01541	3.35577	3.25084	2.8439
LHPP	NA	1.96402	0.0814804	0.0352085	0.987908	-1.92881	0.0274175		2.97836	4.1312	2.94649	5.00703	5.06391	5.00399	3.35577	3.40912	3.75902
ENSNFUG00015016271	RPS24	-1.05017	0.889201	0.553926	0.650939	1.6041	0.0287644		10.5527	8.68092	8.88503	8.56367	8.74412	8.44911	10.6093	10.1178	9.67778
RPL13A	NA	-0.886055	1	0.623648	0.560046	1.5097	0.0287644		10.7455	8.92649	9.27357	8.97887	9.03172	8.97454	10.8535	10.4764	10.0537
ENSNFUG00015017515	CABZ01072585.1	-0.566745	1	0.826865	0.317285	1.39361	0.0287644		6.78238	5.40716	5.57782	5.30218	5.60349	5.613	6.95136	6.91894	6.58808
ENSNFUG00015004825	SAR1B	0.417311	1	-2.28762	0.0909974	-2.70493	0.0287644		3.38794	7.17207	6.80158	6.87858	7.15303	6.53835	2.95278	4.1977	5.24472
ITIH2	NA	1.52347	0.344118	-0.224428	0.898448	-1.7479	0.0289622		7.52211	8.97627	9.35099	10.2277	10.2926	10.4328	7.58772	8.0651	9.42989
ENSNFUG00015015712	RPL27A	-1.29002	0.804544	0.588002	0.69378	1.87802	0.0289622		11.8134	9.38076	9.79467	9.49895	9.53705	9.33814	11.877	11.2284	10.6228
THAP4	NA	-2.23236	1	1.73272	0.390965	3.96508	0.0289622		3.70658	2.23626	3.07903	2.33423	2	2.55399	5.08488	4.01277	2.8439
ENSNFUG00015008279	DGAT2	0.594359	1	-1.82764	0.155805	-2.422	0.0289622		3.84289	5.979	5.84312	5.75637	6.55663	5.66717	2.69931	3.40912	4.87954
ENSNFUG00015024069	ACACA	0.0873359	1	-1.9462	0.044372	-2.03353	0.0289622		3.70658	4.74287	5.19522	5.05307	4.85736	4.31592	3.52165	3.25084	3.04255
PLG	NA	1.17697	0.0813869	0.0665596	0.958292	-1.11041	0.028979		9.54659	10.1375	10.3523	11.1787	11.1726	11.3199	9.72883	9.79111	10.6421
ENSNFUG00015010614	EIF4A2	-0.884113	1	0.581509	0.55958	1.46562	0.0290224		5.76691	4.704	4.75457	4.2959	4.26085	4.56451	5.64836	5.88733	5.39763
AP1B1	NA	0.472467	1	-2.62273	0.0951878	-3.0952	0.0290224		2.71968	4.18864	3.77005	4.13395	4.11987	3.92936	2	2.35158	2.8439
ENSNFUG00015003365	ATP13A	0.37262	1	-4.26277	0.0602317	-4.63539	0.0290857		2	3.94373	3.91897	3.74259	4.11987	3.52235	2	2.35158	2
ENSNFUG00015014754	PXDC1B	1.03095	1	-1.11855	0.425945	-2.1495	0.029151		3.70658	6.02703	6.0987	6.65797	6.42797	6.68995	3.80526	4.01277	5.46841
GNB3B	NA	-1.42592	1	1.68911	0.301998	3.11502	0.029151		3.84289	3.04797	2.45509	2.33423	2.73925	2.55399	4.97472	4.43705	3.04255
ENSNFUG00015017175	CWC25	-1.06961	1	1.00945	0.41666	2.07906	0.0293282		4.37971	3.87541	3.51316	3.20385	3.08101	3.39972	5.37239	4.64229	3.86776
ENSNFUG00015022192	DEC1B	0.568877	1	-2.31748	0.128298	-2.88636	0.0293282		3.70658	3.27709	3.60397	3.9515	3.69199	4.0966	2.39162	2.63405	2.3391
ENSNFUG00015010810	SLC1A5	0.41547	1	-3.25361	0.0745041	-3.66908	0.0293282		2.40426	5.2808	3.20041	4.63555	4.66777	4.17348	2	2.35158	2.8439
MAN1A2	NA	1.32717	1	3.53072	0.000459559	2.20355	0.0297698		2.71968	2.77547	2.80053	3.74259	2.92022	3.63536	5.78519	5.3761	3.75902
ENSNFUG00015018049	H6PD	0.715866	1	-1.39985	0.266953	-2.11572	0.0300008		2.97836	4.62297	4.49464	4.80658	5.06391	4.56451	3.1683	2.87017	3.64142
ENSNFUG00015019863	STBD1	0.447159	1	-2.31283	0.102849	-2.75999	0.0300008		2.40426	4.44584	4.49464	4.2959	4.66777	4.31592	2.39162	2.63405	3.04255
ENSNFUG00015012879	RPLP2	-1.11905	1	0.806654	0.560046	1.92571	0.0304844		11.4213	8.96193	9.29076	9.24497	9.26305	9.14169	11.7401	11.034	10.2697
ENSNFUG00015001800	M6PR	0.580661	1	-2.1181	0.145939	-2.69876	0.0305425		2.71968	3.87541	4.23533	4.13395	4.38928	4.0966	2.39162	2.35158	3.04255
ENSNFUG00015011629	LSM8	-1.1808	0.452604	0.233797	0.852168	1.4146	0.0310135		6.28053	5.08293	5.30756	4.7518	4.5072	4.50626	6.05253	5.86017	5.60034
ENSNFUG00015017164	PSMB3	-0.67959	0.667932	0.232504	0.763058	0.912094	0.0310135		7.12755	6.59287	6.59571	6.07922	6.21918	6.10022	6.96583	7.03278	7.02374
ENSNFUG00015022121	ENTPD1	0.645246	1	-1.02718	0.328299	-1.67243	0.0310135		3.96742	4.8176	4.71437	5.33981	5.27813	4.67439	3.1683	4.01277	3.96887
IFRD2	NA	-0.368132	1	-3.71515	0.0147662	-3.34702	0.0310135		2.71968	5.8245	4.39644	4.44149	4.85736	4.17348	2	3.07302	2.3391
NNT	NA	0.781108	1	-2.52844	0.167489	-3.30955	0.0312238		2.71968	3.27709	3.84643	3.9515	4.04385	3.74016	2	2.35158	2.61347
RPS7	NA	-0.990788	1	0.683926	0.576455	1.67471	0.0315217		10.5798	8.43905	8.88276	8.65608	8.70455	8.51706	10.7371	10.2893	9.6533
RPL18	NA	-0.323231	1	0.758683	0.221402	1.08191	0.0315217		11.3213	10.1709	10.5008	10.5105	10.4306	10.3284	11.7459	11.4704	11.2562
ENSNFUG00015015428	RPL6	-1.30368	0.726307	0.485104	0.755069	1.78878	0.0318874		11.0789	8.71553	9.0736	8.79126	8.74712	8.63727	10.921	10.5377	9.87141
RPL7A	NA	-0.849144	1	0.575045	0.583362	1.42419	0.0318874		10.6076	8.89016	9.23147	8.99371	8.92452	8.88022	10.7083	10.3007	9.93995
ENSNFUG00015014597	BX572630.2	1.74782	0.0388456	0.249756	0.863477	-1.49806	0.0319336		4.46669	5.52335	5.6857	7.04732	7.215	6.60924	4.58252	5.91398	5.83272
ENSNFUG00015000447	ADKA	1.62777	0.321919	-0.192858	0.920398	-1.82063	0.0322262		3.96742	6.05818	5.04124	6.75866	6.81857	6.83898	4.24562	4.87717	5.77803
ENSNFUG00015001793	ATG16L2	-0.963174	0.371204	0.140224	0.895685	1.1034	0.0322262		6.18116	5.76909	5.78608	5.00703	5.13891	4.96127	6.301	6.08794	5.69192
LAMTOR5	NA	-1.02544	0.514439	0.230939	0.842802	1.25638	0.0322262		7.88786	6.51641	6.94744	6.12305	6.3512	6.23186	7.69583	7.38688	7.23133
ENSNFUG00015000906	MOCS2	-0.786668	0.599932	0.226486	0.798953	1.01315	0.0322262		6.89644	6.24577	6.31574	5.75637	5.57677	5.93342	6.83006	6.73683	6.58808
ENSNFUG00015006067	MANF	-0.169827	1	-2.21477	0.0203382	-2.04494	0.0322262		5.66024	8.69833	7.65323	7.80086	7.89367	7.07768	4.79191	5.74612	6.16654
ENSNFUG00015012644	Nfu_g_1_012109	3.54031	2.42401e-06	5.04578	4.4613e-14	1.50547	0.0322922		2.71968	3.04797	3.31237	4.95947	5.31094	6.5813	7.20416	7.16071	7.32966
ACTA2	NA	3.18485	0.178944	-0.263231	0.950187	-3.44808	0.0322922		2.40426	2.43922	2.94649	5.64052	3.69199	3.2657	2	2.35158	3.04255
RPS13	NA	-1.55196	0.553335	0.373824	0.839158	1.92579	0.0322922		10.8412	8.36	8.69671	8.20432	8.35338	8.04597	10.7339	10.0061	9.23559
RPL17	NA	-1.01717	0.972659	0.598911	0.630153	1.61609	0.0322922		10.9136	8.91164	9.17889	8.9729	8.97912	8.89164	11.0031	10.5063	9.98289
ENSNFUG00015009115	TRAPPC1	-0.97348	1	0.689958	0.555763	1.66344	0.0322922		6.04646	4.29708	4.71437	4.44149	4.38928	4.24646	5.99725	5.83249	5.60034
COA5	NA	-0.353884	1	0.78208	0.22617	1.13596	0.0322922		6.07442	5.30697	5.48529	5.30218	5.27813	5.37336	6.68018	6.30489	6.07877
ENSNFUG00015024340	CECR5	-0.156632	1	-1.67461	0.0165788	-1.51798	0.0322922		4.77006	5.2808	5.38643	4.91029	5.37439	4.77649	3.52165	4.10819	3.75902
QSOX1	NA	1.09958	0.486632	-0.235203	0.853854	-1.33478	0.0324954		5.5045	6.31189	6.49253	7.1031	7.22364	7.35023	5.53648	5.41394	6.58808
ENSNFUG00015017942	SLC25A1B	0.639683	1	-0.862297	0.371377	-1.50198	0.0325811		6.32777	7.95081	7.84694	8.18894	8.23445	8.09125	6.05253	6.43942	7.32012
ENSNFUG00015019408	BLOC1S5	-0.750796	0.926598	0.401193	0.635107	1.15199	0.0327313		5.28274	4.98906	5.41179	4.50912	4.5072	4.72634	5.53648	5.65424	5.60034
SNORD15	NA	-7.40468	0.120589	-0.308681	0.966891	7.096	0.0328806		6.04646	2	4.97473	2	2	2	5.64836	4.1977	3.96887
ILF3B	NA	-1.56891	0.595171	0.419159	0.805308	1.98807	0.0328806		5.80078	3.94373	4.29106	3.74259	3.58877	3.63536	5.64836	5.25622	4.71464
ENSNFUG00015024525	RPS12	-0.941103	1	0.622835	0.596704	1.56394	0.0328806		11.6027	9.66504	10.1822	9.8251	9.95015	9.56194	11.8373	11.3022	10.6743
TKTB	NA	0.442709	1	-0.7498	0.311644	-1.19251	0.0328806		6.91202	7.86091	7.79488	7.89867	8.13261	8.02538	6.5129	6.47566	7.38559
ENSNFUG00015018442	PPDPFB	-0.215618	1	0.780017	0.146454	0.995634	0.0328806		7.74727	6.96575	6.83945	7.1031	7.01053	6.95239	8.1405	7.96668	7.8703
ENSNFUG00015013741	CCZ1	0.485818	1	-1.97841	0.142481	-2.46423	0.0328806		2.97836	4.24388	3.91897	3.9515	4.44944	4.17348	2.39162	3.07302	2.61347
ENSNFUG00015017609	TMED7	-0.269734	1	-1.99294	0.0114783	-1.72321	0.0328806		4.69999	6.41175	5.98503	5.69961	5.80115	5.3404	3.67042	3.91058	4.65519
ENSNFUG00015005855	TRAPPC2L	-0.756186	0.889201	0.35598	0.682885	1.11217	0.0329387		6.2317	5.5455	5.84312	5.14098	5.31094	5.12505	6.47294	5.88733	6.24927
ENSNFUG00015007598	Nfu_g_1_007730	-0.49036	1	-1.52182	0.00040822	-1.03146	0.0329387		12.5152	11.5472	12.5083	11.5457	11.6959	12.0153	10.8593	10.4831	10.8361
MEIS1B	NA	-0.99001	1	1.17289	0.376797	2.1629	0.0332459		4.90076	3.56429	3.77005	3.62558	3.08101	3.63536	5.84902	5.07911	3.96887
GYS1	NA	0.857393	1	-1.1568	0.391886	-2.01419	0.0336395		3.19764	4.88864	3.84643	4.85937	5.06391	4.72634	2.95278	3.55175	3.51337
SELENOW2B	NA	0.715951	1	-1.02335	0.362826	-1.7393	0.0337357		5.69668	6.96575	7.29277	7.64423	7.215	7.60041	4.58252	5.55611	6.63499
MOGAT3B	NA	0.136149	1	-1.8644	0.0659963	-2.00055	0.0340333		3.55604	4.74287	4.67302	4.44149	4.9011	4.24646	2.95278	3.40912	3.04255
ENSNFUG00015007288	Nfu_g_1_016545	1.22078	0.120614	0.0493391	0.973164	-1.17144	0.0342643		5.41985	5.58882	5.86164	6.77249	6.74845	6.86239	5.18722	5.33723	6.26923
ENSNFUG00015024091	RPL21	-1.02251	0.90193	0.510303	0.684006	1.53281	0.0342643		10.2634	8.43609	8.63344	8.36353	8.37293	8.29851	10.3207	9.80542	9.29278
ENSNFUG00015023247	RSL24D1	-0.455589	1	0.697657	0.333573	1.15325	0.0342643		7.69419	6.50515	6.72272	6.71636	6.45757	6.67681	7.913	7.75447	7.53322
EIF4G2B	NA	0.614291	1	-1.4352	0.245212	-2.04949	0.0342643		2.97836	4.58069	4.58659	4.69484	4.85736	4.72634	2.69931	3.40912	3.51337
ZMYND8	NA	-0.807953	1	1.70359	0.207511	2.51154	0.0342643		4.08205	2.77547	2.94649	2.83359	3.08101	2.76742	5.23579	4.50876	3.51337
ALDH1L1	NA	0.229519	1	0.988961	0.00291373	0.759442	0.0342643		8.24236	7.76031	8.15543	8.34051	8.09544	8.41786	8.97079	9.03013	9.12218
SLC51A	NA	0.172619	1	-1.6008	0.0804833	-1.77342	0.0346836		7.3267	9.47323	9.65962	9.41108	9.53532	8.88022	6.99434	6.98329	8.26763
TENT4B	NA	-1.2007	1	1.16444	0.383595	2.36514	0.0355173		3.55604	3.16708	3.20041	2.60541	2.73925	2.76742	4.58252	4.01277	3.51337
ENSNFUG00015015237	INSIG1	2.74207	9.93603e-05	1.13466	0.249855	-1.60742	0.0356448		5.23399	5.7878	4.94029	8.17339	6.98026	8.43357	5.37239	6.38329	7.04705
ENSNFUG00015013418	C8ORF4	-0.752528	1	2.23096	0.142481	2.98349	0.0358514		3.55604	2.77547	2.45509	2.83359	2.53227	2.55399	5.28277	4.28197	2.8439
ANKRD11	NA	-1.87848	0.889201	0.815621	0.665968	2.6941	0.0362472		4.46669	2.43922	3.77005	2.60541	2.53227	2.9533	4.65575	4.43705	3.86776
RPL35A	NA	-1.14808	0.990381	0.657424	0.64689	1.8055	0.0362472		9.32299	6.94923	7.42319	7.23877	7.29916	6.8968	9.50933	8.78863	8.20164
TSC1B	NA	-1.96102	0.942027	0.979185	0.591644	2.9402	0.0365388		4.18824	2.77547	2.80053	2.60541	2.29055	2.55399	4.42388	3.91058	3.64142
ATP1B3A	NA	-1.58978	0.982423	0.852842	0.621482	2.44263	0.0369225		4.90076	2.91815	3.41626	2.83359	2.73925	3.2657	5.03085	4.57707	4.15204
ENSNFUG00015010131	RPL23	-1.32249	0.822674	0.516757	0.755069	1.83925	0.0374152		12.3011	9.76166	10.1932	9.94442	9.96826	9.73518	12.3134	11.5421	11.0063
ENSNFUG00015022164	FNDC3BA	-0.875989	1	0.876722	0.421583	1.75271	0.0374152		4.46669	3.56429	3.6894	3.49822	3.08101	3.39972	4.72543	4.64229	4.46059
ENSNFUG00015012915	RPL7	-0.498259	1	0.686354	0.381448	1.18461	0.0374152		11.1756	9.75216	10.0682	10.0532	9.90386	9.94979	11.3926	11.087	10.9378
PPIFA	NA	-0.488474	1	0.923781	0.272274	1.41226	0.0374152		5.4628	4.34839	4.44638	4.2172	4.32649	4.62049	5.78519	5.71614	5.3609
ENSNFUG00015023045	TEX261	0.665153	1	-1.7069	0.234195	-2.37205	0.0374152		2.97836	4.704	4.05395	4.69484	4.76568	4.44556	2	3.07302	3.51337
ENSNFUG00015006410	CHCHD1	-0.758982	1	0.489421	0.611684	1.2484	0.0375348		7.76454	6.81887	6.80158	6.37946	6.59709	6.40124	8.21507	7.45199	7.13671
UFC1	NA	-0.605157	1	0.635693	0.459101	1.24085	0.0375348		7.19279	6.05818	5.95084	5.96344	5.89068	5.93342	7.19191	7.31869	6.78118
ENSNFUG00015020131	MYCBP	-0.895432	1	1.71585	0.231216	2.61128	0.0375348		3.55604	3.27709	2.80053	2.83359	2.73925	2.76742	5.03085	4.64229	2.8439
ENSNFUG00015009278	MCM2	0.503279	1	-2.80186	0.12232	-3.30514	0.0375348		2.40426	4.07137	3.6894	3.74259	4.19208	3.83786	2.69931	2.35158	2
MRS2	NA	0.134295	1	-0.959881	0.100361	-1.09418	0.0377885		5.66024	5.30697	5.64351	5.61004	5.70571	5.66717	4.65575	4.57707	4.82664
TM4SF5	NA	-0.0821895	1	0.86965	0.0804833	0.951839	0.0377885		7.76454	7.15776	6.99854	7.32575	7.35527	7.07768	8.39692	8.25951	7.8703
ALG2	NA	0.425845	1	-2.6233	0.112198	-3.04915	0.0379571		2.40426	5.30697	3.77005	4.69484	4.81224	4.44556	2	2.63405	3.21712
ENSNFUG00015019428	MCL1B	-0.0287519	1	1.16699	0.0568808	1.19575	0.0379571		6.76533	5.61	5.82435	6.12305	6.01533	6.19546	7.49099	7.39636	6.80872
ENSNFUG00015011780	PPT2	-0.794432	1	0.531143	0.606338	1.32558	0.0380801		10.4255	8.84621	9.16777	8.87375	8.93508	8.76385	10.5719	10.1092	9.72733
ENSNFUG00015021189	MRTO4	-0.758377	1	0.470228	0.604166	1.22861	0.038138		5.54504	4.9229	4.86885	4.7518	4.38928	4.24646	5.61202	5.48678	5.53588
ENSNFUG00015011306	EEF1B2	-1.34816	0.708716	0.421664	0.798953	1.76983	0.0383482		10.0511	7.60547	8.03819	7.69593	7.76936	7.46935	9.83904	9.4201	8.73412
ENSNFUG00015006510	SLC1A4	1.09268	0.942027	-0.577856	0.680966	-1.67054	0.0384173		5.18352	6.6348	6.77251	7.40777	7.26608	7.55803	4.79191	5.3761	6.63499
ENSNFUG00015009898	GNE	0.195663	1	-2.88469	0.0734829	-3.08035	0.0384173		3.70658	3.64858	3.51316	3.74259	4.04385	3.39972	2	2.35158	2.61347
ENSNFUG00015014017	STT3B	0.760358	1	-0.896588	0.442097	-1.65695	0.0386236		4.08205	5.2808	5.50899	5.86362	5.70571	5.79431	3.67042	3.91058	5.02752
ENSNFUG00015021074	DHCR24	-0.20204	1	-2.93292	0.0297826	-2.73088	0.0386236		4.37971	6.47083	7.69514	6.91644	6.62345	5.86554	2.69931	2.87017	5.24472
BHMT	NA	1.71696	8.21173e-06	2.6301	1.17222e-14	0.913144	0.0390435		10.4268	10.2052	9.46894	11.7751	11.6473	11.9618	12.7777	12.8109	12.5348
TMEM214	NA	0.254983	1	-1.59519	0.114168	-1.85017	0.0390435		3.38794	5.25414	5.30756	5.05307	5.27813	5.04549	3.35577	3.68153	3.86776
ACO1	NA	0.613333	1	-0.791657	0.42036	-1.40499	0.0395287		4.37971	5.2808	5.41179	5.5789	5.82406	5.58513	4.50538	3.80059	4.82664
SLC4A1A	NA	0.198015	1	-2.09322	0.087978	-2.29124	0.040235		3.96742	3.64858	4.49464	3.9515	4.11987	4.56451	3.1683	2	3.04255
ENSNFUG00015022783	LRRC8E	-0.81457	1	0.807787	0.455479	1.62236	0.0403773		4.77006	4.29708	4.05395	4.04561	3.78832	3.39972	5.45677	5.21394	4.31455
ENSNFUG00015021969	EIF1B	-0.117272	1	0.632516	0.126743	0.749787	0.0407085		7.9113	7.92146	7.51965	7.69593	7.66539	7.67501	8.53432	8.51157	8.18072
ENSNFUG00015021917	FABP3	-0.646612	1	0.455129	0.596945	1.10174	0.0409313		10.8041	9.79325	9.61255	9.45675	9.52312	9.59375	10.906	10.6179	10.2784
THOP1	NA	1.10634	1	-1.185	0.477502	-2.29134	0.0409313		3.19764	5.2808	5.64351	6.14447	5.86881	6.13907	3.1683	3.07302	5.02752
RPN1	NA	0.582637	1	-1.10221	0.311758	-1.68485	0.0409313		5.07697	6.58219	6.48059	6.81319	6.79557	6.65016	4.42388	4.43705	6.03281
ENSNFUG00015020925	SURF4	0.0655684	1	-1.88083	0.0648683	-1.94639	0.0409313		4.18824	7.26179	6.88543	6.7447	6.82993	6.38517	4.3375	5.12546	5.02752
ENSNFUG00015004408	Nfu_g_1_011771	0.538861	1	-0.54906	0.49246	-1.08792	0.040968		6.52305	5.67173	5.87992	6.59711	6.3824	6.70298	5.32828	5.41394	5.83272
ENSNFUG00015011900	TMEM179B	-0.348678	1	0.800588	0.246154	1.14927	0.040968		5.66024	5.08293	4.97473	4.95947	4.76568	5.08582	6.18211	6.11117	5.60034
ENSNFUG00015010143	PRKAG1	0.269345	1	-1.25897	0.146282	-1.52832	0.040968		4.37971	5.99519	5.43671	5.72827	5.80115	5.49815	3.92858	4.28197	4.71464
ENSNFUG00015013216	ALDOB	0.595448	0.352374	1.23371	2.30587e-06	0.63826	0.0413818		11.8683	11.8773	11.5076	12.2626	12.3459	12.4525	12.9817	13.0892	12.904
CALR	NA	-1.17182	0.90193	-3.30316	0.0002396	-2.13134	0.0413818		4.28715	5.8245	5.5323	4.57372	4.56273	3.83786	2.95278	3.25084	2.61347
ENSNFUG00015007650	IDE	0.817382	1	-0.801666	0.526124	-1.61905	0.0413818		3.70658	4.00896	3.98804	4.57372	4.61621	4.50626	3.35577	3.40912	3.37284
ENSNFUG00015001055	FOXO3B	0.0223057	1	2.9201	0.0503584	2.89779	0.0413818		3.38794	2.61712	2.63813	2.83359	3.08101	2.76742	5.61202	5.17038	2.3391
CHST10	NA	-0.992301	1	0.558166	0.665444	1.55047	0.0414293		9.84329	7.83865	8.31178	7.96037	8.07171	7.80149	10.0336	9.30145	8.8743
ENSNFUG00015003631	MED19A	-0.320596	1	1.14114	0.165094	1.46174	0.0415781		5.02059	4.29708	4.05395	4.44149	3.87862	4.31592	5.84902	5.52186	4.93057
ENSNFUG00015022174	RPS17	-0.747316	1	0.633577	0.550643	1.38089	0.0418063		11.6832	9.94784	10.3645	10.157	10.2113	9.97819	11.9562	11.3896	10.9747
ENSNFUG00015015000	SLC20A1B	0.386388	1	-0.75221	0.31245	-1.1386	0.0421163		4.96192	5.76909	5.80534	5.91439	6.11157	5.76976	4.97472	4.82194	4.93057
ENSNFUG00015001589	PFDN6	-0.589903	1	0.48375	0.546848	1.07365	0.0424909		6.30435	5.61	5.50899	5.22383	5.31094	5.3404	6.53247	6.17867	6.12332
ENSNFUG00015015988	EIF3S6IP	-0.43826	1	0.60055	0.396824	1.03881	0.0430121		7.57201	6.60346	6.83945	6.68746	6.47215	6.72868	7.80448	7.79088	7.27147
ENSNFUG00015002976	EIF3EA	-0.0725894	1	0.697768	0.0947312	0.770357	0.0430211		7.38369	7.09905	7.11119	7.17773	7.04018	7.16498	7.95712	8.05915	7.58988
VEGFAB	NA	-0.720081	1	0.824444	0.419005	1.54452	0.0430957		4.69999	4.1312	3.91897	3.62558	3.78832	3.74016	5.4152	4.70469	4.5932
ENSNFUG00015018063	RPS16	-0.957798	0.942027	0.449461	0.715639	1.40726	0.0433288		11.2162	9.36683	9.7369	9.38656	9.4823	9.285	11.1964	10.6677	10.3817
ALG6	NA	-0.129596	1	-3.13148	0.0412344	-3.00188	0.0433607		2.40426	4.29708	4.67302	4.04561	4.04385	3.92936	2.39162	2.63405	2.3391
SELENOK	NA	-0.858299	0.699606	0.231529	0.83178	1.08983	0.0433946		7.83162	6.94923	7.05597	6.54972	6.61033	6.31903	7.95712	7.46106	7.1258
RHBDD1	NA	-0.909031	1	0.65069	0.566668	1.55972	0.0433946		4.90076	3.72822	4.58659	3.85083	3.58877	3.83786	5.32828	4.82194	4.82664
COX5B2	NA	-0.785475	1	0.780623	0.502751	1.5661	0.0433946		10.2404	8.45962	8.2286	8.3312	8.67964	8.45682	10.5275	9.99369	9.42989
ENSNFUG00015004963	IGFBP4	1.58477	0.498809	-0.412146	0.845994	-1.99691	0.0435938		2.71968	3.16708	3.60397	4.2172	4.5072	4.31592	2.69931	3.07302	3.21712
ENSNFUG00015021522	RPL3	-0.553812	1	0.591749	0.480848	1.14556	0.0435938		10.802	9.44405	9.80667	9.5857	9.54569	9.61974	11.0161	10.7633	10.3112
ENSNFUG00015022506	AGPS	0.670886	1	-2.60252	0.184927	-3.2734	0.0436217		2.40426	3.80369	3.60397	3.85083	4.04385	3.74016	2	2	2.8439
ENSNFUG00015005988	TXNDC11	0.355763	1	-2.31402	0.126096	-2.66978	0.0436217		2.40426	4.58069	4.34471	4.37053	4.44944	4.24646	2	3.07302	2.8439
ENSNFUG00015012831	BX004812.1	-0.0906806	1	0.972425	0.090572	1.06311	0.0436217		5.83388	5.11292	5.33433	5.37649	5.0249	5.613	6.13166	6.40225	6.47231
NDRG1A	NA	-0.239248	1	-2.0302	0.0232058	-1.79095	0.0440186		6.20665	7.91722	8.44056	7.48539	7.83849	7.29108	5.08488	5.07911	6.69526
RPL18A	NA	-0.321915	1	0.69547	0.289954	1.01739	0.0444393		11.4891	10.2715	10.7082	10.6101	10.5844	10.5777	11.8422	11.5628	11.3755
ENSNFUG00015006131	GABPA	-0.397695	1	1.43169	0.180272	1.82939	0.044455		5.73222	3.80369	3.91897	4.50912	4.32649	4.3822	6.47294	6.08794	5.28449
ENSNFUG00015016914	SLC40A1	0.949272	1	-1.1297	0.462084	-2.07897	0.0446842		4.62633	3.04797	5.13558	5.33981	5.2102	5.40558	3.1683	3.07302	4.31455
ENSNFUG00015008960	BX248510.1	-0.594676	1	0.84095	0.371073	1.43563	0.0446842		5.28274	4.1312	4.29106	4.13395	4.11987	4.17348	5.64836	5.29729	5.07365
ENSNFUG00015016932	HBEGFA	-0.205128	1	1.79661	0.0877787	2.00174	0.0446842		3.38794	2.91815	2.94649	2.83359	2.92022	3.11794	4.50538	4.43705	3.75902
ENSNFUG00015022711	VCP	0.202995	1	-1.54073	0.114215	-1.74373	0.0450371		4.37971	6.75376	6.88543	6.61257	6.67476	6.40124	4.50538	4.82194	5.39763
TPM4A	NA	-1.03107	0.295477	0.0283468	0.983266	1.05942	0.0450426		6.28053	6.0112	5.64351	5.00703	5.2102	4.91725	6.20668	6.11117	5.69192
ENSNFUG00015000360	PRKCSH	0.324353	1	-0.91941	0.239967	-1.24376	0.0451341		5.02059	5.56732	5.4612	5.5789	5.80115	5.64034	5.08488	4.50876	3.96887
ENSNFUG00015025089	NPM1A	0.183966	1	-1.30285	0.120083	-1.48681	0.0451341		5.07697	7.15055	7.09563	6.94113	7.01053	6.70298	5.32828	5.52186	5.60034
ACTR1B	NA	0.157991	1	-1.55117	0.101519	-1.70916	0.0453475		3.70658	5.40716	4.94029	5.05307	5.2102	4.72634	3.52165	3.55175	3.86776
ATP6V1D	NA	-0.840891	0.728846	0.23884	0.811745	1.07973	0.0456493		5.76691	5.25414	5.22413	4.7518	4.66777	4.62049	5.6838	5.68552	5.53588
ENSNFUG00015002924	ATF4B2	-0.904043	1	0.577575	0.615992	1.48162	0.046076		5.18352	4.95636	4.49464	4.2959	3.78832	4.31592	5.81746	5.58957	4.52842
ENSNFUG00015000633	Nfu_g_1_019081	-1.51597	0.748164	0.434811	0.810588	1.95079	0.0464104		5.92884	4.24388	3.98804	3.74259	3.78832	3.74016	5.6838	5.62227	4.46059
ENSNFUG00015021693	SNRNP70	-1.43254	0.965844	0.664732	0.696995	2.09727	0.0469411		5.13123	3.64858	3.60397	3.20385	3.47758	3.11794	5.37239	4.87717	3.86776
RER1	NA	0.191675	1	-1.9091	0.102878	-2.10077	0.0469411		3.38794	6.59287	5.25248	5.93912	5.97497	5.37336	3.67042	4.01277	4.23558
ENSNFUG00015001103	RPA2	0.105548	1	-2.16932	0.0814105	-2.27486	0.0471906		2.71968	5.02103	4.79367	4.44149	4.9848	4.24646	3.1683	2.87017	3.04255
RPS23	NA	-1.05169	0.961858	0.49391	0.724888	1.5456	0.0477215		10.5515	8.35687	8.86451	8.60676	8.54135	8.44911	10.5553	9.90345	9.57126
ENSNFUG00015023561	TOR3A	-0.282998	1	-1.56852	0.0131203	-1.28552	0.0477215		6.62111	6.08868	5.5323	5.41226	5.86881	6.21377	4.91632	4.50876	4.71464
IER2B	NA	-1.44271	1	0.767073	0.614936	2.20978	0.0482409		3.19764	3.72822	3.31237	2.83359	2.73925	2.55399	4.14748	4.1977	3.51337
PYGL	NA	0.950979	0.90193	-0.400569	0.755284	-1.35155	0.0483955		5.89788	6.95751	6.84876	7.43411	7.67172	7.59343	5.49718	5.80427	7.01194
RPS27.1	NA	-0.593113	1	0.734109	0.446864	1.32722	0.0483955		11.3502	9.61877	10.1105	10.0447	9.99752	9.82727	11.7527	11.1331	10.7979
COPS4	NA	0.429377	1	-1.05077	0.277436	-1.48015	0.0483955		4.54872	5.80626	5.72669	5.91439	5.80115	5.91115	3.92858	4.1977	5.20382
ENSNFUG00015007900	ITM1	0.0523827	1	-1.38303	0.0792614	-1.43542	0.0483955		5.5045	6.6451	6.78227	6.51724	6.63645	6.23186	4.24562	5.03121	5.7499
ATAD1B	NA	-0.0385041	1	-2.83248	0.0594387	-2.79398	0.0483955		2.40426	4.58069	4.44638	4.2172	4.19208	3.83786	2.39162	2.87017	2.3391
SLC30A6	NA	0.0312615	1	2.01085	0.057469	1.97959	0.0492293		3.38794	3.04797	3.07903	3.03057	3.47758	2.9533	4.85546	4.98167	3.51337
ENSNFUG00015016736	ANGPT1	-1.07492	1	1.67635	0.302794	2.75127	0.0494465		3.55604	2.77547	2.63813	2.60541	2.53227	2.55399	4.72543	4.10819	2.8439
ENSNFUG00015008558	TTC19	-0.206428	1	1.14501	0.135686	1.35144	0.0497864		4.54872	4.00896	4.49464	4.2172	4.26085	4.0966	5.84902	5.12546	4.87954
ENSNFUG00015015062	AAMDC	0.181319	1	1.01221	0.0160094	0.830889	0.0502602		5.86623	5.52335	5.50899	5.83754	5.73017	5.81845	6.58965	6.56247	6.58808
IGFALS	NA	1.07484	1	-0.556737	0.705115	-1.63157	0.0503555		5.18352	7.97141	7.44792	8.18894	8.50637	8.26816	6.301	6.79535	7.01194
NDUFS8	NA	-0.726854	0.704506	0.182072	0.84105	0.908926	0.050366		6.91202	6.31189	6.24696	5.75637	5.95435	5.74479	6.68018	6.62834	6.73886
PSD2	NA	-1.76849	0.982497	0.791551	0.679898	2.56004	0.050366		4.37971	2.77547	3.07903	2.60541	2.73925	2.55399	4.58252	3.91058	3.64142
CAPZA2	NA	0.504748	1	-0.873159	0.365289	-1.37791	0.050366		4.69999	5.75014	6.01843	6.1013	6.11157	6.01923	4.14748	4.70469	5.3609
ENSNFUG00015002384	CHAC1	-0.583192	1	0.72033	0.449321	1.30352	0.0504001		6.5432	7.12135	7.53127	6.87858	6.39775	6.35248	8.44419	7.76914	6.86227
MRPS28	NA	-0.589836	1	0.708272	0.426963	1.29811	0.0504001		4.96192	4.4922	4.23533	4.37053	3.9636	3.92936	5.32828	5.25622	4.93057
EIF3HA	NA	-0.124185	1	0.811998	0.13479	0.936183	0.0504001		7.72979	7.14331	7.02343	7.23877	7.29916	7.06764	8.3862	8.2333	7.65202
ENSNFUG00015018861	THEM6	0.140977	1	1.47733	0.0355767	1.33635	0.0504001		3.96742	4.24388	3.84643	4.13395	4.11987	4.17348	5.75218	5.03121	4.87954
ENSNFUG00015006209	EIF3G	-0.19992	1	0.567732	0.245337	0.767653	0.0505462		7.87996	7.33357	7.50794	7.52677	7.4017	7.22941	8.25096	8.20659	7.95901
PITPNB	NA	0.467015	1	-1.57862	0.227728	-2.04564	0.0509522		2.97836	4.58069	4.23533	4.50912	4.61621	4.31592	2.39162	3.25084	3.37284
EHD3	NA	0.85781	1	-1.60066	0.36382	-2.45847	0.0511046		3.38794	3.16708	3.31237	3.49822	4.04385	3.92936	2.69931	2.35158	2.61347
ENSNFUG00015002895	LASP1	0.471111	1	-0.943652	0.333509	-1.41476	0.051133		3.84289	4.95636	5.00837	5.183	5.24457	4.96127	3.92858	3.91058	4.06336
ZGC:112163	NA	-0.685628	1	0.436669	0.628245	1.1223	0.0512519		5.66024	4.88864	5.07338	4.69484	4.5072	4.67439	5.75218	5.55611	5.53588
5_8S_RRNA	NA	-1.93205	0.160931	-0.168685	0.932578	1.76337	0.0513593		12.1096	10.3325	9.39616	9.25485	9.42352	8.58194	11.4046	10.8996	10.045
DNAJC3A	NA	-0.215432	1	-2.288	0.0355767	-2.07257	0.0514706		3.19764	6.08868	5.43671	5.37649	5.24457	4.77649	3.35577	3.68153	3.51337
RPL22L1	NA	-1.44735	0.627798	0.267774	0.885737	1.71512	0.0515029		9.78314	7.35881	7.78036	7.32575	7.33149	7.22038	9.59793	8.80296	8.21199
ENSNFUG00015007606	Nfu_g_1_007614	-0.626561	1	-1.61178	0.000301262	-0.985218	0.0515029		13.0878	12.1419	13.0901	11.9431	12.1268	12.5038	11.4329	10.8735	11.315
ENSNFUG00015006550	ATAD3B	0.20711	1	-2.32695	0.108539	-2.53406	0.0520408		2.40426	4.704	4.29106	4.13395	4.56273	4.0966	2.95278	2.87017	2.3391
ENSNFUG00015022523	IDI1	-0.609414	1	-2.18292	0.00337321	-1.5735	0.0520408		7.21808	8.19461	8.78426	7.95432	7.73955	6.93041	5.91015	4.98167	6.80872
MAT1A	NA	2.28076	0.0137802	0.646152	0.646284	-1.63461	0.0521011		6.10186	8.10794	6.60673	9.2149	8.87876	10.0269	7.03608	7.68652	8.44921
SEC24D	NA	1.11204	0.699606	-0.301008	0.842543	-1.41305	0.0525306		4.28715	4.24388	4.86885	5.51454	5.34301	5.55672	3.52165	4.01277	4.87954
ENSNFUG00015003531	RPL37	-1.45402	0.704447	0.330134	0.85707	1.78416	0.0526099		8.9791	6.37511	6.88543	6.50072	6.59709	6.26736	8.77517	8.0651	7.45695
ENSNFUG00015000651	CLUH	0.790954	1	-1.99125	0.298081	-2.78221	0.0526406		2.40426	3.80369	3.31237	3.85083	4.04385	3.63536	2.69931	2.35158	2.3391
AP2M1A	NA	0.574026	1	-0.800904	0.425945	-1.37493	0.052718		5.83388	6.88986	7.1569	7.31634	7.34739	7.21129	5.18722	5.58957	6.69526
CCNL1A	NA	-0.636607	1	0.845546	0.421392	1.48215	0.052718		5.69668	4.66405	4.29106	4.2959	4.38928	4.62049	6.20668	5.71614	5.11836
ENSNFUG00015022339	SATL1	0.249023	1	1.27699	0.0153456	1.02797	0.052718		5.62285	5.30697	5.38643	5.54708	5.40509	5.97697	6.38953	6.3249	7.05857
DMGDH	NA	0.911371	0.527946	-0.113635	0.92449	-1.02501	0.0532468		6.04646	6.38743	6.73282	7.18809	7.36312	7.35023	5.99725	5.91398	6.83574
NAALADL1	NA	1.01634	0.889201	-0.428444	0.768302	-1.44478	0.0532468		3.70658	4.4922	4.71437	5.00703	5.27813	5.46795	3.52165	3.91058	4.52842
ENSNFUG00015011184	Nfu_g_1_011468	-0.59706	1	0.820992	0.428795	1.41805	0.0532468		10.3097	8.47413	9.74939	8.58733	9.18999	9.40342	10.4447	11.0566	9.7399
ENSNFUG00015009149	ADPRH	-0.371411	1	1.25881	0.207449	1.63022	0.0532468		4.90076	3.56429	3.6894	3.74259	3.58877	4.17348	5.49718	5.25622	4.71464
PFKFB4B	NA	-2.06495	0.00375487	-3.54927	2.33477e-09	-1.48432	0.053507		8.26074	7.12871	6.5846	5.44716	5.75422	5.3404	4.04218	4.50876	4.15204
VANGL2	NA	1.82512	0.889201	3.72532	0.000548613	1.9002	0.053507		2.97836	2.61712	2	2.83359	3.08101	3.92936	4.97472	4.7645	4.5932
ENSNFUG00015001081	CNPY4	-0.827233	1	0.969858	0.42458	1.79709	0.0543012		3.70658	3.16708	4.11698	3.49822	2.73925	3.2657	4.65575	4.43705	4.23558
ENSNFUG00015021757	PURA	-0.999904	1	0.616045	0.632832	1.61595	0.0545362		4.83689	4.4922	3.51316	3.49822	3.78832	3.52235	5.23579	4.7645	4.52842
ENSNFUG00015022491	S100V2	-0.932109	0.666808	0.182502	0.878546	1.11461	0.0546689		7.86402	6.92408	6.89445	6.50072	6.50086	6.15811	7.78012	7.59887	6.90117
UBE2G2	NA	-0.353892	1	0.652681	0.333081	1.00657	0.0546689		5.23399	4.98906	5.10482	4.69484	4.81224	4.87184	5.53648	5.91398	5.60034
HPXA	NA	0.975103	1	-0.529521	0.697465	-1.50462	0.0546962		13.5847	14.2496	14.8938	15.1737	15.4651	15.2907	12.8003	12.9897	14.7645
C8A	NA	1.01786	0.126563	0.127436	0.901499	-0.89042	0.0549238		7.00213	7.54077	7.66382	8.32182	8.41879	8.55706	7.26393	7.3385	7.96514
ENSNFUG00015021511	SHMT2	0.872819	1	-0.657173	0.616361	-1.52999	0.0549238		4.54872	5.2808	5.36061	5.75637	5.91221	6.06029	3.80526	3.80059	5.39763
ENSNFUG00015009840	ACSF2	0.368123	1	-0.662308	0.365289	-1.03043	0.0549238		7.14083	7.5073	7.72579	7.71037	7.88825	7.91778	6.25461	6.57922	7.41277
ENSNFUG00015011586	RPS15	-0.610103	1	0.626451	0.526124	1.23655	0.0555868		11.2233	9.60829	9.95528	9.84977	9.87261	9.76498	11.4853	10.9178	10.6583
ENSNFUG00015011322	RPLP1	-1.18472	0.882622	0.387509	0.80835	1.57223	0.0556122		10.8931	8.61958	9.02923	8.71455	8.7531	8.62021	10.7704	10.185	9.58526
NDUFA1	NA	-1.10317	0.62843	0.184717	0.899464	1.28789	0.0557067		8.51656	7.01422	7.03979	6.59711	6.85239	6.40124	8.209	7.81936	7.54145
GTF2A2	NA	-1.21475	0.821667	0.341246	0.814851	1.55599	0.0561896		4.46669	4.62297	4.17737	3.35853	3.78832	3.39972	5.28277	4.3616	4.31455
ENSNFUG00015022132	FDPS	-2.80957	0.847216	-6.79455	0.000179061	-3.98498	0.0561896		4.46669	9.45725	5.84312	5.86362	5.6555	3.74016	2.95278	2.63405	2.3391
SI:CH211-191J22.3	NA	-0.885831	1	0.468708	0.694405	1.35454	0.0567413		6.25632	4.9229	4.90501	4.85937	4.56273	4.67439	6.15711	5.91398	5.63151
PUS7	NA	-0.0218231	1	-1.84846	0.0701584	-1.82663	0.0569815		3.70658	4.58069	4.54135	4.44149	4.5072	4.01541	3.52165	2.63405	3.04255
ERGIC3	NA	0.21719	1	-2.99428	0.111925	-3.21147	0.0577767		2	4.29708	3.84643	3.9515	3.9636	3.63536	2.39162	2.35158	2.3391
GRHPRA	NA	-0.190521	1	1.17652	0.147106	1.36704	0.0578319		5.02059	4.07137	3.98804	4.37053	4.19208	4.17348	5.84902	5.07911	5.20382
C4B	NA	1.37172	0.00264425	0.512152	0.433634	-0.859565	0.057985		7.00213	6.41175	6.99854	8.17859	8.39604	7.87238	7.20416	7.58235	7.13671
UBL5	NA	-0.510142	1	0.690101	0.425945	1.20024	0.057985		5.54504	4.66405	5.07338	4.50912	4.56273	4.91725	5.99725	5.88733	5.24472
ENSNFUG00015007956	C22H6ORF89	0.501729	1	-1.67526	0.248824	-2.17699	0.057985		3.38794	3.56429	3.84643	4.13395	3.78832	4.01541	2.39162	2.35158	3.21712
ENSNFUG00015015707	ISCU	-0.0378982	1	0.709411	0.100886	0.747309	0.057985		7.20549	6.71518	7.03979	7.05865	6.72431	7.06764	7.76365	7.67877	7.61349
BCAT2	NA	-0.0539358	1	1.14744	0.0947312	1.20137	0.0580207		4.77006	4.18864	4.11698	4.2959	4.26085	4.3822	5.64836	5.17038	5.16172
GCK	NA	-4.77736	0.415876	-10.71	6.42227e-05	-5.93265	0.0585211		4.08205	10.7494	8.30164	4.95947	5.6555	2.30343	2	2.35158	2
SOD3	NA	1.29975	0.704506	-0.323864	0.854949	-1.62361	0.0585211		3.38794	4.18864	4.86885	5.33981	5.49348	5.40558	3.1683	3.91058	4.65519
GLG1	NA	0.945976	1	-1.82912	0.371377	-2.77509	0.0585211		2.40426	3.64858	3.20041	3.85083	3.78832	3.83786	2	2.35158	2.8439
METAZOA_SRP	NA	-1.34873	1	0.8401	0.638843	2.18883	0.0589102		5.13123	3.47476	3.20041	3.49822	2.92022	3.2657	5.53648	4.64229	3.96887
ENSNFUG00015008711	RPL26	-0.60517	1	0.511932	0.582273	1.1171	0.0589102		9.51122	8.08543	8.54166	8.31239	8.26825	8.12551	9.68359	9.31401	8.94115
ENSNFUG00015015702	VDRB	1.78845	0.898003	-0.975535	0.725306	-2.76399	0.0589136		3.38794	2	3.20041	3.9515	3.87862	4.31592	2.39162	2.35158	2.8439
ENSNFUG00015018459	CCT4	-0.669413	0.942027	0.261903	0.774625	0.931315	0.0589421		6.97271	6.25924	6.40684	5.91439	5.95435	5.93342	7.10306	6.80962	6.48943
ENSNFUG00015014561	SF3B14	-0.435808	1	0.381114	0.566428	0.816921	0.0597922		6.62111	6.31189	6.06712	5.96344	5.89068	5.93342	6.79808	6.73683	6.5721
ENSNFUG00015021233	DDT	-0.360044	1	0.471811	0.454627	0.831855	0.0597922		7.63908	6.8548	7.03979	6.82651	6.8412	6.90809	7.75535	7.73964	7.49982
CCND2A	NA	-0.911168	0.942027	0.347484	0.774625	1.25865	0.05982		5.89788	5.50085	5.19522	4.57372	4.9011	4.72634	6.49306	5.55611	5.28449
RCL1	NA	-0.15378	1	1.25723	0.142117	1.41101	0.0604431		6.65854	4.53712	5.4612	5.54708	5.46462	5.88853	7.03608	6.99582	6.9139
ENSNFUG00015018134	OLA.23000	0.0688446	1	-1.16571	0.108539	-1.23455	0.0604431		4.96192	5.89522	5.57782	5.5789	5.62973	5.613	4.14748	4.1977	5.02752
ENSNFUG00015014638	pcna	-0.265194	1	-2.477	0.0409341	-2.21181	0.0604738		4.77006	7.68746	6.82064	6.26675	7.27442	5.88853	2.69931	5.21394	4.82664
ENSNFUG00015005054	MED11	-0.611458	1	0.487954	0.57787	1.09941	0.0605579		5.32991	4.88864	4.79367	4.44149	4.71755	4.24646	5.57475	5.3761	5.3609
SLC35B1	NA	0.231085	1	-2.58376	0.128207	-2.81484	0.0606037		2	5.22698	4.05395	4.57372	4.71755	4.0966	2.39162	3.07302	2.61347
ENSNFUG00015009113	INTS9	-1.38241	0.944397	0.523248	0.770099	1.90566	0.0607231		5.32991	3.80369	3.84643	3.49822	3.22565	3.63536	5.45677	4.98167	3.96887
USO1	NA	0.637148	1	-2.19545	0.248824	-2.83259	0.0608828		2.40426	4.53712	3.07903	4.37053	4.32649	3.52235	2.39162	2.87017	2.3391
TFR2	NA	0.890147	0.846452	-0.263957	0.834448	-1.1541	0.0610292		5.32991	5.56732	5.98503	6.53357	6.57025	6.38517	4.65575	5.25622	6.00926
PDIA6	NA	-0.619624	1	-1.94689	0.00239997	-1.32727	0.0610578		7.24293	8.64802	8.25336	7.75284	7.85527	6.86239	5.64836	6.11117	6.80872
ENSNFUG00015001434	RPS19	-1.08221	0.90193	0.367318	0.806091	1.44952	0.0611275		10.6593	8.46544	8.96857	8.61829	8.73206	8.46831	10.4395	10.0246	9.55306
GLO1	NA	-0.784932	1	0.348263	0.755069	1.1332	0.0611275		7.50166	6.38743	6.30225	6.14447	6.0546	6.03991	7.54017	7.03278	6.83574
ENSNFUG00015019584	GCLC	0.978139	1	-1.11487	0.530313	-2.09301	0.0611275		2.71968	3.64858	3.51316	4.2172	4.04385	3.92936	2.39162	2.87017	3.04255
G6PC1A.2	NA	-0.648074	1	0.712399	0.519619	1.36047	0.0611275		10.4091	8.65058	9.76053	8.90233	9.28386	9.17713	11.0707	10.4618	9.52428
ENSNFUG00015000795	CABZ01079427.1	-0.363994	1	0.728587	0.333783	1.09258	0.0611275		5.37558	5.30697	4.63045	4.63555	4.76568	5.00399	5.75218	6.04034	5.53588
ENSNFUG00015025232	TWISTNB	-0.431379	1	0.915257	0.311454	1.34664	0.0611275		4.54872	3.80369	4.17737	3.74259	3.78832	4.01541	5.18722	4.98167	4.5932
ENSNFUG00015018464	PPAP2B	0.345434	1	-0.901467	0.30669	-1.2469	0.0611275		4.46669	4.78072	4.79367	5.05307	5.06391	4.87184	4.3375	3.80059	3.75902
ENSNFUG00015000772	CANX ENSNFUG00015000772	0.0424764	1	-1.20737	0.0997845	-1.24985	0.0611275		5.69668	7.11396	7.17922	6.87858	6.97002	6.70298	5.37239	5.3761	6.12332
ENSNFUG00015020315	P4HB	0.253659	1	-0.398339	0.419185	-0.651998	0.0611278		8.5368	8.61173	8.43748	8.73588	8.71989	8.88309	7.93523	8.03506	8.39573
ENSNFUG00015024965	SRM	0.0156611	1	-1.72718	0.0893036	-1.74284	0.0611278		3.38794	5.61	5.33433	5.09769	5.24457	4.91725	3.52165	3.68153	3.86776
SRP72	NA	-0.0504793	1	-1.4432	0.068852	-1.39272	0.0613235		4.37971	5.89522	5.43671	5.44716	5.49348	5.04549	4.04218	4.28197	4.15204
ENSNFUG00015012605	NDUFA6	-0.693275	1	0.330211	0.741845	1.02349	0.0613473		8.1534	7.21417	6.88543	6.8397	6.85239	6.82713	8.00694	7.82639	7.6596
ENSNFUG00015002524	AASDHPPT	1.63517	0.149426	2.79991	4.83347e-06	1.16474	0.0613534		3.19764	3.47476	3.07903	4.44149	4.11987	4.67439	5.45677	5.52186	5.3232
ENSNFUG00015021222	ZC3H13	-1.58589	1	0.745967	0.697465	2.33186	0.0613534		4.37971	3.27709	3.07903	2.83359	2.73925	2.76742	4.91632	4.01277	3.21712
PIGF	NA	-0.574725	1	0.781982	0.432247	1.35671	0.0613534		5.32991	4.07137	4.63045	4.04561	4.11987	4.56451	5.4152	5.71614	5.07365
ARL15A	NA	-1.54097	1	0.765464	0.699178	2.30644	0.0624182		4.96192	3.37931	2.94649	2.83359	3.22565	2.9533	4.79191	5.07911	3.51337
EEF1DA	NA	-0.685123	1	0.515669	0.616361	1.20079	0.0625449		7.03096	5.80626	5.84312	5.86362	5.60349	5.58513	7.1545	6.87891	6.32751
SNORA81	NA	-4.05988	0.425951	0.103428	0.980758	4.16331	0.0627425		5.02059	2.61712	2.45509	2	2.53227	2	4.42388	2.63405	4.15204
ENSNFUG00015002035	GABARAPA	0.032377	1	0.797933	0.0692958	0.765556	0.0629487		7.40587	6.74421	6.95608	7.1568	6.89628	7.18368	7.73859	7.87469	7.87682
PFKL	NA	1.80384	0.344118	-0.0244147	0.99147	-1.82825	0.063206		2.97836	3.80369	2.80053	4.44149	5.06391	4.0966	3.35577	3.25084	3.21712
ENSNFUG00015002731	CARHSP1	-0.326913	1	0.456933	0.446864	0.783847	0.063206		8.09998	7.42604	7.43561	7.31634	7.37092	7.39906	8.28597	8.10614	7.98941
ENSNFUG00015003000	RPL19	-0.324965	1	0.65593	0.358991	0.980895	0.063206		10.0352	8.90094	9.09332	9.15546	9.15654	9.0064	10.4094	9.94928	9.82496
ENSNFUG00015006835	GMPPB	0.0389669	1	-1.92731	0.0969247	-1.96628	0.063206		2.97836	5.7878	5.50899	5.30218	5.49348	4.82495	3.35577	3.80059	3.75902
CAHZ	NA	-0.173112	1	-1.28644	0.0353102	-1.11333	0.063206		6.07442	5.40716	6.2185	5.64052	5.68082	5.97697	4.97472	4.3616	4.93057
SSR2	NA	-1.4005	0.483665	0.0586461	0.977329	1.45914	0.0647364		10.0824	8.28627	8.08624	7.84078	7.81009	7.52907	9.65708	9.1499	8.48806
RANBP1	NA	0.250984	1	-1.49895	0.18236	-1.74993	0.0647364		3.70658	6.1478	5.78608	5.64052	6.13007	5.49815	3.67042	4.10819	4.77173
ENSNFUG00015005455	AP1M1	0.14143	1	-2.75342	0.114988	-2.89485	0.0647364		2.40426	4.44584	3.91897	4.13395	4.19208	3.39972	2.95278	2	2.3391
ENSNFUG00015014351	UBA5	-0.110568	1	-2.47554	0.0693555	-2.36497	0.0648807		2.40426	5.61	4.97473	4.7518	5.06391	4.3822	2.69931	3.40912	3.04255
ENSNFUG00015016773	F8A2	-1.98043	0.393486	0.0150151	0.99306	1.99545	0.0649617		5.54504	3.72822	3.84643	3.35853	3.22565	2.9533	5.03085	4.57707	4.06336
INHBC	NA	-2.71863	0.393486	-6.88939	0.000351396	-4.17076	0.0649617		2.97836	4.62297	5.72669	2.83359	3.47758	2.30343	2	2	2
ENSNFUG00015019629	PPP2R1B	0.372768	1	-1.01234	0.307741	-1.38511	0.0649617		3.84289	5.25414	4.83175	5.183	5.06391	5.08582	4.04218	3.80059	4.06336
CYP4V2A	NA	0.325984	1	-0.532454	0.419005	-0.858438	0.0651167		7.91904	7.62641	7.87911	8.08196	8.11415	8.2009	6.95136	6.94503	7.79657
ENSNFUG00015013943	SLC33A1	0.506324	1	-1.66226	0.272274	-2.16858	0.0652215		2.40426	4.39794	4.05395	4.44149	4.38928	3.92936	2.95278	2.87017	2.8439
CHDH	NA	0.961846	1	-0.62973	0.680966	-1.59158	0.0658667		3.19764	4.24388	4.49464	4.80658	5.06391	4.82495	3.52165	3.07302	4.15204
WDR1	NA	0.445683	1	-1.23013	0.307741	-1.67581	0.0658667		3.19764	4.66405	4.83175	4.91029	4.9011	4.56451	3.1683	3.40912	3.86776
BIN2A	NA	1.218	1	2.90853	0.00199964	1.69052	0.0658667		3.38794	2.61712	2.45509	3.49822	3.22565	3.63536	5.23579	4.28197	4.52842
ANGPTL4	NA	-1.4214	1	-4.01964	0.00142752	-2.59824	0.0662607		6.78238	3.94373	4.97473	4.57372	4.44944	4.31592	2.39162	2	3.51337
ENSNFUG00015013143	PSMD11B	0.066071	1	-2.78423	0.103028	-2.8503	0.0666445		2	5.2808	3.84643	4.2959	4.56273	4.0966	2.39162	2.63405	2.8439
TGFB1A	NA	-0.668275	1	1.00881	0.395136	1.67708	0.0669342		4.28715	3.27709	3.51316	3.35853	3.22565	3.2657	4.79191	4.57707	3.96887
ENSNFUG00015010997	VPS29	-0.388491	1	0.379778	0.552216	0.768269	0.0669489		6.58268	6.19061	6.30225	5.93912	6.07384	5.95536	6.87675	6.67584	6.60389
RIDA	NA	-0.630421	1	0.437203	0.654057	1.06762	0.0678399		9.31128	8.1301	7.9758	7.85385	8.09072	7.97795	9.2738	9.04528	8.73052
ENSNFUG00015010687	RPL34	-1.1253	0.942027	0.386956	0.809311	1.51226	0.0680883		11.2442	8.90951	9.47647	9.20219	9.22052	8.90298	11.1795	10.4333	9.99942
RPS26	NA	-0.958374	1	0.409096	0.771201	1.36747	0.0684991		10.6336	8.58791	9.1752	8.72525	8.92717	8.6708	10.6298	10.0061	9.58526
ENSNFUG00015008134	POR	1.09284	0.742423	-0.205969	0.894622	-1.29881	0.0699113		5.02059	6.6348	6.96468	7.40777	7.42436	7.62114	6.02516	5.86017	6.68043
ENSNFUG00015010501	OLA.16560	0.388782	1	-0.976853	0.325915	-1.36563	0.0699113		8.32034	8.51119	8.82258	8.72169	9.14749	8.95562	6.07939	7.34831	8.46228
PRMT5	NA	-0.0210964	1	-2.64187	0.0926744	-2.62077	0.0699531		2	4.74287	4.49464	4.13395	4.26085	4.0966	2.69931	2.63405	2.61347
ENSNFUG00015003781	UBTD1A	-1.71476	1	1.53701	0.528617	3.25176	0.0699722		3.55604	3.04797	2.94649	2.33423	2.73925	2.30343	5.37239	3.55175	2
SERP1	NA	-0.206381	1	0.468726	0.342567	0.675107	0.0704967		9.24823	8.65822	8.96643	8.84787	8.80583	8.65078	9.44107	9.58262	9.28299
RPL38	NA	-1.52415	0.671483	0.20292	0.923444	1.72707	0.0716463		10.5111	7.54077	8.35164	7.7598	8.19984	7.50696	10.0302	9.53404	8.90333
ENSNFUG00015005922	ADPGK2	0.202599	1	-1.58608	0.172511	-1.78868	0.0716463		3.55604	3.87541	4.23533	4.13395	4.19208	3.92936	2.95278	2.87017	3.04255
ENSNFUG00015008045	HSD3B2	1.06185	1	3.00718	0.00933149	1.94533	0.0716463		3.19764	2.43922	2.24542	3.03057	2.92022	3.2657	4.14748	3.91058	4.93057
ENSNFUG00015022209	Nfu_g_1_022963	0.701981	1	-0.720245	0.557451	-1.42223	0.0719154		4.96192	5.86029	6.0987	6.12305	6.61033	6.38517	4.14748	4.57707	5.8854
ENSNFUG00015000746	TMEM134	-0.357484	1	1.09379	0.266789	1.45127	0.0719183		4.54872	3.87541	3.91897	3.74259	3.9636	3.83786	5.18722	5.45082	4.15204
ENSNFUG00015020238	RPS28	-0.906	1	0.429761	0.755069	1.33576	0.0722286		12.0346	9.9582	10.6102	10.2138	10.5104	9.90963	11.9356	11.5201	11.1261
GPATCH8	NA	-1.66999	1	0.791846	0.699841	2.46183	0.0722286		4.37971	2.77547	2.80053	2.60541	2.73925	2.55399	4.24562	4.28197	3.37284
MANBAL	NA	-0.606465	1	0.599348	0.54397	1.20581	0.0722343		5.18352	4.34839	4.49464	4.2959	4.04385	4.24646	5.45677	5.21394	4.93057
ENSNFUG00015016026	SACM1L	0.519029	1	-1.45066	0.316174	-1.96969	0.0723647		2.71968	4.44584	4.44638	4.69484	4.38928	4.44556	2.39162	3.25084	3.51337
ENSNFUG00015003124	RPL12	-0.789963	1	0.314914	0.788629	1.10488	0.0724422		9.77037	8.24963	8.58689	8.30289	8.30127	8.10603	9.60949	9.31401	9.01985
ENSNFUG00015014467	Nfu_g_1_010632	-0.700023	1	0.619773	0.59246	1.3198	0.0724422		8.49085	8.80778	10.2276	8.47766	8.974	8.57488	10.4904	9.26309	10.0039
ZGC:171772	NA	-0.589434	1	0.615059	0.552741	1.20449	0.0725591		11.7274	10.056	10.4481	10.4135	10.3598	10.2452	12.006	11.4091	11.0502
ENSNFUG00015013110	EPHX1L	0.50427	1	-0.742612	0.461739	-1.24688	0.0725591		5.92884	6.29891	6.35549	6.54972	6.74845	6.76639	4.58252	5.03121	6.32751
MAX	NA	0.290022	1	-1.11907	0.256439	-1.4091	0.0725591		4.46669	4.29708	5.04124	4.80658	4.85736	5.00399	2.95278	4.10819	3.96887
ENSNFUG00015016791	TIPARP	-0.545214	1	1.89636	0.222312	2.44158	0.0725591		3.19764	2.77547	2.63813	2.83359	2.53227	2.55399	4.85546	3.55175	3.04255
ACTR3	NA	0.432428	1	-2.24579	0.220571	-2.67822	0.0725591		2	4.44584	4.44638	4.2172	4.44944	4.3822	2	2.63405	3.21712
ENSNFUG00015002614	FDX1	0.115395	1	1.1882	0.0600358	1.0728	0.0737812		7.01662	6.21845	5.91582	6.1013	6.30309	7.07768	7.46066	7.58235	7.74047
ENSNFUG00015017804	COMMD8	-0.31192	1	0.70929	0.342567	1.02121	0.0740265		6.39584	5.5455	5.43671	5.54708	5.54954	5.55672	6.86136	6.34463	6.24927
ENSNFUG00015010995	Nfu_g_1_009250	0.37897	1	-0.589937	0.445602	-0.968907	0.0749319		7.50166	8.26973	7.9969	8.18377	8.41125	8.39396	6.87675	7.09234	7.94045
ENSNFUG00015007813	PDIA5	0.00669145	1	-1.30483	0.103828	-1.31153	0.0749319		4.18824	5.08293	5.28028	5.00703	5.0249	4.82495	3.67042	3.91058	4.06336
ENSNFUG00015010807	FABP1	0.395025	1	3.18644	0.0577631	2.79142	0.0749319		2.97836	2.61712	2.45509	2.60541	2.73925	3.11794	4.97472	2	5.39763
ENSNFUG00015017425	AMD1	-0.869995	1	-3.36624	0.0116629	-2.49625	0.0749319		3.84289	6.05818	3.51316	4.04561	4.44944	4.17348	2.69931	2.35158	3.04255
ENSNFUG00015024370	TCF21	-1.18817	1	0.943772	0.557589	2.13195	0.0752158		3.84289	3.16708	2.80053	2.60541	2.73925	2.76742	4.3375	3.80059	3.51337
ENSNFUG00015024177	PSMD9	-0.553438	1	0.541872	0.557451	1.09531	0.0756714		6.10186	4.9229	5.22413	4.95947	4.85736	5.12505	5.93978	5.88733	6.10122
RPL22	NA	-0.455805	1	0.593129	0.49246	1.04893	0.0756714		9.53406	8.10048	8.5185	8.5069	8.38067	8.28558	9.7415	9.37525	9.11668
ENSNFUG00015021302	NXPE3	-0.40041	1	1.19566	0.268548	1.59607	0.0767406		3.96742	3.47476	3.31237	3.35853	3.47758	3.11794	4.58252	4.82194	3.86776
RPL24	NA	-0.513781	1	0.442808	0.604166	0.956589	0.0767498		9.55901	8.33478	8.60899	8.44781	8.45593	8.36147	9.64589	9.25789	9.16276
ENSNFUG00015012207	BX640584.1	-1.98326	0.671513	0.235283	0.91974	2.21855	0.0768139		4.62633	3.47476	2.94649	2.60541	2.73925	2.76742	4.14748	4.1977	3.51337
RPS20	NA	-0.901942	1	0.382742	0.778475	1.28468	0.0768139		12.2291	10.2962	10.7896	10.4887	10.5271	10.3232	12.1944	11.6165	11.2124
KPNA4	NA	0.771327	1	-0.912646	0.538973	-1.68397	0.0768139		2.71968	4.88864	4.39644	5.00703	5.06391	4.72634	3.67042	3.55175	3.64142
ADSL	NA	-0.422125	1	0.59477	0.451813	1.0169	0.0768139		5.07697	4.704	4.94029	4.37053	4.38928	4.82495	5.37239	5.41394	5.50254
MTR	NA	0.412107	1	-2.14627	0.230374	-2.55838	0.0768139		2.71968	3.56429	3.6894	3.74259	3.69199	3.63536	2.39162	2.87017	2
RAB5IF	NA	-0.135458	1	-2.70562	0.08151	-2.57016	0.0768139		2.40426	5.58882	3.98804	4.44149	4.81224	3.92936	2.39162	3.07302	2.8439
ENSNFUG00015019207	ATP6V1F	-1.243	0.594781	0.092176	0.956609	1.33518	0.0774916		4.77006	4.39794	4.97473	3.85083	3.9636	3.39972	5.13695	4.87717	4.31455
ATP6V0C	NA	-1.70183	0.974799	0.548724	0.788629	2.25056	0.0775116		4.18824	3.04797	3.07903	2.60541	2.53227	2.76742	3.80526	4.28197	3.37284
ENSNFUG00015013349	IMP4	-0.743812	1	0.272411	0.797283	1.01622	0.0778736		5.89788	5.22698	5.30756	4.80658	4.85736	4.82495	5.9688	5.83249	5.3609
ENSNFUG00015012112	PDAP1A	0.149427	1	-1.8983	0.152738	-2.04773	0.0778736		2.97836	4.1312	4.23533	3.85083	4.11987	4.0966	2.39162	2.63405	3.21712
ENSNFUG00015006573	PDDC1	-0.715996	1	1.02657	0.433634	1.74257	0.078963		3.96742	2.91815	4.11698	3.03057	3.08101	3.63536	4.79191	4.70469	3.96887
ENSNFUG00015021355	COMTD1	0.432137	0.902451	0.979908	0.000313818	0.547772	0.0790823		10.0244	9.80132	9.90816	10.2831	10.2489	10.4884	10.8477	10.7706	11.0394
ENSNFUG00015022297	LMNB2	0.515611	1	-1.80092	0.292265	-2.31653	0.0792477		2.40426	4.29708	3.77005	3.85083	4.5072	3.83786	2.69931	3.07302	2.3391
ENSNFUG00015024419	SAS	0.317928	1	-1.70008	0.227728	-2.01801	0.0793484		2.40426	5.33268	4.75457	4.91029	4.85736	4.91725	3.1683	3.25084	3.64142
CPNE8	NA	-2.01077	0.982497	0.643857	0.797283	2.65463	0.0799909		4.54872	2.77547	2.63813	2.60541	2.53227	2.55399	4.58252	3.91058	3.21712
CTSO	NA	-0.594382	1	0.99917	0.41845	1.59355	0.0799909		5.23399	3.27709	3.98804	3.9515	3.69199	4.01541	5.4152	5.21394	4.93057
RUVBL2	NA	0.199221	1	-1.32348	0.206181	-1.5227	0.0799909		4.08205	5.47799	4.63045	5.41226	4.9011	4.72634	3.1683	4.1977	3.86776
ZGC:77739	NA	2.35512	0.0599034	0.631203	0.734281	-1.72392	0.0811666		2.97836	4.24388	4.29106	6.94113	4.71755	5.46795	4.04218	4.64229	4.65519
ENSNFUG00015013813	EIF3B	0.655575	1	-0.438569	0.682746	-1.09414	0.0811666		5.32991	6.66547	6.55076	6.94113	6.92835	6.94144	5.53648	5.68552	6.32751
PSMD13	NA	-0.110466	1	-1.67398	0.0792614	-1.56351	0.0811666		3.84289	5.56732	4.79367	4.85937	5.0249	4.56451	3.52165	3.40912	3.86776
ARF1	NA	-0.199571	1	-1.41437	0.0478418	-1.2148	0.0811666		5.02059	6.54967	6.15984	5.88923	6.11157	5.55672	4.91632	4.7645	4.65519
ENSNFUG00015004753	NARS	-0.377846	1	-2.24524	0.0380125	-1.8674	0.0811666		3.55604	5.08293	5.62194	4.7518	4.81224	4.44556	2.39162	3.68153	3.51337
LTV1	NA	-0.463083	1	0.524651	0.526154	0.987734	0.0817315		5.5045	5.02103	4.86885	4.7518	4.56273	4.87184	5.49718	5.77549	5.53588
ENSNFUG00015010861	FAUA	-0.347586	1	0.659175	0.412558	1.00676	0.0829067		10.0633	8.76121	8.93617	9.09347	9.03908	8.95017	10.343	9.97165	9.70368
MRPS6	NA	-0.833689	1	0.422289	0.742641	1.25598	0.082943		6.35082	5.11292	5.07338	4.7518	4.9011	4.96127	6.38953	6.06434	5.43346
MTFR1L	NA	0.322995	1	-1.67388	0.239967	-1.99687	0.0831506		2.97836	4.24388	3.6894	3.74259	4.11987	4.0966	2.69931	2.63405	3.04255
ENSNFUG00015006188	CDH2	1.06864	0.882622	-0.288504	0.85707	-1.35714	0.0832341		3.70658	4.00896	4.75457	5.183	4.9848	5.27213	3.67042	3.68153	4.52842
ESR2A	NA	0.742433	1	-0.928448	0.535648	-1.67088	0.0832341		3.38794	4.18864	4.49464	4.44149	4.71755	4.96127	2.95278	2.87017	4.15204
LRP1	NA	0.0669958	1	1.7462	0.0947312	1.67921	0.0836187		3.84289	2.91815	2.94649	3.35853	3.08101	3.39972	4.85546	4.57707	3.86776
ENSNFUG00015018076	HHIPL1	0.955603	0.641403	-0.0844227	0.95477	-1.04003	0.0837875		5.58447	5.76909	6.17473	6.59711	6.73643	6.97404	5.08488	5.62227	6.36509
CYP27A3	NA	0.939613	1	-0.858318	0.606338	-1.79793	0.0837875		2.97836	4.62297	5.28028	5.33981	5.2102	5.66717	3.67042	3.07302	4.5932
ENSNFUG00015004974	TTC36	0.173069	1	1.09168	0.045137	0.918607	0.0842301		7.55226	7.49596	6.32911	7.39889	7.45403	7.30823	8.33138	8.33049	8.20683
ENSNFUG00015022047	EDC3	-2.49706	0.7657	0.349127	0.909242	2.84619	0.085924		4.77006	2.23626	3.07903	2.60541	2.29055	2.55399	4.3375	3.91058	3.51337
ENSNFUG00015015651	ALG5	-0.105591	1	-1.76935	0.087978	-1.66376	0.085924		4.28715	6.25924	6.17473	5.78394	5.91221	5.4371	2.95278	4.64229	4.65519
GLTPD2B	NA	0.284065	1	1.25444	0.0273032	0.970378	0.0861234		4.54872	4.58069	4.67302	4.7518	4.71755	5.04549	5.81746	5.94016	5.3232
ENSNFUG00015017795	DNAJA2L	-0.0841482	1	-2.1789	0.0967538	-2.09475	0.0863354		2.97836	4.74287	4.05395	4.13395	4.11987	3.92936	2.39162	2.63405	3.21712
ERP44	NA	0.12997	1	-1.71852	0.165094	-1.84849	0.0865842		3.55604	6.4938	5.76655	5.98735	6.01533	5.4371	3.1683	4.70469	4.38941
ONECUT2	NA	-1.44027	0.99278	0.457535	0.824723	1.89781	0.0867776		5.76691	3.56429	3.60397	3.35853	3.47758	3.83786	5.4152	5.07911	4.5932
ENSNFUG00015007665	HDDC3	-0.402603	1	0.627348	0.441823	1.02995	0.0868567		4.96192	4.8176	4.58659	4.63555	4.5072	4.17348	5.53648	5.33723	5.11836
ENSNFUG00015009271	EIF4EBP1	0.0940295	1	1.28505	0.08326	1.19102	0.0868567		8.09316	6.95751	6.18947	7.35361	7.08828	7.6348	8.81967	8.37434	8.40479
ACIN1B	NA	-1.9138	0.584127	0.0604186	0.983266	1.97422	0.0869755		6.60202	4.29708	3.91897	3.74259	3.9636	3.83786	6.02516	5.58957	4.46059
ENSNFUG00015018187	SRP9	-0.974508	0.621946	0.0583945	0.969764	1.0329	0.0869755		8.05858	7.13603	6.81114	6.53357	6.71208	6.15811	7.81251	7.36772	7.21083
ENSNFUG00015025404	MCOLN2	0.898197	0.998986	-0.3349	0.814851	-1.2331	0.0869755		3.96742	5.05232	4.86885	5.26353	5.6555	5.613	3.92858	4.28197	4.93057
ENSNFUG00015020475	ATP5SL	-1.23052	1	0.457977	0.790113	1.6885	0.0869755		4.62633	4.4922	3.41626	3.74259	3.22565	3.11794	4.97472	4.87717	3.75902
PTGESL	NA	0.195462	1	-1.93002	0.184927	-2.12548	0.0869755		2.40426	4.53712	4.63045	4.44149	4.38928	4.17348	2.39162	3.25084	3.04255
ENSNFUG00015021920	SNRNP40	-1.45547	0.295477	-0.135725	0.926706	1.31974	0.0873879		4.69999	4.85356	4.49464	3.62558	3.47758	3.63536	4.97472	4.50876	4.15204
PTBP1A	NA	0.622721	1	-0.89825	0.507468	-1.52097	0.0892116		3.55604	4.18864	3.6894	4.2959	4.38928	4.31592	3.1683	3.07302	3.51337
ENSNFUG00015007546	GBP	-2.13767	0.882622	0.409984	0.895685	2.54765	0.0892971		6.63994	2.23626	5.93343	3.62558	4.38928	3.74016	6.86136	6.30489	4.31455
ENSNFUG00015022671	IGF1	1.59645	0.00928853	2.45782	5.24263e-08	0.861372	0.0900295		4.28715	4.07137	3.77005	5.30218	5.37439	5.4371	6.07939	6.04034	6.36509
MBNL1	NA	1.01198	1	-0.549685	0.755069	-1.56166	0.0900295		3.55604	3.27709	3.91897	4.44149	4.26085	4.3822	2.95278	3.07302	3.64142
LRRC28	NA	-0.795413	1	0.89178	0.52312	1.68719	0.0900613		4.46669	3.16708	3.60397	3.35853	3.22565	3.2657	4.97472	4.43705	3.86776
SLC25A38A	NA	-0.0659415	1	1.7852	0.146282	1.85115	0.0901646		6.84866	4.4922	3.91897	5.33981	4.81224	6.24972	7.21632	7.78367	6.92653
ENSNFUG00015019731	Nfu_g_1_016071	-0.499384	1	0.528587	0.561365	1.02797	0.090416		6.58268	5.30697	5.6857	5.41226	5.54954	5.46795	6.62655	6.38329	6.28892
TM6SF2A	NA	-0.992298	0.541647	0.0104081	0.99303	1.00271	0.0909883		5.83388	5.86029	5.30756	4.69484	4.61621	5.04549	5.75218	5.96586	5.28449
PCK2	NA	1.14588	0.79494	-0.165954	0.92328	-1.31184	0.0909883		5.69668	7.01422	7.2012	7.65173	7.90982	8.0962	5.81746	6.08794	7.41277
ENSNFUG00015017532	RPLP2L	-1.00164	1	0.313165	0.839605	1.3148	0.0909883		11.3	9.18119	9.73815	9.48852	9.37005	9.22982	11.1841	10.4919	10.1577
CYP24A1	NA	1.67288	1	-0.555437	0.833554	-2.22831	0.0909883		10.3488	4.4922	8.07438	10.8393	10.0038	11.103	8.38081	8.68797	8.42272
ENSNFUG00015021445	UBA52	-0.683352	1	0.391269	0.727922	1.07462	0.0909883		10.5477	9.00653	9.34607	9.12075	9.16104	9.05292	10.542	10.1278	9.77173
ENSNFUG00015010210	YIPF2	-0.857514	1	0.468496	0.712923	1.32601	0.0909883		4.90076	4.18864	4.11698	3.85083	3.35711	4.01541	5.13695	4.70469	4.52842
ENSNFUG00015008479	ZMPSTE24	0.721121	1	-1.66896	0.390965	-2.39008	0.0909883		2.40426	4.00896	4.39644	4.50912	4.38928	4.31592	2	2.35158	3.64142
ENSNFUG00015008857	OLA.3887	0.349512	1	-1.02532	0.336571	-1.37483	0.0909883		3.84289	5.17107	5.04124	5.33981	5.13891	4.87184	3.67042	3.68153	4.46059
WARS1	NA	0.244709	1	-2.28923	0.198338	-2.53394	0.0909883		2	4.18864	4.44638	4.2172	4.19208	3.83786	2.39162	3.07302	2.3391
ENSNFUG00015024416	EYA4	0.153567	1	1.31714	0.068852	1.16357	0.0909883		5.58447	4.24388	4.58659	5.05307	4.56273	5.3404	6.23085	5.96586	6.03281
ENSNFUG00015018200	EBP	-1.06336	1	-2.66321	0.00145554	-1.59986	0.0909883		6.50261	8.28955	8.67331	7.51858	7.28271	5.81845	6.18211	4.82194	5.24472
ENSNFUG00015000023	ATP6	-1.92313	0.368065	-0.165107	0.944743	1.75802	0.0910961		12.5212	9.28854	9.62616	9.09071	9.46783	9.40542	11.4478	11.1138	10.5461
PPT1	NA	-0.158078	1	0.851299	0.239967	1.00938	0.0910961		5.98885	5.14229	5.25248	5.183	5.40509	5.4371	6.69762	6.17867	5.8593
ENSNFUG00015001408	SEL1L	0.351202	1	-2.10423	0.239379	-2.45543	0.0910989		2	4.4922	3.77005	4.2172	4.11987	3.74016	2.69931	2.63405	2.61347
ENSNFUG00015007666	Nfu_g_1_007654	-0.90348	0.704447	-1.89762	0.000159388	-0.994138	0.0911798		10.2139	8.9159	9.98726	8.56367	8.93508	9.1607	8.25685	7.59063	7.85056
ENSNFUG00015022571	KRTCAP2	-1.44402	0.192436	-0.245006	0.85833	1.19902	0.0913446		8.1922	6.83695	6.61767	6.07922	6.13007	5.76976	7.5207	7.14954	6.6503
TMEM218	NA	-0.741738	1	0.33496	0.771201	1.0767	0.0913446		6.41784	5.69173	5.25248	5.183	5.1019	5.23674	6.55178	6.11117	5.7212
MYSM1	NA	-1.31239	1	0.657399	0.74713	1.96979	0.0913446		5.69668	3.04797	3.6894	3.49822	3.47758	3.74016	5.61202	4.64229	4.97986
ENSNFUG00015021894	SRSF11	-1.15557	1	0.363482	0.834448	1.51905	0.0916649		6.46085	4.62297	4.63045	4.50912	4.5072	4.44556	6.3679	5.62227	5.28449
ENSNFUG00015017850	TOR1	0.212684	1	-1.39129	0.231113	-1.60397	0.0916649		3.38794	4.95636	4.44638	4.69484	4.61621	4.50626	2.95278	3.25084	3.86776
ENSNFUG00015024269	TFPI2	-0.760325	1	0.555555	0.65451	1.31588	0.0919107		4.96192	4.78072	4.86885	4.13395	4.32649	4.24646	5.87991	5.55611	4.15204
GPX8	NA	-1.14804	1	0.957471	0.566585	2.10551	0.092032		3.38794	3.27709	2.80053	2.60541	2.53227	2.76742	4.14748	3.80059	3.21712
ENSNFUG00015004808	ILVBL	0.127271	1	-1.45293	0.187222	-1.5802	0.0927187		3.55604	4.44584	4.34471	4.50912	4.26085	4.0966	2.69931	3.40912	3.37284
ENSNFUG00015012031	MED10	-0.611647	1	0.336491	0.733655	0.948138	0.0937422		6.58268	5.50085	5.89798	5.48124	5.62973	5.30666	6.27799	6.49344	6.30834
ENSNFUG00015002933	SLC27A1A	0.267676	1	-1.53116	0.247884	-1.79884	0.0938042		2.97836	4.66405	4.05395	3.9515	4.61621	4.24646	2.95278	3.25084	3.04255
PMPCA	NA	0.129304	1	-1.71347	0.180981	-1.84277	0.0940631		3.70658	4.00896	3.60397	3.74259	4.04385	3.83786	2.39162	3.07302	2.8439
ENSNFUG00015019477	C19H9ORF91	0.565071	1	1.85727	0.0168719	1.2922	0.0940631		2.97836	3.56429	3.84643	3.74259	4.32649	3.63536	5.28277	4.87717	4.77173
ENSNFUG00015004935	SLC25A6	-0.120199	1	0.452981	0.302794	0.57318	0.0945195		11.138	10.6249	10.7335	10.7495	10.7954	10.6366	11.3533	11.2567	11.2908
ENSNFUG00015006460	TMED2	0.0509583	1	-1.5428	0.152585	-1.59376	0.0948071		4.46669	7.26179	6.95608	6.8397	6.85239	6.35248	4.91632	5.80427	4.65519
NAA50	NA	0.241679	1	-1.05977	0.281591	-1.30145	0.094987		4.28715	5.75014	5.66476	5.51454	5.86881	5.40558	3.92858	4.3616	4.93057
ENSNFUG00015017630	PGGT1B	0.486884	1	-1.83936	0.311454	-2.32624	0.0959698		2.40426	3.94373	3.41626	3.74259	3.87862	3.63536	2.69931	2.63405	2.3391
ENSNFUG00015017631	LGR4	0.474625	1	-1.41514	0.352197	-1.88977	0.0961407		3.19764	3.80369	3.60397	3.74259	4.04385	3.92936	2.39162	2.63405	3.21712
ENSNFUG00015000983	OLA.5669 ENSNFUG00015000983	-2.66978	0.621946	0.0936607	0.979454	2.76344	0.0967824		2.71968	4.8176	2.80053	2.60541	2.53227	2.30343	4.3375	4.10819	2.8439
SERPIND1	NA	1.20362	0.798953	-0.155153	0.928521	-1.35877	0.0967824		8.10677	9.59108	9.7243	10.3224	10.5607	10.604	8.02087	8.66461	10.0172
PROM1B	NA	1.01965	1	-0.433374	0.800845	-1.45302	0.0967824		3.19764	4.00896	4.44638	4.85937	4.76568	4.87184	3.35577	3.25084	4.23558
ENSNFUG00015009311	ABCC6 ENSNFUG00015009311	0.505176	1	-1.92965	0.3095	-2.43483	0.0968697		3.38794	2.61712	4.63045	4.44149	4.44944	3.39972	2.39162	2.35158	3.21712
ENSNFUG00015004260	SYPL1	0.751817	1	-1.11903	0.518215	-1.87085	0.0974796		2.97836	3.72822	3.31237	3.74259	4.04385	3.92936	2.95278	2.63405	2.8439
NAMPT	NA	0.664276	1	-0.960452	0.517569	-1.62473	0.0976566		3.19764	5.02103	4.23533	4.91029	5.06391	4.77649	3.1683	3.25084	4.23558
SLC7A1	NA	-0.646671	1	1.1361	0.40031	1.78277	0.0976566		3.38794	2.77547	3.51316	3.03057	2.92022	2.76742	4.04218	3.68153	4.23558
SEPTIN2	NA	-0.266977	1	-2.07937	0.0650667	-1.81239	0.0976566		3.70658	4.34839	4.34471	4.13395	4.11987	3.63536	2.39162	2.63405	3.37284
ENSNFUG00015007120	CTSL	0.236952	1	1.12621	0.038055	0.889255	0.0976566		7.65769	7.18624	7.77548	7.37189	7.65265	8.21914	8.25096	8.57559	9.06337
ENSNFUG00015004521	SPCS3	-0.162308	1	0.456772	0.35244	0.619079	0.0976795		8.75121	8.19461	8.35491	8.26427	8.36904	8.22818	9.01668	8.77415	8.90333
PPP1R1B	NA	1.04512	0.344118	0.101495	0.939085	-0.943623	0.0979847		4.69999	4.8176	4.94029	5.75637	5.89068	5.64034	4.72543	4.57707	5.3232
POLR3E	NA	0.509988	1	-1.53366	0.353284	-2.04365	0.0979847		2.97836	3.94373	3.41626	3.74259	3.9636	3.92936	2.39162	2.35158	3.21712
ENSNFUG00015004528	B2M	0.930519	1	-0.431685	0.788629	-1.3622	0.0980084		3.70658	3.94373	4.05395	4.63555	4.66777	4.67439	3.67042	2.87017	4.06336
DCXR	NA	-0.619424	1	0.252247	0.797702	0.871672	0.0980627		7.72979	6.80975	6.99015	6.65797	6.58373	6.63665	7.72164	7.56563	7.04705
ENSNFUG00015004642	PWP1	0.19575	1	-1.75137	0.217264	-1.94712	0.0981232		2.97836	3.94373	3.84643	3.85083	3.87862	3.74016	2.69931	2.63405	2.8439
ALLC	NA	-0.0654527	1	0.846625	0.188824	0.912078	0.0981232		8.66188	7.45559	7.59353	7.94824	7.91517	7.95636	9.03052	8.86234	8.59869
ENSNFUG00015013971	UGT5D1	0.936094	0.946891	-0.23621	0.868089	-1.1723	0.0987243		5.54504	7.47303	6.86721	7.50208	7.9258	7.78933	6.15711	6.59578	6.96375
ENSNFUG00015010510	CYP2J2	0.46876	1	-0.403249	0.638843	-0.872009	0.0987243		7.24293	6.56059	6.82064	7.29733	7.4017	7.35023	6.05253	6.28461	7.00004
CDC42L	NA	0.723773	1	-1.12271	0.507482	-1.84648	0.0987243		2.97836	3.94373	3.31237	4.04561	3.9636	4.01541	2.39162	3.07302	3.04255
PDXKA	NA	-0.0880316	1	-2.10814	0.112559	-2.02011	0.0987243		2.97836	4.88864	4.05395	4.04561	4.44944	3.83786	2.39162	2.87017	3.21712
PTDSS1A	NA	0.523652	1	-1.69068	0.338303	-2.21433	0.0987971		2.40426	4.00896	4.17737	4.13395	4.19208	4.0966	2	2.63405	3.37284
ENSNFUG00015024988	HSD17B12B	0.151673	1	-1.1135	0.231216	-1.26517	0.0988633		4.77006	6.16221	6.05107	5.91439	6.09283	5.79431	4.58252	4.10819	5.39763
SESN1	NA	0.111614	1	1.38804	0.0957227	1.27643	0.0995111		4.96192	3.37931	4.63045	4.44149	4.32649	4.77649	5.99725	5.45082	5.43346
ENSNFUG00015014118	PXMP2	0.13989	1	0.81792	0.055622	0.67803	0.100421		8.52672	8.12643	7.70543	8.22458	8.30535	8.34079	8.95274	8.97739	8.95663
ENSNFUG00015011999	SOX4A	-0.611476	1	-3.84965	0.0572686	-3.23817	0.100826		3.96742	2.61712	4.49464	3.62558	3.47758	3.2657	2	2	2.61347
THOC2	NA	-1.47892	0.965844	0.36773	0.85433	1.84665	0.100929		4.90076	3.27709	3.51316	3.20385	3.08101	2.9533	4.58252	4.57707	3.64142
ENSNFUG00015007965	DPAGT1	-0.0199359	1	-1.13477	0.131425	-1.11484	0.100939		4.69999	5.75014	5.74676	5.41226	5.54954	5.46795	4.3375	4.1977	4.87954
ENSNFUG00015001902	SAP18	-0.749865	0.882622	0.126183	0.909572	0.876048	0.101811		5.73222	5.73093	5.48529	4.80658	5.24457	4.82495	5.93978	5.83249	5.50254
ENSNFUG00015017463	LDLR	1.30655	0.422107	0.0800231	0.968127	-1.22653	0.102428		3.70658	3.64858	4.29106	5.09769	5.0249	4.82495	4.42388	3.80059	3.64142
ENSNFUG00015009135	PSMB6	-0.830049	0.989454	0.218068	0.861136	1.04812	0.102428		8.32034	6.98209	7.06399	6.81319	6.73643	6.79099	8.17826	7.73964	7.37642
ENSNFUG00015023783	ERRFI1	-0.115254	1	1.14087	0.207449	1.25612	0.102428		5.18352	3.72822	4.97473	4.2959	4.44944	5.04549	6.05253	5.41394	5.7212
TOMM20	NA	-1.05118	0.996198	0.285312	0.845735	1.3365	0.103141		4.08205	4.66405	4.05395	3.62558	3.58877	3.39972	4.50538	4.87717	4.15204
ENSNFUG00015011190	GOT1	1.41331	0.47004	2.72126	5.97864e-05	1.30795	0.103319		7.19279	6.83695	4.67302	7.95432	7.56698	8.23268	9.21747	9.26568	9.22796
ENSNFUG00015023944	AGPAT3	0.365814	1	-1.58249	0.304606	-1.9483	0.103319		2.97836	4.07137	4.29106	4.13395	4.26085	4.17348	2.39162	2.35158	3.64142
ENSNFUG00015010557	COMMD3	-0.110148	1	0.789592	0.233524	0.89974	0.103909		5.73222	5.2808	5.10482	5.26353	5.49348	5.04549	6.10577	6.38329	5.77803
ENSNFUG00015013283	AZIN1A	-0.710639	1	0.829194	0.526154	1.53983	0.104051		4.08205	3.27709	3.51316	3.20385	2.92022	3.39972	4.50538	4.01277	4.15204
UGL	NA	-0.476341	1	0.59636	0.551759	1.0727	0.104064		9.12996	7.71704	7.66382	7.77362	7.82152	7.99922	9.20532	9.01789	8.46228
ENSNFUG00015011402	DNAJA3B	0.0181425	1	-1.88681	0.151856	-1.90495	0.104141		3.19764	4.1312	4.11698	3.9515	3.87862	3.92936	2	3.07302	3.04255
ENSNFUG00015001175	AGXT2	1.504	0.0606837	0.456696	0.679052	-1.04731	0.104271		4.83689	6.19061	5.66476	7.20858	7.04018	7.08764	5.71839	5.77549	6.63499
ARHGEF25	NA	1.43147	0.926598	-0.440824	0.853854	-1.8723	0.10434		3.55604	2.43922	3.41626	4.13395	4.04385	4.24646	2.69931	2.63405	3.37284
LXN	NA	-0.309782	1	0.641573	0.419005	0.951355	0.10434		5.62285	5.30697	5.00837	5.09769	4.81224	5.20046	6.301	5.52186	5.80563
ENSNFUG00015007842	TGFBR3	-0.898926	1	0.826314	0.602675	1.72524	0.104577		5.02059	2.91815	3.84643	3.20385	3.35711	3.83786	5.08488	4.87717	4.38941
ENSNFUG00015022695	TMEM248	1.02692	1	-1.44471	0.54397	-2.47163	0.104577		2.40426	3.37931	3.41626	3.9515	3.78832	3.74016	2	2	3.21712
CCDC134	NA	-0.340679	1	-2.38841	0.0660924	-2.04773	0.104577		2.97836	4.85356	4.39644	4.13395	4.26085	3.63536	2.39162	3.25084	2.61347
RPL39	NA	-1.11165	0.950711	0.255923	0.882382	1.36758	0.105144		11.7509	9.32742	9.98936	9.64139	9.80082	9.40342	11.4777	10.859	10.4324
NDUFA2	NA	-0.929268	1	0.341801	0.822294	1.27107	0.105144		8.90707	6.97394	7.14182	7.00109	7.27442	6.82713	8.67746	8.25431	7.81705
LSS	NA	-1.23167	1	-3.07221	0.002102	-1.84054	0.105144		5.73222	6.42377	7.53704	6.16559	5.77788	4.24646	4.79191	2.63405	3.96887
ENSNFUG00015017097	DPH3	-1.15573	0.667932	0.0455934	0.979454	1.20133	0.105247		6.39584	5.35794	4.86885	4.69484	4.81224	4.3822	5.81746	5.88733	5.3609
NUPR1A	NA	-0.925248	1	0.319207	0.832657	1.24446	0.106406		7.01662	5.1993	6.01843	4.91029	5.46462	5.69351	6.05253	6.82375	6.68043
PHF5A	NA	-1.15508	0.223633	-0.202824	0.85433	0.952252	0.107363		6.4395	6.16221	5.64351	5.05307	5.2102	4.87184	6.301	5.58957	5.77803
CWC27	NA	-1.13107	1	0.584796	0.727922	1.71587	0.107363		4.28715	3.27709	3.20041	2.83359	2.92022	3.11794	4.14748	4.10819	3.86776
ENSNFUG00015019118	C22H19ORF60	-0.582928	1	0.647478	0.560046	1.23041	0.107363		5.07697	4.1312	4.17737	3.9515	3.9636	4.17348	4.91632	5.45082	4.65519
MAP1LC3B	NA	-0.448113	1	0.932325	0.421123	1.38044	0.107363		5.18352	3.87541	5.00837	4.2172	3.87862	4.91725	4.85546	5.58957	6.10122
ARFGAP2	NA	0.370063	1	-1.22241	0.34994	-1.59247	0.107363		3.19764	5.02103	4.05395	4.50912	4.9011	4.3822	3.52165	3.40912	3.37284
ENSNFUG00015014206	EIF3D	-0.122413	1	0.490196	0.310651	0.612608	0.107363		6.86476	6.68556	6.81114	6.71636	6.58373	6.70298	7.44008	7.1718	7.15828
ENSNFUG00015023111	PRP19	-0.144172	1	-1.82902	0.101903	-1.68485	0.107363		3.19764	5.11292	4.54135	4.2959	4.66777	4.17348	3.35577	3.25084	3.04255
ENSNFUG00015000783	EDF1	-0.0284662	1	0.645769	0.180272	0.674235	0.107561		6.39584	6.23218	6.45643	6.58148	6.14834	6.24972	6.86136	6.98329	7.09257
ENSNFUG00015015334	C19H6ORF62	-0.598149	1	0.72893	0.543624	1.32708	0.107919		4.90076	3.47476	4.23533	3.74259	3.78832	3.92936	5.13695	4.7645	4.71464
ENSNFUG00015008736	COQ7	-0.590464	1	0.89381	0.471265	1.48427	0.107985		4.08205	3.47476	3.60397	3.49822	3.08101	3.39972	4.24562	4.87717	3.86776
MALSU1	NA	0.853438	1	-0.506464	0.749876	-1.3599	0.108987		3.96742	4.18864	3.84643	4.7518	4.85736	4.44556	2.95278	3.40912	4.23558
ENSNFUG00015023584	DAPL1	-0.50454	1	0.656739	0.546245	1.16128	0.108987		7.52211	5.58882	6.17473	6.14447	6.14834	6.21377	7.33253	7.09234	7.41277
PSMD5	NA	0.0168182	1	-2.16293	0.157113	-2.17975	0.109062		2.71968	3.87541	3.91897	3.62558	3.69199	3.63536	2.69931	2.35158	2.61347
COL1A1B	NA	-1.72786	1	-4.28776	0.002102	-2.55991	0.109427		4.08205	3.27709	7.11891	4.7518	4.04385	3.92936	2.69931	2.63405	2.8439
ENSNFUG00015016159	GK5	0.523535	1	-0.443812	0.661697	-0.967347	0.109864		5.13123	5.45477	5.16571	5.64052	5.68082	5.88853	4.3375	4.70469	5.3609
AQP7	NA	0.914977	0.179813	1.60076	9.3126e-06	0.68578	0.110113		5.54504	5.89522	5.76655	6.59711	6.48658	6.75393	7.4192	7.40579	6.97595
ENSNFUG00015013998	NT5C2L1	1.26363	0.942027	-0.383451	0.85707	-1.64708	0.110113		3.70658	2.91815	3.31237	3.85083	4.04385	4.56451	3.1683	3.25084	2.8439
ENSNFUG00015021987	MINPP1A	1.02064	1	-0.455923	0.800884	-1.47656	0.110113		3.38794	3.94373	3.98804	4.44149	4.66777	4.72634	2.39162	3.68153	3.96887
ENSNFUG00015021741	MAPK6	1.40102	0.621946	-0.0530371	0.983266	-1.45405	0.110368		3.84289	3.56429	2.94649	4.7518	4.11987	4.56451	3.35577	3.68153	3.21712
ZGC:101559	NA	-0.0305983	1	1.49323	0.166426	1.52383	0.110735		4.28715	2.61712	3.98804	3.85083	3.22565	4.01541	4.79191	5.12546	4.87954
AMDHD2	NA	0.758547	0.90193	1.58711	0.000696755	0.82856	0.111178		5.07697	4.704	4.39644	5.30218	5.52178	5.3404	6.32365	6.17867	5.96098
POLD4	NA	-1.4884	0.90193	0.25053	0.911214	1.73893	0.111238		6.4395	3.56429	4.34471	4.2172	4.04385	3.83786	5.53648	5.55611	5.43346
ENSNFUG00015015554	MAPK13	-0.868558	1	0.66635	0.65451	1.53491	0.111574		4.77006	3.16708	4.11698	3.49822	3.08101	3.83786	4.79191	4.82194	4.31455
ENSNFUG00015013225	ITGB1	0.962109	0.99278	-0.283172	0.857094	-1.24528	0.111993		3.70658	4.00896	4.67302	5.00703	4.9011	5.12505	3.35577	4.3616	4.06336
ENSNFUG00015004249	DCN	1.29651	0.987955	-0.422093	0.848955	-1.7186	0.112858		2.97836	3.04797	3.77005	4.80658	3.69199	4.01541	3.1683	3.07302	3.04255
USP14	NA	0.190807	1	-1.75776	0.238699	-1.94857	0.113005		2.71968	4.53712	3.91897	4.04561	4.32649	3.83786	2.39162	3.25084	2.8439
C3B.2	NA	1.21736	0.143091	0.301312	0.778475	-0.916045	0.113118		7.47043	6.13325	7.26521	8.41733	8.00311	8.29851	7.53046	7.11549	7.37642
ENSNFUG00015009557	APOF	0.521205	1	-0.848173	0.502734	-1.36938	0.113118		4.37971	6.1478	6.61767	6.43268	6.54289	6.49407	4.58252	4.93036	5.83272
ENSNFUG00015006005	PIK3R1	-2.17877	0.203301	-0.440654	0.826724	1.73812	0.113582		4.69999	6.44749	4.17737	3.62558	3.9636	3.39972	5.75218	4.64229	4.46059
ENSNFUG00015005523	MED31	-0.965837	1	0.322628	0.824723	1.28847	0.114072		4.37971	4.34839	3.98804	3.62558	3.58877	3.39972	4.72543	4.70469	3.96887
ENSNFUG00015023147	PPP1R3C	0.531689	1	-0.855016	0.507768	-1.3867	0.115543		6.10186	5.99519	6.89445	6.81319	6.13007	7.4617	4.42388	5.12546	6.45498
ENSNFUG00015011758	NUB1	-0.452781	1	0.79903	0.462084	1.25181	0.115543		4.96192	3.87541	4.11698	3.9515	4.04385	4.01541	5.4152	5.07911	4.46059
LMAN1	NA	0.334508	1	-1.29495	0.332211	-1.62946	0.115543		3.70658	5.96263	6.03485	5.83754	6.0546	5.71938	3.92858	3.55175	5.24472
ENSNFUG00015011009	GPR146	0.32731	1	1.65312	0.0600358	1.32581	0.115543		4.62633	3.47476	3.51316	4.2959	4.04385	4.17348	5.57475	5.58957	4.46059
AGPAT9L	NA	-0.00987489	1	-1.18638	0.156821	-1.1765	0.116039		4.54872	6.07351	6.083	5.78394	5.91221	5.46795	4.58252	4.43705	4.97986
PRDX6	NA	0.172171	1	0.843019	0.0548688	0.670848	0.116311		6.50261	6.07351	6.03485	6.43268	6.21918	6.4484	6.93675	6.97065	7.1258
ENSNFUG00015011703	SYNJ2BP	0.405088	1	-1.36068	0.362792	-1.76577	0.116431		2.97836	4.8176	3.60397	4.37053	4.44944	4.24646	2.69931	3.40912	3.21712
ENSNFUG00015007377	SMOX	0.639456	1	2.25531	0.0306882	1.61586	0.118258		4.08205	3.16708	3.6894	4.57372	3.58877	4.0966	6.13166	5.74612	3.75902
PCSK5B	NA	0.0948407	1	-1.21758	0.224332	-1.31242	0.118986		4.90076	4.53712	4.97473	4.85937	4.81224	5.00399	3.1683	3.25084	4.5932
ENSNFUG00015014088	FAM96A	0.0283274	1	0.914017	0.14539	0.88569	0.118986		4.83689	4.4922	4.71437	4.80658	4.56273	4.72634	5.32828	5.62227	5.46841
RPS15A	NA	-0.675355	1	0.36576	0.762426	1.04112	0.119009		10.443	8.81691	9.20088	8.97887	9.14294	8.83065	10.4081	9.9167	9.64569
PDHA1A	NA	-0.0425867	1	-1.23969	0.145202	-1.1971	0.120237		4.18824	5.05232	4.83175	4.44149	4.85736	4.82495	3.67042	3.68153	3.96887
ENSNFUG00015006235	SDF2	-0.497122	1	-2.13891	0.0407935	-1.64179	0.120237		3.55604	6.2046	5.78608	5.14098	5.31094	4.87184	3.80526	4.1977	3.21712
ENSNFUG00015012729	TMEM168A	0.443359	1	-1.44631	0.371939	-1.88967	0.120804		2.71968	4.00896	3.6894	4.13395	4.11987	3.39972	2.69931	2.87017	2.8439
ENSNFUG00015004816	PTGES3A	-0.347238	1	-2.24035	0.0762769	-1.89312	0.120804		3.38794	6.53867	4.86885	5.183	5.54954	4.62049	3.1683	4.1977	3.37284
ENSNFUG00015023532	SFTPB	1.04151	1	-0.344772	0.844198	-1.38628	0.121076		3.38794	5.33268	5.72669	6.01087	6.0351	6.21377	4.42388	4.50876	5.3609
TMA7	NA	-1.19929	0.527946	-0.0821931	0.961127	1.1171	0.121078		7.03096	5.67173	5.70634	5.22383	5.1019	5.16325	6.45253	6.3249	5.69192
DRAP1	NA	0.224032	1	-1.5072	0.27784	-1.73123	0.121942		2.97836	4.24388	3.98804	4.04561	4.04385	4.01541	2.39162	3.25084	3.04255
URM1	NA	-1.11535	0.903374	0.172714	0.917064	1.28806	0.122188		5.41985	4.34839	4.23533	3.85083	3.9636	3.74016	5.18722	4.98167	4.38941
ENSNFUG00015009615	BLVRA	-0.122571	1	0.845387	0.255597	0.967958	0.122188		4.46669	4.34839	4.29106	4.13395	4.26085	4.3822	5.03085	5.12546	5.07365
ERLIN1	NA	1.24011	1	-0.739548	0.755069	-1.97966	0.12229		2.71968	4.29708	4.63045	5.05307	5.1019	5.27213	2	3.25084	4.46059
ENSNFUG00015008849	DDX3	1.17861	0.773599	-0.0887979	0.966854	-1.2674	0.122328		3.19764	4.85356	3.98804	5.33981	5.175	5.08582	4.3375	3.91058	4.15204
ENSNFUG00015005881	RCN3	-0.0377589	1	-1.10434	0.149624	-1.06658	0.122549		5.92884	7.48454	6.91233	7.0359	6.90705	6.67681	5.49718	5.58957	6.34642
URAD	NA	-0.815568	0.902451	0.120831	0.92499	0.936399	0.122974		7.44923	6.48236	6.38139	6.16559	6.07384	5.95536	7.14181	7.1828	6.45498
RPL28	NA	-0.530185	1	0.416537	0.68209	0.946722	0.123477		10.7379	9.23501	9.64232	9.51959	9.51259	9.43108	10.7486	10.2778	10.2051
CLPTM1	NA	0.263136	1	-1.12499	0.332211	-1.38813	0.123477		3.70658	5.86029	5.22413	5.41226	5.57677	5.30666	3.92858	4.70469	3.96887
ENSNFUG00015006829	TMEM97	0.00713374	1	-0.930242	0.180272	-0.937376	0.123477		5.41985	6.21845	6.52775	6.12305	6.31931	5.97697	5.18722	5.03121	5.56847
SLC38A4	NA	0.64989	1	-0.38928	0.755069	-1.03917	0.123672		4.77006	5.50085	4.75457	5.37649	5.40509	6.06029	4.42388	4.98167	4.71464
ENSNFUG00015017865	NFKBIAA	0.78449	1	2.16493	0.0123693	1.38044	0.123828		4.18824	4.07137	4.11698	5.09769	4.56273	4.56451	6.58965	6.28461	4.23558
ZGC:153031	NA	2.60037	0.0281022	3.75692	5.09456e-06	1.15655	0.123842		3.19764	2.61712	2.24542	4.13395	4.19208	4.24646	5.23579	5.41394	4.77173
ENSNFUG00015013165	PAIP2B	0.575728	1	-0.852374	0.54397	-1.4281	0.123842		3.70658	4.704	5.30756	5.30218	5.13891	5.27213	3.35577	3.55175	4.77173
ENSNFUG00015001277	MOSPD1	-0.315842	1	0.824117	0.391886	1.13996	0.123842		4.77006	3.72822	4.34471	3.9515	3.87862	4.31592	5.13695	4.82194	5.02752
ENSNFUG00015004604	RAB25	-2.00993	0.810185	0.141729	0.962175	2.15166	0.123909		4.83689	2.91815	3.07903	3.03057	2.73925	2.30343	4.14748	3.91058	3.75902
ENSNFUG00015001764	QDPRA	0.0533412	1	0.519879	0.108926	0.466538	0.123952		8.97169	8.90951	9.09332	8.97589	9.07295	9.0881	9.56266	9.3943	9.56724
NDUFB7	NA	-0.87428	0.88042	0.083236	0.95477	0.957516	0.12428		8.36064	7.17207	7.03164	6.68746	6.86349	6.82713	8.04151	7.5572	7.52495
ENSNFUG00015003132	SKIV2L2	0.417331	1	-1.42942	0.371716	-1.84675	0.12453		2.97836	3.56429	3.6894	3.62558	3.9636	3.63536	2.69931	2.63405	2.8439
ENSNFUG00015006258	PRMT3 ENSNFUG00015006258	-0.276037	1	0.973149	0.338303	1.24919	0.12453		4.46669	3.94373	3.77005	3.9515	3.87862	3.74016	5.32828	4.87717	4.15204
ENSNFUG00015022687	CCDC50	-1.13875	1	0.765985	0.690602	1.90473	0.125015		4.54872	3.04797	3.20041	3.20385	2.73925	3.11794	5.03085	3.91058	3.51337
GPKOW	NA	-0.957396	1	0.788884	0.630153	1.74628	0.126388		4.08205	3.04797	3.07903	3.03057	2.92022	2.76742	4.04218	4.28197	3.51337
IDH1	NA	0.102858	1	-0.547628	0.309253	-0.650487	0.126388		8.2175	8.45377	8.71973	8.49861	8.6543	8.58898	7.73014	7.73217	8.28244
CYP2P6	NA	0.586633	1	-0.229722	0.824723	-0.816356	0.126625		7.12755	7.54627	7.23711	7.64423	7.91517	8.08131	6.43183	7.06881	7.55778
ENSNFUG00015018823	RTN1	0.061643	1	-1.75261	0.207187	-1.81425	0.126826		4.46669	3.56429	3.77005	4.63555	3.35711	3.74016	3.1683	2.87017	2.61347
ENSNFUG00015005795	C5H9ORF78	0.0953958	1	1.18059	0.126743	1.08519	0.127165		4.18824	3.64858	3.91897	4.04561	3.78832	4.0966	5.03085	4.7645	4.77173
ENSNFUG00015006013	EIF6	-0.70358	0.665617	-0.00652013	0.99306	0.69706	0.127476		6.39584	6.66547	6.82064	5.93912	6.09283	5.88853	6.49306	6.89238	6.48943
ENSNFUG00015001511	C1H19ORF53	-0.653151	1	0.335664	0.770099	0.988815	0.127476		6.1552	5.22698	5.28028	5.05307	5.1019	4.87184	6.20668	6.01594	5.39763
ENSNFUG00015004865	LRRC59	-0.394732	1	-2.28894	0.0734829	-1.8942	0.127509		3.55604	6.24577	4.11698	4.63555	5.34301	4.17348	3.35577	3.55175	3.21712
ENSNFUG00015012505	C3H7ORF55	-0.554747	0.90193	0.0770274	0.928066	0.631774	0.127768		6.89644	6.86365	6.59571	6.14447	6.39775	6.21377	6.87675	6.73683	6.96375
ENSNFUG00015008633	MINPP1B	1.02311	1	-0.634004	0.755069	-1.65711	0.127768		2.40426	3.80369	3.98804	4.2172	4.26085	4.56451	2.95278	2.87017	3.64142
TM9SF5	NA	0.555248	1	-1.11814	0.473465	-1.67338	0.127768		2.97836	5.14229	5.4612	5.41226	5.43516	5.27213	3.1683	3.55175	4.71464
ENSNFUG00015011340	ZFYVE21	0.223816	1	-1.19895	0.310651	-1.42277	0.127768		4.37971	5.91237	6.20406	5.86362	5.99529	5.86554	3.80526	4.01277	5.46841
ENSNFUG00015012572	CDC5L ENSNFUG00015012572	-0.458105	1	0.901499	0.442829	1.3596	0.128154		4.28715	3.47476	3.51316	3.49822	3.47758	3.39972	4.79191	4.50876	3.96887
ENSNFUG00015012937	PGRMC1	0.961725	0.889201	-0.103929	0.949372	-1.06565	0.129293		5.95916	7.25508	7.41067	7.82096	7.99304	8.03056	6.23085	6.67584	7.51662
ENSNFUG00015007616	PC	-1.21336	1	0.2476	0.89657	1.46096	0.129293		5.5045	4.00896	3.84643	3.62558	3.69199	3.74016	5.13695	4.93036	4.31455
ENSNFUG00015020642	RPL14	-0.883801	1	0.278965	0.849009	1.16277	0.129293		8.7727	6.82794	7.2012	6.98929	7.08828	6.8968	8.53917	7.97936	7.76177
ENSNFUG00015003921	POLR2GL	-0.785336	1	0.349228	0.788629	1.13456	0.129293		4.46669	4.85356	4.29106	3.85083	4.19208	3.74016	4.91632	5.17038	4.38941
STX4	NA	0.20459	1	-1.50754	0.281808	-1.71213	0.129293		2.97836	4.1312	3.84643	3.85083	4.04385	3.83786	2.69931	3.07302	2.8439
NCLN	NA	0.198172	1	-1.88536	0.259686	-2.08353	0.129293		2.40426	3.80369	4.05395	3.85083	3.87862	3.52235	2.39162	2.87017	2.61347
PLLP	NA	-0.0423333	1	-1.45425	0.15991	-1.41192	0.129293		3.55604	4.78072	4.58659	4.2959	4.71755	4.0966	3.35577	3.40912	3.37284
RHAG	NA	0.899419	1	-1.51025	0.529716	-2.40967	0.129959		2	3.37931	3.6894	4.2172	3.35711	3.74016	2.69931	2	2.8439
ENSNFUG00015008007	LECT2	1.5924	0.315837	2.88368	3.86784e-05	1.29128	0.130398		12.3169	10.8033	11.3893	13.8092	12.4655	13.1073	15.1922	14.5305	13.2065
ZGC:162608	NA	1.60545	0.559976	3.05175	0.000184465	1.4463	0.131121		5.73222	5.63087	3.51316	5.86362	6.52902	7.40704	7.40865	8.68797	8.07695
ENSNFUG00015017341	UQCRB	-0.740329	0.889201	0.0741448	0.95316	0.814474	0.131314		8.94921	7.99575	8.07438	7.72467	7.82152	7.45402	8.81568	8.27502	8.27258
SMG1	NA	-1.21892	1	0.452822	0.807724	1.67174	0.132067		4.28715	3.37931	3.31237	3.03057	2.92022	2.9533	4.14748	4.3616	3.37284
GET1	NA	-0.707652	1	0.44187	0.715314	1.14952	0.132067		4.28715	4.34839	3.98804	3.74259	3.78832	3.52235	4.79191	4.50876	4.38941
COX15	NA	0.475542	1	-0.869643	0.509134	-1.34518	0.13214		3.55604	4.29708	4.05395	4.2959	4.44944	4.44556	3.1683	3.07302	3.86776
DDX5	NA	-0.356463	1	0.672177	0.48594	1.02864	0.13214		8.05858	7.73643	6.61767	7.22878	6.85239	7.55085	8.69059	8.24384	7.61349
PRDX2	NA	0.0310639	1	0.602722	0.152041	0.571658	0.13214		10.0458	9.57905	9.41353	9.70766	9.65513	9.83321	10.3486	10.2675	10.2931
ENSNFUG00015002090	YIF1B	-0.350834	1	-2.99604	0.105153	-2.6452	0.132866		2.40426	4.24388	3.77005	3.62558	3.58877	3.11794	2	2.63405	2.3391
KIF21A	NA	-1.28461	1	0.343616	0.868089	1.62823	0.133409		6.20665	4.1312	3.91897	3.9515	4.19208	4.01541	6.02516	5.29729	4.65519
ENSNFUG00015007549	SLC3A2	-1.12566	1	0.722968	0.73432	1.84863	0.133409		6.86476	4.58069	6.0987	4.57372	5.57677	4.91725	7.88282	6.34463	4.23558
C8G	NA	-0.248438	1	0.587109	0.442084	0.835547	0.133409		9.93766	8.97627	8.85991	8.99075	9.13838	9.14885	10.2822	9.84924	9.55102
ENSNFUG00015004542	FEN1	0.0322647	1	-1.81877	0.206181	-1.85104	0.133409		2.97836	4.62297	4.44638	4.13395	4.71755	3.63536	2.39162	3.55175	2.8439
ENSNFUG00015000920	UGCG	-0.442591	1	-2.80015	0.0834073	-2.35756	0.133409		2.71968	4.39794	3.84643	3.49822	3.58877	3.52235	2	2.35158	2.8439
SNX9B	NA	-0.685117	1	0.311391	0.788629	0.996508	0.133737		5.23399	4.44584	4.71437	4.2172	4.19208	4.31592	5.03085	5.21394	4.97986
TMED10	NA	0.213492	1	-1.02781	0.332211	-1.2413	0.133737		5.18352	7.43793	7.33315	7.28774	7.20631	6.98475	5.4152	6.01594	6.34642
ENSNFUG00015019305	TOMM22	-0.184358	1	-1.70256	0.116691	-1.5182	0.134253		3.55604	6.23218	5.33433	5.33981	5.46462	4.91725	3.67042	4.1977	4.06336
PPP3R1A	NA	0.781997	1	-1.27083	0.545033	-2.05283	0.13461		2.71968	3.64858	3.07903	3.9515	3.69199	3.52235	2	3.07302	2.61347
BOLA1	NA	-0.401371	1	0.572055	0.541266	0.973426	0.13461		4.83689	4.24388	4.75457	4.2959	4.26085	4.31592	5.08488	5.29729	4.93057
PRKAB1B	NA	-0.22662	1	0.462049	0.467051	0.688669	0.13461		6.39584	5.89522	5.87992	5.81099	5.82406	5.91115	6.55178	6.47566	6.47231
ENSNFUG00015006998	RHOA	0.315651	1	-0.759995	0.444971	-1.07565	0.13461		4.37971	5.47799	5.55523	5.67036	5.49348	5.4371	4.14748	4.43705	5.02752
CLIC5B	NA	0.349335	1	-0.747313	0.47321	-1.09665	0.134915		4.28715	5.1993	4.49464	4.95947	5.06391	5.08582	3.92858	3.91058	4.46059
ENSNFUG00015000801	ATP5B	0.466399	1	-0.112374	0.888278	-0.578773	0.135428		9.04771	9.13445	8.98978	9.35933	9.4877	9.69826	8.69494	8.8242	9.25824
ENSNFUG00015005364	RWDD1	-0.53129	1	0.274372	0.771201	0.805663	0.135688		5.32991	5.52335	5.48529	4.91029	5.1019	4.91725	5.87991	5.83249	5.3609
ENSNFUG00015010808	LGALS2	-0.944115	0.942027	0.139927	0.92438	1.08404	0.136042		5.28274	4.8176	4.54135	4.13395	3.9636	4.24646	5.18722	4.43705	5.28449
ENSNFUG00015008098	COX17	-0.872919	1	0.269691	0.845735	1.14261	0.136042		4.69999	4.66405	4.44638	3.85083	4.11987	3.74016	5.32828	4.1977	4.77173
EHHADH	NA	0.983768	1	-0.36837	0.839605	-1.35214	0.136042		2.97836	4.8176	4.44638	4.95947	5.24457	5.20046	3.35577	4.1977	4.31455
TRA2B	NA	-0.657969	1	0.37485	0.751566	1.03282	0.136042		4.54872	4.98906	4.49464	4.13395	4.04385	4.31592	5.4152	4.82194	4.77173
NSFB	NA	0.592204	1	-1.10296	0.516288	-1.69516	0.136042		3.19764	3.56429	3.60397	4.04561	3.78832	3.83786	2.39162	2.63405	3.37284
ENSNFUG00015024352	NLE1	0.181327	1	-1.6439	0.277023	-1.82523	0.136042		2.97836	4.18864	3.6894	4.04561	3.58877	3.92936	2.39162	2.63405	3.21712
ENSNFUG00015020163	IKBKE	0.349719	1	1.77119	0.0801189	1.42147	0.136042		3.38794	3.04797	3.51316	3.74259	3.58877	3.2657	5.23579	4.50876	3.75902
CHPT1	NA	-0.225319	1	-1.27836	0.0795385	-1.05304	0.136042		4.77006	5.99519	5.93343	5.44716	5.6555	5.30666	4.50538	4.28197	4.82664
ENSNFUG00015006339	CPSF3L	0.0811247	1	-1.79433	0.230879	-1.87546	0.136157		3.38794	3.80369	3.41626	3.62558	3.69199	3.52235	2.39162	2.63405	2.8439
ENSNFUG00015016647	CU468924.1	0.464454	1	-1.4689	0.409155	-1.93335	0.136177		3.70658	3.04797	3.31237	3.62558	3.69199	3.63536	2.39162	2.35158	3.04255
ENSNFUG00015021316	TEX2	0.536916	1	-1.11488	0.48594	-1.65179	0.136579		2.97836	3.94373	3.60397	3.9515	3.9636	4.01541	2.69931	2.63405	3.37284
ENSNFUG00015017234	EMC3	0.16719	1	-1.01875	0.31245	-1.18594	0.136809		4.08205	4.98906	4.67302	4.69484	4.94356	4.72634	3.1683	4.10819	4.06336
ENSNFUG00015016420	HNRNPK	0.158815	1	-1.14648	0.299363	-1.3053	0.136809		3.70658	5.33268	4.86885	4.85937	5.2102	4.72634	3.52165	4.28197	3.75902
ENSNFUG00015021359	VDAC2	-0.0901613	1	-1.41448	0.152041	-1.32432	0.138226		4.18824	6.7346	6.48059	6.14447	6.20179	5.88853	4.72543	4.82194	5.07365
ENSNFUG00015013190	SREBF1	0.744809	1	-1.36208	0.522563	-2.10689	0.138907		2.97836	3.87541	2.63813	3.9515	3.69199	3.63536	2	2.87017	2.8439
ENSNFUG00015000529	ATP6V1G1	-0.777048	0.496362	-0.0889673	0.925755	0.688081	0.139154		7.11414	6.58219	6.68161	6.22713	6.07384	5.86554	6.8458	6.75169	6.5396
OS9	NA	0.867147	1	-0.453417	0.786704	-1.32056	0.139154		3.55604	4.95636	5.22413	5.54708	5.37439	5.66717	3.52165	4.1977	5.02752
ENSNFUG00015005100	TMEM110L	0.814479	1	-0.637815	0.710616	-1.45229	0.139154		3.55604	3.64858	3.91897	4.37053	4.19208	4.44556	2.69931	2.87017	3.96887
HSP90AB1	NA	0.207099	1	0.764245	0.0407935	0.557146	0.139237		10.1097	9.61616	9.81025	10.1411	10.0579	9.99152	10.7663	10.7092	10.3516
GNSB	NA	0.575157	1	-0.581655	0.643751	-1.15681	0.139561		4.90076	5.80626	6.38139	6.24707	6.47215	6.38517	4.3375	5.21394	5.91104
ENSNFUG00015016897	CHURC1	-0.765533	0.99278	0.133539	0.913334	0.899072	0.139698		5.62285	5.05232	5.07338	4.7518	4.44944	4.56451	5.45677	5.52186	5.11836
ENSNFUG00015005801	NAA10	-0.621902	1	0.318178	0.774625	0.94008	0.13989		5.66024	4.8176	4.94029	4.63555	4.56273	4.67439	5.4152	5.68552	5.20382
ENSNFUG00015020681	RAB7	0.731256	1	-0.576554	0.705115	-1.30781	0.13989		3.55604	4.58069	4.71437	5.05307	4.9848	5.00399	2.95278	3.91058	4.52842
RNF5	NA	-0.00321167	1	0.901349	0.206181	0.904561	0.13989		5.86623	5.11292	5.64351	5.33981	5.24457	5.97697	6.20668	6.11117	6.79501
CCNI	NA	0.267218	1	0.981256	0.0438104	0.714038	0.13989		5.23399	5.14229	5.25248	5.33981	5.31094	5.66717	6.02516	6.11117	6.18767
CGNB	NA	-1.3422	1	0.409262	0.845994	1.75146	0.140978		5.07697	3.04797	3.41626	3.35853	3.08101	3.11794	4.72543	4.50876	3.86776
ENSNFUG00015022624	TMEM30AA	-0.422233	1	0.626769	0.53688	1.049	0.141106		4.54872	4.00896	4.29106	4.13395	3.69199	4.01541	4.85546	4.70469	4.82664
TBCB	NA	0.347953	1	-1.39944	0.371073	-1.7474	0.141106		2.71968	4.74287	3.6894	4.50912	4.19208	4.01541	2.69931	3.25084	3.21712
LMAN2	NA	0.406943	1	-0.980676	0.456294	-1.38762	0.141655		3.55604	5.38276	5.48529	5.51454	5.49348	5.23674	3.80526	3.68153	4.87954
ENSNFUG00015010305	Nfu_g_1_021936	-0.631369	1	0.490564	0.684269	1.12193	0.141999		4.69999	4.53712	4.34471	3.62558	4.26085	4.0966	5.23579	5.17038	4.23558
ENSNFUG00015013182	MBNL2	-0.908452	1	0.718947	0.664474	1.6274	0.141999		3.96742	3.37931	3.31237	3.03057	3.08101	2.9533	4.65575	4.01277	3.21712
CBR1	NA	-0.10609	1	0.621414	0.321706	0.727503	0.141999		8.33775	7.44384	7.40436	7.73176	7.61374	7.70769	8.53917	8.31057	8.34491
ENSNFUG00015025406	FTSJ	0.00769354	1	-2.00719	0.209024	-2.01488	0.141999		2.71968	4.9229	3.41626	3.85083	4.38928	3.74016	2.95278	2.87017	2.61347
ENSNFUG00015023743	Nfu_g_1_015541	0.229775	1	0.828703	0.0415614	0.598928	0.141999		6.41784	6.17648	6.03485	6.43268	6.36688	6.47901	6.90706	7.10396	6.98805
ENSNFUG00015021118	Nfu_g_1_017267	-0.573277	1	0.379746	0.724182	0.953022	0.142505		5.13123	4.74287	4.86885	4.57372	4.38928	4.31592	5.64836	4.82194	5.16172
ENSNFUG00015009127	ACADM	0.400264	1	-0.85352	0.481109	-1.25378	0.142505		4.77006	6.42377	6.46856	6.48401	6.54289	6.35248	4.42388	4.93036	6.03281
ENSNFUG00015010782	CAPNS1A	0.279272	1	-0.835461	0.42036	-1.11473	0.142505		4.28715	4.66405	4.90501	4.95947	4.9011	4.82495	3.1683	4.1977	4.31455
ZGC:55558	NA	0.579576	1	-0.97639	0.54397	-1.55597	0.143396		2.71968	4.39794	4.17737	4.50912	4.56273	4.17348	2.69931	3.40912	3.64142
ENSNFUG00015002406	CLDN5B	-1.24455	0.665617	-0.0609211	0.976091	1.18363	0.14429		6.62111	4.704	5.55523	4.44149	4.76568	4.87184	5.49718	5.94016	5.80563
CALR3	NA	-0.677974	0.982497	-1.4656	0.00166752	-0.787626	0.14429		8.36064	8.59058	8.39679	7.92367	7.96754	7.39906	6.55178	6.72182	7.55778
HACL1	NA	-1.22104	1	0.212095	0.915838	1.43314	0.14429		6.28053	4.07137	4.44638	4.13395	4.19208	4.31592	5.78519	5.41394	5.02752
ENSNFUG00015023659	CABZ01049117.1	-1.44832	1	0.36297	0.875774	1.81129	0.14429		5.28274	3.16708	3.31237	3.03057	3.08101	3.52235	5.03085	4.3616	3.96887
CAVIN2B	NA	1.12823	1	-0.411348	0.846246	-1.53957	0.14429		2.97836	3.27709	3.41626	4.2172	3.87862	3.92936	3.35577	2.63405	3.04255
ENSNFUG00015004170	MRPL32	-0.52408	1	0.311066	0.755069	0.835146	0.14429		5.66024	5.33268	5.13558	5.09769	4.94356	4.67439	5.78519	5.80427	5.3609
ENSNFUG00015023650	BSG	0.758988	1	-0.598443	0.70096	-1.35743	0.14429		4.96192	7.51293	7.61006	7.89235	7.80434	7.81955	5.87991	6.13402	7.19004
ENSNFUG00015004230	BTG1	-0.0905471	1	1.61873	0.248824	1.70928	0.14429		9.71371	5.35794	7.38529	8.16293	7.94159	8.81574	10.2836	10.0889	9.73452
BRK1	NA	-0.843518	1	0.3405	0.814851	1.18402	0.14468		5.28274	4.00896	4.34471	3.85083	4.11987	3.83786	5.18722	4.82194	4.65519
ENSNFUG00015006125	IDO1	-0.614535	1	0.379691	0.755237	0.994226	0.14468		11.7241	9.88624	10.5508	10.389	10.0819	10.4357	11.4355	11.4558	10.9648
VPS26B	NA	0.448824	1	-1.00772	0.481848	-1.45654	0.14468		3.19764	4.07137	3.84643	4.13395	4.19208	4.01541	2.69931	3.25084	3.37284
ENSNFUG00015000520	OXA1L	-0.0234749	1	0.747523	0.231113	0.770998	0.14468		5.76691	5.11292	5.19522	5.37649	5.175	5.46795	5.99725	5.99112	6.16654
ENSNFUG00015006342	TBL2	-0.0317481	1	-1.39711	0.194035	-1.36536	0.14468		3.96742	6.35015	5.38643	5.44716	5.89068	5.12505	4.42388	4.50876	4.06336
ATF6	NA	-0.312294	1	-2.6648	0.122953	-2.3525	0.14468		2.71968	4.58069	3.20041	3.74259	3.47758	3.39972	2.39162	2.35158	2.61347
ENSNFUG00015000727	FIS1	-0.132452	1	0.503964	0.373195	0.636416	0.145315		6.41784	5.94607	6.1448	6.12305	5.99529	6.01923	6.64465	6.57922	6.72447
CD74A	NA	3.18494	0.00897993	1.65236	0.285094	-1.53258	0.145649		2.40426	2.77547	2.94649	5.72827	4.19208	4.01541	3.52165	3.80059	3.64142
TMEM11	NA	-1.08018	0.666808	-0.0525267	0.976091	1.02766	0.145649		5.92884	5.63087	4.97473	4.44149	4.5072	4.82495	5.99725	4.98167	5.3609
MET	NA	-0.897326	1	0.721552	0.671467	1.61888	0.145649		4.62633	2.91815	3.31237	3.20385	3.08101	3.2657	4.58252	4.28197	3.96887
ENSNFUG00015021979	SGMS1	0.634153	1	-1.04936	0.552552	-1.68351	0.145649		2.71968	3.56429	3.77005	3.9515	3.58877	4.0966	2.69931	2.87017	3.04255
ENSNFUG00015022368	SF3B3	0.4742	1	-1.42382	0.425945	-1.89802	0.145649		2	4.07137	4.11698	4.04561	4.19208	3.92936	2.95278	2.87017	2.8439
ENSNFUG00015022134	HSD17B3	1.18783	1	-0.448669	0.844715	-1.6365	0.145708		2.71968	3.64858	2.94649	4.04561	3.9636	3.92936	3.1683	2.63405	3.04255
ENSNFUG00015014865	FADD	-0.311425	1	0.646119	0.467566	0.957544	0.145708		4.54872	4.44584	4.34471	4.13395	4.19208	4.24646	5.28277	4.7645	4.87954
ENSNFUG00015018263	ASF1B	-0.0939425	1	-2.16297	0.179673	-2.06903	0.145708		2.71968	4.34839	3.84643	3.62558	4.04385	3.52235	2.69931	2	3.04255
ENSNFUG00015013355	DTD2	-0.802707	1	0.244342	0.852608	1.04705	0.145811		5.28274	4.74287	4.34471	3.74259	4.44944	4.17348	4.97472	4.98167	5.11836
ENSNFUG00015023099	PELO	0.0451437	1	-0.882141	0.248824	-0.927284	0.145811		5.58447	6.37511	6.32911	6.28616	6.14834	6.13907	4.72543	5.12546	5.8854
ENSNFUG00015008426	OLA.2605	-0.390077	1	0.791727	0.481949	1.1818	0.146363		5.23399	4.07137	4.44638	4.44149	4.26085	4.24646	5.78519	5.45082	4.46059
ENSNFUG00015023595	CDK4	0.140424	1	-0.824882	0.332211	-0.965305	0.146363		4.77006	5.65144	5.25248	5.33981	5.57677	5.30666	4.14748	4.50876	4.93057
UQCR10	NA	-0.650995	1	0.221224	0.845994	0.872219	0.146804		7.7816	6.72492	6.81114	6.32421	6.77221	6.52374	7.77191	7.28845	7.03544
ORMDL1	NA	-0.472348	1	0.458662	0.643921	0.93101	0.146804		5.62285	4.74287	4.75457	4.69484	4.44944	4.82495	5.45677	5.41394	5.56847
UGGT1	NA	0.741817	1	-0.873585	0.628245	-1.6154	0.146804		2.97836	3.37931	3.77005	3.9515	3.78832	4.0966	2.69931	2.63405	3.37284
ENSNFUG00015007082	ADIPOR1A	0.777139	1	-0.996163	0.602675	-1.7733	0.146804		2.40426	4.29708	4.39644	4.69484	4.61621	4.44556	2.39162	3.07302	3.96887
CCT5	NA	0.0439349	1	-0.76271	0.255597	-0.806645	0.146804		6.1552	7.12871	7.14182	7.01278	6.88543	6.88542	5.93978	5.99112	6.47231
ACBD3	NA	-0.273031	1	-2.4455	0.131449	-2.17247	0.146804		2.71968	5.22698	3.31237	4.2172	3.9636	3.74016	2.69931	2.35158	3.04255
ENSNFUG00015000421	MMD	-0.648611	1	-2.22375	0.0326373	-1.57513	0.146804		3.84289	4.8176	4.39644	4.2172	4.04385	3.39972	2.69931	3.07302	3.04255
ZNF1035	NA	-0.819974	1	0.77393	0.63084	1.5939	0.146999		4.08205	3.64858	2.80053	3.03057	3.08101	3.11794	4.50538	4.1977	3.51337
SI:CH211-262H13.5	NA	0.955708	0.665617	0.0633364	0.966891	-0.892371	0.147447		8.26074	9.17054	9.02512	9.66753	9.76427	10.0113	8.2802	8.63287	9.56925
ENSNFUG00015001337	Nfu_g_1_007201	-0.780821	1	1.18808	0.522125	1.9689	0.147447		3.96742	2.43922	2.80053	2.83359	2.73925	2.76742	4.50538	3.68153	3.37284
ENSNFUG00015012648	SREBF2	0.0440526	1	-1.36421	0.24049	-1.40826	0.147447		3.84289	4.95636	4.23533	4.85937	4.5072	3.92936	3.92858	3.07302	3.21712
ENSNFUG00015001761	HPX	0.886838	0.483665	0.135394	0.901659	-0.751444	0.14817		11.8401	12.4116	12.6336	13.1256	13.2873	13.2384	11.9884	12.2781	12.9588
SMAD7	NA	-0.178315	1	1.02452	0.327645	1.20284	0.148297		4.77006	3.37931	4.49464	3.85083	4.38928	4.17348	5.28277	5.45082	4.65519
ENSNFUG00015002846	WDR45	0.160506	1	1.52332	0.145649	1.36281	0.148851		3.19764	2.77547	3.51316	3.35853	3.22565	3.2657	4.3375	4.01277	4.31455
MRPL27	NA	-0.661729	1	0.227689	0.845994	0.889418	0.149295		9.50353	8.17698	8.28115	8.20941	8.23445	7.9289	9.32239	8.80653	8.84468
ENSNFUG00015016608	Nfu_g_1_021000	0.823549	0.597617	0.0762294	0.949372	-0.747319	0.149546		5.54504	6.24577	6.43185	6.79975	6.73643	7.19294	6.32365	6.08794	6.2085
ENSNFUG00015003359	BUD31	-0.648235	1	0.265356	0.817505	0.913591	0.149711		5.32991	4.74287	4.90501	4.44149	4.5072	4.3822	5.53648	5.12546	4.97986
MCEE	NA	-0.764432	1	0.692258	0.662133	1.45669	0.149826		5.23399	3.16708	3.84643	3.62558	3.47758	4.01541	4.91632	4.82194	4.87954
ENSNFUG00015014458	TIMM21	-0.220673	1	0.776463	0.381862	0.997136	0.150139		4.37971	4.07137	4.11698	4.13395	3.78832	4.0966	4.91632	4.70469	4.82664
ENSNFUG00015024636	RNF14	0.254323	1	-1.73621	0.327486	-1.99054	0.150166		2.71968	3.94373	3.51316	3.49822	3.87862	3.63536	2	2.63405	3.04255
ENSNFUG00015011572	NUCB2B	0.0505741	1	-1.46398	0.246154	-1.51455	0.150166		4.08205	6.77266	4.63045	5.91439	5.84661	5.30666	4.3375	4.50876	4.31455
ENSNFUG00015002972	UBE2I	0.200398	1	1.21364	0.106534	1.01324	0.150166		4.62633	3.80369	4.44638	4.50912	3.9636	4.82495	5.08488	5.48678	5.43346
HSPE1	NA	-1.51522	0.326304	-0.335915	0.833554	1.1793	0.150401		9.68225	7.6316	7.71055	7.14622	7.33149	7.06764	8.7122	8.23858	7.98338
ENSNFUG00015024141	FAM53B	1.03004	1	-0.594062	0.777148	-1.6241	0.150401		3.38794	2.91815	5.07338	5.183	5.0249	4.67439	3.1683	3.68153	4.06336
ENSNFUG00015010402	SERBP1	-0.298307	1	0.385208	0.59246	0.683515	0.150401		7.00213	6.82794	6.65	6.51724	6.52902	6.5813	7.54017	7.24711	6.70994
ENSNFUG00015008842	RNF7	-0.32201	1	0.595887	0.517569	0.917897	0.150401		6.12878	4.9229	5.30756	5.33981	5.2102	5.12505	6.32365	6.06434	5.77803
DDOST	NA	-0.237723	1	-1.10133	0.0746235	-0.863606	0.150401		6.58268	7.15776	7.01519	6.62786	6.86349	6.63665	5.18722	5.71614	6.47231
ENSNFUG00015016299	TSR2	-0.679007	1	0.176238	0.87679	0.855245	0.150498		4.96192	5.33268	5.04124	4.57372	4.61621	4.44556	5.18722	5.52186	5.11836
ENSNFUG00015003377	RAN	-0.215011	1	0.363415	0.54	0.578426	0.150498		6.79924	6.66547	6.5846	6.43268	6.58373	6.40124	6.83006	7.16071	7.08133
ENSNFUG00015016836	DHDDS	-0.823304	1	-3.34497	0.0605628	-2.52167	0.151512		2.40426	6.68556	3.91897	4.57372	5.06391	4.17348	2	3.55175	2.8439
ENSNFUG00015016578	EDEM3	0.0387748	1	-1.61898	0.24117	-1.65775	0.152211		3.19764	3.80369	3.98804	3.74259	3.87862	3.63536	2.69931	3.07302	2.61347
ENSNFUG00015007723	PPIB	-0.487393	1	0.265194	0.782026	0.752587	0.152257		11.4077	10.4325	10.3951	10.3434	10.3539	10.3189	11.3656	11.0529	10.7936
CARD19	NA	-0.226213	1	-1.60556	0.114988	-1.37934	0.152463		4.08205	4.39794	4.17737	4.04561	4.32649	3.74016	2.69931	3.40912	3.21712
NDUFB3	NA	-1.27818	0.744583	-0.0414874	0.98435	1.23669	0.152522		9.3317	7.15055	7.20846	6.87858	7.19757	6.98475	8.66421	7.97936	7.95285
GNAI2A	NA	-0.244907	1	0.582355	0.462849	0.827262	0.152962		5.28274	5.05232	5.00837	4.95947	4.9011	4.82495	5.91015	5.74612	5.16172
ENSNFUG00015009444	ESYT2	-0.00126748	1	-1.6174	0.224332	-1.61613	0.152962		3.55604	3.64858	3.91897	3.85083	3.78832	3.52235	2.69931	2.87017	2.8439
ENSNFUG00015004828	DYNLT3	-1.08553	1	0.161418	0.925716	1.24695	0.153441		5.18352	3.72822	4.39644	3.85083	3.69199	3.52235	4.79191	4.43705	4.71464
ENSNFUG00015004572	NELFA	-0.220505	1	1.48477	0.307741	1.70527	0.15356		3.70658	2.43922	2.80053	2.83359	2.73925	3.11794	4.14748	3.91058	3.75902
PPP1R3G	NA	0.239583	1	0.977162	0.0648683	0.73758	0.15356		7.47043	6.87244	7.37243	7.34438	7.39406	7.70769	7.60631	8.41223	8.47522
ENSNFUG00015023073	OLA.27416	0.209123	1	1.2668	0.112559	1.05768	0.154221		4.69999	3.94373	3.51316	4.50912	4.04385	4.17348	5.18722	4.98167	5.24472
ENSNFUG00015012162	SUCO	-0.744375	1	0.861906	0.590953	1.60628	0.154721		4.18824	3.04797	2.94649	3.03057	2.92022	3.11794	4.42388	3.68153	3.96887
COX19	NA	0.118841	1	1.16443	0.152041	1.04559	0.154721		4.08205	3.87541	3.98804	4.04561	3.69199	4.3822	5.23579	4.93036	4.52842
ENSNFUG00015016019	DNAJC11	-0.144718	1	-1.40026	0.146814	-1.25555	0.154721		3.70658	5.25414	5.16571	4.7518	4.81224	4.72634	3.35577	3.80059	4.06336
ENSNFUG00015009770	STIP1	0.168862	1	-0.966406	0.349762	-1.13527	0.155247		3.84289	5.35794	5.50899	5.30218	5.2102	5.23674	4.42388	4.01277	4.38941
ENSNFUG00015014336	Nfu_g_1_012083	0.651381	0.393486	1.17344	0.000131294	0.522057	0.15546		14.5707	14.0746	14.1065	14.8131	14.9731	14.9689	15.3048	15.4035	15.6023
HYPK	NA	-0.897579	0.987955	0.109717	0.942878	1.0073	0.15546		5.62285	5.17107	4.75457	4.2959	4.66777	4.31592	5.6838	5.3761	4.71464
ENSNFUG00015005116	HEBP2	1.06704	0.998143	-0.162181	0.930774	-1.22922	0.15546		3.38794	4.4922	4.83175	5.183	5.34301	5.37336	3.35577	4.1977	4.82664
ENSNFUG00015015217	UBXN4	-0.294024	1	0.55005	0.515052	0.844074	0.15546		4.90076	4.58069	5.10482	4.69484	4.61621	4.56451	5.53648	5.21394	5.3232
ENSNFUG00015011539	ACOX3	0.326208	1	-0.808577	0.47321	-1.13478	0.15546		4.08205	5.80626	6.06712	5.69961	6.07384	5.79431	4.65575	4.7645	5.07365
ENSNFUG00015019336	CTNNAL1	-0.0945982	1	1.20896	0.279436	1.30356	0.15546		4.77006	3.27709	3.51316	3.62558	3.69199	4.24646	5.18722	4.57707	4.97986
CANT1A	NA	-0.336095	1	-1.76349	0.0896458	-1.4274	0.15546		3.55604	5.08293	4.49464	4.2172	4.38928	4.17348	3.35577	2.87017	3.51337
ENSNFUG00015005998	Nfu_g_1_020393	-0.635458	1	-2.87072	0.0701584	-2.23527	0.15546		4.46669	3.47476	3.60397	3.49822	3.69199	3.11794	2	2	3.04255
ENSNFUG00015022557	CDC42L2	0.255486	1	-0.877978	0.419005	-1.13346	0.155707		4.90076	6.23218	6.20406	6.14447	6.20179	6.10022	4.14748	4.93036	5.77803
ENSNFUG00015005086	FOXRED1	0.387893	1	-1.61196	0.395136	-1.99985	0.155707		2.40426	3.56429	3.84643	3.74259	3.69199	3.63536	2	2.87017	2.8439
ENSNFUG00015008794	GADD45AB	-1.36193	0.882622	0.0476982	0.983266	1.40963	0.155894		4.54872	3.37931	4.39644	3.49822	2.92022	3.2657	4.50538	4.10819	3.96887
OTOS	NA	-1.00246	1	0.609131	0.742641	1.61159	0.15613		4.37971	2.91815	3.31237	3.03057	3.08101	2.9533	4.42388	3.91058	3.75902
ENSNFUG00015017250	AGPAT5	0.302696	1	-2.11666	0.332211	-2.41936	0.15613		2	4.44584	3.31237	3.74259	4.11987	3.52235	2.69931	2	2.8439
ENSNFUG00015016529	TPD52L2	0.516699	1	-0.956986	0.545033	-1.47369	0.156513		3.19764	3.56429	3.84643	3.9515	3.87862	4.01541	2.69931	3.07302	3.21712
SSB	NA	0.0266451	1	-1.0603	0.248824	-1.08694	0.156513		4.18824	5.84251	5.36061	5.37649	5.37439	5.23674	4.58252	4.28197	4.31455
ENSNFUG00015019661	PROC	0.181271	1	0.772629	0.0730034	0.591358	0.156513		8.4752	7.74603	7.92387	8.13644	8.26406	8.35736	8.84728	8.88946	8.78353
PREP	NA	0.0580998	1	-1.34292	0.263182	-1.40102	0.156866		3.38794	4.8176	4.17737	4.57372	4.32649	4.01541	3.35577	3.55175	3.04255
HSPA4B	NA	0.1826	1	-1.04428	0.35244	-1.22688	0.156993		3.55604	5.35794	5.10482	4.95947	5.175	5.00399	3.92858	4.3616	3.75902
ENSNFUG00015001676	PAIP2	-0.11416	1	0.625749	0.34999	0.739909	0.156993		6.01794	5.25414	5.48529	5.5789	5.31094	5.58513	6.18211	6.22199	6.14509
ENSNFUG00015021426	CLPTM1L	0.622764	1	-0.811615	0.614936	-1.43438	0.157877		2.71968	3.87541	4.11698	4.2172	4.11987	4.24646	3.35577	3.07302	3.21712
ENSNFUG00015024212	COL1A2	-2.03552	0.665617	-4.2174	0.00129368	-2.18188	0.157928		4.62633	3.37931	6.92999	4.2172	3.9636	3.74016	2.39162	2.87017	2.8439
FAM20C	NA	1.56935	0.584127	0.174364	0.942993	-1.39499	0.158497		2.71968	3.27709	3.20041	4.04561	4.38928	4.01541	3.35577	2.87017	3.37284
ENSNFUG00015014066	VAPB	0.417827	1	-0.627942	0.57787	-1.04577	0.158497		3.96742	5.50085	5.16571	5.33981	5.49348	5.40558	4.24562	4.50876	4.71464
ENSNFUG00015013479	PDIA3	-0.363008	1	-1.03684	0.0232775	-0.673831	0.158727		7.7731	8.11906	7.91503	7.60613	7.74556	7.39104	6.57084	6.72182	7.36719
RBM5	NA	-0.867091	1	0.35914	0.826724	1.22623	0.159141		6.63994	4.74287	4.83175	4.7518	4.85736	5.04549	6.3679	5.86017	5.69192
IPO4	NA	-0.292766	1	-2.1814	0.128207	-1.88863	0.159141		3.38794	3.72822	3.77005	3.62558	3.47758	3.2657	2.69931	2.63405	2.3391
ZGC:162816	NA	-0.963711	1	0.307615	0.85707	1.27133	0.159556		6.58268	4.4922	4.90501	4.7518	4.71755	4.77649	6.301	5.83249	5.39763
CYP8B1.2	NA	0.583838	1	-0.751095	0.608442	-1.33493	0.160241		5.5045	8.03934	8.28801	8.13644	8.49927	8.1495	6.07939	6.78095	7.62128
CALUB	NA	-0.826384	1	-2.74797	0.0395056	-1.92159	0.160727		3.38794	5.80626	3.77005	4.13395	4.38928	3.63536	3.1683	2.63405	2.8439
ENSNFUG00015000034	ND6	-0.796193	1	0.466763	0.774625	1.26296	0.161023		9.7789	7.42604	7.61553	7.74585	8.20857	7.72055	9.50686	9.26826	8.53416
LDB1A	NA	-0.647624	1	0.58152	0.666934	1.22914	0.161023		4.62633	3.87541	3.84643	3.85083	3.47758	3.63536	4.85546	4.87717	3.86776
ENSNFUG00015024996	OLA.11839	-0.0491955	1	1.14766	0.263563	1.19685	0.161023		4.69999	3.94373	3.60397	3.9515	4.38928	3.83786	5.61202	4.98167	4.38941
AMACR	NA	0.807874	1	-0.466851	0.78821	-1.27473	0.161926		3.19764	3.80369	4.23533	4.37053	4.5072	4.50626	3.1683	3.25084	3.96887
ENSNFUG00015017764	BX530018.2	-0.437217	1	0.404794	0.676467	0.842012	0.161926		6.5432	5.56732	5.50899	5.51454	5.60349	5.46795	6.57084	6.15652	6.18767
ENSNFUG00015004215	SLC22A18	0.501757	1	-0.64742	0.614936	-1.14918	0.161926		3.96742	5.5455	5.13558	5.41226	5.68082	5.37336	3.67042	4.82194	4.71464
SERF2A	NA	-0.633329	1	0.172879	0.879844	0.806208	0.162086		7.45987	7.06111	6.38139	6.53357	6.52902	6.15811	7.50096	7.21532	6.78118
ERGIC2	NA	-0.549192	1	-2.81363	0.0949897	-2.26444	0.162086		2	5.17107	4.23533	4.2172	3.9636	3.39972	2.69931	2.63405	2.61347
OGT.2	NA	-1.40065	0.899942	0.0475842	0.98435	1.44823	0.162516		6.25632	4.44584	4.17737	3.85083	4.32649	4.01541	5.91015	5.07911	4.5932
LAMTOR3	NA	-0.546187	1	0.264656	0.803542	0.810842	0.162516		6.8159	5.7878	6.00183	5.78394	5.75422	5.69351	6.68018	6.62834	6.16654
ENSNFUG00015019828	TM2D1	0.0425567	1	0.877211	0.204955	0.834654	0.162516		4.37971	4.74287	4.54135	4.80658	4.38928	4.62049	5.18722	5.3761	5.43346
UQCRH	NA	-1.35932	0.318612	-0.331072	0.806091	1.02825	0.1634		8.1336	6.65532	6.86721	5.93912	6.30309	5.91115	7.44008	7.16071	6.32751
PLEKHA7A	NA	-0.652848	1	0.390446	0.757837	1.04329	0.1634		4.96192	4.29708	4.05395	3.85083	4.04385	3.92936	4.97472	4.70469	4.65519
ENSNFUG00015015299	SMIM13	-0.664558	1	0.215166	0.853854	0.879723	0.163437		5.76691	5.02103	4.97473	4.63555	4.5072	4.91725	5.4152	5.65424	5.3232
ENSNFUG00015021299	GOT2	0.747674	1	-0.124786	0.925716	-0.87246	0.164099		6.2317	7.21417	7.20846	7.674	7.70295	7.68817	6.53247	6.28461	7.4306
ENSNFUG00015019393	MOB2A	0.143589	1	1.57641	0.176963	1.43282	0.164099		4.28715	2.91815	3.51316	4.04561	3.47758	3.63536	5.4152	4.98167	3.75902
CTBS	NA	-0.362439	1	0.434738	0.614936	0.797177	0.164224		5.07697	4.9229	5.36061	4.85937	4.61621	4.96127	5.71839	5.33723	5.50254
ENSNFUG00015014027	RPL32	-0.365335	1	0.457372	0.61924	0.822707	0.164725		10.5919	9.15621	9.66094	9.60901	9.62935	9.44471	10.6735	10.2282	10.196
SFXN1	NA	0.895699	1	-0.31666	0.85473	-1.21236	0.164819		3.70658	4.53712	3.51316	4.63555	4.71755	4.82495	3.52165	3.40912	4.23558
ENSNFUG00015025129	FAAH	0.255563	1	0.905316	0.0582672	0.649754	0.165118		5.86623	5.73093	5.72669	5.86362	6.14834	5.99825	6.58965	6.90572	6.32751
TMEM9	NA	1.30524	1	-0.253613	0.916415	-1.55885	0.165969		2.40426	4.58069	4.71437	5.33981	5.37439	5.3404	3.35577	3.40912	4.82664
ENSNFUG00015008529	DIRC2	-1.23878	1	0.725242	0.755825	1.96402	0.16599		4.28715	2.43922	3.41626	2.83359	2.53227	3.11794	4.65575	4.01277	3.04255
DHCR7	NA	-1.23045	0.926598	-2.5603	0.00199983	-1.32986	0.16643		6.71292	6.82794	8.38723	6.61257	6.44285	5.86554	4.65575	4.01277	5.96098
ENSNFUG00015005986	BYSL	0.172458	1	-1.40979	0.332211	-1.58225	0.16643		2.71968	4.34839	4.05395	3.85083	4.04385	4.17348	2.69931	3.25084	3.04255
ACBD7	NA	-0.0918525	1	1.11664	0.303091	1.20849	0.16643		5.23399	4.24388	3.41626	4.04561	4.56273	4.44556	5.37239	5.77549	4.97986
ENSNFUG00015018135	SAMM50L	-0.307817	1	-2.12421	0.129948	-1.81639	0.16643		2.97836	3.80369	4.23533	3.74259	3.47758	3.52235	2.69931	2.63405	2.61347
PPTC7A	NA	0.756732	1	2.12298	0.0400659	1.36625	0.166631		3.19764	2.91815	3.07903	3.20385	3.08101	4.01541	4.91632	4.64229	3.75902
PCBD1	NA	-0.228568	1	0.56741	0.484856	0.795978	0.167062		9.30539	8.10048	8.21786	8.25937	8.56873	8.4139	9.47434	9.08687	9.02279
RBM39B	NA	-0.955354	0.90193	0.0328312	0.98435	0.988185	0.169905		5.80078	5.35794	4.67302	4.44149	4.66777	4.3822	5.71839	5.3761	4.87954
ENSNFUG00015012901	HSD17B8	-0.785547	1	0.394388	0.790457	1.17994	0.169905		4.90076	3.87541	4.05395	3.62558	3.69199	3.83786	4.14748	4.57707	5.02752
OGFOD3	NA	0.34108	1	-1.50095	0.40409	-1.84203	0.169905		2.40426	4.07137	4.54135	4.13395	4.5072	3.92936	2.39162	2.63405	3.64142
ZNHIT3	NA	-0.902237	1	0.655804	0.70453	1.55804	0.170161		3.84289	3.27709	3.07903	3.03057	2.73925	2.9533	4.24562	3.80059	3.37284
ENSNFUG00015019069	Nfu_g_1_008499	1.3534	0.889201	-0.069629	0.979454	-1.42303	0.171335		2.71968	3.16708	3.60397	4.13395	4.11987	4.24646	2.69931	3.07302	3.64142
ZGC:110366	NA	-0.596054	1	0.847382	0.569054	1.44344	0.171335		4.18824	3.04797	3.31237	3.35853	3.22565	2.9533	3.80526	4.57707	3.96887
ENSNFUG00015020857	ZFAND5A	0.564328	1	1.94524	0.057469	1.38092	0.171437		5.89788	3.37931	6.083	6.03401	5.93344	6.13907	7.9858	7.2986	6.38353
ENSNFUG00015006811	ALDH4A1	1.15726	0.344118	0.284889	0.811947	-0.872372	0.17149		5.95916	7.16493	6.91233	7.86034	7.83849	7.99922	6.60822	6.67584	7.62128
PCF11	NA	-0.532258	1	1.39823	0.444464	1.93048	0.171507		3.70658	2.77547	2.45509	2.83359	2.73925	2.76742	4.58252	3.80059	2.8439
FADS2	NA	-0.884134	1	-1.98505	0.00608715	-1.10092	0.171615		7.87996	8.84621	9.14905	8.09302	7.89367	7.49203	6.07939	5.91398	7.64439
ENSNFUG00015017418	Nfu_g_1_001221	2.25909	0.295477	3.58686	0.000286613	1.32777	0.171767		2.40426	2.91815	2.63813	4.2959	3.58877	4.01541	5.6838	5.17038	3.86776
CYB5R2	NA	-1.40763	0.553335	-2.73111	0.000620238	-1.32349	0.171767		4.90076	5.7878	6.52775	4.80658	5.0249	3.83786	3.92858	3.40912	3.51337
ENSNFUG00015003331	ABCF3	0.183513	1	-0.972919	0.381448	-1.15643	0.171767		3.55604	4.8176	4.58659	4.50912	4.66777	4.62049	3.92858	3.55175	3.64142
TRAP1	NA	0.0841623	1	-1.01127	0.312732	-1.09544	0.171767		3.84289	4.74287	4.71437	4.69484	4.5072	4.56451	3.52165	3.91058	3.75902
CBX5	NA	-0.33228	1	-1.97086	0.12232	-1.63858	0.171767		2.97836	5.25414	4.44638	4.13395	4.61621	3.92936	2.95278	2.87017	3.51337
ENSNFUG00015018238	COPB2	-0.251085	1	-1.5067	0.126253	-1.25561	0.172143		4.08205	6.07351	4.86885	5.09769	5.24457	4.72634	4.04218	4.10819	3.86776
EIF2S2	NA	-0.0096682	1	-1.07346	0.247884	-1.06379	0.172812		4.28715	5.50085	6.06712	5.51454	5.60349	5.27213	4.65575	4.43705	4.52842
UBE2C	NA	-0.845946	1	-3.26117	0.0642428	-2.41523	0.172812		4.37971	3.94373	3.07903	2.83359	3.69199	3.2657	2	2	2.8439
TXNDC5	NA	-0.736488	1	-2.75189	0.0631232	-2.0154	0.172812		2.97836	5.71147	3.60397	3.9515	4.44944	3.52235	2.95278	2.87017	2.61347
GTPBP10	NA	-0.141332	1	0.825836	0.358991	0.967168	0.173177		4.62633	3.87541	4.17737	4.13395	4.04385	4.17348	4.97472	5.07911	4.65519
SLC16A12	NA	-0.496341	1	-1.68356	0.0513956	-1.18722	0.173675		6.10186	4.704	5.33433	4.69484	5.13891	5.20046	3.35577	3.91058	4.5932
NR0B2A	NA	1.51611	0.882622	0.0137188	0.994256	-1.50239	0.173841		4.08205	6.79132	4.11698	7.33509	6.92835	6.81519	5.87991	5.94016	4.77173
CAB39	NA	0.639019	1	-0.873993	0.620912	-1.51301	0.173841		2.97836	4.00896	3.31237	4.04561	3.87862	4.01541	2.95278	2.63405	3.37284
ENSNFUG00015007225	ARL6IP5A	0.385013	1	1.33667	0.0648683	0.951659	0.173841		4.62633	3.80369	3.84643	4.2959	4.11987	4.72634	5.18722	5.33723	5.11836
ENSNFUG00015014558	OLA.4512	-0.44095	1	0.233861	0.797522	0.67481	0.1739		10.1147	9.21095	9.53534	9.11262	9.40465	9.1536	10.1218	9.51892	9.99493
CADM1B	NA	0.213483	1	-1.41104	0.36382	-1.62452	0.173973		3.19764	3.37931	3.98804	3.9515	3.69199	3.52235	2.69931	2.63405	3.04255
ENSNFUG00015002927	ZGC	0.390611	1	-0.781759	0.544094	-1.17237	0.174026		3.55604	4.29708	4.97473	4.63555	4.76568	4.82495	3.67042	3.55175	4.15204
AKR1D1	NA	-0.654307	1	-2.10892	0.0438653	-1.45461	0.174153		5.28274	5.8245	5.10482	4.50912	5.37439	4.50626	2.69931	2.87017	4.65519
ENSNFUG00015009655	RGS5A	0.0995327	1	0.980202	0.181503	0.88067	0.174971		5.69668	4.44584	4.90501	5.26353	5.06391	5.16325	6.02516	6.15652	5.69192
ENSNFUG00015005469	PFKFB4	-0.259701	1	-1.9134	0.151454	-1.6537	0.175817		2.71968	5.30697	5.00837	4.2959	4.9848	4.0966	2.95278	3.68153	3.21712
ABCG5	NA	0.462545	1	-0.703397	0.593517	-1.16594	0.175949		3.38794	5.1993	4.75457	4.91029	5.24457	5.00399	3.80526	4.10819	4.31455
ENSNFUG00015004592	PACSIN3	0.400751	1	-0.941671	0.519219	-1.34242	0.175949		3.38794	4.00896	3.6894	4.04561	4.19208	3.83786	2.95278	3.07302	3.37284
ENSNFUG00015016609	Nfu_g_1_022701	0.0602443	1	-0.902156	0.3095	-0.9624	0.175949		4.83689	5.52335	5.82435	5.54708	5.54954	5.46795	4.04218	4.50876	5.20382
ENSNFUG00015023568	SPINB	-0.131335	1	-1.78206	0.202869	-1.65073	0.175949		2.71968	4.85356	4.17737	4.2172	4.19208	3.83786	3.1683	2.63405	3.21712
ATL3	NA	0.107258	1	-0.987404	0.333573	-1.09466	0.176044		4.08205	4.24388	4.49464	4.44149	4.38928	4.31592	3.35577	3.68153	3.64142
ENSNFUG00015009099	SST1.1	5.19007	0.0621344	2.74276	0.37795	-2.44731	0.178064		2	2.23626	2.24542	5.22383	2.29055	4.91725	2.69931	2	3.64142
ENSNFUG00015012175	SEC63	0.876561	0.91359	-0.0458172	0.979454	-0.922378	0.178064		4.37971	4.18864	4.54135	5.00703	5.0249	5.30666	4.50538	3.80059	4.5932
ENSNFUG00015009581	RRM1	0.273993	1	-1.50171	0.390075	-1.77571	0.178064		2.71968	4.39794	3.60397	3.74259	4.5072	3.39972	2.69931	3.25084	2.61347
ERRFI1A	NA	-0.077442	1	1.3632	0.302794	1.44064	0.178064		4.69999	2.77547	3.98804	3.20385	4.44944	3.83786	5.08488	4.50876	5.53588
ENSNFUG00015007002	CHP1	-0.124121	1	-1.59238	0.202224	-1.46826	0.178064		3.38794	5.08293	3.84643	4.37053	4.26085	4.01541	3.35577	3.07302	3.21712
ENSNFUG00015025176	ELOVL1B	0.352609	1	1.36016	0.0834073	1.00755	0.178064		3.55604	4.29708	3.6894	4.50912	4.11987	3.83786	4.97472	5.25622	4.77173
ENSNFUG00015024847	GIPC3	-0.885434	1	0.614409	0.717852	1.49984	0.178194		3.70658	3.47476	2.94649	2.83359	3.08101	2.76742	3.92858	3.80059	3.64142
ENSNFUG00015015792	CRIPT	-0.363099	1	0.314465	0.70096	0.677564	0.178617		6.01794	5.65144	5.91582	5.37649	5.57677	5.613	5.81746	6.30489	6.28892
ENSNFUG00015000481	FKTN	0.733569	1	-0.651613	0.715639	-1.38518	0.178922		2.97836	3.72822	3.6894	3.9515	4.11987	4.0966	2.69931	3.07302	3.51337
ETF1A	NA	-0.22274	1	-1.68962	0.15937	-1.46688	0.178922		3.38794	6.86365	6.083	5.81099	5.97497	5.66717	4.14748	4.70469	4.65519
PRMT1	NA	-0.100896	1	-1.40125	0.211238	-1.30036	0.179309		4.96192	8.20856	7.53704	7.39889	7.38639	7.17436	5.78519	6.45765	5.8854
ENSNFUG00015022447	COMMD2	-0.3762	1	0.37188	0.672904	0.74808	0.179611		5.4628	5.5455	5.28028	5.14098	5.13891	5.00399	6.15711	5.48678	5.60034
ENSNFUG00015010945	TMEM184B	0.732799	1	-1.15845	0.595789	-1.89125	0.179611		2.40426	3.72822	3.31237	3.9515	3.78832	3.52235	2	2.63405	3.21712
ENSNFUG00015004120	MTX1 ENSNFUG00015004120	-0.316852	1	0.451936	0.59246	0.768788	0.179611		5.23399	4.88864	5.00837	4.69484	4.76568	4.82495	5.64836	5.45082	5.20382
ENSNFUG00015006255	PSMG1	-0.667078	1	-2.58799	0.068852	-1.92091	0.179777		4.08205	4.18864	3.41626	3.85083	3.47758	2.9533	2	2.87017	2.61347
TJP3	NA	-0.729318	1	0.600162	0.697465	1.32948	0.179826		4.54872	3.37931	3.31237	3.35853	3.35711	3.2657	4.42388	4.28197	4.06336
SRRT	NA	-1.05636	1	0.20791	0.911214	1.26427	0.180134		5.32991	3.80369	4.11698	3.74259	3.58877	3.83786	5.03085	4.82194	4.15204
LAMP1B	NA	-0.229367	1	0.831984	0.42036	1.06135	0.180348		3.84289	3.64858	4.11698	3.49822	3.69199	3.92936	4.3375	4.70469	4.52842
C1R	NA	2.20941	9.81906e-05	1.33565	0.040483	-0.873763	0.180359		5.62285	6.54967	6.94744	8.53962	8.55168	8.81274	7.26393	7.46106	8.35895
COMMD7	NA	-0.390019	1	0.846146	0.500626	1.23616	0.180359		3.84289	3.47476	3.60397	3.74259	3.35711	2.9533	4.14748	4.57707	3.96887
STAU2	NA	0.936534	0.99278	-0.0738319	0.968768	-1.01037	0.180613		4.28715	5.35794	5.72669	6.05679	5.93344	6.35248	4.72543	4.82194	5.77803
ENSNFUG00015021992	HER9	-0.758643	1	0.375519	0.799652	1.13416	0.180613		4.77006	3.80369	4.44638	3.74259	3.69199	3.92936	4.72543	5.07911	4.06336
POLR2L	NA	-0.622734	1	0.109747	0.92328	0.732481	0.180645		6.01794	5.52335	5.87992	5.183	5.40509	5.12505	6.18211	5.94016	5.56847
ENSNFUG00015018661	GCGR	0.563108	1	-0.364725	0.774625	-0.927833	0.18089		4.62633	4.18864	4.63045	4.7518	5.06391	5.04549	4.14748	3.91058	4.46059
ENSNFUG00015008079	RCSD1	-1.62515	1	0.178392	0.949372	1.80354	0.180911		4.90076	2.77547	3.20041	2.83359	2.92022	2.9533	4.14748	4.28197	3.51337
LYRM5A	NA	-0.891115	1	0.639363	0.720204	1.53048	0.181558		4.08205	2.91815	3.31237	3.03057	2.92022	2.9533	4.24562	3.40912	3.96887
GLS2B	NA	0.236335	1	-0.838558	0.445602	-1.07489	0.181558		5.41985	5.33268	5.16571	5.183	5.62973	5.69351	3.80526	3.91058	5.39763
ARIH1	NA	0.783642	1	-0.61267	0.749876	-1.39631	0.181935		3.55604	3.37931	3.41626	4.2172	3.78832	3.92936	2.95278	2.63405	3.51337
ENSNFUG00015001762	NOA1	0.0979993	1	-1.37783	0.321706	-1.47583	0.181935		3.19764	3.80369	4.11698	3.74259	3.78832	4.01541	2.95278	2.63405	3.21712
ENSNFUG00015023001	C2H1ORF27	-0.793198	1	0.283233	0.845994	1.07643	0.182617		4.90076	4.98906	4.23533	4.37053	4.11987	3.74016	5.4152	5.07911	4.23558
ENSNFUG00015009921	BLOC1S1	-0.532329	1	0.604802	0.638955	1.13713	0.182617		4.62633	3.64858	4.39644	3.62558	3.69199	4.17348	4.58252	5.21394	4.31455
GYS2	NA	0.461841	1	-0.300686	0.774625	-0.762528	0.183002		5.32991	5.33268	5.38643	5.61004	5.73017	5.95536	4.72543	4.87717	5.50254
HJV	NA	0.470658	1	-1.86835	0.433798	-2.33901	0.183056		2.40426	3.04797	4.44638	3.85083	4.19208	3.63536	2	2	3.37284
CMPK	NA	-0.435339	1	-1.67941	0.0777772	-1.24407	0.183056		4.69999	5.96263	5.98503	5.41226	5.27813	5.12505	3.1683	3.80059	5.02752
ENSNFUG00015019656	OLA.12830	-0.587513	1	0.788256	0.602675	1.37577	0.183689		4.62633	3.27709	3.41626	3.35853	3.35711	3.63536	5.03085	4.1977	3.96887
ENSNFUG00015023787	GMPPAA	0.113407	1	-1.25018	0.333573	-1.36359	0.183689		3.38794	4.53712	4.29106	4.37053	4.32649	4.0966	2.39162	3.68153	3.51337
ENSNFUG00015013104	Nfu_g_1_016132	-0.0246944	1	0.624612	0.302794	0.649307	0.183901		6.5432	6.17648	6.083	6.43268	6.33534	5.93342	7.10306	6.87891	6.58808
ARF6A	NA	-0.157557	1	-1.53797	0.19333	-1.38041	0.18407		3.84289	6.8548	5.60005	5.93912	6.0351	5.16325	4.65575	4.43705	4.52842
NDUFAF2	NA	-0.666188	1	0.331926	0.805916	0.998114	0.184197		6.12878	4.704	4.90501	4.63555	4.9011	4.77649	5.93978	5.3761	5.63151
DENR	NA	0.0418918	1	-0.662813	0.318329	-0.704705	0.184197		5.58447	6.32476	5.96804	6.01087	5.93344	6.1769	5.32828	5.3761	5.46841
ITIH3B.2	NA	1.98067	0.000102321	1.19426	0.0407935	-0.786406	0.184819		9.04418	9.75454	10.04	11.5805	11.5018	11.8366	10.4395	10.4629	11.4419
ENSNFUG00015021187	AKR7A3	-0.311659	1	0.326803	0.668006	0.638462	0.184819		6.5432	5.89522	6.05107	5.86362	5.82406	5.95536	6.49306	6.38329	6.5721
ENSNFUG00015019083	DDX54	0.324404	1	-1.35625	0.432247	-1.68065	0.185336		2.97836	3.80369	3.31237	3.49822	3.9636	3.39972	2.95278	2.63405	2.61347
COA8	NA	-0.255901	1	0.98624	0.42036	1.24214	0.185744		2.97836	3.56429	4.11698	3.20385	3.58877	3.63536	4.79191	4.10819	4.23558
ENSNFUG00015012281	ARL2	-0.897089	1	0.386405	0.816077	1.28349	0.186883		4.18824	3.37931	3.6894	3.35853	3.08101	3.11794	3.92858	4.1977	3.96887
CELF2	NA	0.878415	1	-0.673715	0.755069	-1.55213	0.186883		2.40426	3.64858	3.84643	4.13395	4.11987	4.01541	2.39162	3.07302	3.51337
FUBP1	NA	0.206156	1	-0.732974	0.453512	-0.93913	0.186883		4.69999	5.69173	4.97473	5.54708	5.60349	4.91725	4.79191	4.50876	4.38941
ENSNFUG00015016034	HARS	0.10833	1	-0.809861	0.367427	-0.918191	0.186883		4.62633	5.8245	5.70634	5.54708	5.6555	5.58513	4.3375	4.7645	5.11836
ENSNFUG00015006902	CABZ01043370.1	-0.0255308	1	-1.26327	0.257003	-1.23774	0.186883		3.38794	4.58069	4.63045	4.44149	4.32649	4.17348	3.1683	3.55175	3.51337
ID3	NA	0.147665	1	0.944463	0.153971	0.796798	0.186883		6.86476	5.73093	6.00183	6.20691	6.50086	6.49407	6.76536	7.50556	7.15828
ENSNFUG00015009543	STAT2	0.482967	1	-0.410495	0.727922	-0.893462	0.187621		4.18824	4.95636	5.16571	5.22383	5.43516	5.16325	4.3375	4.3616	4.77173
ENSNFUG00015014427	DRG1	0.0651058	1	-1.01137	0.325915	-1.07648	0.187621		3.84289	5.61	5.16571	5.05307	5.2102	5.12505	4.24562	4.28197	4.15204
ATP8A2	NA	0.571034	1	-0.634833	0.677057	-1.20587	0.187642		3.38794	3.87541	3.84643	4.13395	4.19208	4.17348	3.52165	3.07302	3.37284
ENSNFUG00015011802	NUDT3	0.702551	1	-0.831095	0.66578	-1.53365	0.187642		2.97836	3.72822	3.07903	3.74259	3.87862	3.74016	2.95278	2.63405	3.04255
TRUB2	NA	1.06714	1	-0.508744	0.833835	-1.57588	0.187664		2.40426	3.37931	3.31237	3.74259	4.04385	3.63536	2.95278	2.63405	3.04255
COX7A1	NA	-0.158549	1	0.710496	0.42036	0.869045	0.187664		7.49133	6.25924	6.20406	6.53357	6.8745	6.40124	7.73014	7.52298	7.04705
ENSNFUG00015022912	SUCLG2	0.186868	1	-0.918388	0.416148	-1.10526	0.187664		4.54872	5.8245	5.64351	5.26353	5.77788	5.76976	4.04218	4.10819	5.3609
ENSNFUG00015014606	IMMT	-0.757577	1	0.245872	0.857094	1.00345	0.188043		4.96192	4.29708	4.34471	3.85083	4.11987	3.83786	5.03085	4.82194	4.31455
TM4SF21A	NA	2.43082	1	-0.340083	0.94502	-2.7709	0.188081		3.19764	2.43922	2.24542	5.05307	3.47758	2.30343	2	2	3.21712
NDUFS3	NA	-0.121447	1	0.391102	0.46402	0.512549	0.188166		6.97271	6.65532	6.70231	6.59711	6.69974	6.67681	7.17955	7.09234	7.19004
TRIM105	NA	-0.276438	1	0.960919	0.446325	1.23736	0.188166		5.13123	3.04797	4.34471	4.2959	3.9636	4.17348	5.49718	4.93036	5.07365
EEF1DB	NA	-0.244962	1	0.405764	0.580274	0.650726	0.188362		6.63994	5.91237	6.32911	6.14447	6.01533	6.0804	6.92198	6.67584	6.47231
VTNA	NA	0.497034	1	-0.148693	0.879839	-0.645728	0.188633		7.50166	7.42604	7.27906	7.7598	7.94682	7.95636	6.66252	7.23659	7.68953
OARD1	NA	-1.17421	1	0.465759	0.832657	1.63997	0.188633		4.28715	2.61712	3.51316	3.03057	2.53227	3.11794	4.04218	3.68153	3.96887
ENSNFUG00015023522	KDELR2A	-0.211888	1	-1.31801	0.151856	-1.10612	0.188633		4.62633	6.74421	6.49253	6.07922	6.14834	5.81845	4.50538	5.29729	5.11836
ENSNFUG00015018920	NAP1L4A	0.127183	1	-1.27267	0.351061	-1.39985	0.188637		3.38794	5.35794	3.98804	4.57372	4.71755	4.56451	2.95278	3.80059	3.75902
ENSNFUG00015019484	PHB2	0.551893	1	-0.225349	0.843411	-0.777242	0.188828		5.07697	5.99519	6.12959	6.41516	6.25333	6.35248	5.45677	5.3761	5.93623
ENSNFUG00015002074	YIPF4	-0.236292	1	0.398281	0.575626	0.634573	0.189423		6.01794	5.92932	5.66476	5.67036	5.84661	5.40558	6.34594	6.26403	6.12332
ENSNFUG00015022497	NET1	0.345278	1	-0.907784	0.515052	-1.25306	0.189423		4.28715	3.87541	3.98804	4.2959	4.19208	4.44556	2.69931	3.07302	4.06336
ENSNFUG00015002349	VARS	-0.232384	1	-1.54067	0.153938	-1.30828	0.189423		3.70658	4.07137	4.75457	3.9515	4.11987	4.17348	2.95278	3.07302	3.51337
ENSNFUG00015021082	WDR77	-0.493348	1	-1.85103	0.0745041	-1.35768	0.189906		3.70658	4.9229	4.39644	4.13395	4.26085	3.74016	3.52165	3.07302	2.8439
ENSNFUG00015015189	SLIRP	-1.31051	0.0763607	-0.529998	0.542052	0.78051	0.190269		8.73816	7.66233	7.79006	6.8397	6.89628	6.85073	7.99993	7.59063	7.15828
ENSNFUG00015002316	SCARA3	0.530306	0.868961	1.02265	0.00179157	0.492346	0.190269		7.01662	7.24834	7.30636	7.65919	7.82152	7.66839	8.00694	8.39814	8.17544
ENSNFUG00015006963	ARL8B	0.290165	1	-1.40727	0.42036	-1.69743	0.190269		2.40426	4.34839	4.54135	4.2172	4.44944	4.17348	2.39162	2.87017	3.75902
ENSNFUG00015018889	USP10	0.150001	1	-1.23007	0.367427	-1.38007	0.190269		3.38794	4.74287	3.77005	3.9515	4.66777	3.92936	3.35577	3.25084	3.21712
APOA4A	NA	0.11718	1	5.77547	0.267414	5.65829	0.190269		2.40426	2	2	2.33423	2	2	3.35577	2	5.63151
THRSP	NA	-1.30435	0.415876	-0.324208	0.817732	0.98014	0.191019		10.9954	9.71355	9.85946	9.36391	9.24831	8.13995	9.49194	9.68483	10.5513
CYFIP1	NA	0.728208	1	-0.557171	0.756969	-1.28538	0.191019		3.19764	3.64858	3.84643	4.13395	4.04385	4.24646	2.69931	3.68153	3.21712
RAD21A	NA	0.535988	1	-0.461937	0.730705	-0.997924	0.191019		4.28715	4.34839	4.67302	4.85937	5.0249	4.82495	3.52165	3.80059	4.65519
ENSNFUG00015004293	CUL3	0.621539	1	-0.652471	0.693108	-1.27401	0.191019		3.19764	3.64858	3.84643	4.04561	3.9636	4.17348	2.95278	3.40912	3.21712
ENSNFUG00015022055	DPM2	-0.32791	1	0.425413	0.626203	0.753323	0.191019		5.37558	4.74287	5.25248	4.80658	4.81224	4.91725	5.4152	5.52186	5.60034
SLC25A46	NA	-0.373368	1	0.763811	0.526461	1.13718	0.191019		3.84289	3.56429	3.60397	3.35853	3.35711	3.52235	4.04218	4.43705	4.15204
ENSNFUG00015019982	VAV3B	-0.299773	1	1.09474	0.42666	1.39451	0.191019		3.96742	2.91815	2.94649	3.03057	3.08101	3.2657	4.24562	3.80059	4.06336
ABCD3A	NA	0.176021	1	-0.844733	0.421392	-1.02075	0.191019		3.84289	4.8176	5.13558	4.85937	4.9848	4.77649	4.24562	3.91058	3.96887
ENSNFUG00015010506	U2SURP	-1.18942	1	0.404989	0.852608	1.59441	0.191257		4.96192	3.16708	3.07903	3.20385	3.08101	3.2657	4.72543	4.1977	3.75902
SRGAP3	NA	-0.551648	1	0.995615	0.558786	1.54726	0.191257		4.96192	2.77547	3.20041	3.20385	3.22565	4.01541	4.65575	4.64229	4.82664
ENSNFUG00015002046	C14H8ORF40	-0.979223	0.793969	-0.0787444	0.959351	0.900478	0.191778		5.62285	5.22698	4.79367	4.37053	4.71755	4.01541	4.91632	5.3761	5.16172
ENSNFUG00015013930	EXOSC7	-0.908235	1	0.107976	0.948288	1.01621	0.191778		5.18352	4.39794	4.23533	3.85083	3.9636	3.92936	5.03085	4.57707	4.52842
SNRPC	NA	-0.673855	1	0.133192	0.915171	0.807046	0.191778		5.73222	5.30697	5.22413	4.80658	4.9848	4.67439	5.84902	5.65424	5.02752
ENSNFUG00015003904	SSTR2	0.48467	1	-0.271278	0.801588	-0.755948	0.191778		4.96192	5.65144	6.01843	5.93912	6.21918	6.06029	5.28277	5.48678	5.3609
LPAR2A	NA	0.154996	1	1.3302	0.202009	1.1752	0.191778		3.96742	3.16708	3.20041	3.62558	3.08101	3.83786	4.3375	4.43705	4.46059
ENSNFUG00015018693	ARF5	-0.255368	1	-1.10367	0.103828	-0.848301	0.191778		5.83388	7.26179	7.17182	6.61257	6.74845	6.5813	5.75218	6.11117	5.63151
GMFG	NA	-1.44616	1	0.404225	0.868035	1.85038	0.192514		4.08205	2.77547	2.94649	2.83359	2.53227	2.55399	4.04218	3.55175	3.04255
NHERF1	NA	-0.504282	1	0.893864	0.553568	1.39815	0.192676		4.08205	3.04797	3.07903	3.20385	2.92022	3.2657	4.42388	3.91058	3.75902
NR5A2	NA	-1.18224	0.274333	-0.34593	0.746231	0.836305	0.193676		5.95916	5.61	5.10482	4.50912	4.5072	4.62049	5.53648	5.17038	5.07365
ENSNFUG00015021863	Nfu_g_1_011208	-0.787029	1	0.0662577	0.966891	0.853286	0.193873		8.38875	6.93251	7.14182	7.00109	6.95972	6.60924	7.86749	7.76182	7.4306
USP5	NA	0.475842	1	-0.773751	0.604166	-1.24959	0.194073		2.97836	4.24388	4.05395	4.13395	4.38928	4.24646	3.1683	3.55175	3.37284
ENSNFUG00015002844	SPR	0.523954	1	-0.482107	0.716322	-1.00606	0.194318		3.70658	4.704	4.54135	5.00703	4.94356	4.56451	3.80526	3.91058	4.31455
ENSNFUG00015022747	RNF121	-0.399301	1	-1.25097	0.0541713	-0.851671	0.194318		5.18352	6.07351	5.74676	5.44716	5.52178	5.08582	4.3375	4.57707	4.87954
ENSNFUG00015013345	SCAF4B	-0.558022	1	0.702736	0.616454	1.26076	0.194443		3.70658	3.47476	3.41626	3.20385	3.08101	3.2657	4.3375	4.01277	3.64142
PLA2G3	NA	-0.585258	1	-2.54073	0.103028	-1.95547	0.196648		2.97836	4.85356	3.6894	3.62558	3.69199	3.63536	2	2.35158	3.21712
TIAL1	NA	0.799626	1	-0.451682	0.805308	-1.25131	0.197234		2.97836	3.87541	4.54135	4.63555	4.66777	4.50626	2.95278	3.80059	3.96887
ENSNFUG00015020810	MRPS16	0.288639	1	-0.662507	0.545146	-0.951145	0.197234		4.08205	4.62297	4.63045	4.7518	4.81224	4.62049	3.92858	3.68153	4.23558
STXBP6	NA	0.149972	1	-0.763538	0.421583	-0.913509	0.197694		4.77006	5.35794	4.90501	5.30218	5.1019	5.12505	3.67042	4.43705	4.82664
HEXIM1	NA	-0.41665	1	0.710235	0.569786	1.12689	0.197814		3.84289	3.72822	4.11698	3.62558	3.69199	3.52235	4.91632	4.50876	3.75902
ENSNFUG00015024656	RANBP3	0.370466	1	-0.96092	0.526154	-1.33139	0.197814		3.38794	4.1312	3.77005	4.2172	4.04385	4.01541	2.39162	3.25084	3.64142
SEC13	NA	-0.0263108	1	-0.982646	0.272274	-0.956336	0.197814		4.69999	6.2046	6.12959	5.81099	5.97497	5.64034	4.79191	4.64229	5.3232
TM4SF4	NA	-1.14245	0.00520053	-0.598515	0.21051	0.543938	0.197849		7.87996	8.14105	8.35164	7.18809	7.01053	6.85073	7.71309	7.59063	7.32966
ENSNFUG00015008926	CABZ01054962.1	2.2148	0.0511482	1.02668	0.451813	-1.18812	0.197849		4.46669	3.04797	2.80053	5.05307	5.0249	5.76976	4.3375	4.28197	4.31455
ENSNFUG00015008466	LUC7L3	-0.460976	1	0.544859	0.650108	1.00583	0.197849		5.02059	4.34839	4.17737	4.04561	4.26085	4.17348	5.4152	5.07911	4.31455
AFP4	NA	1.0018	0.489594	1.76823	0.00040822	0.766426	0.198104		10.1181	9.63565	8.64685	10.3687	10.731	10.6281	11.0824	11.6241	11.2871
FZD8A	NA	0.94407	1	-0.442403	0.833765	-1.38647	0.198104		3.38794	4.00896	5.66476	5.67036	5.84661	4.96127	4.97472	4.01277	3.75902
SLC17A5	NA	0.109948	1	-1.33072	0.35244	-1.44067	0.198104		2.97836	3.87541	4.29106	4.2172	3.69199	3.83786	2.95278	2.87017	3.21712
ENSNFUG00015005526	ABCC2	-1.37726	1	0.0959083	0.972339	1.47317	0.198122		6.84866	3.94373	4.44638	4.2959	4.32649	4.67439	6.23085	5.55611	5.24472
APEX1	NA	-0.73292	1	-1.85815	0.0204026	-1.12523	0.199174		4.46669	5.05232	4.67302	4.13395	4.26085	4.0966	3.1683	3.68153	3.21712
ENSNFUG00015020979	RBM14B	-1.26193	1	0.484457	0.835007	1.74639	0.199191		3.84289	3.37931	2.63813	2.60541	2.73925	2.76742	4.24562	3.25084	3.21712
ENSNFUG00015018144	IGF2B	-0.528464	1	0.804702	0.606871	1.33317	0.200063		5.37558	4.58069	5.38643	4.44149	5.24457	4.17348	6.79808	5.65424	4.06336
GTF2F1	NA	-0.23813	1	0.765284	0.467268	1.00341	0.200635		4.46669	3.94373	3.6894	3.9515	3.69199	3.92936	4.65575	4.3616	4.87954
ENSNFUG00015014983	RNF128	0.784954	1	-0.119199	0.939085	-0.904153	0.200684		4.54872	4.8176	5.30756	5.54708	5.57677	5.79431	4.50538	4.28197	5.43346
ENSNFUG00015010247	CNPY1	0.0546051	1	-0.641624	0.358991	-0.696229	0.200684		8.02314	8.5363	8.05841	8.28853	8.34944	8.2009	7.21632	7.1718	8.16482
ENSNFUG00015011071	COX5A	-1.004	0.773599	-0.115672	0.939055	0.888333	0.201207		8.82714	7.22794	7.39167	7.01278	7.01053	7.03711	8.19064	7.67097	7.74761
ENSNFUG00015020918	ASS1	0.358334	1	-0.994418	0.521035	-1.35275	0.201207		3.55604	3.47476	3.77005	3.9515	3.78832	3.83786	2.69931	2.87017	3.37284
ENSNFUG00015014396	ARL4CB	-0.452566	1	0.258243	0.79222	0.710809	0.201534		5.18352	5.47799	5.28028	4.91029	4.71755	5.12505	5.37239	5.71614	5.56847
TCTA	NA	-0.38363	1	0.749008	0.557451	1.13264	0.201534		5.02059	3.27709	4.23533	3.85083	3.87862	4.24646	4.97472	4.82194	4.97986
NPC1L1	NA	-0.105354	1	-1.29569	0.23248	-1.19034	0.202729		4.46669	4.44584	3.6894	4.2959	4.04385	4.0966	3.1683	3.25084	3.51337
FBXL3A	NA	1.44967	1	-0.404034	0.899365	-1.8537	0.203003		2.71968	2.61712	3.41626	4.04561	3.47758	4.01541	2	2.35158	3.51337
ENSNFUG00015011529	HSP90AA1.2	-1.72209	1	-4.08238	0.0174621	-2.36029	0.203088		2.71968	7.12135	4.17737	5.33981	3.47758	2.76742	2.69931	2.87017	2.8439
ENSNFUG00015013116	ZNF706	-1.13683	0.284458	-0.343213	0.735748	0.79362	0.203392		6.01794	5.65144	5.28028	4.69484	4.76568	4.50626	5.61202	5.33723	5.07365
ENSNFUG00015012361	PPIP5K1	-1.7188	0.911925	-0.0288562	0.990902	1.68994	0.203392		4.08205	3.04797	3.31237	2.83359	2.53227	2.55399	3.67042	3.55175	3.21712
FCF1	NA	-0.912116	1	0.666885	0.733655	1.579	0.203392		2.97836	3.87541	2.80053	3.03057	2.92022	2.55399	4.04218	3.68153	3.51337
ENSNFUG00015010727	TMEM115	0.353617	1	-1.06059	0.508183	-1.41421	0.203392		2.71968	4.29708	3.6894	4.04561	3.9636	4.01541	3.1683	3.07302	3.04255
ENSNFUG00015006126	BMP2B	-0.183193	1	0.955225	0.409155	1.13842	0.203392		3.84289	3.37931	3.41626	3.35853	3.22565	3.63536	4.24562	4.01277	4.38941
NDRG2	NA	0.0462742	1	-0.919781	0.333573	-0.966055	0.203392		4.37971	4.74287	5.33433	4.69484	5.06391	5.00399	4.24562	3.68153	4.38941
ENSNFUG00015022885	DNAJC17	-0.669302	1	0.698989	0.661697	1.36829	0.205187		3.55604	3.37931	3.07903	3.03057	2.92022	2.9533	3.92858	3.91058	3.51337
ENSNFUG00015006759	SHROOM2	-0.914212	1	0.51091	0.788629	1.42512	0.205376		4.54872	2.91815	3.51316	3.20385	2.92022	3.39972	4.3375	4.28197	3.75902
ENSNFUG00015001014	EIF2B2	-0.587609	1	0.423281	0.755069	1.01089	0.205428		4.37971	4.53712	3.91897	3.62558	4.04385	3.83786	5.03085	4.57707	4.23558
ENSNFUG00015013911	HABP2	0.987226	0.164142	0.366211	0.630306	-0.621015	0.205711		10.6418	11.255	11.1962	11.9238	11.9575	12.2268	11.0428	11.2324	11.8598
ENSNFUG00015000572	ATL2	0.414089	1	-0.627456	0.626203	-1.04154	0.205711		3.96742	4.24388	4.54135	4.63555	4.56273	4.67439	3.1683	3.68153	4.31455
ENSNFUG00015000155	SALL1A	-0.883151	1	0.734635	0.731094	1.61779	0.205915		4.54872	2.91815	5.04124	3.35853	4.38928	3.11794	5.84902	4.7645	3.75902
ELOF1	NA	0.356229	1	-0.660613	0.583362	-1.01684	0.205915		4.96192	6.17648	6.55076	6.37946	6.3824	6.40124	4.58252	5.21394	6.10122
ENSNFUG00015018398	CAMKK2	-0.509634	1	0.915696	0.575626	1.42533	0.206263		5.07697	3.16708	3.20041	3.74259	3.69199	3.63536	5.32828	4.70469	4.15204
LARS1	NA	-0.0407299	1	-1.45581	0.281708	-1.41508	0.206263		2.97836	3.94373	4.44638	3.85083	3.9636	3.92936	3.1683	2.87017	3.04255
ARFGAP3	NA	0.939768	1	-0.367735	0.857094	-1.3075	0.206514		3.55604	3.37931	3.20041	4.2172	3.69199	4.0966	3.35577	2.63405	3.37284
RORCB	NA	0.387624	1	-0.950188	0.546848	-1.33781	0.206514		3.19764	3.64858	3.77005	3.74259	3.87862	3.92936	2.95278	2.87017	3.21712
ENSNFUG00015005004	PGM3	-0.054432	1	-1.06607	0.262476	-1.01164	0.206647		4.37971	4.58069	4.58659	4.44149	4.81224	4.0966	3.92858	3.68153	3.51337
ENSNFUG00015019454	CTSS	2.07403	0.064819	0.956226	0.481109	-1.11781	0.206765		2.97836	3.37931	3.6894	4.95947	5.40509	4.44556	3.80526	4.64229	3.51337
ENSNFUG00015017170	KPNA2	-0.288045	1	-1.66785	0.155805	-1.3798	0.206765		3.84289	4.39794	3.60397	3.62558	3.87862	3.83786	2.95278	2.87017	3.04255
ENSNFUG00015000011	ND2	-1.64029	0.492779	-0.400817	0.832657	1.23947	0.207175		11.8663	9.19352	9.31784	8.93651	9.14749	9.07814	10.668	10.3888	9.6226
LMBRD1	NA	0.995046	1	-0.22433	0.914859	-1.21938	0.207467		2.71968	3.72822	3.98804	4.37053	4.32649	4.3822	3.1683	3.25084	3.86776
PTGES3B	NA	0.140477	1	-1.09763	0.395509	-1.2381	0.207676		3.19764	5.25414	4.71437	4.85937	4.85736	4.56451	3.80526	4.10819	3.37284
ENSNFUG00015020411	ACY1	-0.106253	1	-0.915476	0.217264	-0.809223	0.207676		5.54504	6.61399	6.12959	6.05679	6.33534	5.76976	5.13695	5.68552	5.07365
ENSNFUG00015011410	MRPL2	-0.346599	1	0.429458	0.65046	0.776057	0.207824		5.37558	4.704	4.71437	4.63555	4.66777	4.62049	5.37239	5.33723	5.24472
JKAMP	NA	-0.273729	1	0.501747	0.575626	0.775476	0.208485		4.77006	4.98906	4.94029	4.63555	4.76568	4.62049	5.61202	5.48678	4.87954
FAM32A	NA	-0.447778	1	0.302313	0.768494	0.750091	0.208765		5.28274	4.88864	5.10482	4.95947	4.71755	4.3822	5.45677	5.25622	5.3609
ERG28	NA	-1.22774	0.88031	-2.36603	0.00226924	-1.13829	0.208915		7.6669	7.78379	8.88049	7.42538	7.14396	6.24972	5.4152	4.82194	6.80872
ENSNFUG00015005352	YTH2	0.0660855	1	-1.11558	0.351061	-1.18167	0.208915		3.38794	4.95636	4.54135	4.37053	4.71755	4.44556	3.92858	3.25084	3.64142
SRPK1B	NA	-0.517285	1	0.534238	0.676467	1.05152	0.209142		4.08205	3.64858	3.98804	3.74259	3.47758	3.39972	4.3375	4.43705	4.15204
SPARC	NA	-0.441385	1	-1.27778	0.0515299	-0.83639	0.209142		6.79924	5.91237	6.27487	6.30531	5.84661	5.613	4.58252	5.25622	5.53588
SF3B1	NA	-0.759427	1	0.397158	0.811947	1.15658	0.20916		6.41784	4.62297	4.34471	4.69484	4.76568	4.77649	5.91015	6.01594	5.3232
ENSNFUG00015004576	TMEM176	0.919401	0.376499	0.264612	0.782026	-0.654789	0.20953		5.5045	6.07351	5.91582	6.58148	6.82993	6.77874	5.91015	5.80427	6.50635
ENSNFUG00015002159	COX4I1	-0.560996	1	0.116414	0.917297	0.67741	0.210108		10.3272	9.32101	9.22612	9.07406	9.21403	9.17713	10.0336	9.78751	9.64186
SI:CH211-51H9.6	NA	-1.0536	1	0.070621	0.972985	1.12422	0.21146		5.07697	4.24388	3.84643	3.74259	3.78832	3.39972	4.85546	4.43705	4.15204
ENSNFUG00015022262	DNAJB11	-0.269159	1	-1.27594	0.142671	-1.00678	0.212224		5.32991	7.22794	7.03979	6.54972	6.78394	6.06029	5.28277	5.25622	5.98532
C18H3ORF33	NA	-0.948501	1	0.630592	0.755069	1.57909	0.212827		3.84289	2.91815	2.94649	2.83359	2.73925	2.76742	3.1683	3.68153	3.96887
ENSNFUG00015019286	SPON1B	0.250367	1	-0.735878	0.522125	-0.986245	0.212827		4.18824	4.18864	4.34471	4.50912	4.44944	4.3822	3.35577	3.68153	3.96887
TRIAP1	NA	-0.172604	1	-1.92274	0.239967	-1.75014	0.212827		2.97836	4.07137	3.60397	3.49822	3.9636	2.9533	2.39162	2.87017	2.61347
ENSNFUG00015020327	NUCB2A	-0.136288	1	-1.33762	0.231216	-1.20134	0.212827		3.38794	4.704	4.94029	4.57372	4.44944	4.17348	3.1683	3.68153	3.64142
ENSNFUG00015006875	ABHD4	0.119634	1	0.667909	0.171759	0.548275	0.212827		7.10061	6.88117	6.39417	6.86574	6.8745	7.03711	7.51086	7.42445	7.44822
ENSNFUG00015022516	Nfu_g_1_002795	0.0896828	1	-1.20662	0.365338	-1.29631	0.212882		3.38794	4.44584	3.6894	4.04561	3.9636	4.01541	3.35577	2.87017	3.21712
RASGEF1BB	NA	-1.71995	1	0.132498	0.970483	1.85245	0.213625		5.89788	2.77547	3.20041	3.03057	3.47758	3.52235	5.08488	5.07911	3.64142
ENSNFUG00015006612	GPR89B	0.0324239	1	-1.52402	0.331613	-1.55645	0.214691		2.71968	3.94373	3.91897	3.85083	3.78832	3.39972	2.95278	2.87017	2.61347
ENSNFUG00015006819	SPATA13	-0.53161	1	0.540244	0.688026	1.07185	0.21522		4.46669	4.29708	3.60397	3.49822	3.58877	4.0966	4.42388	4.98167	4.23558
GSTT1A	NA	0.587914	1	-0.0251599	0.983266	-0.613074	0.215379		9.69582	10.1824	9.92477	10.5157	10.4509	10.6315	9.58861	9.568	10.4346
ENSNFUG00015005399	GRAMD3	0.80776	1	-0.510321	0.799342	-1.31808	0.215379		3.19764	3.72822	3.31237	4.13395	3.87862	4.01541	2.95278	2.63405	3.64142
ENSNFUG00015004055	CTNNB1	0.23084	1	-0.52539	0.558645	-0.75623	0.215379		4.77006	5.40716	5.07338	5.41226	5.40509	5.16325	4.58252	4.70469	4.71464
TTPA	NA	-1.11879	1	0.140719	0.949372	1.25951	0.216437		5.89788	3.80369	4.11698	3.9515	3.78832	4.17348	5.28277	4.87717	4.82664
ENSNFUG00015021570	Nfu_g_1_017025	-0.131965	1	0.506302	0.467335	0.638267	0.216437		5.13123	5.35794	5.19522	5.09769	5.175	5.08582	5.71839	5.68552	5.69192
ZGC:194887	NA	0.0369571	1	-1.22399	0.337031	-1.26095	0.216437		4.18824	4.95636	4.71437	4.7518	4.66777	4.67439	2	4.10819	4.15204
ENSNFUG00015010290	SLC39A8	-0.133764	1	-1.17265	0.230374	-1.03888	0.21646		4.46669	5.80626	6.68161	5.64052	5.95435	5.79431	4.79191	4.93036	4.87954
ENSNFUG00015023668	ATP5D	-0.805556	0.943073	-0.0276518	0.985071	0.777904	0.217875		8.79808	7.68247	7.46619	7.21871	7.37092	7.34192	8.42337	7.95389	7.76879
ENSNFUG00015024131	IDH3B	-0.0730069	1	-1.47938	0.281591	-1.40637	0.218013		3.19764	5.02103	4.79367	4.2959	4.85736	4.24646	2.39162	3.80059	3.75902
ENSNFUG00015016136	NCL	0.196126	1	-0.906839	0.45983	-1.10297	0.218904		3.70658	5.35794	5.30756	5.183	5.06391	5.23674	3.52165	4.1977	4.71464
ENSNFUG00015005600	OLA.5773	-0.023687	1	0.484451	0.352197	0.508138	0.218904		6.32777	6.16221	6.38139	6.28616	6.23635	6.28479	6.83006	6.78095	6.6503
SLC35G1	NA	0.737865	1	-0.812526	0.705115	-1.55039	0.219212		2.40426	3.56429	3.31237	3.62558	3.69199	3.74016	2.95278	2.87017	2.61347
SRP54	NA	0.552729	1	-0.457052	0.755069	-1.00978	0.219464		4.08205	4.85356	5.07338	5.48124	5.175	5.00399	3.80526	3.91058	5.02752
ENSNFUG00015022666	PRKACB	0.990449	0.90193	0.048356	0.979454	-0.942093	0.219502		3.55604	4.1312	4.23533	4.91029	4.56273	5.00399	4.04218	3.68153	4.38941
MRPS14	NA	-0.763214	1	0.02157	0.987908	0.784784	0.219502		5.98885	5.33268	5.22413	4.7518	5.06391	4.72634	5.91015	5.29729	5.39763
RBM4.3	NA	-0.878836	1	0.192146	0.911214	1.07098	0.219502		4.54872	4.78072	4.44638	3.62558	4.19208	3.83786	5.32828	4.82194	3.75902
ENSNFUG00015007397	CCDC86	-0.351202	1	0.294177	0.745787	0.645379	0.219502		6.25632	6.29891	5.93343	6.01087	5.77788	5.71938	6.8458	6.30489	6.10122
ENSNFUG00015008756	BCL7B	-0.724168	1	0.584937	0.727922	1.30911	0.219502		3.55604	3.80369	3.07903	3.20385	2.92022	3.11794	4.24562	3.91058	3.51337
ENSNFUG00015014149	SLC5A6	-0.723921	1	0.653696	0.706899	1.37762	0.219502		4.08205	2.91815	3.41626	3.03057	2.92022	3.2657	3.67042	3.68153	4.38941
ZGC:110843	NA	-0.145158	1	0.462906	0.504384	0.608065	0.219502		5.92884	6.28581	5.66476	5.86362	5.91221	5.76976	6.53247	6.49344	6.22903
LONP1	NA	0.129919	1	-1.04099	0.409155	-1.17091	0.219502		3.55604	4.00896	4.49464	4.2959	4.11987	4.17348	3.1683	3.07302	3.75902
ENSNFUG00015020994	HERPUD1	0.0963669	1	-1.10449	0.38192	-1.20086	0.219502		3.70658	5.50085	4.44638	4.91029	5.0249	4.56451	3.1683	4.1977	4.06336
MRPL28	NA	-0.0142521	1	-0.862551	0.310651	-0.848298	0.219502		4.69999	5.75014	5.48529	5.41226	5.54954	5.16325	4.42388	4.43705	4.97986
SETD3	NA	-0.168214	1	-1.20732	0.211256	-1.0391	0.219502		4.69999	5.76909	6.60673	6.07922	5.6555	5.4371	4.24562	5.07911	4.97986
DIABLOA	NA	-1.15897	1	1.27953	0.693984	2.43849	0.220456		11.4001	4.53712	9.04552	7.80759	8.48856	9.78196	11.686	11.5108	10.7039
MRPL47	NA	-0.143191	1	-1.19398	0.226403	-1.05079	0.220456		3.96742	4.88864	5.00837	4.37053	4.9011	4.44556	3.35577	4.10819	3.75902
ENSNFUG00015009144	RAB5AB	0.174297	1	-1.20398	0.421583	-1.37828	0.221815		2.97836	4.29708	3.60397	3.9515	3.87862	3.83786	3.1683	2.87017	3.04255
ENSNFUG00015017300	STX6	-0.70371	1	0.460314	0.771201	1.16402	0.221884		4.28715	3.37931	3.6894	3.49822	3.08101	3.39972	4.24562	3.91058	4.23558
RPL30	NA	-0.466578	1	0.353837	0.763847	0.820415	0.221884		10.6787	9.01251	9.60845	9.49687	9.6326	9.25214	10.6287	10.1878	9.96005
GPC4	NA	0.473983	1	-0.761005	0.631654	-1.23499	0.221884		3.38794	4.24388	3.41626	4.04561	4.19208	4.0966	3.35577	2.87017	3.51337
ENSNFUG00015020744	CSE1L	0.413234	1	-0.759055	0.606338	-1.17229	0.221884		3.55604	3.64858	3.98804	3.9515	4.19208	4.01541	2.95278	3.25084	3.51337
SLC25A55A	NA	-0.442722	1	1.05429	0.545697	1.49701	0.221884		2.97836	4.58069	2.80053	3.62558	2.92022	3.63536	4.65575	4.93036	3.75902
ENSNFUG00015011970	C11H6ORF120	-0.336704	1	-1.92956	0.180272	-1.59285	0.221884		2.71968	5.08293	4.11698	4.2172	4.26085	3.52235	2.69931	3.25084	3.04255
SNRPA1	NA	-0.203797	1	-1.09665	0.17005	-0.892853	0.221884		4.62633	5.43116	5.16571	4.91029	5.1019	4.82495	4.65575	4.01277	3.86776
ENTPD7	NA	-0.543256	1	-1.93535	0.0914284	-1.3921	0.221884		3.38794	4.18864	4.67302	4.04561	3.78832	3.52235	2.95278	3.07302	2.8439
ACSL1A	NA	-1.54349	1	-3.70704	0.0206756	-2.16354	0.221884		2.97836	4.53712	4.63045	3.49822	3.22565	2.76742	2.69931	2	2.3391
ENSNFUG00015020834	CRIP2	0.466274	1	1.51146	0.0925677	1.04519	0.223294		4.54872	4.07137	3.77005	4.63555	4.04385	4.77649	4.42388	5.29729	6.07877
ENSNFUG00015022094	SGCB	0.790453	1	-0.118941	0.943147	-0.909394	0.223853		3.84289	4.704	4.94029	5.22383	5.2102	5.40558	3.92858	4.43705	4.93057
ENSNFUG00015004262	ERLEC1	0.0449228	1	-1.2925	0.35244	-1.33742	0.223853		2.71968	5.33268	5.00837	4.91029	4.76568	4.67439	3.35577	3.91058	3.86776
ENSNFUG00015001437	ERGIC1	-0.151418	1	-1.18562	0.224332	-1.03421	0.223853		3.96742	5.14229	4.83175	4.7518	4.71755	4.3822	3.35577	4.10819	3.86776
ENSNFUG00015013647	LONRF1 ENSNFUG00015013647	1.26457	0.926598	0.0602637	0.980339	-1.2043	0.224242		4.46669	2.61712	4.11698	5.09769	4.5072	5.04549	3.80526	3.91058	4.06336
ENSNFUG00015003668	STXBP2	0.41532	1	-0.924451	0.575626	-1.33977	0.224242		2.97836	3.94373	3.51316	3.85083	3.9636	3.74016	2.95278	2.87017	3.21712
ENSNFUG00015011631	MRPL10	-0.640295	1	0.130601	0.917411	0.770896	0.224989		5.69668	5.11292	4.90501	4.63555	4.5072	4.91725	5.4152	5.48678	5.20382
NDUFS7	NA	-0.580215	1	0.0506597	0.967867	0.630875	0.225365		8.17293	7.22107	7.27215	7.02439	7.02048	7.10737	7.64279	7.76914	7.58192
CEP43	NA	-0.322117	1	1.05794	0.481949	1.38006	0.225365		3.55604	2.91815	2.94649	2.83359	2.92022	3.11794	4.04218	3.91058	3.37284
ENSNFUG00015007629	SC5DL	-0.71338	1	-1.8411	0.0385093	-1.12772	0.225731		4.54872	5.56732	6.4194	5.30218	5.24457	4.56451	4.24562	3.55175	4.46059
ENSNFUG00015021669	DDX23	-0.329491	1	0.571133	0.595505	0.900624	0.225825		4.62633	3.87541	4.17737	3.85083	4.04385	4.01541	4.72543	4.64229	4.71464
ENSNFUG00015022439	SNAPIN	-1.4071	1	0.0299375	0.990902	1.43703	0.226057		4.69999	2.77547	3.98804	3.03057	3.08101	3.11794	3.92858	3.91058	4.15204
CETP	NA	0.947883	1	-0.127336	0.949372	-1.07522	0.226134		4.90076	5.979	6.45643	6.65797	6.97002	6.82713	4.65575	5.33723	6.66544
ENSNFUG00015004156	SLC16A2	0.763384	0.938063	0.0335689	0.982749	-0.729815	0.227994		5.02059	4.62297	4.86885	5.51454	5.49348	5.52773	4.65575	4.57707	5.24472
GABARAPL2	NA	-0.277824	1	0.693038	0.552216	0.970862	0.228343		5.98885	4.24388	4.83175	5.05307	4.56273	5.12505	5.84902	5.55611	5.98532
ISY1	NA	-0.701605	1	0.392977	0.805308	1.09458	0.229016		4.18824	5.14229	3.91897	3.9515	3.9636	4.01541	5.45677	4.64229	4.23558
ENSNFUG00015008176	ARCN1	0.175386	1	-0.824269	0.467566	-0.999656	0.229016		4.08205	5.92932	5.16571	5.44716	5.62973	5.16325	4.42388	4.3616	4.82664
ENSNFUG00015022633	TBC1D22B	-0.217697	1	1.09199	0.439335	1.30969	0.229016		3.55604	3.27709	2.94649	3.20385	3.08101	3.11794	4.24562	4.28197	3.21712
PGAP2	NA	-0.192208	1	-1.14799	0.194261	-0.955783	0.229016		4.18824	5.40716	4.90501	4.69484	4.9848	4.62049	4.04218	3.91058	4.06336
ENSNFUG00015002038	MCM7	0.0775741	1	-1.46212	0.371073	-1.5397	0.229399		2.97836	3.87541	3.77005	3.35853	4.11987	3.39972	2.95278	2.35158	3.04255
CAP1	NA	-0.87555	1	0.259572	0.884858	1.13512	0.2298		5.13123	4.07137	3.98804	3.74259	3.78832	3.83786	5.23579	4.64229	3.86776
ENSNFUG00015000864	NDUFA4	-0.31196	1	0.299659	0.727258	0.611618	0.2298		8.9754	7.97141	8.23572	8.104	8.22156	8.11093	8.97795	8.62885	8.61827
ENSNFUG00015022604	Nfu_g_1_010045	1.0391	0.376007	0.326943	0.762927	-0.71216	0.229941		4.83689	4.62297	5.04124	6.12305	5.40509	5.71938	5.23579	4.98167	5.16172
ENSNFUG00015023392	RNPC3	-1.1371	1	0.168339	0.939085	1.30544	0.229941		5.23399	3.27709	3.84643	3.20385	3.69199	3.52235	4.72543	4.3616	4.23558
SRSF5A	NA	0.201406	1	-0.567718	0.54397	-0.769125	0.229941		5.18352	6.35015	5.98503	6.16559	6.33534	5.81845	5.08488	5.48678	5.60034
DIO3	NA	0.9095	1	2.7484	0.0949897	1.8389	0.229941		2.40426	2	3.51316	3.03057	3.78832	2.76742	5.03085	4.98167	3.04255
VTNB	NA	0.42146	1	-0.462724	0.701663	-0.884185	0.22996		8.73378	9.29182	9.785	9.71305	9.8781	9.6587	7.92786	8.40285	9.68894
SGPL1	NA	0.602978	1	-0.857287	0.664474	-1.46027	0.22996		2.97836	3.27709	3.60397	3.74259	3.78832	3.63536	2.39162	2.63405	3.37284
FH	NA	0.0505221	1	-0.674078	0.389158	-0.7246	0.22996		5.02059	5.71147	5.41179	5.51454	5.52178	5.37336	4.72543	4.64229	5.07365
ENSNFUG00015025365	ELAVL1	0.0686417	1	-1.05775	0.381448	-1.12639	0.22996		3.55604	4.98906	4.90501	4.44149	5.1019	4.44556	3.52165	3.55175	4.23558
DDX56	NA	0.0532027	1	-1.60949	0.360131	-1.66269	0.22996		2.71968	3.94373	3.6894	3.49822	3.87862	3.39972	2	2.87017	3.04255
ENSNFUG00015011560	SOD2	0.527498	1	-0.117399	0.916415	-0.644896	0.23104		6.50261	6.98209	7.0479	7.38095	7.46136	7.29968	6.34594	6.47566	7.26154
RBM45	NA	0.533236	1	-0.763609	0.663566	-1.29685	0.231252		2.71968	4.1312	3.77005	4.04561	4.19208	4.01541	3.1683	3.55175	2.8439
TSPAN15	NA	0.657972	1	-0.868577	0.680966	-1.52655	0.23217		2.71968	3.04797	3.6894	3.74259	3.58877	3.63536	2.39162	2.87017	3.04255
KRT5	NA	0.709769	0.688806	0.136861	0.889091	-0.572909	0.232677		5.98885	6.24577	5.93343	6.87858	6.64933	6.68995	5.9688	6.01594	6.52307
MGRN1B	NA	1.06603	1	-0.381541	0.878547	-1.44757	0.232771		2.71968	3.16708	3.20041	3.62558	3.35711	4.0966	2.69931	3.07302	2.8439
ENSNFUG00015000626	SLC29A1	0.719633	1	-0.404198	0.824723	-1.12383	0.232771		3.38794	3.64858	3.91897	4.2172	4.11987	4.31592	2.95278	3.25084	3.86776
ENSNFUG00015007187	ALDH3A2B	0.237635	1	-0.710072	0.538973	-0.947707	0.233319		4.83689	6.36269	6.71255	6.39742	6.57025	6.23186	4.91632	5.52186	5.93623
HSPA5	NA	-1.59038	1	-4.65453	0.0695059	-3.06416	0.233319		2.71968	8.01573	4.23533	5.22383	5.37439	4.56451	3.67042	2.63405	2
ENSNFUG00015017013	CCDC124	-0.469889	1	0.301797	0.788629	0.771686	0.233373		5.28274	4.66405	4.63045	4.50912	4.38928	4.50626	5.13695	5.21394	5.02752
ENSNFUG00015003273	AL928657.1	-0.719287	1	0.158938	0.916415	0.878225	0.233512		10.3758	8.76829	8.78669	8.79126	8.97912	8.62706	10.1299	9.41077	9.3618
ENSNFUG00015008911	MIF	-0.640637	1	0.0560404	0.96807	0.696677	0.233764		7.36116	6.45921	6.52775	6.24707	6.21918	6.19546	7.29864	6.61215	6.6503
ENSNFUG00015001471	CISD2	-0.0111841	1	-1.43494	0.332211	-1.42375	0.233764		2.97836	4.53712	3.77005	4.2172	4.04385	3.39972	3.1683	3.07302	2.8439
AMY2AL2	NA	1.94871	9.81906e-05	1.24975	0.0243296	-0.69896	0.233887		8.2049	8.051	8.00108	10.6603	9.23341	9.80781	9.13984	9.34373	9.47141
NME4	NA	2.23599	0.0108894	1.21079	0.230374	-1.02519	0.233887		5.73222	6.80975	6.93874	8.64108	8.62851	9.02985	6.71486	6.94503	8.73052
ENSNFUG00015020323	BASP1	1.12155	1	-0.0560295	0.982749	-1.17758	0.233887		2.97836	3.72822	3.31237	4.2172	4.11987	4.24646	2.69931	3.55175	3.64142
IAH1	NA	-0.963185	1	0.194992	0.915508	1.15818	0.233887		4.18824	3.64858	3.77005	3.35853	3.22565	3.11794	3.92858	4.3616	3.64142
ENSNFUG00015003295	HNRNPH3	0.476868	1	-0.617713	0.681338	-1.09458	0.233887		3.38794	4.53712	4.11698	4.37053	4.66777	4.44556	3.80526	4.01277	3.04255
ENSNFUG00015020274	ZNF622	0.398733	1	-0.703341	0.625055	-1.10207	0.233887		3.55604	4.00896	4.05395	4.04561	4.26085	4.31592	3.52165	2.87017	3.75902
CYP27B1	NA	0.506859	1	-1.40025	0.552216	-1.90711	0.233887		2.71968	4.1312	4.39644	3.74259	5.34301	2.55399	3.52165	3.07302	2.3391
VTI1A	NA	-0.380113	1	0.91678	0.54397	1.29689	0.233887		3.19764	2.91815	3.51316	3.03057	2.73925	3.2657	3.80526	3.80059	3.86776
G3BP2A	NA	0.13906	1	-0.812015	0.452695	-0.951074	0.233887		4.28715	5.84251	4.86885	5.26353	5.49348	5.08582	4.58252	4.57707	4.23558
TTC7A	NA	-0.198801	1	1.26376	0.425945	1.46257	0.233887		3.96742	2.77547	2.63813	3.20385	2.92022	3.11794	4.50538	4.01277	3.37284
ENSNFUG00015017855	NSA2	0.426516	1	0.83887	0.00683561	0.412354	0.233887		7.70317	7.66739	7.79006	8.24456	8.04758	8.12551	8.38081	8.55879	8.68666
ENSNFUG00015023349	ATP5G3A	-0.298511	1	0.237884	0.763058	0.536395	0.234185		11.3694	10.6747	10.5358	10.5279	10.7325	10.559	11.2298	11.0363	11.1612
ENSNFUG00015009426	Nfu_g_1_017124	0.392751	1	-0.776481	0.604166	-1.16923	0.234185		3.38794	4.29708	3.60397	4.04561	4.32649	4.01541	3.35577	3.55175	3.04255
ENSNFUG00015001090	MECR	-0.888767	1	0.237329	0.896836	1.1261	0.234311		5.13123	3.64858	3.98804	3.74259	3.58877	3.74016	4.85546	4.57707	4.15204
SLKA	NA	-0.0444593	1	1.18601	0.361983	1.23047	0.234311		3.70658	3.16708	3.07903	3.35853	3.08101	3.39972	4.65575	4.01277	3.51337
YTHDC1	NA	-1.23009	1	0.214649	0.925716	1.44473	0.234798		4.54872	3.27709	3.20041	2.83359	3.22565	2.9533	4.42388	3.80059	3.37284
ENSNFUG00015012891	NDUFA5	-0.719388	1	0.0102169	0.99303	0.729605	0.235136		7.70317	6.62443	6.61767	6.22713	6.54289	6.33585	7.32132	7.12693	6.72447
SRPRB	NA	-0.16775	1	-1.32798	0.244126	-1.16023	0.235136		4.18824	6.13325	4.63045	5.183	5.43516	4.56451	4.14748	4.3616	3.86776
CCDC47	NA	0.370312	1	-0.403997	0.711435	-0.774308	0.235349		5.07697	5.73093	5.70634	5.88923	5.80115	5.97697	4.72543	4.82194	5.7499
ENSNFUG00015020297	GFM1	-0.360261	1	-1.93136	0.190092	-1.5711	0.235349		2.97836	5.69173	4.11698	4.50912	4.66777	3.92936	3.80526	2.63405	3.21712
ENSNFUG00015021268	Nfu_g_1_002581	0.921537	0.88042	0.116694	0.936693	-0.804843	0.235703		5.28274	5.40716	5.60005	6.32421	6.6621	5.76976	5.45677	6.08794	4.82664
ENSNFUG00015007839	BNIP4	-0.155393	1	0.956399	0.446864	1.11179	0.236289		6.67689	4.39794	4.86885	5.41226	5.13891	5.86554	6.20668	6.38329	6.93904
HADHB	NA	-0.215378	1	-0.814805	0.126743	-0.599427	0.236633		6.35082	6.83695	6.81114	6.39742	6.58373	6.46379	5.61202	5.80427	6.24927
ENSNFUG00015001984	TRAPPC6BL	-0.0234565	1	-1.50358	0.332211	-1.48012	0.23676		2.71968	4.39794	3.91897	3.9515	4.11987	3.39972	2.69931	3.25084	2.8439
ENSNFUG00015022975	NDUFA13	-0.744302	0.798953	-0.117233	0.914012	0.627068	0.237263		8.00146	7.03002	7.12659	6.78618	6.77221	6.60924	7.36565	7.36772	7.26154
ENSNFUG00015008514	TOB1	0.244342	1	1.04184	0.155805	0.797494	0.237858		6.46085	5.14229	5.96804	6.16559	5.70571	6.52374	6.73189	7.2986	6.68043
ENSNFUG00015022185	DHTKD1	0.931605	0.784145	0.148505	0.91706	-0.783101	0.237875		4.28715	4.58069	4.49464	5.26353	5.13891	5.40558	4.14748	4.43705	5.02752
POLR3C	NA	-0.631503	1	0.67704	0.682885	1.30854	0.237998		3.70658	3.04797	3.20041	3.03057	2.92022	2.9533	3.80526	3.91058	3.51337
ENSNFUG00015010505	MBOAT2A ENSNFUG00015010505	1.20531	1	-0.173094	0.949372	-1.3784	0.238185		2.40426	3.87541	3.60397	4.44149	4.32649	4.24646	2.39162	3.25084	3.96887
PLA2G7	NA	0.742652	1	-0.424579	0.823832	-1.16723	0.239148		3.70658	3.80369	4.23533	4.44149	4.26085	4.82495	2.95278	3.07302	4.38941
ENSNFUG00015003866	TMEM42	-0.547866	1	0.280238	0.824946	0.828104	0.239694		5.18352	4.66405	4.34471	4.37053	4.11987	4.3822	5.23579	4.82194	4.87954
ENSNFUG00015001197	PRPF8	0.91995	1	-0.217226	0.91706	-1.13718	0.239772		2.97836	3.47476	3.84643	4.2172	4.19208	4.0966	2.95278	3.55175	3.51337
ENSNFUG00015015353	RPAP3	0.638082	1	-0.756774	0.706429	-1.39486	0.239827		2.71968	3.47476	3.41626	3.62558	3.69199	3.74016	2.69931	2.87017	3.04255
ENSNFUG00015019120	KLF9	-1.29354	1	1.59069	0.686931	2.88424	0.239936		5.54504	2	6.85802	4.13395	5.46462	3.74016	8.34805	6.83774	5.24472
RPL4	NA	0.0187961	1	0.405614	0.317394	0.386818	0.239936		8.92253	8.57451	8.81548	8.84132	8.75608	8.78544	9.17451	9.14428	9.21515
GUSB	NA	0.270982	1	-0.673577	0.570996	-0.94456	0.240106		4.18824	4.07137	4.44638	4.44149	4.56273	4.3822	3.67042	3.40912	4.06336
ANAPC13	NA	-0.37272	1	0.524783	0.650108	0.897503	0.240119		4.08205	4.24388	4.49464	4.13395	4.19208	3.63536	5.08488	4.64229	4.38941
ENSNFUG00015009341	TPST1L	-0.137937	1	-1.19257	0.253118	-1.05464	0.240119		3.70658	4.78072	4.44638	4.50912	4.19208	4.17348	3.52165	3.40912	3.64142
ENSNFUG00015017611	ATP10D	-0.600853	1	0.557936	0.717852	1.15879	0.240139		3.84289	3.47476	3.6894	3.20385	3.22565	3.39972	3.67042	4.57707	3.75902
ENSNFUG00015011221	TXNDC12	0.209722	1	-0.907412	0.495686	-1.11713	0.240139		3.55604	4.07137	4.05395	4.2172	4.04385	4.01541	3.35577	2.87017	3.64142
ENSNFUG00015025135	Nfu_g_1_022524	-0.138186	1	-1.64726	0.283071	-1.50907	0.240139		2.71968	4.1312	3.91897	3.74259	3.78832	3.39972	2.69931	3.07302	2.61347
ENSNFUG00015017726	MCCC1	0.471499	1	1.34295	0.08151	0.871447	0.240139		4.62633	3.72822	3.6894	4.37053	4.32649	4.50626	5.13695	5.45082	4.77173
ENSNFUG00015017174	ATPIF1A	-0.693032	1	0.103788	0.943147	0.79682	0.240153		6.65854	5.40716	5.4612	5.33981	5.34301	5.23674	6.23085	5.91398	5.96098
ENSNFUG00015008329	C10H12ORF44	-0.16726	1	0.425995	0.557451	0.593255	0.240153		5.5045	5.5455	5.62194	5.41226	5.31094	5.49815	5.99725	5.68552	6.14509
ENSNFUG00015025140	CHMP6	0.137888	1	-0.893149	0.452265	-1.03104	0.240614		3.70658	5.22698	5.19522	4.91029	5.13891	4.96127	3.80526	3.80059	4.65519
ENSNFUG00015015216	MAGT1	-0.288607	1	-1.17424	0.146282	-0.885628	0.24155		5.07697	6.19061	6.15984	5.75637	5.70571	5.4371	4.14748	4.70469	5.39763
BCL6AB	NA	-1.10306	1	0.391176	0.85833	1.49423	0.243067		4.37971	3.04797	2.80053	2.83359	2.73925	3.11794	3.92858	3.68153	3.75902
ENSNFUG00015005617	C19ORF24	-0.18784	1	0.447717	0.569786	0.635557	0.243067		5.02059	5.75014	5.57782	5.37649	5.27813	5.3404	5.9688	6.01594	5.7499
ASH2L	NA	0.228562	1	-1.3226	0.467268	-1.55116	0.243067		2.40426	4.00896	3.60397	3.49822	3.87862	3.63536	2.69931	3.07302	2.61347
STX18	NA	-0.159466	1	-1.84216	0.286354	-1.68269	0.243067		2.71968	4.58069	3.20041	3.62558	3.87862	3.39972	2.95278	2.63405	2.61347
NUP54	NA	-0.120718	1	-1.20436	0.272274	-1.08364	0.243067		3.70658	4.704	4.54135	4.13395	4.32649	4.44556	3.1683	3.25084	3.96887
ENSNFUG00015020300	Nfu_g_1_016592	0.785104	1	-0.05935	0.973164	-0.844454	0.243313		3.84289	5.11292	5.07338	5.61004	5.62973	5.27213	4.50538	4.64229	5.07365
TMED8	NA	0.30777	1	-0.935167	0.550643	-1.24294	0.243313		2.97836	4.53712	4.17737	4.2959	4.38928	4.24646	2.69931	3.91058	3.37284
ENSNFUG00015013329	PHEX	0.652512	1	1.81605	0.0896703	1.16354	0.243466		3.84289	2.77547	2.63813	3.49822	3.47758	3.52235	4.65575	4.10819	4.23558
ENSNFUG00015010061	SNRPB	-1.33614	0.595171	-0.30906	0.839158	1.02708	0.243885		4.62633	4.58069	4.23533	3.35853	3.69199	3.39972	4.42388	4.50876	3.64142
ZC3H18	NA	-0.566019	1	0.752713	0.649411	1.31873	0.244045		3.70658	3.04797	3.07903	3.03057	2.92022	2.9533	4.04218	3.80059	3.37284
ACBD5A	NA	0.355452	1	1.30618	0.145039	0.950726	0.244101		4.18824	3.16708	3.60397	3.74259	3.78832	4.17348	4.58252	4.70469	4.71464
ENSNFUG00015007103	PDCD4A ENSNFUG00015007103	0.87304	0.797128	0.147148	0.911214	-0.725892	0.244752		5.02059	5.22698	5.38643	5.96344	5.95435	6.15811	5.23579	4.70469	5.8854
ENSNFUG00015011618	PNPO	0.555507	1	-0.742807	0.684269	-1.29831	0.244978		2.97836	4.34839	3.84643	4.2172	4.5072	4.0966	2.39162	3.91058	3.37284
JAK2A	NA	1.09859	1	-0.334186	0.899365	-1.43278	0.245249		3.84289	2.43922	3.51316	4.13395	3.47758	4.50626	2.95278	2.87017	3.51337
RPL29	NA	-0.223841	1	0.399533	0.626203	0.623374	0.245249		11.072	9.87097	10.3815	10.4146	10.346	10.1294	11.1329	10.8287	10.7833
ENSNFUG00015014798	NUPR1	0.0930431	1	1.16765	0.302794	1.0746	0.245249		10.8843	8.14831	8.87138	9.71663	9.65353	10.1896	10.6877	10.9004	11.2007
ENSNFUG00015010343	ID2 ENSNFUG00015010343	-1.1446	1	0.243457	0.915508	1.38806	0.245833		4.77006	3.16708	3.20041	3.20385	2.92022	3.2657	4.14748	4.28197	3.64142
ENSNFUG00015011663	TCP1 ENSNFUG00015011663	0.341646	1	-0.173777	0.839158	-0.515423	0.245833		6.04646	6.31189	6.45643	6.61257	6.51501	6.71588	6.02516	6.15652	6.18767
PYGMB	NA	0.238092	1	-0.751481	0.546848	-0.989573	0.245833		3.84289	5.02103	4.23533	4.69484	4.81224	4.50626	3.52165	4.1977	3.86776
GOPC	NA	0.210077	1	-0.817252	0.519619	-1.02733	0.245833		3.38794	4.44584	4.34471	4.2959	4.38928	4.31592	3.67042	3.55175	3.51337
ENSNFUG00015010216	RBM26	-0.0315124	1	1.05789	0.371377	1.08941	0.245833		4.18824	3.37931	3.31237	3.62558	3.47758	3.74016	4.79191	4.57707	3.75902
ENSNFUG00015005331	Nfu_g_1_001572	0.578055	1	-0.398875	0.797283	-0.97693	0.246346		3.38794	4.66405	4.79367	5.00703	4.76568	5.00399	3.80526	3.91058	4.52842
ENSNFUG00015016301	Nfu_g_1_014066	-0.177856	1	-0.838797	0.184196	-0.660941	0.246346		6.18116	6.77266	6.95608	6.56569	6.47215	6.49407	5.81746	5.41394	6.28892
ENSNFUG00015024590	PINX1	-0.720427	0.988025	-0.0342015	0.979454	0.686226	0.246941		5.32991	5.14229	5.10482	4.57372	4.66777	4.44556	5.13695	5.17038	5.16172
ENSNFUG00015024644	SPRY4	1.75842	0.376116	2.72198	0.000879566	0.963557	0.247053		3.19764	2.77547	2.94649	3.9515	3.69199	4.44556	4.85546	4.3616	5.20382
MLX	NA	0.0401561	1	-1.30832	0.381448	-1.34848	0.2481		3.38794	3.64858	3.77005	3.62558	3.58877	3.74016	2.39162	3.25084	2.8439
ENSNFUG00015000304	KIAA0141	-0.529102	1	0.553224	0.712499	1.08233	0.248604		4.37971	3.16708	4.79367	3.62558	3.78832	4.0966	4.50538	4.70469	4.87954
ENSNFUG00015024719	PANX2	0.0694974	1	-1.35234	0.398291	-1.42184	0.248747		2.71968	5.73093	4.11698	4.85937	4.94356	4.44556	3.67042	3.40912	3.86776
MAN1C1	NA	1.35768	0.425951	0.443622	0.765378	-0.91406	0.248801		3.38794	3.87541	3.77005	4.63555	4.81224	4.87184	4.14748	3.40912	4.38941
ENSNFUG00015006129	Nfu_g_1_014200	-0.702938	0.667932	-0.159195	0.854949	0.543743	0.249598		7.38369	7.57348	7.28593	6.86574	6.8745	6.43285	7.35469	7.49677	6.87535
ANXA4	NA	-0.308667	1	0.0907762	0.896836	0.399443	0.249598		8.23619	8.37863	8.23217	8.16817	7.8497	7.90656	8.38081	8.37913	8.3636
ENSNFUG00015001313	PEX5	0.89425	1	-0.45167	0.840224	-1.34592	0.249598		3.38794	4.18864	3.98804	4.44149	4.76568	4.62049	2.95278	2.35158	4.52842
TUBGCP4	NA	-0.360386	1	0.830601	0.570304	1.19099	0.249598		4.08205	2.91815	3.6894	3.20385	3.22565	3.63536	4.58252	3.68153	4.23558
PMP22B	NA	-0.194514	1	0.51453	0.557451	0.709044	0.249598		5.02059	4.62297	5.04124	4.80658	4.76568	4.62049	5.64836	5.29729	5.07365
ENSNFUG00015008091	MAO	0.223913	1	-0.492556	0.597585	-0.716468	0.250119		4.77006	5.17107	5.28028	5.30218	5.40509	5.20046	4.97472	4.3616	4.65519
ZGC:162025	NA	0.306306	1	1.07777	0.138074	0.771465	0.250225		4.18824	4.18864	3.84643	4.2959	4.26085	4.3822	4.85546	5.12546	4.87954
CLYBL	NA	0.842298	1	-0.25567	0.899464	-1.09797	0.250471		3.38794	4.1312	3.91897	4.50912	4.56273	4.50626	3.1683	3.07302	4.38941
SEC61B	NA	-0.844658	0.704447	-1.53831	0.00230053	-0.693652	0.250634		6.92743	7.18624	6.67115	6.24707	6.42797	5.613	5.03085	5.52186	5.80563
FLAD1	NA	-0.0740308	1	-1.12917	0.312277	-1.05514	0.250682		3.70658	4.39794	4.39644	4.2172	4.11987	4.17348	2.95278	3.68153	3.51337
EZRA	NA	0.543551	1	-0.366205	0.801	-0.909757	0.250776		4.28715	4.39794	5.19522	5.09769	5.0249	5.37336	3.80526	4.1977	4.93057
ENSNFUG00015005742	OLA.8940	0.689944	1	1.76653	0.057469	1.07658	0.250776		8.60549	6.38743	6.17473	7.65919	8.59228	8.13034	9.3252	9.43858	8.91605
ENSNFUG00015018946	PSMB10	1.19779	0.621946	1.98615	0.00200739	0.788357	0.250853		3.38794	3.56429	3.60397	4.2959	4.56273	4.3822	4.85546	5.41394	4.93057
PBXIP1B	NA	-0.240932	1	1.14643	0.473641	1.38736	0.251235		3.55604	2.77547	2.94649	3.03057	2.92022	2.9533	4.24562	3.91058	3.04255
ENSNFUG00015008441	DCUN1D5	-0.405075	1	0.369811	0.746161	0.774886	0.252658		4.69999	5.17107	4.71437	4.50912	4.61621	4.50626	4.97472	5.65424	4.87954
ENSNFUG00015014342	F3A	-0.584413	1	0.853539	0.638527	1.43795	0.253145		3.55604	2.91815	2.94649	3.03057	2.92022	2.55399	3.67042	3.07302	4.06336
ENSNFUG00015009394	LPAR6A	-1.71341	0.947249	-0.131741	0.963175	1.58167	0.253338		4.37971	3.04797	3.20041	2.60541	2.53227	2.9533	3.67042	3.80059	3.04255
ENSNFUG00015018859	FTR67	-0.37102	1	0.74819	0.604166	1.11921	0.253501		5.5045	3.37931	4.11698	4.04561	4.04385	4.62049	5.03085	5.3761	5.20382
ENSNFUG00015021569	PITHD1	-0.232848	1	0.662417	0.557451	0.895265	0.253501		6.18116	4.34839	5.25248	5.183	4.94356	5.46795	5.93978	5.88733	6.24927
IYD	NA	-0.00248801	1	0.47972	0.371073	0.482208	0.253501		7.97944	7.51854	7.45403	7.59838	7.72137	7.66173	8.31452	8.16835	7.89621
ENSNFUG00015005272	PACSIN2	0.148152	1	-0.799516	0.485663	-0.947668	0.253642		4.08205	5.1993	4.34471	4.57372	5.06391	4.62049	4.04218	4.1977	3.75902
ENSNFUG00015021782	ALDH6A1	0.162837	1	0.887557	0.224332	0.72472	0.253642		8.5862	7.50164	7.12659	7.92985	8.07648	8.08131	9.03052	8.70333	8.44921
TMEM183A	NA	-0.841756	1	-2.64801	0.0947052	-1.80625	0.253642		2.97836	4.85356	3.31237	3.20385	3.58877	3.39972	2.69931	2.35158	2.61347
ENSNFUG00015011165	UBE3A ENSNFUG00015011165	0.194292	1	-1.26857	0.467566	-1.46287	0.25379		2.71968	3.87541	3.51316	3.49822	3.69199	3.63536	2.39162	2.87017	3.04255
ENSNFUG00015001480	APOC2	0.415896	1	-0.222293	0.833914	-0.638189	0.25403		9.91077	10.2623	9.77037	10.0992	10.5944	10.4931	9.14302	9.62155	10.316
ENSNFUG00015019813	FUBP3	0.616255	1	-0.364284	0.824723	-0.980538	0.25403		3.19764	4.24388	4.44638	4.7518	4.44944	4.56451	3.92858	3.55175	3.96887
ENSNFUG00015016085	GID8A	-0.444734	1	0.423086	0.73432	0.867821	0.25403		4.90076	4.18864	4.11698	4.04561	3.9636	4.17348	5.03085	4.7645	4.46059
ENSNFUG00015017451	CALCOCO1	-0.63303	1	0.620052	0.721761	1.25308	0.254052		4.28715	2.91815	3.51316	3.20385	2.92022	3.52235	4.3375	3.68153	4.15204
ENSNFUG00015015269	SLC6A6A	0.831626	1	2.19649	0.0989269	1.36487	0.254153		2.97836	2.61712	2.45509	3.35853	2.73925	2.9533	4.42388	3.40912	3.64142
ENSNFUG00015016443	PSMB4	-0.557823	0.982497	-0.0422715	0.968127	0.515552	0.254453		7.00213	6.60346	6.5393	6.20691	6.27011	6.0804	6.58965	6.61215	6.82229
ENSNFUG00015008452	RHOBTB2	0.81734	1	-0.710137	0.768395	-1.52748	0.254453		3.84289	2.43922	3.84643	4.13395	4.11987	3.92936	2.39162	2.63405	3.75902
RSRC2	NA	-0.657074	1	0.575191	0.74991	1.23227	0.254668		4.77006	3.16708	3.41626	3.49822	3.22565	3.63536	4.79191	4.10819	4.06336
ENSNFUG00015008037	YME1L1B	-0.410412	1	0.634724	0.643921	1.04514	0.254668		4.62633	3.47476	3.60397	3.62558	3.35711	3.92936	4.42388	4.57707	4.31455
SELENOS	NA	0.322513	1	-0.974905	0.557451	-1.29742	0.254668		2.97836	4.9229	5.30756	5.00703	5.0249	4.96127	2.69931	4.1977	4.38941
ENSNFUG00015002666	RAMP2	-0.128542	1	-1.00481	0.264888	-0.87627	0.254668		4.18824	4.9229	4.90501	4.7518	4.66777	4.44556	3.80526	3.80059	4.15204
GSTZ1	NA	0.377154	1	0.880546	0.0395056	0.503392	0.254668		8.56171	8.19461	7.70543	8.54365	8.64146	8.50223	9.0408	8.98997	9.15205
ENSNFUG00015010441	CLTA	0.0223401	1	-0.933217	0.390822	-0.955557	0.254765		4.08205	5.63087	5.87992	5.44716	5.60349	5.20046	4.14748	4.57707	4.93057
PABPN1	NA	-0.533405	1	0.272931	0.837525	0.806335	0.255427		5.92884	6.04269	5.30756	5.26353	5.46462	5.16325	6.55178	6.13402	5.11836
ENSNFUG00015011087	NTPCR	-0.741105	1	0.562601	0.762075	1.30371	0.255427		3.55604	3.04797	3.51316	3.03057	3.08101	2.76742	3.52165	4.1977	3.37284
ENSNFUG00015006741	PREB	0.140135	1	-0.621209	0.515411	-0.761344	0.256704		4.54872	5.58882	5.16571	5.44716	5.24457	5.23674	4.58252	4.50876	4.82664
ENSNFUG00015015382	GNL3	-0.235621	1	-1.38022	0.231216	-1.1446	0.257708		3.55604	4.88864	4.05395	4.2172	4.19208	3.92936	3.35577	3.40912	3.21712
ENSNFUG00015021758	PPIL1	-0.30631	1	-1.48798	0.202101	-1.18167	0.257708		3.38794	4.98906	4.67302	4.04561	4.71755	3.92936	3.35577	3.68153	3.21712
ENSNFUG00015015893	ZCRB1	-0.586374	1	0.516514	0.749876	1.10289	0.258201		4.54872	3.27709	3.77005	3.85083	3.22565	3.39972	4.42388	4.01277	4.46059
UFM1	NA	-1.06286	1	0.244396	0.910528	1.30726	0.258237		3.55604	3.80369	3.31237	2.83359	3.35711	2.55399	3.35577	4.10819	3.64142
ENSNFUG00015015897	CMBL	0.403094	1	-0.483905	0.712499	-0.886999	0.258237		3.70658	4.34839	4.79367	4.7518	4.66777	4.72634	3.92858	3.91058	4.15204
ENSNFUG00015001312	TMC6	0.193759	1	-0.797325	0.526154	-0.991084	0.258237		3.84289	4.18864	4.17737	4.2959	4.19208	4.24646	3.52165	3.07302	3.86776
SPCS2	NA	0.0683475	1	-0.542378	0.456292	-0.610725	0.258237		5.62285	5.73093	5.41179	5.69961	5.62973	5.64034	4.91632	5.03121	5.3232
ENSNFUG00015002387	DNAJA3A	0.0757032	1	-0.794834	0.436757	-0.870537	0.258237		4.28715	5.25414	4.75457	4.80658	4.94356	4.96127	3.67042	4.57707	4.15204
ENSNFUG00015004510	MGAT1A	0.0293037	1	-1.23915	0.393836	-1.26845	0.258237		4.08205	7.51854	6.62853	6.58148	6.99042	6.38517	4.50538	5.41394	6.10122
ENSNFUG00015013184	HP1BP3	0.371849	1	-0.385073	0.742641	-0.756921	0.258512		4.54872	4.74287	4.71437	5.09769	5.13891	4.72634	4.14748	4.64229	4.23558
ENSNFUG00015023839	PRPF40A	0.522978	1	-0.626158	0.713359	-1.14914	0.258512		2.97836	4.44584	3.6894	4.2172	4.32649	4.24646	3.80526	3.25084	3.21712
ENSNFUG00015013087	TCEB1A	-0.468948	1	0.168022	0.875722	0.63697	0.258564		5.73222	5.65144	5.80534	5.26353	5.52178	5.08582	6.10577	6.06434	5.39763
ENSNFUG00015008465	KIAA1161	0.365858	1	-0.894557	0.593201	-1.26042	0.258564		4.37971	3.04797	3.91897	4.13395	3.78832	4.3822	2.95278	2.87017	3.75902
ENSNFUG00015000820	DHRS9	0.455079	1	-0.0979792	0.923444	-0.553058	0.260046		8.2175	8.83726	8.47706	8.89919	9.05611	8.9985	8.01392	8.31557	8.85462
KDSR	NA	0.0336104	1	-1.25804	0.396231	-1.29165	0.261171		2.97836	4.00896	4.05395	3.62558	3.9636	3.83786	2.95278	2.63405	3.37284
ENSNFUG00015000879	TGFB3	0.117839	1	0.927546	0.283071	0.809707	0.261221		4.46669	4.24388	4.75457	4.50912	4.61621	4.67439	4.58252	5.29729	5.77803
DNAJC22	NA	0.398106	1	-0.354387	0.763612	-0.752493	0.261366		4.46669	5.1993	5.28028	5.30218	5.49348	5.40558	4.24562	4.7645	5.07365
ENSNFUG00015000024	COX3	-1.56836	0.704447	-0.368265	0.853854	1.20009	0.262014		14.517	11.3219	11.6929	11.5422	11.766	11.7428	13.1809	12.9127	12.4804
ASPG	NA	0.517489	1	-0.323727	0.817505	-0.841216	0.263241		4.08205	5.2808	4.71437	5.183	5.49348	5.04549	4.24562	4.3616	4.87954
ENSNFUG00015017718	MAP3K7	-0.181231	1	0.451917	0.581923	0.633147	0.263241		5.58447	5.1993	5.33433	5.09769	5.31094	5.20046	6.13166	5.68552	5.46841
ENSNFUG00015004489	RABGEF1L	-0.614914	1	0.588935	0.729853	1.20385	0.263311		4.08205	3.16708	3.20041	3.03057	2.92022	3.39972	4.04218	3.80059	3.86776
ENSNFUG00015012230	CABZ01073085.1	0.18791	1	-0.362235	0.630153	-0.550145	0.263311		6.30435	6.61399	7.05597	6.98929	6.71208	6.93041	6.20668	6.40225	6.43745
ENSNFUG00015022907	GCHFR	0.920165	0.942027	1.72751	0.00689213	0.807346	0.264159		8.89143	8.40007	6.87635	9.31514	9.07533	9.1536	10.2262	10.0504	9.6226
ZGC:162898	NA	-1.13208	1	0.112058	0.963142	1.24414	0.264159		4.69999	3.37931	3.41626	3.20385	3.22565	3.11794	3.80526	4.3616	3.75902
ENSNFUG00015006057	C6H20ORF111	0.746717	1	-0.502711	0.809311	-1.24943	0.264159		3.84289	2.91815	3.6894	4.04561	3.87862	4.17348	2.95278	2.63405	3.75902
ENSNFUG00015010745	GOLT1BA	-0.299153	1	-2.10051	0.267238	-1.80136	0.264159		2.40426	5.25414	3.91897	4.44149	4.11987	3.52235	2	3.55175	2.8439
ENSNFUG00015002633	TXNDC17	-0.587421	1	0.144484	0.911214	0.731905	0.264222		5.66024	5.14229	5.00837	4.80658	4.81224	4.67439	5.71839	5.52186	4.87954
ENSNFUG00015006349	MFAP4	3.6152	1.01269e-07	4.56859	2.86296e-13	0.953388	0.26491		5.58447	5.1993	5.00837	9.19963	7.62683	8.9799	10.2081	9.97007	8.23755
ENSNFUG00015006939	QRICH1	-0.0769465	1	0.942052	0.42458	1.019	0.26491		3.96742	3.16708	3.51316	3.35853	3.47758	3.63536	4.3375	4.3616	3.96887
ENSNFUG00015015456	PA2G4B	-0.03802	1	-0.799816	0.349301	-0.761796	0.26491		5.41985	6.56059	6.55076	6.22713	6.2867	6.21377	4.91632	5.52186	5.96098
EMC1	NA	0.579413	1	-0.564565	0.757331	-1.14398	0.265189		3.19764	3.47476	3.6894	3.85083	3.87862	3.92936	2.95278	3.25084	3.21712
ENSNFUG00015019053	RAB14L	0.372941	1	-0.992259	0.588675	-1.3652	0.265734		3.19764	3.64858	3.31237	3.85083	3.58877	3.52235	2.39162	2.63405	3.37284
TMEM14CA	NA	-0.959473	0.942027	-0.1121	0.944743	0.847373	0.265788		6.89644	5.33268	5.48529	5.22383	5.1019	5.23674	6.10577	5.99112	5.77803
ENSNFUG00015002498	SPRY1	0.119643	1	1.00516	0.299216	0.885515	0.265788		3.38794	3.94373	3.77005	4.04561	3.58877	3.83786	4.58252	4.50876	4.46059
CTDSP2	NA	0.820711	1	-0.357151	0.85833	-1.17786	0.265868		4.69999	2.61712	4.75457	4.91029	4.94356	5.04549	4.04218	3.80059	4.15204
OXCT1A	NA	0.247339	1	-0.297175	0.712923	-0.544514	0.265868		6.1552	6.19061	6.27487	6.22713	6.57025	6.50898	5.75218	5.71614	6.24927
ENSNFUG00015006026	TMEM53	0.55638	1	-0.712528	0.705115	-1.26891	0.265889		2.97836	4.9229	5.10482	5.00703	5.40509	4.82495	3.67042	3.07302	4.82664
ENSNFUG00015001001	SMYD5	-0.092909	1	-1.4375	0.332211	-1.3446	0.26596		2.97836	4.18864	3.91897	3.49822	3.9636	3.74016	2.39162	3.07302	3.21712
ENSNFUG00015025200	C12ORF23	-0.442867	1	-1.45203	0.120083	-1.00917	0.266016		4.28715	5.61	4.67302	4.80658	4.76568	4.17348	3.52165	4.10819	3.75902
ST3GAL5	NA	0.465876	1	-0.692936	0.681338	-1.15881	0.266251		2.71968	4.66405	4.58659	4.50912	4.56273	4.82495	3.67042	3.25084	4.15204
B4GALT1L	NA	0.344466	1	-0.724609	0.623022	-1.06907	0.266251		3.38794	4.18864	4.71437	4.37053	4.61621	4.50626	2.95278	3.68153	4.15204
ENSNFUG00015020691	ZNRF2A	0.40989	1	1.33132	0.133341	0.921428	0.266251		5.23399	3.47476	4.44638	4.69484	4.56273	5.23674	5.45677	5.58957	5.96098
SLC25A3B	NA	-0.343359	1	0.146975	0.85707	0.490334	0.267046		7.79847	7.22107	7.27906	7.06989	7.08828	7.18368	7.70449	7.67877	7.37642
CLASRP	NA	-0.611625	1	0.49467	0.770765	1.1063	0.267409		5.13123	3.80369	3.51316	3.74259	3.78832	3.92936	5.08488	4.7645	4.06336
ENSNFUG00015003662	SLC43A3B	-0.335602	1	-1.36742	0.175002	-1.03182	0.268217		3.55604	5.17107	5.00837	4.44149	4.44944	4.56451	3.52165	3.68153	3.86776
ENSNFUG00015012932	COX7B2	-0.844898	1	0.0074036	0.994256	0.852302	0.268645		10.1181	8.21203	8.56162	8.19921	8.71071	8.15425	9.48191	9.18316	8.95354
ENSNFUG00015010599	APG3L	-0.520774	1	0.0922155	0.933066	0.612989	0.268645		5.54504	5.38276	5.33433	4.91029	4.9848	4.96127	5.6838	5.25622	5.53588
UAP1	NA	0.493599	1	-0.640675	0.706218	-1.13427	0.268645		3.19764	4.9229	3.91897	4.57372	4.76568	4.50626	3.35577	4.28197	3.37284
ENSNFUG00015013799	TMEM165	-0.299116	1	-1.60537	0.234061	-1.30625	0.268645		2.97836	5.35794	4.29106	4.50912	4.26085	4.0966	2.95278	3.40912	3.64142
ENSNFUG00015005121	AOC2	0.393357	1	-0.613649	0.676467	-1.00701	0.269628		4.08205	3.80369	4.34471	4.50912	4.56273	4.0966	2.95278	3.55175	4.15204
ENSNFUG00015010667	RHOUB	0.822108	1	-0.598954	0.803867	-1.42106	0.270413		2.40426	3.27709	3.51316	3.9515	3.58877	3.52235	2.39162	2.87017	3.21712
ENSNFUG00015002018	PPM1H	-0.414266	1	0.671642	0.65046	1.08591	0.270413		4.62633	3.04797	3.77005	3.49822	3.58877	3.74016	4.65575	4.43705	4.15204
ENSNFUG00015009364	VPS35	0.200284	1	-0.703857	0.555077	-0.904141	0.270413		4.62633	4.18864	4.39644	4.57372	4.71755	4.3822	3.80526	3.25084	4.31455
AGPAT4	NA	-0.171515	1	-1.36658	0.287155	-1.19506	0.270413		3.55604	4.1312	4.05395	4.04561	3.69199	3.74016	2.39162	3.25084	3.37284
ENSNFUG00015021855	PLRG1	-0.312965	1	0.610394	0.616361	0.923359	0.270691		4.08205	4.00896	3.51316	3.62558	3.58877	3.74016	4.42388	4.43705	4.15204
THRB	NA	-0.176902	1	0.673733	0.54	0.850635	0.270947		5.41985	4.4922	3.98804	4.63555	4.38928	4.67439	5.4152	5.45082	5.02752
FGFR4	NA	2.86227	0.0536087	1.64669	0.319801	-1.21558	0.270982		3.19764	2.23626	2.45509	4.13395	4.26085	4.44556	2.95278	3.07302	3.96887
ENSNFUG00015004635	RPZ	0.713317	1	-0.549107	0.791528	-1.26242	0.270982		2.71968	4.34839	4.49464	4.85937	4.5072	4.56451	2.69931	3.40912	4.38941
CCKAR	NA	0.968173	1	-1.05706	0.743917	-2.02523	0.270982		2	3.56429	3.51316	4.2172	3.58877	3.63536	2	2	3.51337
ENSNFUG00015000503	HAAO	-0.240951	1	0.360837	0.678123	0.601788	0.270982		8.73816	7.75556	7.61553	7.89235	7.86082	7.90092	8.55839	8.36471	8.50499
ENSNFUG00015021711	DGAT1A	0.284251	1	-0.865755	0.570996	-1.15001	0.270982		3.84289	5.25414	5.76655	5.09769	5.60349	5.52773	3.52165	3.80059	5.28449
ENSNFUG00015010348	HSD17B7	-0.785949	1	-1.71332	0.0310585	-0.927374	0.270982		7.56217	7.44384	8.71719	7.47697	7.33946	6.90809	6.20668	5.17038	7.10373
CD164	NA	0.882763	1	-0.339839	0.876805	-1.2226	0.271149		2.71968	4.58069	4.79367	5.00703	5.06391	5.08582	3.35577	3.40912	4.82664
TIMM50	NA	0.3178	1	-0.906389	0.582668	-1.22419	0.271149		2.71968	4.29708	3.84643	4.04561	3.87862	4.17348	3.35577	3.40912	2.8439
PSMD11	NA	-0.0866866	1	-1.28905	0.337019	-1.20236	0.271149		2.97836	4.58069	4.11698	4.04561	3.9636	4.01541	2.95278	3.40912	3.21712
ENSNFUG00015009754	COL4A3BP	-0.0166127	1	0.896132	0.398554	0.912744	0.271496		3.70658	3.80369	3.6894	3.62558	3.35711	4.0966	4.42388	4.50876	4.31455
COX7C	NA	-0.706655	1	0.0412798	0.979454	0.747935	0.271667		10.6195	9.12896	9.18074	9.04017	9.22698	9.07563	10.1835	9.76755	9.55915
TYMP	NA	0.46112	1	1.01683	0.0406019	0.555708	0.271719		5.41985	5.02103	5.04124	5.51454	5.46462	5.71938	5.9688	6.20049	6.07877
ENSNFUG00015005961	TIMP2A	1.34424	0.496362	0.448418	0.762426	-0.895818	0.272102		3.19764	4.58069	4.54135	5.30218	5.57677	5.37336	4.42388	4.10819	5.16172
ENSNFUG00015020006	BX571714.2	0.306836	1	-0.521449	0.664474	-0.828285	0.272547		4.18824	5.05232	4.58659	4.85937	4.94356	5.00399	4.14748	3.80059	4.65519
APOH	NA	-0.124467	1	0.211476	0.661697	0.335942	0.272695		11.7782	11.5751	11.5866	11.5362	11.5791	11.4573	11.7563	11.8354	11.9809
ENSNFUG00015007905	DHX15	0.204255	1	-0.673808	0.565739	-0.878063	0.273181		3.84289	4.4922	4.79367	4.7518	4.71755	4.3822	3.67042	4.01277	4.06336
CBX7A	NA	0.777606	1	2.19218	0.133341	1.41457	0.273181		3.38794	2.23626	2.24542	3.03057	2.73925	3.11794	3.92858	3.68153	3.86776
ENSNFUG00015013213	USP16	0.157207	1	-1.18906	0.480848	-1.34627	0.273276		2.71968	3.94373	3.60397	3.74259	3.58877	3.63536	2.69931	3.07302	2.8439
SEM1	NA	-1.28724	0.594781	-0.373277	0.797644	0.913964	0.273549		6.78238	5.5455	5.57782	4.63555	5.46462	4.3822	6.10577	5.77549	5.16172
ENSNFUG00015006808	GLTPD1	-1.55238	0.90193	-3.13647	0.0140641	-1.58409	0.273549		4.18824	5.43116	4.23533	3.20385	4.04385	3.2657	2	3.40912	2.3391
BTF3L4	NA	-0.486717	1	0.0442449	0.969303	0.530961	0.273549		6.32777	5.979	6.2328	5.72827	5.75422	5.69351	6.02516	6.45765	6.14509
ENSNFUG00015000426	FP236812.4	-1.19338	1	0.113987	0.963867	1.30737	0.273549		3.70658	3.27709	3.51316	2.83359	2.92022	2.76742	3.35577	3.25084	3.96887
SCP2A	NA	0.397561	1	-0.135439	0.889904	-0.532999	0.273549		7.60114	7.8741	7.88365	7.99027	8.22156	8.32403	7.29864	7.42445	8.11605
ENSNFUG00015007653	WDR61	-0.489627	1	0.173153	0.879844	0.66278	0.273549		5.86623	5.14229	5.10482	5.00703	4.9848	4.87184	5.6838	5.48678	5.46841
DLDH	NA	0.350978	1	-0.429752	0.717852	-0.78073	0.273549		4.46669	5.05232	5.13558	5.05307	5.31094	5.3404	3.92858	4.50876	5.02752
ENSNFUG00015018142	NDUFB10	-0.180139	1	0.383553	0.62265	0.563692	0.273549		8.01595	7.21417	7.12659	7.06989	7.46864	7.40704	7.9858	7.84729	7.79657
ENSNFUG00015008093	SDF4	0.195835	1	-0.754546	0.550643	-0.95038	0.273549		3.55604	4.98906	5.19522	4.95947	4.9848	4.87184	3.80526	4.01277	4.52842
ENSNFUG00015000241	Nfu_g_1_015927	0.0240753	1	1.09563	0.37795	1.07155	0.273549		3.84289	3.27709	4.11698	3.85083	3.22565	4.17348	4.3375	4.01277	5.24472
ENSNFUG00015003744	Nfu_g_1_018818	-0.0964519	1	-1.57805	0.34994	-1.4816	0.273549		4.46669	4.07137	3.6894	3.85083	4.38928	3.74016	2.39162	2	3.96887
ENSNFUG00015022351	CLEP	0.458297	1	0.914508	0.01832	0.456212	0.274111		7.84791	7.51293	7.42941	7.96037	8.00812	8.18242	8.19678	8.71853	8.54648
ENSNFUG00015003880	PSMD14	-0.569746	1	-1.68489	0.103828	-1.11514	0.274493		3.70658	6.16221	5.55523	5.00703	5.24457	4.56451	4.3375	4.01277	3.75902
ENSNFUG00015006106	PPP4C	-0.22187	1	-1.37076	0.267414	-1.14889	0.274815		3.96742	6.11854	4.83175	5.00703	5.31094	4.82495	3.1683	4.1977	4.5932
TPM4B	NA	-0.735295	1	0.109825	0.944743	0.845119	0.274837		4.69999	4.29708	4.39644	3.9515	3.9636	3.74016	4.91632	4.1977	4.46059
BTBD10	NA	0.508976	1	-0.583581	0.73432	-1.09256	0.275177		2.97836	4.24388	4.58659	4.50912	4.5072	4.56451	3.35577	3.25084	4.23558
CNIH1	NA	-0.348515	1	-1.33629	0.165175	-0.987771	0.275177		4.18824	4.39794	4.39644	4.2959	4.11987	3.74016	3.52165	3.40912	3.21712
ENSNFUG00015012540	OATX	1.12878	0.594781	1.87348	0.00197018	0.744702	0.275517		5.02059	4.53712	3.51316	5.48124	5.24457	5.52773	6.10577	5.94016	6.26923
ENSNFUG00015022450	NDUFA11	-0.760134	1	-0.0450378	0.977329	0.715096	0.275517		8.30861	7.06878	6.94744	6.82651	6.89628	6.77874	7.83633	7.41515	7.28133
ENSNFUG00015019546	PTER	-0.473327	1	0.263645	0.832657	0.736972	0.275517		5.4628	4.53712	4.94029	4.44149	4.85736	4.44556	5.37239	5.21394	5.11836
PGM2	NA	0.183785	1	-1.07137	0.509134	-1.25515	0.275517		2.71968	4.34839	4.05395	4.13395	4.04385	3.92936	2.69931	3.07302	3.64142
F7L	NA	0.38147	1	0.767277	0.019691	0.385807	0.275517		9.25436	8.83726	8.8437	9.35933	9.30029	9.44083	9.73939	9.69831	9.81481
LCAT	NA	0.0153066	1	-0.616543	0.419185	-0.63185	0.275914		7.21808	8.05487	8.19248	7.8342	8.04271	7.81355	6.83006	7.13828	7.7261
ENSNFUG00015021276	NEK7	0.494895	1	-1.022	0.637989	-1.5169	0.276021		2.40426	4.1312	3.41626	3.9515	3.78832	3.83786	2	3.07302	3.37284
ST7	NA	-0.0545201	1	-1.07391	0.360131	-1.01939	0.276021		3.70658	4.24388	4.29106	3.85083	4.11987	4.24646	3.35577	3.07302	3.64142
FUOM	NA	-0.540939	1	0.869301	0.645003	1.41024	0.276193		3.70658	2.77547	2.80053	2.83359	2.73925	2.9533	4.14748	3.25084	3.37284
ENSNFUG00015012550	RMDN1	0.0991665	1	-0.749459	0.484856	-0.848626	0.276193		4.28715	5.22698	4.94029	4.7518	5.06391	5.08582	3.80526	4.01277	4.77173
ENSNFUG00015012713	WWP1	1.12294	1	0.0445736	0.985121	-1.07837	0.276546		2.97836	3.16708	3.60397	3.9515	3.87862	4.31592	3.1683	3.40912	3.37284
ENSNFUG00015013898	ATPAF2	-0.000825968	1	-1.46911	0.400043	-1.46829	0.276733		2.40426	4.74287	3.6894	3.85083	4.26085	3.63536	2.69931	3.07302	3.21712
PSPH	NA	-0.105915	1	1.19206	0.444186	1.29797	0.277075		3.38794	2.91815	2.80053	3.20385	2.73925	2.9533	3.67042	4.1977	3.21712
RBM8A	NA	-0.374884	1	0.107486	0.904234	0.48237	0.27762		6.28053	6.57143	6.692	6.20691	6.20179	6.11978	6.76536	6.66018	6.47231
ENSNFUG00015017220	HMG20A	-0.694727	1	0.447045	0.809311	1.14177	0.27762		5.32991	3.04797	4.39644	4.04561	3.58877	4.17348	4.58252	4.82194	5.16172
ENSNFUG00015023786	HBS1L	0.567461	1	-0.481798	0.782026	-1.04926	0.27762		3.38794	4.24388	3.98804	4.44149	4.32649	4.3822	2.95278	3.25084	4.23558
SEPTIN8A	NA	0.272659	1	-0.712365	0.601932	-0.985024	0.27762		3.38794	4.62297	4.17737	4.44149	4.61621	4.0966	3.52165	3.80059	3.64142
KLHL24A	NA	1.74931	1	-1.43462	0.787271	-3.18394	0.278809		2.97836	2	4.34471	4.85937	4.38928	4.91725	2	2	3.51337
KPNB1	NA	0.251902	1	-0.743063	0.583688	-0.994964	0.278809		3.38794	5.33268	5.19522	4.95947	5.34301	5.00399	3.92858	4.64229	4.15204
ENSNFUG00015002764	GADD45GIP1 ENSNFUG00015002764	-0.783704	0.912072	-0.115315	0.92499	0.668389	0.280827		5.62285	5.33268	5.00837	4.69484	4.56273	4.67439	5.4152	5.21394	5.02752
ENSNFUG00015006450	PIGL	-1.06343	1	0.300441	0.898448	1.36387	0.280827		3.96742	2.61712	3.6894	2.83359	2.92022	2.9533	3.52165	3.40912	4.06336
SEPTIN7B	NA	0.232312	1	-0.540807	0.620457	-0.773119	0.280827		4.08205	4.74287	4.79367	4.7518	4.81224	4.82495	4.04218	4.28197	4.15204
MARS1	NA	0.0380673	1	-1.26218	0.422738	-1.30025	0.280827		2.71968	3.87541	4.05395	3.85083	3.78832	3.52235	2.69931	3.07302	3.04255
ENSNFUG00015023480	HMG20B	0.0890639	1	1.12699	0.348024	1.03792	0.280827		3.96742	3.37931	3.07903	3.49822	3.47758	3.63536	4.58252	4.50876	3.64142
GLS2	NA	1.66361	1	3.22454	0.0282401	1.56093	0.280827		3.55604	2.61712	2	3.20385	3.08101	4.50626	5.53648	5.29729	3.37284
ENSNFUG00015012349	RAB21	-0.274885	1	0.472583	0.651739	0.747468	0.280902		4.18824	4.44584	4.39644	4.13395	4.11987	4.17348	4.58252	4.87717	4.77173
PRDX5	NA	0.00758418	1	0.481003	0.395136	0.473419	0.280902		7.03096	6.66547	6.45643	6.77249	6.63645	6.79099	7.32132	7.0569	7.19004
ENSNFUG00015022769	MRPL39	-0.441712	1	0.247661	0.833554	0.689373	0.280968		5.37558	4.85356	4.83175	4.69484	4.71755	4.50626	5.53648	4.98167	5.16172
ENSNFUG00015023401	RIOK3	-0.268853	1	0.544665	0.630002	0.813518	0.280968		4.37971	4.74287	4.63045	4.2959	4.11987	4.67439	5.64836	4.70469	4.65519
ENSNFUG00015001685	SLC35A1	-0.168866	1	-1.4073	0.311758	-1.23844	0.280968		2.71968	4.62297	4.58659	3.85083	4.26085	4.17348	2.95278	3.40912	3.37284
ENSNFUG00015019255	DLAT	-0.104821	1	-1.14669	0.332964	-1.04187	0.280996		3.55604	4.85356	4.11698	4.2959	4.11987	4.24646	3.1683	3.55175	3.64142
SPTSSA	NA	0.500494	1	-0.450046	0.774625	-0.95054	0.281314		3.19764	4.95636	4.67302	5.05307	4.81224	4.87184	3.92858	4.43705	3.96887
FARP1	NA	-0.233346	1	0.768558	0.556713	1.0019	0.281314		3.96742	3.27709	3.60397	3.49822	3.35711	3.52235	4.24562	4.43705	3.75902
SLC30A7	NA	0.162285	1	-0.760792	0.538973	-0.923078	0.281314		3.84289	5.40716	5.04124	5.183	5.1019	4.91725	3.80526	4.10819	4.77173
MRPL41	NA	-0.845985	0.594781	-0.250171	0.79145	0.595814	0.281724		6.12878	5.979	5.5323	5.14098	5.2102	5.00399	5.78519	5.62227	5.56847
TMUB1	NA	-0.506981	1	0.431518	0.763612	0.938499	0.281724		3.70658	3.87541	3.91897	3.49822	3.47758	3.52235	4.24562	4.3616	3.86776
APMAP	NA	1.15279	0.798953	0.266062	0.866962	-0.886729	0.282276		4.62633	6.13325	6.01843	6.64299	6.88543	6.97404	4.85546	6.06434	6.5721
ENSNFUG00015011282	VKORC1	-0.325748	1	0.210814	0.814851	0.536562	0.283131		6.39584	6.16221	6.2328	5.96344	6.13007	5.74479	6.74872	6.47566	6.10122
IFI27.7	NA	-0.382424	1	0.384883	0.755069	0.767307	0.283131		7.57201	6.43568	6.38139	6.48401	6.89628	6.10022	7.37652	7.63136	6.63499
ENSNFUG00015010796	EGLN2	0.631906	1	-0.706574	0.74991	-1.33848	0.283131		2.97836	3.64858	2.94649	3.62558	3.9636	3.2657	2.69931	2.87017	3.04255
ENSNFUG00015017426	KRI1	-0.536399	1	0.448052	0.771201	0.984451	0.283858		4.08205	4.29708	3.51316	3.62558	3.78832	3.39972	4.42388	4.70469	3.75902
HSD17B4	NA	0.945393	0.220063	0.413845	0.582668	-0.531548	0.284507		5.41985	5.5455	5.62194	6.28616	6.45757	6.50898	5.6838	5.74612	6.24927
ENSNFUG00015021310	BRP44	-0.172599	1	-0.740567	0.221402	-0.567968	0.284507		7.59149	7.98768	7.33315	7.39889	7.43927	7.6348	6.45253	6.87891	7.34854
ENSNFUG00015003594	RBX1	-0.83957	0.728846	-0.212358	0.842802	0.627212	0.284548		6.58268	6.54967	6.70231	5.96344	5.99529	5.4371	6.90706	6.26403	5.8854
ENSNFUG00015013564	PSMD2	0.217383	1	-0.705577	0.577827	-0.92296	0.284548		3.38794	4.58069	4.79367	4.69484	4.56273	4.50626	3.92858	3.91058	3.75902
RPS21	NA	-0.467608	1	0.259195	0.839605	0.726803	0.284732		10.5614	8.78701	9.49883	9.31514	9.53011	9.12969	10.2515	10.0231	9.87304
ENSNFUG00015016029	PXK	0.620245	1	-0.723453	0.745787	-1.3437	0.284887		2.40426	3.64858	3.31237	3.62558	3.69199	3.63536	2.69931	2.87017	3.04255
NDUFB1	NA	-0.457324	1	0.267921	0.833765	0.725245	0.284911		7.29139	6.36269	6.49253	6.37946	6.80712	5.52773	7.28716	6.98329	6.76721
SPG7	NA	0.594387	1	-0.572215	0.771201	-1.1666	0.284911		3.19764	3.16708	3.77005	3.74259	4.04385	3.63536	2.95278	3.07302	3.21712
PPP1R3B	NA	0.576228	1	-0.581847	0.762927	-1.15808	0.284911		2.97836	3.80369	3.6894	3.62558	3.69199	4.44556	2.95278	3.25084	3.37284
ENSNFUG00015012585	METRNL	-0.104877	1	1.43278	0.448507	1.53766	0.284911		2.40426	2.77547	3.41626	3.03057	3.08101	2.55399	4.50538	3.80059	2.61347
ENSNFUG00015013935	ASCC2	0.477888	1	-0.572004	0.737155	-1.04989	0.285159		3.38794	3.72822	3.84643	3.9515	4.11987	4.01541	2.69931	3.55175	3.51337
SLC48A1B	NA	0.842404	1	1.90413	0.0664769	1.06173	0.285159		3.55604	3.27709	2.94649	4.13395	3.47758	3.74016	5.08488	4.87717	3.51337
UBAP2B	NA	0.636852	1	-0.379421	0.837525	-1.01627	0.285264		2.97836	3.94373	4.29106	4.57372	4.19208	4.31592	3.1683	3.80059	3.75902
ENSNFUG00015009025	SNX7	0.64727	1	-0.210148	0.900737	-0.857417	0.28537		3.38794	4.4922	4.67302	4.85937	4.81224	4.91725	3.92858	4.01277	4.46059
TUSC3	NA	-0.288065	1	-1.06373	0.180272	-0.775664	0.28537		4.83689	6.02703	6.00183	5.51454	5.52178	5.37336	4.3375	5.17038	4.71464
ENSNFUG00015019046	IRF2BP2A	0.106291	1	0.974407	0.332211	0.868116	0.285646		4.96192	3.37931	4.49464	4.44149	4.32649	4.62049	5.03085	5.45082	5.11836
ENSNFUG00015018034	SOD1	-0.622549	0.889201	-0.122828	0.89657	0.49972	0.285861		10.0082	9.26703	9.24916	8.90547	9.05127	8.83361	9.62553	9.27084	9.36876
ENSNFUG00015000254	MVB12BA	0.352726	1	-0.7359	0.643921	-1.08863	0.286017		2.97836	4.34839	3.84643	3.85083	4.26085	4.24646	3.1683	3.40912	3.51337
NOC4L	NA	0.14093	1	-0.761147	0.52898	-0.902077	0.286017		3.55604	5.02103	4.86885	4.85937	4.76568	4.67439	3.92858	4.28197	3.86776
NDUFA3	NA	-0.80982	1	-0.029073	0.985654	0.780747	0.286736		6.89644	5.61	5.62194	5.54708	5.49348	5.16325	6.5129	6.04034	5.7499
APLP2	NA	0.839426	0.882622	0.170329	0.89657	-0.669097	0.287575		5.13123	4.74287	5.25248	5.83754	5.54954	6.01923	4.91632	4.87717	5.66203
CLK2A	NA	-1.0666	1	0.212761	0.925842	1.27937	0.287575		4.83689	3.04797	3.41626	3.20385	3.35711	3.11794	4.58252	3.91058	3.64142
ENSNFUG00015013256	NARG2	-1.13554	1	0.231343	0.92449	1.36688	0.287575		4.28715	2.77547	3.31237	2.83359	2.92022	2.9533	3.35577	4.10819	3.51337
PNISR	NA	-0.577592	1	0.347043	0.825829	0.924635	0.287575		5.41985	4.29708	4.17737	4.13395	4.26085	4.31592	5.28277	5.29729	4.23558
MYO1B	NA	0.406363	1	-0.559258	0.712499	-0.965621	0.287575		3.55604	3.87541	4.05395	4.13395	4.11987	4.24646	3.52165	3.07302	3.75902
ENSNFUG00015019720	TMA16	-0.326768	1	0.423748	0.706429	0.750516	0.287575		4.90076	4.24388	4.58659	4.2959	4.32649	4.31592	4.72543	5.29729	4.71464
PPP1CB	NA	0.314524	1	-0.522013	0.680966	-0.836537	0.287575		4.28715	4.88864	5.00837	4.95947	5.06391	5.12505	3.80526	3.91058	4.97986
ENSNFUG00015017684	RCBTB1	0.00234085	1	0.904026	0.416148	0.901685	0.287575		5.18352	3.94373	3.84643	4.13395	4.38928	4.67439	4.91632	4.93036	5.60034
ENSNFUG00015002802	RAB11A	-0.170271	1	-1.0466	0.281591	-0.87633	0.287575		4.18824	4.62297	4.58659	4.2959	4.44944	4.31592	3.35577	3.55175	4.06336
ENSNFUG00015008204	MRPL13	-0.149626	1	-0.812372	0.264888	-0.662746	0.287575		5.23399	5.99519	5.91582	5.75637	5.6555	5.46795	4.65575	4.98167	5.3609
SI:CH211-140B10.6	NA	-0.87437	1	-0.0784686	0.962647	0.795901	0.2879		5.41985	4.704	4.75457	4.37053	4.19208	4.17348	5.37239	4.50876	4.71464
SULT6B1	NA	0.408073	1	-0.183433	0.861777	-0.591507	0.288511		4.96192	5.67173	5.57782	5.72827	5.77788	5.97697	5.37239	5.29729	5.20382
ENSNFUG00015002609	DYNC2I1	-0.546378	1	0.723404	0.687931	1.26978	0.288533		3.19764	3.04797	3.31237	3.03057	2.92022	2.76742	4.14748	3.40912	3.21712
TMOD2	NA	0.175098	1	-1.0943	0.521733	-1.26939	0.289688		3.19764	3.94373	3.6894	3.74259	3.9636	3.63536	2.39162	2.63405	3.64142
ENSNFUG00015020135	RRAGC	-0.742818	1	0.0842552	0.960366	0.827073	0.290007		4.37971	4.4922	4.39644	3.62558	3.69199	4.17348	4.58252	4.70469	4.15204
ENSNFUG00015005329	PBX2	-0.635171	1	0.277055	0.85433	0.912226	0.290161		4.18824	3.72822	4.05395	3.49822	3.35711	3.74016	4.24562	4.28197	4.06336
ENSNFUG00015019133	H2AFVB	-0.421806	1	-1.15127	0.101003	-0.729466	0.290508		5.89788	7.30788	6.66061	6.36128	6.63645	5.93342	5.91015	5.58957	5.43346
MRPL18	NA	-0.60972	1	0.096792	0.944743	0.706512	0.290916		5.23399	4.95636	4.67302	4.2959	4.56273	4.44556	5.37239	4.87717	4.82664
FAM107B	NA	-1.11241	1	0.126734	0.959327	1.23915	0.291111		4.28715	2.91815	3.6894	3.03057	2.92022	3.11794	3.52165	4.10819	3.64142
COX6C	NA	-0.758747	1	0.0535598	0.977329	0.812307	0.291442		10.5601	8.82146	8.78426	8.71096	9.11767	8.80973	10.0524	9.52973	9.42989
ENSNFUG00015022939	RBB4	-0.0957299	1	-1.11541	0.355803	-1.01968	0.291487		3.38794	5.35794	4.79367	4.57372	4.94356	4.44556	3.92858	4.01277	3.64142
CERS2A	NA	0.32946	1	-0.843598	0.618938	-1.17306	0.292236		3.19764	4.24388	4.23533	4.44149	4.11987	4.17348	2.95278	2.63405	4.15204
ENSNFUG00015015810	UROS	-0.531917	1	0.356036	0.810588	0.887953	0.29272		5.4628	3.94373	4.29106	4.2172	4.19208	4.31592	5.13695	4.7645	5.02752
ENSNFUG00015015655	GOLM1	0.378412	1	-0.71067	0.66585	-1.08908	0.29272		3.70658	3.37931	3.84643	3.9515	3.78832	4.01541	2.95278	2.87017	3.64142
LONP2	NA	0.743882	1	0.0016811	0.998941	-0.742201	0.294342		4.18824	4.18864	4.67302	4.80658	5.06391	5.12505	4.04218	4.28197	4.71464
ENSNFUG00015022062	HDHD3	-0.784652	1	0.36796	0.845921	1.15261	0.294342		4.18824	3.27709	3.31237	3.20385	3.08101	3.11794	3.92858	4.1977	3.37284
ENSNFUG00015013815	REXO4	0.395657	1	-0.815861	0.654889	-1.21152	0.295078		2.71968	4.1312	3.41626	3.74259	3.87862	3.92936	2.95278	3.25084	3.04255
ASAH1B	NA	1.17405	1	-0.173051	0.95477	-1.3471	0.295162		2.71968	3.64858	3.84643	4.63555	4.11987	4.31592	2.39162	2.63405	4.31455
ENSNFUG00015002049	ELP5	-0.213775	1	-1.28211	0.287155	-1.06834	0.295391		3.96742	4.34839	4.05395	4.13395	4.11987	3.63536	2.69931	3.80059	3.04255
CLIC2	NA	0.78535	1	-0.371674	0.86087	-1.15702	0.296277		2.40426	3.87541	3.6894	4.04561	4.19208	3.92936	3.52165	2.87017	3.37284
DPY19L1L	NA	-0.0663023	1	-0.932533	0.368154	-0.866231	0.296343		4.62633	4.34839	4.11698	4.13395	4.5072	4.24646	3.67042	3.55175	3.75902
GCGA	NA	6.96179	0.344118	3.22873	0.583857	-3.73306	0.296738		2	2	2.24542	6.1013	2	5.84219	2.69931	2	3.37284
ENSNFUG00015004915	RTFDC1	0.520903	1	-0.649111	0.737364	-1.17001	0.296738		2.97836	3.80369	3.60397	4.13395	3.69199	3.83786	2.69931	2.87017	3.64142
ENSNFUG00015024635	RAB8A	0.0103808	1	-1.48218	0.427803	-1.49256	0.296947		2	5.14229	3.98804	4.2172	4.5072	3.92936	3.1683	3.40912	3.04255
PRIM1	NA	0.057703	1	-1.34946	0.453396	-1.40716	0.297131		2.97836	3.72822	3.6894	3.35853	3.9636	3.2657	2	3.07302	3.04255
CRCP	NA	-0.341557	1	-1.33397	0.20311	-0.992416	0.297131		3.84289	4.704	4.23533	4.04561	4.19208	3.92936	3.1683	3.25084	3.64142
ENSNFUG00015025413	NDUFB5	-0.0509156	1	0.436695	0.499888	0.487611	0.297682		8.55676	7.90442	7.70029	8.09302	8.01808	8.02538	8.60073	8.38867	8.58282
ENSNFUG00015009235	BLCAP	1.03529	1	-0.275944	0.917064	-1.31123	0.298546		2.97836	4.00896	2.94649	4.44149	3.9636	4.01541	2.95278	2.35158	3.96887
SERPINC1	NA	0.473597	0.704447	0.80806	0.00343959	0.334463	0.299329		8.08631	8.15193	8.07438	8.49861	8.58894	8.62706	8.77928	8.9551	8.96888
CEP20	NA	-0.536658	1	0.47558	0.774625	1.01224	0.299839		5.23399	3.37931	4.11698	4.13395	3.78832	4.01541	4.3375	4.93036	5.02752
TMEM14CB	NA	-0.627771	1	0.324324	0.842543	0.952095	0.300312		3.70658	4.29708	4.29106	3.62558	3.9636	3.39972	4.58252	4.7645	3.64142
UCK2B	NA	-0.32523	1	0.165892	0.846313	0.491122	0.300329		6.25632	6.36269	6.11423	5.98735	6.09283	5.71938	6.20668	6.57922	6.40172
TOMM20B	NA	-0.430614	1	0.298644	0.809311	0.729257	0.300329		5.62285	4.704	4.63045	4.63555	4.81224	4.50626	5.37239	5.45082	5.02752
ENSNFUG00015009071	ZMYND11	-0.530536	1	0.736562	0.688026	1.2671	0.300329		3.55604	2.77547	3.20041	2.83359	2.73925	3.11794	4.04218	3.40912	3.37284
ENSNFUG00015008772	ASPA	-0.692489	1	1.18909	0.669008	1.88157	0.300329		4.69999	2	2.63813	2.83359	2.29055	3.83786	4.65575	4.70469	3.75902
COPG2	NA	0.169855	1	-0.516956	0.598263	-0.68681	0.300329		4.62633	5.33268	5.38643	5.30218	5.46462	5.20046	5.08488	4.43705	4.5932
MRRF	NA	-0.739124	1	0.137118	0.932578	0.876243	0.300537		4.46669	3.80369	4.17737	3.49822	3.69199	3.63536	4.3375	4.28197	4.15204
ENSNFUG00015000923	PKP4	-0.364615	1	0.897383	0.602675	1.262	0.300537		3.55604	2.77547	2.94649	2.83359	2.73925	3.11794	3.92858	3.55175	3.37284
RAB3DB	NA	-0.315558	1	0.723752	0.626203	1.03931	0.30069		4.54872	3.47476	3.77005	4.2172	3.35711	3.52235	5.03085	4.57707	3.75902
ENSNFUG00015019680	SIGMAR1	-0.196818	1	-0.838062	0.233695	-0.641244	0.30069		5.32991	5.92932	5.74676	5.51454	5.49348	5.55672	4.58252	4.7645	5.3609
ENSNFUG00015001724	ABCA1B	0.468103	1	-0.262558	0.843411	-0.730661	0.300956		5.02059	4.1312	4.83175	4.91029	5.0249	5.30666	4.50538	4.57707	4.31455
ENSNFUG00015025098	TSC22D2	0.581461	1	-0.762718	0.733655	-1.34418	0.301522		3.70658	2.43922	3.51316	3.62558	3.69199	3.63536	2.69931	2.87017	3.04255
ENSNFUG00015005774	MGST3	-1.04257	0.46926	-0.386603	0.703202	0.655964	0.301991		8.0303	6.86365	6.79196	6.22713	6.42797	6.33585	7.0223	6.75169	7.09257
ENSNFUG00015023908	C12ORF65	-0.854617	1	0.245189	0.902807	1.09981	0.302617		3.38794	3.80369	3.6894	3.03057	3.22565	3.11794	3.67042	4.28197	3.37284
ENSNFUG00015016035	HMGCRA	-0.742927	1	-1.65048	0.0542843	-0.907549	0.302994		8.12024	7.04565	9.10697	7.74585	7.82152	7.11713	7.0223	5.65424	7.06999
ENSNFUG00015013149	AKR1A1B	-0.345054	1	0.457652	0.710165	0.802706	0.303072		4.18824	4.18864	4.23533	3.74259	4.19208	3.83786	4.14748	4.87717	4.5932
ENSNFUG00015009884	GHRA	0.696348	1	0.0149336	0.99147	-0.681415	0.303345		4.54872	4.78072	4.29106	4.95947	5.27813	5.20046	4.72543	4.70469	4.23558
SLC38A5B	NA	0.746628	0.442108	1.19282	0.0012986	0.446193	0.303576		5.92884	5.86029	6.12959	6.77249	6.50086	6.77874	7.26393	6.91894	7.15828
ENSNFUG00015020058	CTNNBL1	0.306213	1	-1.06204	0.589342	-1.36825	0.303977		2.71968	3.64858	3.6894	3.62558	3.69199	3.63536	2	2.87017	3.37284
GADD45GA	NA	0.720344	1	2.00962	0.126743	1.28928	0.303977		6.56308	3.04797	4.79367	6.28616	6.0351	5.93342	8.21507	6.80962	6.2085
ZGC:63587	NA	0.154209	1	-0.725589	0.556674	-0.879799	0.304361		3.70658	4.39794	4.17737	4.37053	4.26085	4.17348	3.67042	3.55175	3.64142
ENSNFUG00015022615	Nfu_g_1_023239	-0.658566	1	0.119507	0.937975	0.778073	0.304707		5.02059	4.704	4.44638	3.9515	4.19208	4.3822	5.13695	4.98167	4.23558
ENSNFUG00015013892	CA4A	0.677135	1	-0.625139	0.782026	-1.30227	0.304707		2.40426	4.07137	4.39644	4.50912	4.56273	4.0966	2.39162	3.40912	4.06336
ENSNFUG00015011767	OTUB1B	-0.29888	1	0.280234	0.771201	0.579114	0.304707		5.54504	5.35794	5.22413	5.05307	5.27813	4.96127	5.71839	5.80427	5.3232
PKLR	NA	-0.888615	0.368909	-1.42627	0.000869486	-0.537653	0.306002		8.17938	7.85205	8.34177	7.25856	7.58049	6.87395	7.0223	6.36409	6.78118
ENSNFUG00015019509	NDUFAF4	-1.06598	0.496362	-0.369929	0.724251	0.696051	0.306002		5.28274	5.1993	4.94029	4.2172	4.11987	4.3822	4.85546	5.03121	4.52842
DAP	NA	0.434536	1	-0.125596	0.911214	-0.560132	0.306002		5.4628	5.5455	5.48529	5.86362	6.09283	5.71938	5.13695	5.21394	5.7212
ENSNFUG00015022284	RPL36	-0.283552	1	0.331131	0.747218	0.614684	0.306077		8.92253	7.60547	8.14034	8.0875	8.18664	7.82551	8.94546	8.4807	8.4666
ENSNFUG00015002160	CABZ01059390.1	-0.0793376	1	-0.841957	0.365873	-0.762619	0.306212		4.77006	6.11854	5.6857	5.33981	5.70571	5.64034	4.3375	4.98167	5.20382
ENSNFUG00015015118	PDHB	0.0721991	1	-0.496233	0.526863	-0.568432	0.306549		5.80078	6.35015	6.56213	6.4671	6.3824	6.19546	5.57475	5.65424	6.14509
ENSNFUG00015017940	TBC1D15	-0.56171	1	0.362025	0.814851	0.923735	0.307519		3.96742	3.80369	3.77005	3.35853	3.22565	3.74016	4.24562	4.1977	3.86776
ENSNFUG00015000020	COX2	-1.30587	0.894983	-0.289215	0.880452	1.01666	0.307765		14.4287	11.5818	11.9139	11.7956	12.0261	11.9662	13.2011	12.9819	12.5995
SNAPC5	NA	-0.713616	1	0.231541	0.89394	0.945157	0.307765		4.28715	3.64858	3.77005	3.20385	3.35711	3.63536	4.04218	4.01277	4.15204
ENSNFUG00015019899	CPSF3	0.315917	1	-0.621253	0.667696	-0.937169	0.307765		3.19764	4.34839	4.49464	4.57372	4.32649	4.31592	3.52165	3.55175	3.96887
ENSNFUG00015019998	UQCRC1	0.128535	1	-0.484584	0.579203	-0.613119	0.307765		6.10186	6.98209	6.99854	6.89131	6.88543	6.87395	5.99725	5.96586	6.76721
PPP5C	NA	-0.0137903	1	0.8927	0.444801	0.90649	0.307765		4.37971	4.4922	3.98804	4.2172	4.32649	4.31592	5.71839	5.03121	3.86776
KCTD10	NA	-0.291575	1	-1.7102	0.305984	-1.41862	0.308893		3.19764	4.95636	3.41626	3.9515	3.9636	3.74016	2	3.25084	3.37284
ENSNFUG00015015678	NFKBIAB	1.31903	0.533509	2.1134	0.00200739	0.794369	0.309205		4.46669	3.64858	4.54135	5.64052	5.27813	5.20046	6.41084	6.49344	5.07365
ENSNFUG00015005365	SLC39A9	0.493047	1	-0.540645	0.762075	-1.03369	0.309205		2.97836	4.39794	4.29106	4.37053	4.5072	4.44556	3.80526	2.87017	4.06336
ENSNFUG00015003444	CU469518.1	0.288812	1	-0.471144	0.697465	-0.759956	0.309205		4.46669	4.18864	4.79367	4.69484	4.71755	4.82495	3.92858	3.91058	4.46059
AHSA1	NA	0.0110562	1	-1.29568	0.443541	-1.30674	0.309205		2.71968	4.58069	3.41626	3.85083	3.87862	3.74016	2.69931	3.07302	3.21712
CNPPD1	NA	-0.078493	1	-1.33654	0.395136	-1.25805	0.309205		3.55604	3.80369	3.51316	3.74259	3.47758	3.52235	2	3.07302	3.21712
FKBP4	NA	-0.792332	1	-2.11646	0.0987849	-1.32413	0.309205		3.55604	4.74287	3.60397	3.49822	3.78832	3.2657	2.95278	2.87017	2.61347
ENSNFUG00015001790	PROX1	-0.71486	1	0.454913	0.822294	1.16977	0.309815		4.54872	2.77547	3.6894	3.20385	3.08101	3.63536	4.04218	4.43705	3.86776
TUBA8L3	NA	-0.693485	1	-1.35065	0.0232058	-0.657166	0.309815		7.29139	8.73975	8.32852	7.60613	7.60715	7.4617	6.60822	6.75169	7.30086
F5	NA	0.781452	0.99278	1.42537	0.0139236	0.643922	0.310015		7.10061	5.80626	6.26098	7.23877	6.95972	7.45402	8.12768	7.94746	7.42171
ENSNFUG00015007791	Nfu_g_1_017029	0.679383	1	-0.462427	0.832657	-1.14181	0.310266		3.38794	3.27709	3.20041	3.49822	3.78832	3.83786	3.1683	2.63405	3.21712
C8B	NA	1.55331	0.0341144	0.8791	0.254587	-0.674209	0.310943		7.92673	9.10865	9.62345	10.6979	10.3271	10.7206	9.77885	9.69639	10.2282
ENSNFUG00015019223	UBQLN4	0.427567	1	-0.4995	0.755069	-0.927067	0.310943		3.38794	4.78072	5.04124	5.05307	4.85736	4.96127	4.14748	3.55175	4.65519
FARSA	NA	-0.514875	1	0.039372	0.976147	0.554247	0.310991		5.80078	5.33268	5.55523	5.22383	5.0249	5.04549	5.53648	5.62227	5.63151
ENSNFUG00015002672	SSR1	-0.256367	1	-0.874293	0.187816	-0.617927	0.311277		5.28274	6.0112	5.96804	5.64052	5.75422	5.27213	5.08488	5.03121	4.93057
ENSNFUG00015011759	OLA.1317	-0.667069	1	-0.0442373	0.976091	0.622832	0.311649		5.28274	5.45477	5.33433	4.63555	5.0249	4.62049	5.45677	5.52186	4.93057
ENSNFUG00015000342	FABP2	-1.04407	0.882622	-0.239264	0.868089	0.804809	0.311705		6.28053	4.62297	5.5323	4.85937	4.44944	4.72634	5.61202	5.25622	5.28449
HPDA	NA	1.43756	0.0453863	0.798952	0.288989	-0.638604	0.31233		9.78948	10.9245	10.9722	12.1255	11.9668	12.1728	10.9854	11.2009	11.9763
ENSNFUG00015003712	SGPP1	0.164999	1	-1.41552	0.521035	-1.58052	0.312972		2.40426	4.53712	3.20041	4.04561	3.87862	3.39972	2	3.25084	3.04255
AR	NA	0.875233	1	-0.173716	0.939119	-1.04895	0.31304		2.71968	3.72822	3.51316	3.9515	4.04385	4.0966	2.95278	3.25084	3.64142
ENSNFUG00015023990	IER3IP1	-0.34025	1	0.106633	0.904234	0.446883	0.313054		7.00213	6.6348	6.78227	6.48401	6.62345	6.31903	7.08991	6.73683	6.88832
CSNK1A1	NA	0.275072	1	-0.211953	0.807394	-0.487025	0.313054		6.10186	6.70538	6.49253	6.7447	6.68731	6.75393	6.13166	6.11117	6.50635
GRB2B	NA	0.224747	1	-0.660359	0.616454	-0.885106	0.313054		3.55604	4.24388	4.29106	4.44149	4.11987	4.24646	3.67042	3.40912	3.75902
ENSNFUG00015013376	YIPF6	-0.431445	1	-1.3884	0.171841	-0.956953	0.313054		3.96742	5.92932	5.07338	4.80658	5.06391	4.62049	3.67042	4.3616	4.06336
CNIH4	NA	0.0575043	1	-0.86974	0.48594	-0.927244	0.313367		3.84289	5.05232	4.83175	4.91029	4.71755	4.56451	3.1683	4.57707	3.86776
ENSNFUG00015020693	TXNL4A	-1.41654	0.90193	-0.28351	0.888492	1.13303	0.313553		3.84289	4.74287	3.41626	2.83359	3.47758	3.11794	4.14748	3.91058	3.64142
ENSNFUG00015002770	BCKDHB	0.861146	1	0.0706529	0.970931	-0.790493	0.313553		3.96742	4.4922	4.23533	4.95947	4.94356	5.04549	3.80526	3.91058	4.93057
NIPSNAP1	NA	-0.612087	1	0.153335	0.918742	0.765422	0.313553		5.80078	5.14229	4.29106	4.80658	4.5072	4.62049	5.28277	5.3761	5.28449
ENSNFUG00015024541	CA16B	-0.454165	1	0.687375	0.694405	1.14154	0.313553		4.28715	3.27709	2.94649	3.35853	3.22565	3.2657	4.42388	4.1977	3.37284
METAP1	NA	0.353747	1	-0.8655	0.641426	-1.21925	0.313553		2.71968	5.33268	5.00837	4.85937	5.06391	5.20046	3.35577	3.40912	4.82664
ENSNFUG00015010357	CK2A2A	0.132925	1	0.669865	0.297245	0.536941	0.313553		5.23399	5.08293	5.41179	5.14098	5.43516	5.49815	5.78519	5.74612	6.03281
ENSNFUG00015010466	C19H1ORF109	0.200097	1	0.829121	0.253118	0.629024	0.313553		4.28715	4.74287	4.58659	4.95947	4.61621	4.62049	5.32828	5.07911	5.43346
NR5A5	NA	-0.328142	1	-1.21941	0.217264	-0.891268	0.313553		4.18824	4.704	5.72669	4.95947	4.71755	4.56451	3.92858	3.91058	4.23558
ENSNFUG00015016282	MEMO1	-1.54748	0.882622	-0.343737	0.863481	1.20374	0.314211		4.54872	4.1312	3.07903	3.20385	2.92022	2.9533	4.14748	3.68153	3.37284
ENSNFUG00015025398	JAK1	0.865643	1	0.0164135	0.99298	-0.84923	0.314211		4.28715	3.37931	4.05395	4.63555	4.26085	4.87184	4.04218	3.68153	4.06336
MTMR14	NA	0.166225	1	-0.885196	0.556499	-1.05142	0.314425		3.96742	4.00896	4.23533	3.9515	4.44944	4.17348	2.39162	3.25084	4.15204
ENSNFUG00015011179	OSBP	0.858014	1	-0.198927	0.928066	-1.05694	0.315747		2.97836	3.56429	3.60397	4.04561	3.9636	4.0966	2.95278	2.87017	3.86776
ENSNFUG00015013903	GMPS	0.900634	1	-0.293976	0.906523	-1.19461	0.315747		2.40426	3.56429	3.20041	3.62558	3.9636	3.63536	2.95278	3.07302	3.04255
ENSNFUG00015002312	CTDSP1	0.619414	1	-0.496418	0.809181	-1.11583	0.315758		3.84289	3.16708	3.31237	3.85083	3.78832	3.92936	2.69931	2.87017	3.64142
ENSNFUG00015014947	IMP3	-0.445269	1	0.127867	0.909791	0.573136	0.315822		5.37558	5.1993	5.16571	4.95947	4.71755	4.87184	5.32828	5.48678	5.24472
ENSNFUG00015022366	EIF2S3	-0.120928	1	0.366791	0.606338	0.48772	0.316113		5.76691	5.65144	5.93343	5.78394	5.52178	5.71938	6.18211	6.22199	5.98532
ENSNFUG00015005324	PCCA	0.0208272	1	-0.837031	0.46402	-0.857858	0.316113		4.08205	4.1312	4.29106	4.13395	4.11987	4.31592	3.35577	3.55175	3.75902
ENSNFUG00015019967	IRF9	0.362754	1	1.23498	0.222312	0.872222	0.317169		3.55604	3.27709	3.51316	3.35853	3.78832	3.83786	4.14748	4.64229	4.15204
B3GNT3	NA	0.992312	1	0.0639141	0.978266	-0.928398	0.318148		3.38794	3.80369	4.05395	4.50912	4.5072	4.67439	2.95278	3.68153	4.46059
ENSNFUG00015012860	LIFRA	1.61955	0.887948	0.404282	0.875722	-1.21527	0.318311		2.71968	2.43922	3.20041	3.74259	3.69199	3.83786	2.69931	2.87017	3.37284
ENSNFUG00015000499	MRPS15	-0.183788	1	0.301506	0.694405	0.485293	0.318538		6.07442	5.99519	5.80534	5.86362	5.86881	5.613	6.38953	6.30489	6.00926
ENSNFUG00015021870	OLA.2341	0.18793	1	1.14098	0.332211	0.953054	0.319036		3.55604	3.94373	3.31237	3.9515	3.58877	3.74016	5.13695	4.28197	3.75902
CCT8	NA	-0.634308	1	-0.0620608	0.961032	0.572247	0.319067		5.28274	5.58882	5.4612	4.91029	4.85736	4.91725	5.13695	5.58957	5.43346
LETM1	NA	0.733373	1	-0.464147	0.840224	-1.19752	0.319067		2.71968	3.56429	3.07903	3.74259	3.58877	3.63536	2.69931	3.07302	3.04255
ENSNFUG00015000612	AUP1 ENSNFUG00015000612	0.299643	1	-0.533695	0.69074	-0.833338	0.319067		3.55604	4.74287	4.86885	4.85937	4.76568	4.72634	4.24562	3.68153	4.31455
ENSNFUG00015017306	GLYR1	0.758068	1	-0.211524	0.917308	-0.969592	0.320264		2.97836	3.94373	3.77005	4.2172	4.19208	4.24646	3.1683	3.25084	3.96887
ENSNFUG00015020383	CYB561D2	-0.577999	1	0.343512	0.833914	0.921511	0.32029		4.08205	4.07137	3.6894	3.85083	3.47758	3.2657	4.65575	4.10819	3.75902
OAZ1B	NA	0.537954	1	-0.168762	0.906523	-0.706716	0.320653		5.98885	7.52413	7.59353	7.61383	7.82152	7.75222	6.47294	7.19372	7.32012
ENSNFUG00015019526	FAM69A	-0.282503	1	0.369221	0.730894	0.651724	0.320741		5.18352	5.08293	4.63045	4.7518	4.81224	4.62049	5.57475	5.41394	4.82664
ENSNFUG00015020971	C9ORF16	-0.66203	1	0.225529	0.895158	0.887559	0.320911		3.70658	4.18864	4.94029	3.74259	3.9636	3.92936	5.03085	4.3616	4.23558
PIK3CB	NA	0.190835	1	1.11656	0.331415	0.925722	0.320911		3.70658	2.91815	3.84643	3.62558	3.35711	3.92936	4.58252	4.1977	4.23558
ENSNFUG00015005502	RNASEK-C17ORF49	-0.992371	1	0.254183	0.913286	1.24655	0.320917		4.18824	3.04797	2.94649	2.83359	2.92022	2.9533	3.52165	3.68153	3.64142
ENSNFUG00015005737	SFXN2	0.688502	1	-0.454611	0.833914	-1.14311	0.320917		3.19764	4.98906	5.55523	5.41226	5.70571	5.37336	3.92858	3.40912	5.39763
ENSNFUG00015001780	OLA.27021	0.0915333	1	0.694777	0.359931	0.603243	0.320917		6.46085	5.1993	5.80534	6.12305	5.93344	5.86554	6.64465	6.45765	6.5396
ENSNFUG00015009375	NID1A	0.734091	1	-0.108064	0.957751	-0.842155	0.320937		3.70658	3.64858	3.84643	4.2959	4.44944	4.0966	3.67042	3.55175	3.75902
ENSNFUG00015010744	KIAA0907	-1.7967	1	-0.276008	0.922559	1.52069	0.320937		4.62633	2.91815	2.94649	2.83359	2.73925	2.55399	3.92858	3.55175	2.8439
ENSNFUG00015016326	CROT	0.841124	1	-0.285076	0.903058	-1.1262	0.320937		3.70658	3.72822	4.23533	4.37053	4.5072	4.82495	2.69931	2.87017	4.65519
PYROXD1	NA	-0.433511	1	0.518888	0.736981	0.952399	0.320937		4.18824	3.27709	3.60397	3.20385	3.47758	3.52235	4.14748	4.10819	3.96887
ENSNFUG00015014575	SYF2	-0.209284	1	0.408289	0.672904	0.617573	0.320937		6.48188	5.38276	5.57782	5.86362	5.46462	5.69351	6.13166	6.38329	6.24927
CDAB	NA	-1.03118	0.94721	-0.208967	0.900737	0.822215	0.321319		8.4752	8.62739	6.5846	7.27808	7.15303	6.94144	8.40225	7.9603	7.20047
PLXDC1	NA	0.275407	1	-0.83282	0.622233	-1.10823	0.321445		3.55604	3.87541	4.05395	4.04561	4.11987	4.01541	2.39162	2.87017	4.06336
ENSNFUG00015011057	HAX1	-0.473722	1	0.0986577	0.930774	0.572379	0.321487		5.28274	5.7878	5.98503	5.37649	5.27813	5.23674	6.10577	5.77549	5.53588
ENSNFUG00015016445	PSMD3	0.00903268	1	-0.749134	0.46402	-0.758167	0.321487		4.08205	5.30697	4.97473	5.00703	4.9848	4.72634	4.14748	4.3616	4.31455
ITGA9	NA	0.217026	1	1.27524	0.333081	1.05822	0.321487		3.38794	2.77547	3.07903	3.35853	3.08101	3.11794	4.14748	3.55175	3.86776
ENSNFUG00015022684	SLC16A4	-1.29035	1	-2.95509	0.0608043	-1.66474	0.321487		3.19764	4.58069	3.6894	3.03057	3.35711	2.9533	2	2.87017	2.3391
PROS1	NA	1.13659	0.393486	0.481139	0.658268	-0.655449	0.321685		4.46669	3.87541	4.44638	5.183	5.2102	5.30666	4.42388	4.57707	4.93057
ARPC1A	NA	-0.0367581	1	-0.74781	0.421392	-0.711052	0.322056		4.46669	5.73093	5.80534	5.51454	5.52178	5.27213	4.72543	4.82194	4.87954
ENSNFUG00015021886	ENPP2	0.619958	0.868961	0.162895	0.849977	-0.457063	0.322496		6.92743	6.29891	6.73282	7.18809	7.23223	7.37485	6.96583	6.59578	6.88832
FBP1B	NA	0.97307	0.116076	1.44237	0.000157374	0.469299	0.3229		10.2342	10.5658	9.57095	11.0681	11.094	11.2808	11.5551	11.6742	11.6263
STK38L	NA	-0.74652	1	0.412269	0.840224	1.15879	0.323553		4.18824	3.04797	3.20041	3.03057	2.92022	3.2657	4.14748	3.80059	3.37284
ENSNFUG00015008597	FAM210A	0.010993	1	-1.16735	0.46402	-1.17834	0.323553		2.40426	4.78072	4.39644	4.04561	4.38928	4.17348	3.35577	3.55175	3.21712
ENSNFUG00015004157	PSMA2	-0.0895347	1	-0.898711	0.387737	-0.809176	0.324009		4.08205	5.75014	5.84312	5.26353	5.49348	5.30666	4.72543	4.43705	4.77173
ENSNFUG00015023109	ASNS	-0.527864	1	-1.69936	0.184927	-1.1715	0.324009		3.38794	4.07137	5.50899	4.2959	4.32649	3.92936	3.1683	3.07302	3.75902
ENSNFUG00015020811	RNF185	-0.192606	1	0.604675	0.604364	0.797281	0.324248		4.37971	4.24388	3.60397	3.9515	3.9636	3.92936	4.24562	4.87717	4.52842
ENSNFUG00015015540	ARL6IP5B	0.0496083	1	0.699619	0.412305	0.650011	0.324248		4.69999	4.44584	5.00837	4.57372	4.56273	5.12505	5.28277	5.12546	5.60034
ENSNFUG00015011642	CNN2	-0.333632	1	-1.13002	0.207511	-0.796391	0.324248		4.69999	6.45921	5.86164	5.64052	5.75422	5.20046	4.50538	4.98167	4.97986
ENSNFUG00015006970	KIAA2013	0.626576	1	-0.726673	0.763058	-1.35325	0.324519		2	3.56429	3.77005	3.74259	3.78832	3.74016	2.69931	2.63405	3.37284
TRIM55A	NA	-0.108426	1	0.881805	0.525867	0.990231	0.324519		3.84289	3.27709	3.07903	3.35853	3.08101	3.52235	3.92858	3.80059	4.23558
ENSNFUG00015008386	HADH	-0.220069	1	0.277618	0.746161	0.497687	0.32453		6.78238	6.24577	6.11423	6.16559	6.16638	6.23186	6.90706	6.57922	6.47231
ENSNFUG00015001906	TGFBI ENSNFUG00015001906	0.859394	1	0.136951	0.928074	-0.722443	0.324648		3.84289	4.07137	4.39644	4.80658	4.94356	4.77649	4.04218	4.01277	4.5932
ENSNFUG00015003329	EXOC8	0.563002	1	-0.58184	0.778919	-1.14484	0.324648		2.71968	3.56429	3.51316	3.62558	3.78832	3.74016	3.1683	2.63405	3.21712
MMGT1	NA	-0.776471	1	-0.0205077	0.990894	0.755963	0.324899		4.96192	6.08868	4.86885	4.7518	4.71755	4.77649	5.45677	5.71614	4.97986
ENSNFUG00015017898	KIAA1919	0.0555555	1	-0.84631	0.502751	-0.901866	0.324899		3.55604	4.18864	4.29106	4.2172	4.19208	3.92936	3.35577	3.55175	3.51337
ENSNFUG00015007049	GPX1A ENSNFUG00015007049	-0.101923	1	-0.654932	0.338303	-0.553009	0.324899		5.76691	5.76909	6.0987	5.86362	5.73017	5.79431	4.97472	5.12546	5.66203
ENSNFUG00015010718	AP2S1	-0.544059	1	-1.21587	0.0660924	-0.671813	0.324899		5.4628	6.54967	6.50436	5.91439	5.89068	5.40558	5.13695	5.41394	4.82664
CTSC	NA	0.621344	1	-0.199731	0.906975	-0.821075	0.324903		3.84289	4.62297	4.86885	4.95947	5.2102	5.00399	3.67042	4.10819	4.97986
MIX23	NA	-0.313851	1	-1.3073	0.257099	-0.993447	0.325256		3.55604	4.95636	4.39644	4.2172	4.44944	3.83786	3.35577	3.80059	3.21712
C9	NA	1.83184	0.000513972	1.23599	0.0297826	-0.595852	0.325377		9.81664	10.686	11.1747	12.6786	12.1351	12.6044	11.6303	11.8068	12.194
SUB1B	NA	-0.802083	0.889201	-0.200209	0.85707	0.601875	0.325377		7.44923	6.31189	6.4194	5.96344	6.18419	5.97697	6.71486	6.56247	6.5721
ENSNFUG00015017932	GCSH	-0.454195	1	0.0140377	0.990079	0.468233	0.325377		9.36322	8.6091	8.50972	8.36809	8.42255	8.48725	8.78745	8.8861	8.99009
ENSNFUG00015016246	AASS	0.711891	1	0.0355494	0.983266	-0.676341	0.325377		4.08205	4.39794	4.23533	4.80658	4.81224	4.91725	4.42388	4.10819	4.31455
CENPS	NA	-0.843809	1	0.216559	0.917064	1.06037	0.325377		4.96192	3.27709	3.60397	3.35853	3.69199	3.39972	4.3375	4.43705	3.96887
PEX19	NA	0.467896	1	-0.331351	0.82867	-0.799247	0.325377		3.55604	5.08293	4.58659	5.09769	4.94356	4.87184	4.04218	4.43705	4.38941
ENSNFUG00015024123	GLDC	0.816008	1	1.5398	0.0287413	0.723789	0.325377		4.18824	5.2808	4.86885	5.81099	5.54954	5.40558	6.66252	6.49344	5.3609
ENSNFUG00015023542	NUP93	0.317159	1	-0.827089	0.646331	-1.14425	0.326731		2.71968	4.34839	3.60397	4.04561	4.26085	3.52235	3.35577	3.25084	3.04255
ENSNFUG00015020515	ITGB5	1.08315	1	0.140722	0.949372	-0.94243	0.326824		3.19764	4.07137	4.39644	4.85937	4.61621	5.12505	3.1683	3.91058	4.77173
ZGC:56622	NA	0.701039	1	-0.13037	0.944743	-0.831408	0.326824		3.96742	4.24388	3.91897	4.57372	4.94356	4.24646	3.52165	3.68153	4.46059
RNF114	NA	-0.375062	1	0.445779	0.749876	0.820841	0.326824		4.69999	3.47476	4.58659	3.9515	4.11987	4.01541	4.65575	4.57707	4.82664
ENSNFUG00015020894	SNIP1	-0.426517	1	0.455646	0.762075	0.882163	0.327147		4.18824	4.34839	3.60397	3.85083	3.58877	3.83786	4.85546	4.50876	3.75902
PIGR	NA	0.781751	1	1.49306	0.0384336	0.711304	0.327658		4.08205	3.87541	4.17737	4.63555	4.85736	4.50626	5.32828	5.74612	4.5932
ENSNFUG00015020113	SHDA	-1.09276	0.983355	-0.194486	0.909572	0.898275	0.328228		4.62633	4.00896	3.91897	3.49822	3.47758	3.2657	4.04218	4.01277	4.06336
ENSNFUG00015005071	Nfu_g_1_018506	0.0416654	1	-0.802992	0.498978	-0.844658	0.328331		4.08205	5.91237	5.22413	5.30218	5.54954	5.04549	4.3375	4.98167	4.31455
LPIN1A	NA	1.33858	1	2.67522	0.0626871	1.33664	0.329234		3.55604	2	2.80053	3.35853	3.22565	4.0966	5.45677	4.28197	3.51337
ENSNFUG00015009337	RABGGTB	-0.640268	1	0.27572	0.868089	0.915988	0.331043		3.70658	4.07137	3.6894	3.20385	3.47758	3.52235	4.24562	4.1977	3.64142
BCAS2	NA	0.300697	1	-0.583354	0.688026	-0.88405	0.331043		3.55604	4.78072	3.98804	4.63555	4.38928	4.3822	4.04218	3.40912	3.86776
HNRNPL2	NA	-0.35935	1	-1.36795	0.245212	-1.0086	0.331043		3.96742	5.47799	3.91897	4.2172	4.61621	4.24646	3.67042	3.68153	3.51337
RBP2B	NA	-0.103994	1	0.710033	0.552216	0.814027	0.331213		6.56308	5.61	4.44638	5.75637	5.57677	5.66717	6.5129	6.73683	5.93623
PPARDB	NA	1.18846	0.88042	0.326802	0.845921	-0.861655	0.332095		4.18824	3.37931	5.04124	5.30218	5.175	5.64034	4.04218	4.7645	4.93057
AQP12	NA	-0.687237	1	-1.70054	0.103028	-1.01331	0.332095		6.28053	5.1993	3.84643	4.80658	4.9011	4.67439	4.24562	3.80059	3.86776
ENSNFUG00015018960	ORLA-UAA	1.55352	0.140522	0.799341	0.430758	-0.754177	0.33214		7.59149	9.3194	9.37052	10.4179	10.5658	10.5346	8.93814	9.77484	10.261
ENSNFUG00015016990	MKNK2	2.02697	0.0957638	1.10242	0.374049	-0.924549	0.332456		4.37971	3.04797	5.07338	6.14447	5.75422	6.55281	5.23579	4.64229	5.8593
PSME2	NA	0.405757	1	-0.495551	0.759906	-0.901308	0.33263		3.84289	3.94373	4.05395	4.37053	4.38928	4.01541	2.69931	3.91058	3.86776
ENSNFUG00015009085	BX571880.1	6.32393	0.0511482	3.66477	0.268548	-2.65916	0.333086		2.71968	3.16708	2.45509	8.91797	3.08101	7.95636	5.23579	2	6.4197
ENSNFUG00015003471	FGB	1.40011	0.251876	0.665098	0.538973	-0.735014	0.333086		11.6872	12.9516	12.7089	13.849	13.8788	14.0905	12.4624	12.6021	14.0137
ENSNFUG00015006681	MRPL20	-0.591351	1	-0.0147036	0.990902	0.576647	0.333086		5.73222	6.23218	5.41179	5.37649	5.43516	5.04549	5.91015	5.88733	5.66203
PECR	NA	-0.380409	1	0.0750645	0.939085	0.455474	0.333086		6.60202	6.41175	6.15984	5.98735	6.07384	6.03991	6.27799	6.43942	6.6503
SI:CH211-284E20.8	NA	0.330646	1	-0.0850122	0.923444	-0.415658	0.333086		8.82302	8.92649	8.68635	8.9729	9.19878	9.24326	8.38081	8.64883	9.07476
ENSNFUG00015000331	RBPMS	-0.265396	1	0.436248	0.699402	0.701644	0.333086		4.69999	4.00896	4.49464	4.2959	4.19208	4.0966	4.58252	4.87717	4.82664
ENSNFUG00015005914	CTSBA	0.0473523	1	0.471219	0.399861	0.423866	0.333086		6.8159	6.62443	7.2012	6.90393	7.06923	6.86239	7.28716	7.36772	7.42171
TMEM258	NA	-1.08179	0.793969	-0.327118	0.814851	0.754668	0.333468		8.51656	6.88986	6.88543	6.53357	6.8745	6.31903	7.66069	7.23659	7.00004
ENSNFUG00015013607	HMGB1A ENSNFUG00015013607	0.00468489	1	0.457268	0.464721	0.452583	0.335001		7.23056	6.86365	7.11119	7.17773	7.18877	6.83898	7.85976	7.31869	7.31052
ENSNFUG00015019491	KNG1	0.825344	0.688242	0.281585	0.774625	-0.543759	0.335318		10.833	11.4905	11.5058	11.9997	12.194	12.1974	11.0135	11.4056	12.1255
PONZR2	NA	-4.00051	0.111753	-6.59842	0.00112397	-2.59791	0.33572		2.71968	3.80369	5.6857	2.33423	2.53227	2.30343	2	2	2
ENSNFUG00015021338	NSFL1C	0.0799953	1	-0.836945	0.535648	-0.91694	0.335833		3.38794	4.39794	4.29106	4.04561	4.44944	4.01541	3.52165	3.25084	3.75902
ENSNFUG00015000500	YWHAG1	-0.552219	1	-1.46975	0.133787	-0.917536	0.337572		3.84289	5.84251	5.00837	4.69484	4.71755	4.56451	3.80526	3.91058	4.06336
TRUB1	NA	-0.299989	1	0.312134	0.771201	0.612123	0.338285		4.77006	4.74287	4.71437	4.57372	4.38928	4.50626	4.85546	5.21394	4.93057
ENSNFUG00015014531	TMEM50A	-0.580439	1	0.00837764	0.99306	0.588816	0.3383		5.28274	5.05232	5.22413	4.7518	4.66777	4.62049	5.23579	5.41394	4.87954
ENSNFUG00015003779	MRPS18C	-0.387306	1	0.168827	0.875774	0.556133	0.3383		5.58447	5.25414	5.22413	4.80658	5.175	5.00399	5.71839	5.48678	5.28449
ENSNFUG00015020043	SLC2A8	-0.677754	1	0.389593	0.839605	1.06735	0.3383		3.55604	3.16708	3.51316	3.03057	2.73925	3.2657	3.67042	3.68153	3.64142
SDHC	NA	-0.258286	1	0.177073	0.833765	0.435359	0.3383		7.6669	7.06111	7.30636	7.00109	7.19757	7.11713	7.47084	7.3385	7.7547
TWF1A	NA	0.161364	1	-0.925835	0.570996	-1.0872	0.3383		2.97836	4.18864	3.6894	3.74259	3.9636	3.83786	3.35577	2.63405	3.37284
ENSNFUG00015003737	Nfu_g_1_010837	-0.432333	1	-1.45658	0.21051	-1.02424	0.3383		3.70658	4.24388	4.05395	3.62558	3.69199	3.83786	2.95278	3.40912	2.8439
ENSNFUG00015014877	STARD7	-0.734502	1	-2.22487	0.180272	-1.49036	0.3383		2.40426	5.17107	3.60397	3.49822	3.87862	3.52235	2.95278	2.63405	2.8439
ATG10	NA	0.078855	1	0.830783	0.41157	0.751928	0.338704		3.84289	3.87541	3.77005	3.85083	3.9636	3.83786	4.65575	4.1977	4.52842
ENSNFUG00015015977	CIB1	-0.751239	1	0.389607	0.848635	1.14085	0.339108		3.96742	3.16708	3.20041	3.03057	2.92022	3.11794	3.80526	4.10819	3.04255
ENSNFUG00015013621	DTYMK	-0.22385	1	0.419407	0.686931	0.643257	0.339108		4.46669	4.66405	4.54135	4.44149	4.32649	4.3822	4.72543	5.21394	4.77173
ENSNFUG00015019178	FKBP8	0.286839	1	-0.841315	0.641627	-1.12815	0.339108		2.40426	4.07137	3.91897	3.85083	3.9636	3.83786	3.35577	3.07302	3.04255
MRPS31	NA	-0.05898	1	-1.08602	0.435752	-1.02704	0.339486		3.19764	4.58069	4.17737	3.9515	4.44944	3.74016	2.95278	3.40912	3.64142
ATP5MD	NA	-0.865307	0.90193	-0.220372	0.857884	0.644935	0.339663		9.4932	8.07023	8.18146	7.87963	7.95722	7.79543	8.86669	8.32056	8.28244
ENSNFUG00015018465	GPD1A	1.11714	1	0.189119	0.92449	-0.92802	0.339663		5.18352	7.27511	7.20846	7.36278	7.78112	8.40993	5.9688	6.70666	7.77579
ENSNFUG00015008035	LUC7L	-0.672215	1	0.146021	0.928985	0.818236	0.340034		5.37558	4.39794	3.91897	4.04561	4.19208	4.0966	4.85546	4.93036	4.52842
ENSNFUG00015016311	COQ9	0.463005	1	-0.124705	0.92328	-0.587709	0.340405		4.62633	4.88864	4.83175	5.30218	5.1019	5.20046	4.65575	4.50876	4.87954
SLC28A1	NA	-0.181227	1	0.614667	0.609971	0.795894	0.340511		4.37971	3.47476	3.98804	3.85083	3.69199	3.92936	4.3375	4.43705	4.52842
ENSNFUG00015007253	POLR1E	-0.233606	1	-1.08841	0.304658	-0.854804	0.34115		4.77006	4.1312	4.05395	4.13395	4.26085	4.01541	3.52165	3.55175	3.51337
GCN1	NA	-0.809051	1	0.103087	0.959351	0.912138	0.341174		4.28715	3.80369	3.6894	3.49822	3.22565	3.39972	3.67042	4.28197	3.96887
ENSNFUG00015003443	ZNF330	0.0324365	1	-0.739178	0.507768	-0.771615	0.341377		3.96742	4.4922	4.79367	4.50912	4.44944	4.56451	4.14748	3.55175	3.96887
BCAS3	NA	-1.24408	1	-0.135895	0.957812	1.10819	0.341502		5.83388	3.80369	3.6894	3.74259	3.78832	3.83786	5.18722	4.43705	4.15204
CCT6A	NA	-0.114578	1	-0.748561	0.365289	-0.633983	0.341523		5.41985	6.7346	6.34236	6.14447	6.18419	6.1769	5.37239	5.33723	5.93623
ENSNFUG00015006109	SEC23A ENSNFUG00015006109	0.247944	1	-0.629772	0.663566	-0.877716	0.341811		3.84289	3.94373	3.91897	4.2172	4.04385	4.01541	3.1683	3.25084	3.86776
ENSNFUG00015019714	KAT8	-0.30051	1	0.565394	0.684432	0.865904	0.34238		3.96742	3.72822	3.6894	3.62558	3.47758	3.63536	4.65575	3.68153	4.15204
RPS6KB1B	NA	-0.124011	1	-1.24661	0.407144	-1.1226	0.342499		3.55604	4.1312	3.51316	3.62558	3.58877	3.83786	2.39162	2.87017	3.51337
ENSNFUG00015020612	NPC1	0.380304	1	-0.424693	0.775056	-0.804997	0.342631		4.28715	3.80369	4.49464	4.37053	4.5072	4.67439	3.80526	3.40912	4.31455
ENSNFUG00015001034	STRADA	-0.204652	1	-1.41673	0.365847	-1.21208	0.342631		3.38794	4.00896	3.20041	3.35853	3.47758	3.52235	2.69931	2.87017	2.8439
ENSNFUG00015011389	Nfu_g_1_019352	0.915303	0.903374	0.236114	0.857884	-0.679189	0.343251		6.35082	7.16493	6.7528	7.5749	8.16437	7.14603	6.25461	7.62331	6.87535
ENSNFUG00015019028	EIF2AK2	1.08871	1	-0.0549547	0.985071	-1.14366	0.343251		2.40426	3.37931	3.07903	3.62558	3.9636	3.52235	2.95278	3.25084	2.8439
ENSNFUG00015007558	Nfu_g_1_001907	0.926325	1	0.177014	0.912964	-0.749311	0.343251		4.54872	5.75014	6.20406	6.4671	6.54289	6.60924	5.37239	5.3761	6.45498
ENSNFUG00015006269	CABZ01033130.1	0.341458	1	-0.590236	0.712923	-0.931694	0.343352		3.55604	3.94373	4.39644	4.37053	4.26085	4.24646	3.1683	3.07302	4.23558
SARDH	NA	-0.00265028	1	0.85893	0.480848	0.861581	0.343647		4.28715	3.37931	3.77005	3.74259	3.87862	3.83786	4.97472	4.43705	3.86776
ENSNFUG00015018152	LHX9	0.209908	1	1.22401	0.363405	1.0141	0.344476		3.38794	3.04797	2.80053	3.03057	3.22565	3.2657	4.04218	3.55175	3.86776
ENSNFUG00015022562	MOCS3	-1.10127	1	-0.0890772	0.970483	1.01219	0.344834		5.02059	3.47476	3.77005	3.74259	3.22565	3.2657	4.14748	4.1977	4.06336
ENSNFUG00015011868	PYCR1	-0.632953	1	0.225344	0.894622	0.858297	0.344891		4.28715	4.00896	3.6894	3.9515	3.35711	3.2657	4.14748	4.28197	4.06336
ENSNFUG00015004867	HSPD1	-0.617173	1	-1.77297	0.165094	-1.1558	0.345252		2.97836	4.53712	4.44638	3.62558	3.9636	3.52235	2.69931	3.07302	3.21712
ENSNFUG00015014438	DUSP2	-1.65529	1	-0.231998	0.934797	1.42329	0.345361		2.40426	4.88864	3.20041	3.03057	3.08101	2.55399	3.52165	4.01277	3.64142
B3GNT7L	NA	0.615726	1	-0.434349	0.839158	-1.05008	0.345552		2.97836	3.94373	3.20041	3.9515	3.87862	3.83786	2.69931	3.40912	3.37284
DPYS	NA	0.704545	1	-0.153865	0.934797	-0.858409	0.345556		3.84289	5.05232	5.13558	5.41226	5.34301	5.52773	4.42388	3.68153	5.39763
ENSNFUG00015016614	LAPTM4A	0.540859	1	0.970226	0.0217384	0.429366	0.345556		5.83388	6.19061	6.32911	6.67279	6.51501	6.77874	7.17955	7.1718	6.84907
CLPX	NA	0.595354	1	-0.191238	0.911214	-0.786592	0.34581		4.18824	3.72822	4.34471	4.37053	4.66777	4.67439	3.35577	4.01277	4.31455
HM13	NA	-0.356852	1	-0.994345	0.155805	-0.637493	0.34581		5.02059	5.25414	5.13558	4.95947	4.76568	4.77649	4.14748	4.10819	4.5932
ERCC2	NA	-1.3541	1	-0.148179	0.95591	1.20592	0.346438		4.96192	3.04797	3.41626	3.03057	3.22565	3.11794	4.04218	3.40912	4.15204
HPCAL1	NA	-1.1244	1	-2.40912	0.0594387	-1.28471	0.346438		4.08205	4.98906	3.41626	3.49822	3.58877	3.39972	2.69931	2.35158	3.21712
DCTN5	NA	-0.216287	1	-1.4074	0.36382	-1.19111	0.346598		3.38794	3.72822	3.60397	3.20385	3.58877	3.52235	3.1683	2.35158	2.8439
ENSNFUG00015015362	ACOT13	-0.941836	1	0.0527571	0.982229	0.994593	0.346973		4.54872	3.56429	3.6894	3.49822	3.47758	2.9533	3.80526	4.43705	3.64142
ENSNFUG00015002746	ECH1	-0.0218885	1	-0.697477	0.46402	-0.675588	0.346973		4.46669	5.33268	5.28028	5.05307	5.1019	5.08582	4.14748	4.3616	4.87954
ALDH8A1	NA	0.545324	1	-0.0189723	0.989195	-0.564297	0.347071		7.24293	7.69739	7.09563	7.80086	7.98289	7.92335	6.86136	6.94503	7.96514
ENSNFUG00015001804	PERP	0.360486	1	-0.229792	0.842802	-0.590277	0.347071		5.62285	6.7346	6.65	6.91644	6.81857	6.56712	5.78519	6.20049	6.5396
ENSNFUG00015010866	C8H17ORF59	-0.0936372	1	0.747133	0.552216	0.84077	0.347553		3.84289	3.64858	3.6894	3.74259	3.58877	3.63536	3.92858	4.7645	3.96887
ENSNFUG00015003545	BAG2 ENSNFUG00015003545	-0.481946	1	-1.29011	0.146282	-0.808168	0.347553		4.18824	5.5455	4.94029	4.69484	4.71755	4.3822	3.67042	4.10819	4.06336
ENSNFUG00015023379	OLA.8803	0.580969	1	-0.031955	0.984022	-0.612924	0.350049		4.77006	5.08293	5.16571	5.37649	5.40509	5.81845	4.65575	4.70469	5.46841
ENSNFUG00015018737	MNAT1	-0.703681	1	0.34084	0.857625	1.04452	0.350049		3.70658	3.64858	3.07903	3.03057	3.22565	2.9533	4.04218	3.68153	3.37284
ENSNFUG00015016821	GPR39	0.347676	1	-0.703893	0.697465	-1.05157	0.350049		3.19764	4.34839	3.41626	3.85083	4.26085	3.92936	2.69931	3.25084	3.75902
HNRNPR	NA	-0.199255	1	0.438256	0.679052	0.637511	0.350049		5.28274	5.76909	5.00837	5.26353	5.1019	5.27213	6.301	5.68552	5.20382
ENSNFUG00015002429	RETSAT	0.134747	1	-0.767471	0.582668	-0.902218	0.350049		3.38794	4.1312	4.39644	4.13395	4.26085	4.0966	2.95278	3.80059	3.64142
ENSNFUG00015015087	CLIC4	-0.00855783	1	-1.32466	0.485352	-1.3161	0.350049		2.71968	4.95636	4.11698	4.2172	4.5072	3.83786	2	3.55175	3.75902
CRY1	NA	0.0946737	1	1.36045	0.441823	1.26577	0.350049		3.70658	2.23626	2.80053	2.83359	2.73925	3.39972	4.04218	3.91058	3.37284
ENSNFUG00015004250	EHD1	-0.0838671	1	-1.27964	0.441155	-1.19577	0.350049		2.71968	4.53712	3.51316	3.85083	3.87862	3.52235	3.1683	2.87017	3.04255
ENSNFUG00015004709	YWHAB	-0.0536041	1	-0.681018	0.433634	-0.627414	0.350049		5.92884	7.26179	7.11891	6.8397	6.98026	6.67681	5.75218	6.28461	6.55594
ENSNFUG00015000701	TMED9	-0.258821	1	-0.849678	0.234195	-0.590857	0.350156		6.48188	7.58956	7.49019	7.08104	7.26608	6.65016	6.13166	6.36409	6.78118
MRPS27	NA	-0.255903	1	0.383497	0.729853	0.6394	0.350294		4.96192	4.34839	4.83175	4.57372	4.66777	4.24646	5.18722	5.17038	4.77173
MFGE8B	NA	1.26348	1	0.111645	0.971034	-1.15183	0.350467		2.97836	3.16708	3.20041	3.85083	4.04385	3.92936	2	3.07302	3.86776
ENSNFUG00015022429	Nfu_g_1_017698	-0.512486	1	0.314459	0.84521	0.826945	0.3509		4.83689	6.72492	5.60005	5.48124	5.62973	5.27213	6.45253	6.64434	5.28449
CDC27	NA	0.300397	1	-0.74667	0.672102	-1.04707	0.3509		3.70658	3.47476	3.41626	3.85083	3.69199	3.63536	2.39162	3.40912	3.21712
ENSNFUG00015008712	FAM114A1	-0.315266	1	-1.27132	0.281591	-0.956053	0.3509		4.18824	3.87541	4.11698	3.85083	3.87862	3.74016	2.95278	2.87017	3.64142
ENSNFUG00015015910	Nfu_g_1_021746	-0.631985	1	-2.02744	0.217264	-1.39546	0.351371		2.71968	4.704	3.41626	3.35853	3.69199	3.2657	2.69931	2.87017	2.61347
ENSNFUG00015003639	TRIB2	-1.19104	1	0.0562257	0.98435	1.24726	0.351482		3.84289	4.18864	2.94649	3.03057	3.22565	2.76742	4.58252	3.25084	3.04255
ENSNFUG00015014046	CHMP4B	0.437034	1	-0.557663	0.763058	-0.994698	0.351482		2.97836	4.1312	4.05395	4.37053	4.26085	3.83786	2.69931	3.55175	3.86776
ENSNFUG00015019878	CK2A2B	-0.107041	1	1.02317	0.54397	1.13022	0.351482		3.38794	2.77547	2.94649	3.20385	2.73925	2.9533	4.04218	3.40912	3.37284
SDHAF2	NA	-0.465725	1	0.0853704	0.944743	0.551095	0.351689		5.41985	5.11292	5.25248	4.91029	4.85736	4.77649	5.03085	5.41394	5.50254
ENSNFUG00015000026	ND3	-1.37483	0.832755	-0.43274	0.810588	0.942086	0.351841		10.5452	8.07785	8.18514	7.92985	8.40746	7.75222	9.44624	9.11011	8.09943
ENSNFUG00015003553	SRSF1	-0.732502	1	0.0498313	0.979454	0.782333	0.351841		4.28715	4.34839	4.17737	3.85083	3.87862	3.39972	4.24562	4.64229	3.96887
ENSNFUG00015017490	FRA10AC1	-0.420448	1	0.255496	0.84521	0.675943	0.351841		5.83388	4.53712	5.00837	4.85937	4.9848	4.62049	5.61202	5.25622	5.39763
ENSNFUG00015016024	LOH12CR1	0.667828	1	-0.552005	0.822294	-1.21983	0.351841		2.71968	3.16708	3.60397	3.74259	3.35711	3.83786	2.39162	2.63405	3.51337
ENSNFUG00015011515	ZC4H2	-0.417803	1	0.365923	0.797322	0.783725	0.351841		4.08205	3.94373	3.84643	3.62558	3.58877	3.74016	4.42388	4.01277	4.23558
ENSNFUG00015014807	TYW5	-0.253972	1	0.579011	0.66578	0.832983	0.351841		4.08205	3.56429	3.51316	3.49822	3.47758	3.63536	4.14748	4.10819	4.15204
RAB18A	NA	-0.187263	1	-1.06929	0.359646	-0.882022	0.351841		3.70658	5.22698	4.29106	4.37053	4.61621	4.24646	3.80526	3.80059	3.64142
ENSNFUG00015000970	PCGF6	-0.301023	1	-1.10982	0.263182	-0.808794	0.351841		3.96742	4.8176	5.00837	4.2959	4.66777	4.31592	3.52165	3.68153	4.15204
RSL1D1	NA	-0.360241	1	-1.17684	0.231188	-0.816599	0.351841		4.08205	5.67173	5.04124	4.7518	4.71755	4.87184	4.50538	3.80059	3.96887
ENSNFUG00015025400	AK4	0.449874	1	0.990573	0.0983473	0.540699	0.351841		4.69999	4.53712	4.54135	4.95947	4.85736	5.08582	5.23579	5.48678	5.60034
RAP1AB	NA	-0.0134355	1	-0.702239	0.480848	-0.688803	0.35227		4.62633	5.67173	4.90501	5.09769	5.27813	5.04549	4.14748	4.82194	4.5932
SERPINA10	NA	1.23047	0.195589	0.629736	0.467268	-0.60073	0.352574		7.19279	8.47413	8.26384	9.17121	9.30233	9.40939	8.2029	8.49842	9.21
ENSNFUG00015016372	Nfu_g_1_016703	-0.50227	1	0.293515	0.845735	0.795784	0.352574		4.08205	4.44584	3.91897	4.04561	3.69199	3.63536	4.85546	4.10819	4.15204
ENSNFUG00015016975	EIF2AK3	0.307345	1	-0.750196	0.677197	-1.05754	0.352574		3.70658	4.18864	2.94649	4.04561	3.87862	3.83786	3.67042	3.07302	2.8439
CAPZA1B	NA	0.144022	1	-0.481086	0.637824	-0.625108	0.352574		4.77006	5.5455	5.41179	5.37649	5.34301	5.55672	4.3375	4.87717	5.24472
ENSNFUG00015002291	PIGH	-0.108716	1	-1.28583	0.428795	-1.17711	0.352574		2.71968	3.80369	3.91897	3.62558	3.58877	3.39972	2.69931	2.87017	3.04255
PSMC4	NA	-0.103677	1	-0.94734	0.419005	-0.843663	0.352574		3.84289	4.98906	5.5323	4.95947	5.0249	4.62049	4.65575	3.80059	3.96887
ENSNFUG00015013284	SCD	-1.04711	1	-2.96347	0.174775	-1.91636	0.352574		2.40426	3.37931	4.90501	3.74259	3.08101	2.76742	2	2	3.04255
RAB11BA	NA	-0.810934	1	-0.0296667	0.987441	0.781268	0.352748		4.54872	4.44584	3.98804	3.62558	3.47758	4.01541	4.24562	4.50876	4.15204
ENSNFUG00015000033	ND5	-0.612885	1	0.256579	0.889091	0.869464	0.352748		9.88928	7.34625	7.89718	8.0652	8.32154	8.2146	9.39637	9.18863	8.44921
PRKAA1	NA	0.408797	1	-0.499201	0.771201	-0.907999	0.352748		4.37971	3.72822	3.60397	4.2959	3.87862	4.44556	3.1683	3.25084	4.06336
ENSNFUG00015003816	METTL18	-0.333174	1	0.70937	0.675463	1.04254	0.352748		2.97836	3.72822	3.07903	3.35853	3.08101	2.9533	3.92858	4.01277	3.37284
ENSNFUG00015024148	OAT	2.9282	0.000373963	2.04985	0.0197253	-0.878348	0.352815		4.18824	6.66547	4.75457	8.33586	8.29719	8.684	7.20416	7.27822	8.09384
SDF2L1	NA	-0.683183	0.597617	-0.265742	0.712499	0.417441	0.352815		8.38875	7.97957	7.73084	7.49376	7.4017	7.2473	7.97868	7.67097	7.71159
LSM14AB	NA	0.806138	1	-0.0519552	0.981837	-0.858093	0.352815		2.97836	4.07137	4.44638	4.50912	4.71755	4.67439	3.35577	4.01277	4.31455
ENSNFUG00015024263	CHMP7	-0.627921	1	0.186812	0.912333	0.814733	0.352815		4.83689	3.94373	4.05395	3.74259	3.69199	4.01541	3.92858	4.50876	4.77173
ENSNFUG00015020005	PIN4	-0.405943	1	0.154965	0.894128	0.560908	0.352815		5.28274	4.9229	5.04124	4.50912	4.85736	4.77649	5.13695	5.21394	5.28449
ENSNFUG00015004216	DTNB	-0.645175	1	0.376381	0.845735	1.02156	0.352815		4.62633	3.27709	3.20041	3.35853	3.22565	3.52235	4.24562	4.1977	3.75902
ENSNFUG00015012231	ATP5S	-0.4733	1	0.281223	0.84521	0.754523	0.352815		4.83689	4.00896	4.05395	4.04561	3.9636	3.83786	4.65575	4.70469	4.23558
ENSNFUG00015024224	KRAS	0.319024	1	-0.271888	0.814851	-0.590912	0.352815		4.62633	5.50085	5.04124	5.44716	5.43516	5.3404	4.72543	4.82194	5.07365
C1GALT1C1	NA	0.333085	1	-0.547605	0.73141	-0.88069	0.352885		3.19764	5.02103	4.17737	4.69484	4.56273	4.62049	3.67042	4.01277	4.06336
ENSNFUG00015003121	PPM1G	0.150349	1	-1.08263	0.573276	-1.23298	0.353672		2.40426	4.58069	3.41626	3.74259	4.11987	3.74016	3.35577	2.87017	3.04255
ENSNFUG00015008230	ELL2	0.663874	1	-0.256484	0.901499	-0.920359	0.354463		2.97836	3.87541	3.51316	4.04561	4.04385	3.92936	3.1683	3.40912	3.51337
ENSNFUG00015011434	TEX10	0.109815	1	-0.991608	0.558963	-1.10142	0.354463		2.71968	4.00896	3.6894	3.62558	3.78832	3.63536	2.95278	2.87017	3.21712
ENSNFUG00015006216	NDUFB11	-0.579197	1	0.0569938	0.972274	0.63619	0.354508		7.7121	6.36269	6.46856	6.28616	6.58373	6.36891	7.37652	6.85159	6.79501
ENSNFUG00015002483	CU695232.1	0.362211	1	-0.127719	0.904912	-0.48993	0.354508		5.76691	6.39964	6.55076	6.54972	6.63645	6.71588	6.07939	5.94016	6.43745
SAYSD1	NA	-0.459356	1	0.499802	0.769061	0.959158	0.3556		3.70658	3.47476	3.20041	3.03057	3.35711	3.11794	3.92858	3.68153	3.75902
GGNBP2	NA	0.0450467	1	0.877364	0.46402	0.832317	0.355734		3.55604	3.56429	3.51316	3.35853	3.69199	3.63536	4.42388	4.28197	3.75902
ENSNFUG00015010231	PDCD4B	-0.435203	1	0.370886	0.807573	0.806089	0.356155		5.23399	4.1312	4.05395	4.04561	4.04385	4.44556	4.50538	4.57707	5.3232
ENSNFUG00015016118	GTF2H2	0.354731	1	-0.809669	0.688441	-1.1644	0.356155		2.71968	3.94373	3.20041	3.49822	3.87862	3.52235	3.1683	3.07302	2.61347
ENSNFUG00015009715	GPBP1L1	0.0838374	1	-0.879517	0.555077	-0.963354	0.356155		3.55604	3.56429	3.91897	3.74259	3.78832	3.74016	2.95278	3.25084	3.21712
AIP	NA	0.545488	1	-0.584964	0.790113	-1.13045	0.357789		2.71968	3.64858	3.77005	3.85083	3.69199	4.01541	2.39162	2.87017	3.75902
ENSNFUG00015023257	AP1S2	-0.0394113	1	-0.999996	0.471685	-0.960585	0.357789		3.55604	4.18864	3.6894	3.9515	3.69199	3.83786	2.95278	3.07302	3.51337
PDZD11	NA	0.163752	1	-0.973901	0.589732	-1.13765	0.358813		2.40426	4.1312	3.84643	3.85083	3.78832	3.74016	2.69931	3.25084	3.21712
DRG2	NA	-0.0583599	1	-0.935203	0.459012	-0.876843	0.359417		3.96742	4.74287	3.84643	4.04561	4.38928	4.17348	3.67042	3.07302	3.86776
ENSNFUG00015009123	ADOA	0.270077	1	-0.762074	0.664474	-1.03215	0.359443		3.19764	4.18864	3.60397	3.85083	4.11987	3.83786	2.39162	3.68153	3.37284
ENSNFUG00015012866	MRPL45	0.180484	1	-0.491161	0.66578	-0.671646	0.359547		4.46669	5.43116	5.55523	5.48124	5.34301	5.40558	4.14748	5.07911	5.02752
ENSNFUG00015006405	MYL12.2	-0.372055	1	-0.0524341	0.943147	0.319621	0.360033		7.8234	7.96731	7.93703	7.64423	7.53262	7.4617	7.84418	7.87469	7.86375
SEC14L1	NA	-1.7445	1	-0.367408	0.893943	1.37709	0.360276		5.07697	2.91815	2.94649	3.03057	2.53227	3.11794	4.04218	3.40912	3.64142
ENSNFUG00015018271	CSRP1A	-0.428947	1	-1.47047	0.248824	-1.04152	0.360276		4.28715	4.07137	3.98804	3.9515	3.87862	3.52235	2	3.25084	3.64142
ENSNFUG00015008473	ATPIF1B	-0.820325	0.90193	-0.2342	0.840224	0.586124	0.360655		7.45987	6.23218	6.34236	5.93912	6.13007	5.91115	6.58965	6.56247	6.50635
CTSA	NA	0.388866	1	-0.689481	0.727922	-1.07835	0.360855		2.97836	3.27709	3.60397	3.62558	3.47758	3.63536	2.95278	2.87017	3.04255
KMO	NA	0.467531	0.987955	0.814355	0.0198885	0.346825	0.361544		7.2552	6.99824	7.01519	7.54299	7.53262	7.55803	7.89042	8.03506	7.71159
ENSNFUG00015005231	QKIA	-0.397041	1	0.301452	0.826724	0.698494	0.361544		5.69668	4.18864	5.00837	4.80658	4.56273	4.77649	5.37239	5.17038	5.43346
ENSNFUG00015014587	OLA.5441	0.228318	1	0.736163	0.251596	0.507845	0.361544		5.4628	5.1993	5.04124	5.37649	5.49348	5.4371	6.23085	5.58957	5.83272
ENSNFUG00015021252	USP24	-0.748024	1	0.182689	0.925842	0.930713	0.361566		5.18352	4.00896	3.84643	4.13395	3.78832	3.63536	5.23579	4.3616	3.86776
SURF1	NA	-0.245732	1	0.383975	0.733	0.629707	0.361566		4.96192	4.44584	4.39644	4.13395	4.5072	4.50626	4.97472	4.7645	5.02752
ENSNFUG00015011204	C1ORF43 ENSNFUG00015011204	-0.498405	1	0.239212	0.86841	0.737617	0.362237		4.69999	3.80369	4.34471	3.85083	3.9636	3.92936	4.50538	4.64229	4.31455
EPB41L3B	NA	0.544101	1	-0.538234	0.80424	-1.08233	0.362504		3.38794	3.16708	3.20041	3.62558	3.35711	3.74016	2.95278	2.63405	3.21712
PTBP1B	NA	-0.204483	1	0.738155	0.625497	0.942638	0.362504		4.08205	3.04797	3.31237	3.20385	3.35711	3.52235	4.24562	4.10819	3.64142
ENSNFUG00015018355	TRIQK	-0.144916	1	0.563889	0.620457	0.708804	0.362504		4.08205	4.00896	4.23533	3.85083	4.04385	4.0966	4.58252	4.87717	4.15204
ENSNFUG00015004793	BPNT1	-0.201396	1	-1.33084	0.391886	-1.12944	0.362504		2.71968	4.00896	4.05395	3.62558	3.78832	3.39972	2.95278	2.87017	3.04255
AGT	NA	0.782609	0.882622	0.244791	0.821523	-0.537818	0.36333		7.93438	8.28955	8.492	8.92108	8.88694	9.26098	7.94256	8.16835	9.10839
ENSNFUG00015016568	CDC34B	0.419976	1	-0.652443	0.749876	-1.07242	0.36333		3.19764	3.37931	3.31237	3.35853	3.78832	3.52235	2.69931	3.07302	3.04255
MED29	NA	0.0373737	1	-1.14575	0.529601	-1.18313	0.36333		2.71968	3.87541	3.60397	3.62558	3.58877	3.39972	2.39162	3.25084	2.8439
ENSNFUG00015003001	WDR83OS	-0.631294	1	-0.145051	0.885737	0.486243	0.363611		6.39584	6.10369	6.01843	5.51454	5.77788	5.4371	5.81746	6.34463	5.8854
SPTLC2B	NA	-0.160096	1	-1.23348	0.412558	-1.07338	0.363611		3.38794	3.72822	4.11698	3.49822	3.87862	3.63536	3.52165	2.35158	3.04255
ENSNFUG00015017914	HBP1	1.27006	0.942027	0.35097	0.85433	-0.919087	0.364444		4.54872	2.77547	4.67302	5.41226	4.61621	5.613	4.24562	4.3616	4.77173
ENSNFUG00015015520	RFXAP	-1.04444	1	0.0770817	0.977329	1.12152	0.364444		3.19764	3.94373	3.07903	2.60541	3.08101	2.9533	3.52165	3.55175	3.51337
STRA6L	NA	-0.0133444	1	-0.541862	0.491556	-0.528518	0.364653		5.69668	5.25414	5.70634	5.48124	5.68082	5.46795	4.91632	4.93036	5.3232
ENSNFUG00015019104	TECRB	-0.57809	1	-1.07173	0.0330322	-0.493643	0.364653		6.84866	6.88117	7.3265	6.54972	6.67476	6.1769	5.81746	5.77549	6.36509
ODC1	NA	-2.86973	1	-6.47783	0.0999443	-3.6081	0.365001		2	5.84251	2.63813	2.83359	2.92022	2.30343	2	2	2
ENSNFUG00015015575	PSMB2	-0.866402	0.594781	-0.343408	0.698084	0.522994	0.365764		6.39584	5.80626	5.98503	5.37649	5.27813	5.16325	5.4152	6.04034	5.7212
ENSNFUG00015000007	ND1	-0.916823	1	-0.146753	0.93123	0.77007	0.365764		10.9039	9.10865	8.97071	8.86087	9.3326	8.86871	10.1427	9.98586	9.06908
ENSNFUG00015006857	VPS4B	1.00091	1	0.046229	0.985121	-0.954683	0.365779		3.19764	3.16708	3.20041	3.9515	3.47758	4.01541	3.1683	3.25084	3.21712
ENSNFUG00015001617	MRPL11	-0.42882	1	0.0747166	0.949372	0.503536	0.365779		5.98885	5.58882	5.62194	5.33981	5.34301	5.3404	6.10577	5.77549	5.46841
ALG1	NA	-0.169667	1	0.661941	0.621381	0.831608	0.365779		3.84289	3.37931	3.84643	3.49822	3.47758	3.74016	4.58252	4.01277	3.86776
ENSNFUG00015016229	CSTF1	-0.131456	1	-0.838848	0.393836	-0.707392	0.365779		4.18824	5.11292	4.83175	4.63555	4.94356	4.3822	4.04218	4.10819	4.15204
ENSNFUG00015007457	Nfu_g_1_005742 ENSNFUG00015007457	-0.967125	0.91359	-0.269148	0.844772	0.697977	0.366493		6.32777	5.40716	5.13558	4.95947	4.85736	4.67439	5.78519	5.62227	4.77173
FSTL1B	NA	0.713485	1	-0.0149349	0.99303	-0.72842	0.366493		3.96742	4.29708	4.63045	4.91029	4.9011	5.00399	4.24562	3.55175	4.87954
AGLA	NA	0.143365	1	-0.493686	0.646284	-0.637051	0.366493		5.23399	4.44584	4.79367	5.09769	4.81224	4.96127	4.58252	4.50876	4.15204
PEX2	NA	0.247013	1	-0.927563	0.638955	-1.17458	0.366493		2.71968	3.56429	3.60397	3.74259	3.69199	3.11794	2.69931	3.25084	2.61347
ENSNFUG00015023207	LGALSLA	-0.192305	1	-1.03745	0.370273	-0.845142	0.366493		4.18824	4.88864	5.16571	4.44149	4.5072	4.96127	3.1683	3.68153	4.65519
DDX46	NA	-0.465744	1	0.360797	0.826724	0.826541	0.368172		5.5045	3.87541	4.11698	4.2959	4.32649	4.17348	5.18722	5.07911	4.52842
ENSNFUG00015014283	COX20	-0.46722	1	0.248916	0.858497	0.716136	0.369148		4.46669	4.29708	4.29106	4.2172	3.87862	3.83786	4.79191	4.7645	3.96887
ENSNFUG00015008937	SLC25A20	-0.216006	1	-0.901681	0.327295	-0.685675	0.369148		4.83689	6.33751	5.50899	5.51454	5.62973	5.37336	5.18722	4.57707	4.87954
ENSNFUG00015008969	ECI2	-0.380624	1	-1.181	0.233701	-0.800374	0.369148		3.84289	5.05232	5.10482	4.37053	4.76568	4.24646	3.67042	4.01277	3.86776
ENSNFUG00015006324	Nfu_g_1_015619	0.387525	1	-0.1812	0.882083	-0.568726	0.370068		5.98885	6.4938	6.71255	6.81319	6.77221	6.83898	5.57475	6.08794	6.83574
ENSNFUG00015010190	PEX16	0.0763992	1	0.756424	0.444801	0.680025	0.370328		4.37971	3.94373	4.29106	4.2172	4.44944	4.0966	4.42388	5.25622	4.65519
SNX2	NA	0.452651	1	-0.62819	0.764298	-1.08084	0.371001		2.97836	3.16708	3.60397	3.62558	3.47758	3.63536	2.95278	2.63405	3.21712
UPF3B	NA	0.276657	1	1.03256	0.315934	0.755904	0.371001		3.38794	3.47476	3.6894	3.62558	3.78832	3.74016	4.42388	4.28197	4.15204
ENSNFUG00015014332	DNAJC10	0.591371	1	-0.383006	0.851369	-0.974377	0.371304		2.97836	3.47476	3.84643	3.85083	3.9636	3.92936	3.35577	2.63405	3.64142
ENSNFUG00015007183	MED4	-0.449798	1	0.493776	0.777148	0.943573	0.371527		2.97836	3.94373	3.51316	3.49822	3.22565	3.11794	4.24562	3.80059	3.64142
POLR2I	NA	-0.478057	1	0.254945	0.858497	0.733002	0.372033		4.28715	4.1312	4.23533	3.74259	3.9636	3.83786	4.3375	4.82194	3.96887
CLDN3C	NA	-0.417848	1	0.555788	0.755069	0.973636	0.372647		3.38794	3.72822	3.31237	3.62558	3.22565	2.76742	4.24562	3.91058	3.37284
U2	NA	-3.92265	0.124717	-2.12299	0.327486	1.79966	0.372735		6.30435	2.43922	3.6894	2	2.92022	2.55399	3.35577	3.80059	2.8439
ENSNFUG00015021593	PLP2	-0.669952	1	0.40614	0.845735	1.07609	0.373132		4.28715	3.04797	3.07903	3.20385	2.92022	3.2657	3.35577	4.1977	3.75902
PSAP	NA	0.525873	1	-0.015884	0.990902	-0.541757	0.37341		5.58447	6.28581	6.55076	6.81319	6.72431	6.5813	5.9688	5.83249	6.63499
MFSD10	NA	-1.25013	1	-2.59967	0.0631584	-1.34954	0.37341		3.38794	3.80369	4.39644	3.35853	3.22565	2.76742	2.39162	2.63405	2.61347
DHX8	NA	-0.383659	1	0.451988	0.770765	0.835647	0.374135		4.08205	3.47476	3.60397	3.35853	3.35711	3.63536	4.04218	4.1977	3.86776
CAST	NA	0.318513	1	-0.278671	0.822247	-0.597184	0.374812		4.90076	4.58069	4.63045	5.00703	4.9011	5.00399	4.50538	4.10819	4.71464
ENSNFUG00015004069	ARL1	-0.0794152	1	-0.917777	0.462849	-0.838362	0.374812		4.77006	6.95751	5.82435	6.22713	6.23635	5.613	5.28277	5.77549	4.52842
RPF2	NA	-0.36694	1	-1.0805	0.224332	-0.713564	0.374873		4.46669	5.58882	5.30756	4.85937	4.94356	4.87184	3.67042	4.70469	4.31455
ENSNFUG00015008651	VWA9	0.241593	1	-0.805494	0.66109	-1.04709	0.375185		2.71968	3.72822	3.6894	3.62558	3.78832	3.52235	2.95278	3.07302	3.04255
ENSNFUG00015022186	OLA.7388	0.139418	1	1.1695	0.439335	1.03009	0.375185		2.40426	2.91815	3.51316	3.20385	3.08101	3.11794	3.52165	4.01277	3.75902
MED27	NA	-0.658034	1	0.128798	0.942993	0.786831	0.375871		4.28715	4.39794	3.77005	3.49822	3.58877	3.92936	3.80526	4.43705	4.46059
ENSNFUG00015004311	GPI	0.252947	1	-0.155552	0.85433	-0.408499	0.376193		6.25632	6.37511	6.30225	6.50072	6.62345	6.53835	5.9688	6.04034	6.43745
PRNPB	NA	2.12044	0.437443	1.05361	0.59246	-1.06683	0.376328		2.40426	2.77547	3.07903	4.13395	3.69199	4.3822	2.39162	3.25084	3.96887
ENSNFUG00015018229	Nfu_g_1_011169	-0.815453	1	-2.06227	0.152738	-1.24682	0.377151		4.54872	4.00896	3.84643	3.03057	3.78832	3.74016	2	2.35158	3.64142
ENSNFUG00015001127	HNRNPH1L	0.383734	1	-0.681913	0.739029	-1.06565	0.378397		2.97836	3.64858	3.20041	3.35853	3.78832	3.52235	2.95278	2.87017	3.04255
ENSNFUG00015015746	ERAL1	0.62656	1	-0.158007	0.930774	-0.784567	0.379569		3.19764	4.00896	4.44638	4.37053	4.44944	4.67439	3.52165	4.10819	3.96887
ENSNFUG00015005642	DECR2	0.364598	1	-0.270384	0.840224	-0.634983	0.379651		4.18824	5.08293	5.16571	5.183	5.2102	5.27213	4.72543	4.1977	4.97986
SI:CH211-260E23.9	NA	1.47408	0.594781	0.639813	0.682746	-0.834267	0.379829		3.84289	3.27709	4.05395	4.69484	4.5072	5.40558	3.52165	3.91058	4.87954
NOB1	NA	-0.472973	1	0.170176	0.903517	0.643149	0.381104		4.77006	4.1312	4.71437	4.2172	4.11987	4.17348	4.65575	4.70469	4.71464
ENSNFUG00015015956	YWHAQ	-0.0398853	1	-0.755968	0.487884	-0.716083	0.381171		4.08205	4.95636	5.38643	4.95947	4.9848	4.72634	3.80526	4.43705	4.52842
ENSNFUG00015003830	ACADL	0.22082	1	-0.541507	0.694043	-0.762327	0.381514		4.46669	4.9229	5.10482	4.80658	5.13891	5.20046	3.52165	4.01277	5.16172
ENSNFUG00015009965	SCOC	-0.558573	1	0.274254	0.870695	0.832827	0.381709		4.18824	4.18864	3.31237	3.74259	3.35711	3.52235	4.3375	4.10819	3.96887
ANKRD22	NA	0.316692	1	-0.380433	0.782485	-0.697125	0.382218		5.41985	5.87786	5.98503	6.01087	5.99529	6.23186	4.65575	4.7645	6.26923
ENSNFUG00015019048	SLC35B3	-0.530108	1	-1.66292	0.248824	-1.13281	0.382218		3.19764	5.05232	3.51316	3.9515	3.87862	3.52235	2.95278	3.07302	3.21712
DBI	NA	-0.538824	1	-0.048693	0.970582	0.490131	0.382235		10.7335	9.69756	9.76423	9.51959	9.83223	9.44665	10.3023	9.92818	10.0363
ENSNFUG00015017077	DNAJC19	-1.01479	0.828239	-0.348517	0.788629	0.666275	0.382294		6.92743	5.5455	5.6857	5.00703	5.175	5.49815	6.15711	5.68552	5.66203
PSME1	NA	-0.371324	1	0.486212	0.766318	0.857536	0.382294		5.02059	4.07137	3.77005	4.2172	4.11987	3.83786	4.65575	5.3761	3.86776
ENSNFUG00015002977	GCDHL	0.52427	0.79494	0.85383	0.0114783	0.32956	0.382861		7.00213	7.18624	6.92119	7.54299	7.42436	7.68161	7.83633	7.91483	7.87682
SFT2D2B	NA	-0.520346	1	0.331817	0.844198	0.852163	0.382861		4.28715	3.47476	3.51316	3.49822	3.22565	3.52235	4.04218	4.01277	3.96887
FTSJ1	NA	0.0676961	1	0.620243	0.451813	0.552547	0.382861		4.62633	4.53712	4.75457	4.80658	4.56273	4.72634	4.97472	5.07911	5.43346
ENSNFUG00015018984	EXT2	0.414994	1	-0.546587	0.776406	-0.961581	0.383251		2.97836	3.56429	3.84643	3.85083	3.87862	3.74016	2.69931	3.25084	3.51337
ENSNFUG00015015440	DYNLL1	-1.79816	0.111399	-1.01453	0.33868	0.783628	0.383265		6.37351	7.9632	6.03485	5.44716	5.6555	4.87184	6.23085	6.3249	5.60034
ENSNFUG00015007724	CCBL1	0.379928	1	1.39761	0.332211	1.01768	0.383265		2.97836	2.61712	3.07903	3.20385	2.73925	3.2657	3.80526	3.40912	3.86776
ENSNFUG00015007079	NDUFB6	-0.621673	1	-0.115342	0.91974	0.506331	0.38413		6.7306	6.04269	5.89798	5.51454	5.93344	5.52773	6.20668	6.06434	6.16654
PLA1A	NA	0.323846	1	-0.23845	0.840224	-0.562296	0.384836		6.71292	6.8459	6.94744	6.92884	7.19757	7.30823	5.91015	6.24316	7.29113
ME2	NA	0.254373	1	-0.839151	0.66578	-1.09352	0.384894		3.55604	3.16708	3.51316	3.49822	3.69199	3.52235	2.39162	2.63405	3.51337
CREB3L3A	NA	-0.361715	1	0.258709	0.841042	0.620424	0.385217		6.79924	5.17107	5.86164	5.67036	5.73017	5.81845	6.43183	6.28461	6.24927
ENSNFUG00015019964	KLF11B	-0.871649	1	-1.59274	0.0319539	-0.721095	0.386673		5.28274	5.35794	5.04124	4.37053	4.66777	4.3822	4.50538	3.80059	3.21712
ENSNFUG00015018926	C3H22ORF32	-0.674478	0.942027	-0.199995	0.840224	0.474483	0.386806		8.00146	7.28172	7.06399	6.81319	7.05961	6.62301	7.28716	7.1718	7.43944
ENSNFUG00015017452	BCL2L10	-0.896813	0.982497	-0.234229	0.857202	0.662584	0.386806		4.96192	5.11292	4.39644	4.04561	3.9636	4.31592	4.58252	4.87717	4.46059
ENSNFUG00015011305	POLR2F	-0.40329	1	0.141267	0.908344	0.544557	0.386806		5.69668	5.22698	5.13558	5.00703	4.94356	5.04549	5.81746	5.48678	5.07365
ENSNFUG00015023046	TARSL2	0.55106	1	-0.270852	0.884728	-0.821912	0.386806		2.97836	3.94373	4.11698	4.13395	4.26085	4.24646	3.35577	3.68153	3.75902
ENSNFUG00015011822	C2H1ORF35	-0.720124	1	0.34763	0.871543	1.06775	0.386806		4.08205	2.91815	3.20041	3.20385	3.08101	2.76742	3.80526	3.25084	3.86776
PCBP2	NA	0.22082	1	-0.367047	0.749876	-0.587866	0.386878		4.69999	5.02103	5.43671	5.33981	5.24457	5.30666	4.24562	4.87717	5.07365
COPZ2	NA	-0.46614	1	-1.32204	0.218993	-0.855896	0.387045		3.84289	4.98906	4.23533	4.2172	4.19208	3.83786	3.67042	3.55175	3.21712
ENSNFUG00015018217	ELMOD3	-1.08556	1	0.0615716	0.983266	1.14713	0.38712		4.08205	2.91815	3.41626	2.83359	2.92022	2.9533	4.14748	3.25084	3.04255
ENSNFUG00015007947	EVI5B	-0.730329	1	0.178794	0.926706	0.909123	0.38712		4.37971	3.27709	3.6894	3.35853	3.08101	3.52235	4.04218	4.10819	3.64142
ENSNFUG00015007487	ESPNL	-0.649436	1	0.311491	0.874365	0.960928	0.38712		4.18824	3.27709	3.20041	3.03057	3.22565	3.2657	3.92858	3.91058	3.51337
ENSNFUG00015005723	Nfu_g_1_011869	-0.456506	1	0.388385	0.817473	0.844891	0.38712		3.55604	4.07137	3.84643	3.62558	3.35711	3.63536	4.42388	4.43705	3.37284
ATP6V1BA	NA	0.195031	1	-0.950379	0.630153	-1.14541	0.38712		2.40426	4.44584	4.83175	4.13395	4.44944	4.56451	2.69931	3.25084	4.23558
ENSNFUG00015021164	DPM1	-0.188715	1	-1.07651	0.40031	-0.887791	0.38712		3.38794	4.88864	4.17737	4.04561	4.44944	3.92936	3.35577	3.55175	3.64142
SRPK1A	NA	-1.22009	1	-0.0993576	0.971135	1.12073	0.387502		4.28715	2.91815	3.41626	3.03057	2.92022	2.76742	3.80526	3.55175	3.21712
PLIN2	NA	-1.77739	0.0251723	-1.11461	0.15493	0.662782	0.387935		6.86476	7.95908	6.59571	5.75637	5.2102	5.71938	6.25461	6.57922	5.60034
ENSNFUG00015015639	NR1H5	-0.297585	1	0.41548	0.764298	0.713065	0.387935		6.48188	4.44584	5.5323	5.37649	5.2102	5.64034	5.99725	6.15652	6.07877
OSTC	NA	-0.32776	1	-0.699718	0.103028	-0.371959	0.388348		8.73816	9.10306	8.8273	8.64485	8.61544	8.45682	8.01392	8.00438	8.53416
ENSNFUG00015020907	PYURF	-0.772937	0.882622	-0.257685	0.801	0.515252	0.38969		6.74807	6.21845	5.95084	5.41226	5.86881	5.49815	6.18211	6.28461	5.7499
ENSNFUG00015000391	FOXK2	0.185258	1	1.18118	0.425945	0.99592	0.38969		4.37971	2.43922	3.41626	3.49822	3.47758	4.01541	4.50538	4.01277	4.71464
ENSNFUG00015003918	BX470131.2	2.04651	0.165644	1.1481	0.396824	-0.89841	0.390432		3.38794	5.30697	3.6894	6.07922	6.09283	6.50898	4.24562	5.29729	6.10122
MFN2	NA	0.509524	1	-0.303536	0.863477	-0.813061	0.390432		3.19764	3.80369	4.11698	4.13395	4.11987	4.24646	3.67042	3.80059	3.21712
GPRC5C	NA	-0.173451	1	-0.939064	0.395509	-0.765613	0.390691		3.96742	4.29708	4.79367	4.50912	4.11987	4.17348	3.67042	3.40912	3.96887
ENSNFUG00015013177	PCGF5	0.506655	1	1.26755	0.207449	0.760892	0.390691		3.96742	3.16708	3.41626	3.9515	3.47758	4.0966	4.72543	4.1977	4.38941
ENSNFUG00015023443	GAMT	-0.686015	1	0.0560694	0.978167	0.742084	0.391014		8.49603	6.68556	6.28862	6.90393	6.77221	6.79099	7.45041	7.75447	7.40377
ENSNFUG00015022398	LTN1	0.278208	1	-0.621273	0.712923	-0.899481	0.391325		3.38794	3.47476	3.84643	3.74259	3.87862	3.74016	3.1683	3.07302	3.37284
ENSNFUG00015011498	TM7SF2	-0.984604	1	-1.83173	0.0438104	-0.847124	0.391631		4.54872	5.50085	6.34236	5.183	4.76568	4.24646	4.58252	3.68153	3.86776
EPCAM	NA	-0.152352	1	0.432897	0.681622	0.585249	0.391885		5.73222	6.1478	5.43671	6.14447	5.57677	5.08582	6.41084	6.40225	5.7212
GALE	NA	0.00737506	1	-0.985192	0.54397	-0.992567	0.393421		3.19764	3.94373	3.51316	3.62558	3.69199	3.52235	2.95278	3.25084	2.8439
CRY1A	NA	0.693008	1	0.00793256	0.994256	-0.685076	0.393458		4.54872	3.72822	3.91897	4.63555	4.5072	4.72634	4.24562	3.80059	4.15204
ENSNFUG00015003082	EIF4A3	-0.321883	1	0.160182	0.877788	0.482065	0.393458		5.13123	5.45477	5.50899	5.22383	4.9848	5.08582	5.53648	5.65424	5.39763
ENSNFUG00015012088	KCTD17	-0.141518	1	0.657193	0.627658	0.798712	0.393513		3.70658	3.94373	3.31237	3.62558	3.35711	3.74016	3.92858	4.01277	4.46059
ENSNFUG00015021442	NDUFS5	-0.726716	1	-0.0783256	0.964041	0.64839	0.393576		9.09626	7.53524	7.44792	7.52677	7.56017	7.47695	8.55361	7.94746	7.87682
ENSNFUG00015013705	MYL9	-0.306241	1	0.211907	0.84521	0.518148	0.393576		6.10186	5.5455	5.50899	5.78394	5.46462	5.00399	6.10577	5.74612	5.91104
ENSNFUG00015001218	SFXN5B	0.35992	1	-0.555177	0.762927	-0.915096	0.393576		3.55604	3.37931	3.6894	3.85083	3.87862	3.63536	2.69931	3.25084	3.51337
PPWD1	NA	-0.192365	1	0.464656	0.69378	0.65702	0.393576		4.18824	4.00896	4.17737	3.85083	3.9636	4.0966	4.58252	4.28197	4.5932
ENSNFUG00015023695	UBE2D1A	-0.113326	1	0.74728	0.604166	0.860606	0.393576		4.37971	3.16708	3.84643	3.85083	3.58877	3.83786	5.03085	4.10819	3.86776
ENSNFUG00015016987	PEX11G	0.0718842	1	-0.900161	0.577726	-0.972045	0.393576		3.19764	3.64858	3.91897	3.74259	3.35711	3.92936	3.35577	2.87017	3.04255
ENSNFUG00015000418	ALAD	-0.0968163	1	-0.647709	0.427803	-0.550893	0.393576		4.77006	5.30697	5.30756	5.14098	5.13891	4.96127	4.65575	4.64229	4.52842
ENSNFUG00015022196	PAXBP1	-1.02676	1	-0.0954508	0.968768	0.931308	0.393633		5.4628	3.80369	3.60397	3.62558	3.78832	3.74016	4.65575	4.50876	4.06336
RAD51C	NA	-1.2717	1	-0.157403	0.951576	1.1143	0.393833		4.28715	3.56429	3.20041	3.03057	3.08101	2.76742	3.1683	4.28197	3.04255
ENSNFUG00015012026	SCARB2	1.1077	1	0.215911	0.923326	-0.891793	0.393833		2.71968	3.37931	3.77005	4.13395	3.9636	4.3822	3.67042	2.87017	3.86776
ENSNFUG00015022585	EIF4E2	0.114855	1	-0.561011	0.635499	-0.675866	0.393833		3.96742	5.22698	4.75457	4.95947	4.71755	4.91725	4.14748	4.1977	4.52842
HSD17B10	NA	-0.857487	0.855054	-0.301371	0.786703	0.556116	0.393941		7.17997	6.08868	6.083	5.75637	5.80115	5.613	5.99725	6.3249	6.38353
SFPQ	NA	-0.669131	1	0.000336151	0.999426	0.669467	0.393941		4.96192	5.30697	4.23533	4.37053	4.11987	4.50626	5.18722	4.57707	4.87954
ENSNFUG00015000266	BX470141.1	-0.0922729	1	0.892395	0.582273	0.984668	0.393941		3.70658	3.04797	2.80053	3.35853	2.92022	3.11794	3.92858	3.91058	3.37284
SLC30A5	NA	-0.0907773	1	-0.917565	0.467566	-0.826787	0.393941		3.70658	4.24388	3.98804	3.9515	4.04385	3.83786	3.52165	3.55175	3.04255
ENSNFUG00015011856	HUS1B	0.395779	1	1.2039	0.292559	0.808125	0.393941		2.97836	3.27709	3.41626	3.62558	3.47758	3.39972	4.14748	3.80059	4.23558
ENSNFUG00015012142	EIF3JB	-0.381322	1	-1.23777	0.279532	-0.856445	0.393941		3.96742	4.95636	3.91897	3.9515	4.32649	3.92936	3.35577	3.68153	3.37284
ENSNFUG00015024961	C1QBP	-0.549912	1	-1.04838	0.0589765	-0.498467	0.394195		6.1552	6.74421	7.16438	6.16559	6.23635	6.28479	5.53648	5.94016	5.77803
GIT2B	NA	-0.174345	1	0.799672	0.627576	0.974017	0.394221		3.55604	2.91815	3.07903	3.03057	2.92022	3.2657	3.92858	3.55175	3.51337
SRPRA	NA	-0.206786	1	-1.12027	0.404917	-0.913487	0.394221		3.19764	4.704	4.63045	4.2172	4.44944	3.83786	3.52165	3.91058	3.04255
ENSNFUG00015008621	ACAT1	-0.383221	1	0.379119	0.805308	0.76234	0.394525		5.07697	3.80369	3.91897	4.2959	3.87862	3.92936	4.79191	4.3616	4.77173
ENSNFUG00015005715	SET	0.486536	1	0.946632	0.0801833	0.460096	0.394525		4.69999	5.30697	5.19522	5.51454	5.52178	5.613	5.78519	6.11117	6.00926
ENSNFUG00015000069	HLX1	-1.24924	1	-0.208022	0.92499	1.04122	0.394951		3.70658	3.37931	3.77005	3.03057	3.08101	2.55399	3.52165	3.80059	3.04255
ENSNFUG00015014290	TARDBPL	0.234015	1	-0.350377	0.764298	-0.584392	0.394951		4.90076	4.74287	4.54135	4.95947	4.9011	4.91725	4.14748	4.28197	4.77173
ENSNFUG00015015955	CFL2	-0.443635	1	0.039312	0.977329	0.482947	0.396241		6.12878	6.8548	6.17473	6.16559	5.93344	5.93342	6.47294	6.73683	6.14509
ECHDC2	NA	-0.841158	1	-0.0137931	0.99303	0.827365	0.396723		4.62633	3.87541	3.6894	3.03057	3.58877	3.74016	4.14748	4.10819	3.96887
ATP5F1E	NA	-0.7848	1	-0.0886731	0.962321	0.696127	0.396723		10.5402	8.55825	8.7449	8.64108	9.10603	8.58898	9.70961	9.44316	9.28299
ENSNFUG00015005472	ETFA	-0.0489348	1	-0.554655	0.485663	-0.50572	0.396928		5.73222	6.50515	6.39417	6.07922	6.33534	6.21377	5.61202	5.3761	6.12332
ENSNFUG00015019722	TRAF2B	-0.149217	1	0.774971	0.62265	0.924188	0.397849		3.84289	3.04797	3.07903	3.35853	3.08101	3.2657	4.14748	3.80059	3.51337
ENSNFUG00015002686	RABAC1	-0.81165	0.74006	-0.305887	0.749876	0.505763	0.398937		5.5045	5.2808	5.55523	4.80658	4.66777	4.72634	5.23579	5.03121	5.24472
COX16	NA	-0.719344	1	0.105601	0.959351	0.824945	0.398937		4.46669	3.56429	3.91897	3.35853	3.69199	3.39972	4.14748	4.3616	3.64142
ENSNFUG00015017196	ARHGDIA	0.241685	1	-0.556242	0.713903	-0.797927	0.398937		3.19764	4.58069	4.34471	4.50912	4.26085	4.3822	3.35577	4.01277	3.86776
PLPP1	NA	0.085031	1	-0.651041	0.606338	-0.736072	0.398937		3.55604	4.53712	4.54135	4.44149	4.38928	4.31592	3.52165	3.91058	3.96887
ENSNFUG00015020617	OLA.5240	-0.35706	1	-0.0663241	0.923444	0.290736	0.399838		8.27888	8.28627	8.14412	7.89235	7.94159	7.81955	8.23909	8.19577	8.07695
SELENOT1A	NA	-0.47334	1	-0.0989558	0.909688	0.374384	0.400182		6.83237	6.57143	6.62853	6.18639	6.27011	6.21377	6.49306	6.47566	6.7531
ENSNFUG00015006361	ASNA1	0.528494	1	-0.358494	0.852608	-0.886987	0.400182		2.97836	4.78072	4.71437	4.85937	4.66777	4.96127	3.1683	4.10819	4.65519
RGRB	NA	0.754359	1	0.168266	0.903814	-0.586093	0.400189		5.73222	6.67555	6.692	7.05865	7.215	7.22038	5.91015	6.3249	7.23133
ENSNFUG00015003190	AHCYL2 ENSNFUG00015003190	0.838177	1	-0.148805	0.956271	-0.986982	0.400276		2.40426	3.80369	3.51316	3.9515	3.87862	4.0966	2.69931	3.25084	3.75902
LMF2A	NA	0.751403	0.889201	1.22215	0.018828	0.470748	0.401245		5.28274	4.8176	4.71437	5.26353	5.70571	5.79431	5.93978	6.13402	6.05597
SIGIRR	NA	0.423361	1	-0.0973228	0.940122	-0.520683	0.401245		5.28274	6.02703	6.28862	6.39742	6.30309	6.31903	5.32828	6.06434	6.03281
IVD	NA	0.797633	1	0.153833	0.92328	-0.6438	0.401245		3.84289	5.50085	4.67302	5.54708	5.60349	5.55672	4.91632	4.93036	5.11836
ENSNFUG00015001806	SLC38A9	0.835004	1	0.234474	0.857094	-0.60053	0.401477		5.28274	6.4938	6.06712	6.8397	6.63645	7.01639	5.61202	6.06434	6.83574
ENSNFUG00015007878	COX6A1	-0.813632	0.889201	-0.285844	0.792478	0.527788	0.402138		9.87941	8.64032	8.63614	8.34514	8.42255	8.34079	9.15254	8.74104	8.74485
ENSNFUG00015000383	ZFAND2A	-0.571666	1	0.126072	0.939085	0.697738	0.402161		4.28715	4.4922	4.17737	3.85083	3.58877	4.17348	3.92858	4.64229	4.5932
PDPK1B	NA	0.271812	1	-0.634097	0.715639	-0.905909	0.402372		3.19764	4.07137	3.6894	3.9515	3.78832	4.01541	2.69931	3.25084	3.75902
OPTN	NA	0.462503	1	-0.159734	0.915838	-0.622238	0.404447		3.96742	4.62297	4.39644	4.7518	4.94356	4.56451	4.04218	4.43705	4.23558
HIGD1A	NA	-0.0573723	1	-0.887528	0.511121	-0.830156	0.404447		3.38794	5.17107	4.54135	4.50912	4.76568	4.24646	4.24562	3.68153	3.64142
TMPRSS6	NA	0.63449	0.950711	0.196237	0.840224	-0.438253	0.404626		5.86623	5.45477	5.60005	6.12305	6.07384	6.46379	5.57475	5.86017	5.98532
ENSNFUG00015017931	AMT	0.752415	1	0.018413	0.99147	-0.734002	0.405515		3.55604	4.98906	5.62194	5.33981	5.77788	5.79431	5.03085	4.57707	5.28449
ENSNFUG00015016293	KLHDC10	-0.899398	1	0.230744	0.925842	1.13014	0.405515		4.28715	2.91815	2.94649	3.03057	2.73925	3.11794	3.80526	3.91058	3.04255
ENSNFUG00015006720	FHL1B	-0.062959	1	0.860425	0.58093	0.923384	0.405853		3.70658	3.16708	3.41626	3.85083	3.08101	3.11794	4.50538	3.25084	4.06336
ENSNFUG00015013382	SMIM8	-0.801643	1	-0.203936	0.875774	0.597707	0.406075		5.95916	5.17107	5.30756	4.7518	5.06391	4.50626	5.6838	5.33723	4.82664
CBY1	NA	-0.334621	1	0.385115	0.788629	0.719736	0.406075		3.84289	3.80369	4.11698	3.9515	3.58877	3.52235	4.3375	4.01277	4.31455
ENSNFUG00015017051	NUP160	0.478224	1	-0.452592	0.826724	-0.930816	0.406255		3.19764	3.27709	3.51316	3.74259	3.58877	3.63536	2.95278	3.07302	3.21712
ENSNFUG00015018759	PFN2L	-0.190293	1	-0.671469	0.327486	-0.481176	0.406982		5.58447	5.94607	5.70634	5.75637	5.52178	5.46795	5.45677	4.93036	5.02752
ENSNFUG00015022396	SYPL2B	0.200265	1	-0.554182	0.697659	-0.754447	0.407078		3.38794	5.14229	5.28028	4.95947	5.1019	5.00399	4.3375	4.10819	4.65519
ENSNFUG00015017264	TOM1	0.222968	1	0.935491	0.381862	0.712523	0.407972		4.83689	3.27709	4.17737	4.44149	4.19208	4.44556	5.03085	4.70469	5.11836
ENSNFUG00015001876	OLA.7742	0.727263	0.728846	0.297067	0.729467	-0.430196	0.408191		5.98885	6.78202	6.24696	7.1568	7.04992	7.05754	6.38953	6.70666	6.87535
ENSNFUG00015022245	SLC25A33	-0.302478	1	0.413751	0.778066	0.716228	0.408191		6.62111	4.95636	5.86164	5.14098	5.37439	6.24972	6.78181	6.30489	5.77803
ENSNFUG00015011964	MRPL19	-0.153944	1	-0.779646	0.409776	-0.625702	0.408191		4.77006	5.02103	4.75457	4.69484	4.9848	4.44556	3.67042	4.43705	4.38941
MAN2B1	NA	2.03259	0.00507415	1.4456	0.0600358	-0.586993	0.409106		3.19764	3.64858	3.84643	5.48124	4.76568	5.40558	4.72543	4.7645	4.71464
TMEM251	NA	-0.447846	1	0.154249	0.911214	0.602095	0.409504		4.54872	4.58069	4.44638	3.9515	4.04385	4.44556	4.72543	4.70469	4.52842
ENSNFUG00015008383	GDPD1	-0.346431	1	-1.25033	0.328505	-0.9039	0.409581		4.08205	4.24388	3.51316	3.62558	3.58877	3.92936	3.35577	2.87017	3.21712
SUDS3	NA	-0.305035	1	0.665485	0.712425	0.970519	0.409879		3.84289	2.91815	2.94649	3.03057	3.08101	3.11794	3.80526	3.55175	3.64142
PDCD2	NA	-0.30238	1	-1.37113	0.381448	-1.06875	0.409879		3.38794	3.80369	3.41626	3.20385	3.47758	3.39972	2.69931	3.07302	2.61347
SNX6	NA	0.642638	1	-0.273795	0.90299	-0.916433	0.410083		2.97836	3.87541	4.05395	4.13395	4.11987	4.3822	2.39162	3.80059	3.96887
ENSNFUG00015001741	DHRS7B	0.0797083	1	-0.732692	0.606338	-0.8124	0.410869		3.55604	4.24388	4.39644	4.2959	4.11987	4.17348	2.95278	3.40912	4.15204
ENSNFUG00015014934	UBE4B	0.485307	1	-0.270944	0.878043	-0.756251	0.410951		3.55604	3.72822	3.91897	3.9515	4.04385	4.31592	3.35577	3.55175	3.75902
ENSNFUG00015002329	RPA1	0.0722445	1	-0.731425	0.602948	-0.80367	0.410951		4.08205	3.94373	5.41179	4.44149	5.1019	4.50626	4.04218	3.80059	4.31455
ANKZF1	NA	0.00284862	1	-1.03317	0.555763	-1.03602	0.412286		3.70658	3.56429	3.07903	3.49822	3.58877	3.2657	2.95278	3.07302	2.61347
ITM2A	NA	1.0148	1	0.11055	0.967265	-0.904249	0.412298		2.71968	3.47476	3.20041	3.85083	3.78832	3.92936	2.95278	3.07302	3.64142
ENSNFUG00015022081	PDE8A	-0.0773338	1	1.13305	0.583321	1.21038	0.412298		3.84289	2.23626	2.63813	2.83359	2.92022	3.11794	3.92858	3.91058	3.04255
ENSNFUG00015000153	MRPL52	-1.00838	0.665617	-0.426681	0.686931	0.581698	0.412333		6.20665	5.75014	5.5323	4.91029	5.13891	4.72634	5.49718	5.88733	4.77173
COPE	NA	-0.0452623	1	-0.710551	0.522125	-0.665289	0.412333		4.83689	6.80975	6.30225	6.30531	6.31931	5.81845	5.37239	5.48678	5.7499
[truncated: 8,949 more rows]

## Sheet: S5
Supplementary Table 5: 231 genes whose levels were significantly changed between Young and Old.
Row-names	Symbol	Old-Young_log2FoldChange	Old-Young_padj	Adult-Young_log2FoldChange	Adult-Young_padj	Old-Adult_log2FoldChange	Old-Adult_padj
GCK	NA	-10.71	6.42227e-05	-4.77736	0.415876	-5.93265	0.0585211
LEG1.1	NA	-7.04963	6.52671e-25	-2.61645	0.000391731	-4.43318	1.50163e-09
INHBC	NA	-6.88939	0.000351396	-2.71863	0.393486	-4.17076	0.0649617
ENSNFUG00015022132	FDPS	-6.79455	0.000179061	-2.80957	0.847216	-3.98498	0.0561896
PONZR2	NA	-6.59842	0.00112397	-4.00051	0.111753	-2.59791	0.33572
ENSNFUG00015001578	HMGCS1	-5.1998	0.0021466	-0.798058	1	-4.40174	0.018706
ENSNFUG00015002052	NSDHL ENSNFUG00015002052	-5.18024	4.08551e-06	-1.27919	1	-3.90105	0.00227341
ENSNFUG00015023419	CDCA7A	-4.92031	0.0282401	0.340994	1	-5.26131	0.0173226
SI:DKEY-183N20.15	NA	-4.71811	0.000794003	-4.18707	0.0108524	-0.531042	0.799539
SQLEA	NA	-4.63809	3.22803e-05	-0.769994	1	-3.8681	0.00169329
MVDA	NA	-4.42897	0.000377719	-1.31069	1	-3.11828	0.0273576
COL1A1B	NA	-4.28776	0.002102	-1.72786	1	-2.55991	0.109427
ENSNFUG00015024212	COL1A2	-4.2174	0.00129368	-2.03552	0.665617	-2.18188	0.157928
ENSNFUG00015003910	FDFT1 ENSNFUG00015003910	-4.09678	5.97864e-05	-0.61029	1	-3.48649	0.00175786
ENSNFUG00015011529	HSP90AA1.2	-4.08238	0.0174621	-1.72209	1	-2.36029	0.203088
AACS	NA	-4.06786	0.00183867	0.183315	1	-4.25118	0.00157017
ANGPTL4	NA	-4.01964	0.00142752	-1.4214	1	-2.59824	0.0662607
IFRD2	NA	-3.71515	0.0147662	-0.368132	1	-3.34702	0.0310135
MCM6	NA	-3.70989	0.0114783	-0.0272563	1	-3.68264	0.0149841
ACSL1A	NA	-3.70704	0.0206756	-1.54349	1	-2.16354	0.221884
CCDC57	NA	-3.63175	0.0114783	0.403007	1	-4.03476	0.00445936
PFKFB4B	NA	-3.54927	2.33477e-09	-2.06495	0.00375487	-1.48432	0.053507
ENSNFUG00015017425	AMD1	-3.36624	0.0116629	-0.869995	1	-2.49625	0.0749319
ENSNFUG00015017130	YKT6	-3.35734	0.00660472	0.0140585	1	-3.37139	0.00865043
ENSNFUG00015009576	MCM3	-3.34906	0.0115591	-0.153048	1	-3.19601	0.0198269
ACLY	NA	-3.32994	0.0310585	0.113539	1	-3.44348	0.0232726
CALR	NA	-3.30316	0.0002396	-1.17182	0.90193	-2.13134	0.0413818
CYP51	NA	-3.28723	0.000122628	-0.730574	1	-2.55666	0.00830058
ZGC:174895	NA	-3.28256	0.0164204	-3.53119	0.0321794	0.248632	0.908079
GADL1	NA	-3.15351	6.04615e-08	-1.2542	0.347717	-1.89931	0.00866963
ENSNFUG00015006808	GLTPD1	-3.13647	0.0140641	-1.55238	0.90193	-1.58409	0.273549
ALG6	NA	-3.13148	0.0412344	-0.129596	1	-3.00188	0.0433607
LSS	NA	-3.07221	0.002102	-1.23167	1	-1.84054	0.105144
MSMO1	NA	-3.04506	0.000511286	-0.80407	1	-2.24099	0.0237184
ENSNFUG00015021074	DHCR24	-2.93292	0.0297826	-0.20204	1	-2.73088	0.0386236
ENSNFUG00015013919	HYOU1	-2.8271	0.000553172	-0.397071	1	-2.43003	0.00769324
TMEM86B	NA	-2.80408	6.3378e-06	-0.742134	1	-2.06195	0.00445936
ENSNFUG00015001750	MTP	-2.80305	0.0174621	0.82466	1	-3.62771	0.000949805
ENSNFUG00015017956	EDEM1	-2.79898	0.0205072	0.592873	1	-3.39185	0.00321927
CALUB	NA	-2.74797	0.0395056	-0.826384	1	-1.92159	0.160727
CYB5R2	NA	-2.73111	0.000620238	-1.40763	0.553335	-1.32349	0.171767
ENSNFUG00015018200	EBP	-2.66321	0.00145554	-1.06336	1	-1.59986	0.0909883
DHCR7	NA	-2.5603	0.00199983	-1.23045	0.926598	-1.32986	0.16643
MCM5	NA	-2.55077	0.0164204	-0.0728866	1	-2.47789	0.021286
RDH12	NA	-2.51196	0.000553172	-0.417501	1	-2.09446	0.0099962
TAFAZZIN	NA	-2.49148	0.0114783	0.0212028	1	-2.51269	0.0126952
PRDX1	NA	-2.47962	0.0154672	-2.12159	0.21415	-0.358028	0.788133
ENSNFUG00015014638	pcna	-2.477	0.0409341	-0.265194	1	-2.21181	0.0604738
SLC22A2	NA	-2.37021	2.27775e-05	-0.610816	1	-1.75939	0.00771922
ERG28	NA	-2.36603	0.00226924	-1.22774	0.88031	-1.13829	0.208915
SELENOM	NA	-2.36047	0.00163798	-1.76616	0.0698178	-0.594315	0.561087
STX5A	NA	-2.34204	0.0407935	0.431192	1	-2.77324	0.011506
ENSNFUG00015017752	HSP90B1	-2.29034	0.0030331	-0.272138	1	-2.0182	0.0166246
DNAJC3A	NA	-2.288	0.0355767	-0.215432	1	-2.07257	0.0514706
ENSNFUG00015004753	NARS	-2.24524	0.0380125	-0.377846	1	-1.8674	0.0811666
ENSNFUG00015000421	MMD	-2.22375	0.0326373	-0.648611	1	-1.57513	0.146804
ENSNFUG00015006067	MANF	-2.21477	0.0203382	-0.169827	1	-2.04494	0.0322262
ENSNFUG00015022523	IDI1	-2.18292	0.00337321	-0.609414	1	-1.5735	0.0520408
ENSNFUG00015005900	CU929036.1	-2.14659	0.0147662	0.278213	1	-2.42481	0.00477763
ENSNFUG00015006235	SDF2	-2.13891	0.0407935	-0.497122	1	-1.64179	0.120237
AKR1D1	NA	-2.10892	0.0438653	-0.654307	1	-1.45461	0.174153
SCDB	NA	-2.08089	0.000229022	-1.79597	0.00846229	-0.284923	0.722761
NDRG1A	NA	-2.0302	0.0232058	-0.239248	1	-1.79095	0.0440186
ENSNFUG00015019934	PMVK	-2.02482	0.000553172	-1.8644	0.00680909	-0.160421	0.859562
ENSNFUG00015017609	TMED7	-1.99294	0.0114783	-0.269734	1	-1.72321	0.0328806
FADS2	NA	-1.98505	0.00608715	-0.884134	1	-1.10092	0.171615
PDIA6	NA	-1.94689	0.00239997	-0.619624	1	-1.32727	0.0610578
ENSNFUG00015024069	ACACA	-1.9462	0.044372	0.0873359	1	-2.03353	0.0289622
ENSNFUG00015011984	ACADVL	-1.93942	0.0339965	0.0902879	1	-2.0297	0.0232308
ENSNFUG00015010335	PDIA4	-1.93825	0.0395056	0.0796053	1	-2.01786	0.0266921
ENSNFUG00015007666	Nfu_g_1_007654	-1.89762	0.000159388	-0.90348	0.704447	-0.994138	0.0911798
GLRX	NA	-1.87599	0.00239997	-2.12857	0.00133187	0.252584	0.76837
APEX1	NA	-1.85815	0.0204026	-0.73292	1	-1.12523	0.199174
ENSNFUG00015007629	SC5DL	-1.8411	0.0385093	-0.71338	1	-1.12772	0.225731
ENSNFUG00015011498	TM7SF2	-1.83173	0.0438104	-0.984604	1	-0.847124	0.391631
SLC25A36A	NA	-1.76476	0.0122184	-1.62683	0.0813869	-0.137934	0.889506
ENSNFUG00015020050	HADHAB	-1.74309	0.0355767	0.256521	1	-1.99961	0.0126952
ENSNFUG00015010348	HSD17B7	-1.71332	0.0310585	-0.785949	1	-0.927374	0.270982
ENSNFUG00015015122	CS	-1.69662	0.0354554	0.174887	1	-1.8715	0.0169952
ENSNFUG00015013978	HSPA9	-1.68816	0.0310585	0.0403769	1	-1.72853	0.0244344
ENSNFUG00015024340	CECR5	-1.67461	0.0165788	-0.156632	1	-1.51798	0.0322922
ENSNFUG00015007606	Nfu_g_1_007614	-1.61178	0.000301262	-0.626561	1	-0.985218	0.0515029
ENSNFUG00015019964	KLF11B	-1.59274	0.0319539	-0.871649	1	-0.721095	0.386673
ENSNFUG00015023561	TOR3A	-1.56852	0.0131203	-0.282998	1	-1.28552	0.0477215
PPIFB	NA	-1.55316	0.0174327	-1.01892	0.622617	-0.534241	0.494144
SEC61B	NA	-1.53831	0.00230053	-0.844658	0.704447	-0.693652	0.250634
ENSNFUG00015007598	Nfu_g_1_007730	-1.52182	0.00040822	-0.49036	1	-1.03146	0.0329387
ENSNFUG00015001955	CRELD2	-1.49938	0.0232058	-1.3043	0.220063	-0.195072	0.826771
CALR3	NA	-1.4656	0.00166752	-0.677974	0.982497	-0.787626	0.14429
PKLR	NA	-1.42627	0.000869486	-0.888615	0.368909	-0.537653	0.306002
ARF1	NA	-1.41437	0.0478418	-0.199571	1	-1.2148	0.0811666
TUBA8L3	NA	-1.35065	0.0232058	-0.693485	1	-0.657166	0.309815
CAHZ	NA	-1.28644	0.0353102	-0.173112	1	-1.11333	0.063206
ENSNFUG00015023562	HSD11B1L	-1.18117	0.0243296	0.318697	1	-1.49987	0.00234995
ENSNFUG00015013677	RBP4	-1.0833	0.000683559	-0.758426	0.168387	-0.324877	0.415027
ENSNFUG00015019104	TECRB	-1.07173	0.0330322	-0.57809	1	-0.493643	0.364653
ENSNFUG00015013479	PDIA3	-1.03684	0.0232775	-0.363008	1	-0.673831	0.158727
AMDHD1	NA	0.700468	0.0475239	0.511988	0.793969	0.188481	0.638373
HSP90AB1	NA	0.764245	0.0407935	0.207099	1	0.557146	0.139237
F7L	NA	0.767277	0.019691	0.38147	1	0.385807	0.275517
SERPINC1	NA	0.80806	0.00343959	0.473597	0.704447	0.334463	0.299329
KMO	NA	0.814355	0.0198885	0.467531	0.987955	0.346825	0.361544
ENSNFUG00015023743	Nfu_g_1_015541	0.828703	0.0415614	0.229775	1	0.598928	0.141999
HAL	NA	0.832014	0.0225415	0.576502	0.704447	0.255512	0.536816
ENSNFUG00015017855	NSA2	0.83887	0.00683561	0.426516	1	0.412354	0.233887
ENSNFUG00015017546	MIOX	0.851301	0.0330322	0.547428	0.90193	0.303873	0.493259
ENSNFUG00015002977	GCDHL	0.85383	0.0114783	0.52427	0.79494	0.32956	0.382861
SERPING1	NA	0.872865	0.0232058	1.04221	0.0126304	-0.169349	0.718658
GSTZ1	NA	0.880546	0.0395056	0.377154	1	0.503392	0.254668
AGXTB	NA	0.888392	0.0344804	0.929487	0.0956376	-0.0410947	0.939918
ENSNFUG00015023534	MDH1	0.891791	0.0206756	0.739174	0.340667	0.152617	0.748048
HOGA1	NA	0.892102	0.0240169	0.734704	0.378891	0.157399	0.744712
ENSNFUG00015022351	CLEP	0.914508	0.01832	0.458297	1	0.456212	0.274111
ENO1A	NA	0.966086	0.0310585	1.28985	0.00395028	-0.323766	0.513982
ENSNFUG00015016614	LAPTM4A	0.970226	0.0217384	0.540859	1	0.429366	0.345556
ENSNFUG00015021355	COMTD1	0.979908	0.000313818	0.432137	0.902451	0.547772	0.0790823
CCNI	NA	0.981256	0.0438104	0.267218	1	0.714038	0.13989
NOTS	NA	0.986932	0.0448376	0.904034	0.340667	0.0828984	0.892514
ALDH1L1	NA	0.988961	0.00291373	0.229519	1	0.759442	0.0342643
ENSNFUG00015022653	LDHB	1.00191	0.00199983	0.763836	0.158057	0.238073	0.557672
ENSNFUG00015009320	CCNG1	1.00462	0.0206756	0.659983	0.793969	0.344637	0.48276
ENSNFUG00015015062	AAMDC	1.01221	0.0160094	0.181319	1	0.830889	0.0502602
TYMP	NA	1.01683	0.0406019	0.46112	1	0.555708	0.271719
ENSNFUG00015002316	SCARA3	1.02265	0.00179157	0.530306	0.868961	0.492346	0.190269
ENSNFUG00015003666	FN1B ENSNFUG00015003666	1.05311	0.00301487	1.05575	0.0117295	-0.00263776	0.995277
ENSNFUG00015004974	TTC36	1.09168	0.045137	0.173069	1	0.918607	0.0842301
SI:CH1073-126C3.2	NA	1.09738	0.0217066	1.13558	0.0621344	-0.0381944	0.95022
ENSNFUG00015009220	OLA.21581	1.11995	0.00689213	0.0803591	1	1.03959	0.0174001
ENSNFUG00015007120	CTSL	1.12621	0.038055	0.236952	1	0.889255	0.0976566
ENSNFUG00015017777	HGD	1.1443	0.00136872	0.898323	0.095084	0.245981	0.59271
UGP2A	NA	1.16096	0.0114783	1.08059	0.0867578	0.0803756	0.896826
ENSNFUG00015022530	FAM210B	1.1697	0.0154303	0.0182164	1	1.15148	0.0197528
ENSNFUG00015014336	Nfu_g_1_012083	1.17344	0.000131294	0.651381	0.393486	0.522057	0.15546
SLC38A5B	NA	1.19282	0.0012986	0.746628	0.442108	0.446193	0.303576
ITIH3B.2	NA	1.19426	0.0407935	1.98067	0.000102321	-0.786406	0.184819
LMF2A	NA	1.22215	0.018828	0.751403	0.889201	0.470748	0.401245
ENSNFUG00015013216	ALDOB	1.23371	2.30587e-06	0.595448	0.352374	0.63826	0.0413818
C9	NA	1.23599	0.0297826	1.83184	0.000513972	-0.595852	0.325377
AMY2AL2	NA	1.24975	0.0243296	1.94871	9.81906e-05	-0.69896	0.233887
GLTPD2B	NA	1.25444	0.0273032	0.284065	1	0.970378	0.0861234
FAM20A	NA	1.25655	0.0395056	0.736013	1	0.520541	0.412656
ENSNFUG00015019852	PNP4B	1.26028	0.0438104	-0.326079	1	1.58636	0.00728167
ENSNFUG00015022339	SATL1	1.27699	0.0153456	0.249023	1	1.02797	0.052718
TPST1	NA	1.28199	0.0417332	0.874896	0.889201	0.407091	0.540189
FOXA3	NA	1.28702	0.00479857	0.114669	1	1.17236	0.0160943
GLUD1B	NA	1.30154	0.000688003	1.32162	0.00201815	-0.0200847	0.970429
NFIX	NA	1.32448	0.000743439	0.306404	1	1.01807	0.0198393
ENSNFUG00015017533	NFIL3-6	1.33458	0.0140641	-0.00296586	1	1.33755	0.0160943
C1R	NA	1.33565	0.040483	2.20941	9.81906e-05	-0.873763	0.180359
CHIA.4	NA	1.39611	0.000457046	1.56529	0.000119433	-0.169183	0.759664
CTHL	NA	1.41754	0.0147735	1.23379	0.186559	0.183756	0.805447
F5	NA	1.42537	0.0139236	0.781452	0.99278	0.643922	0.310015
ENSNFUG00015001702	NAP1L1	1.4278	0.0102086	-0.140898	1	1.5687	0.00445936
FBP1B	NA	1.44237	0.000157374	0.97307	0.116076	0.469299	0.3229
ENSNFUG00015018861	THEM6	1.47733	0.0355767	0.140977	1	1.33635	0.0504001
ENSNFUG00015013178	ANXA5B	1.48435	0.0032572	-0.130633	1	1.61498	0.00175786
PIGR	NA	1.49306	0.0384336	0.781751	1	0.711304	0.327658
ENSNFUG00015023887	CD9B	1.51685	0.00164692	1.07464	0.24507	0.442211	0.444645
ZBTB20	NA	1.52432	0.0385093	-0.0609928	1	1.58532	0.0269479
ENSNFUG00015015383	C7	1.52936	0.026846	1.47609	0.147746	0.0532756	0.950702
ENSNFUG00015024123	GLDC	1.5398	0.0287413	0.816008	1	0.723789	0.325377
ENSNFUG00015022051	PTS	1.54908	0.012512	-0.13062	1	1.6797	0.00708716
ENSNFUG00015002448	FTL	1.56022	0.000561371	-0.420152	1	1.98037	2.72316e-06
AGXTA	NA	1.56104	3.9103e-11	0.773501	0.0341144	0.78754	0.00866963
GDA	NA	1.57083	0.0319539	-0.402978	1	1.97381	0.00445936
AMDHD2	NA	1.58711	0.000696755	0.758547	0.90193	0.82856	0.111178
AQP7	NA	1.60076	9.3126e-06	0.914977	0.179813	0.68578	0.110113
ENSNFUG00015014886	RNF2	1.71154	0.00509637	0.278823	1	1.43272	0.0269479
ENSNFUG00015000267	RBP1A	1.71287	2.59134e-05	0.560516	1	1.15235	0.0160943
STEAP4	NA	1.72462	0.000156059	1.26302	0.0536087	0.461605	0.416203
ENSNFUG00015022907	GCHFR	1.72751	0.00689213	0.920165	0.942027	0.807346	0.264159
AFP4	NA	1.76823	0.00040822	1.0018	0.489594	0.766426	0.198104
ENSNFUG00015013006	PNPLA3	1.79753	0.00660472	1.76386	0.0339322	0.0336629	0.970029
FAH	NA	1.80899	3.5327e-13	1.00016	0.00225303	0.808832	0.0117058
KRT94	NA	1.83111	4.0799e-09	0.844993	0.170952	0.986121	0.00868422
ENSNFUG00015024029	ETV5	1.84476	0.00164692	1.48525	0.0881401	0.359516	0.611152
ENSNFUG00015019477	C19H9ORF91	1.85727	0.0168719	0.565071	1	1.2922	0.0940631
ENSNFUG00015012540	OATX	1.87348	0.00197018	1.12878	0.594781	0.744702	0.275517
SQSTM1	NA	1.93471	0.00660472	-0.332236	1	2.26695	0.00138898
SUOX	NA	1.96082	0.0237271	1.82672	0.167929	0.134096	0.893264
ENSNFUG00015008669	TFR1A	1.9725	0.00199983	2.0629	0.0038667	-0.0904032	0.917904
ENSNFUG00015018946	PSMB10	1.98615	0.00200739	1.19779	0.621946	0.788357	0.250853
ENSNFUG00015024148	OAT	2.04985	0.0197253	2.9282	0.000373963	-0.878348	0.352815
PNP5A	NA	2.05479	0.0115591	1.35107	0.665617	0.703724	0.452821
NR1D2A	NA	2.06464	0.0131681	0.0102786	1	2.05436	0.0162858
ENSNFUG00015015678	NFKBIAB	2.1134	0.00200739	1.31903	0.533509	0.794369	0.309205
PPTC7A	NA	2.12298	0.0400659	0.756732	1	1.36625	0.166631
ENSNFUG00015004149	PSME4	2.12905	0.0407935	1.82796	0.438479	0.301086	0.785173
ENSNFUG00015017865	NFKBIAA	2.16493	0.0123693	0.78449	1	1.38044	0.123828
ENSNFUG00015003599	IER2	2.22883	0.0227463	-0.895522	1	3.12435	0.000955972
ENSNFUG00015007377	SMOX	2.25531	0.0306882	0.639456	1	1.61586	0.118258
SLC6A6	NA	2.25832	0.00162803	1.5825	0.259925	0.675818	0.429131
ANXA2B	NA	2.37874	5.2014e-06	0.566665	1	1.81208	0.00153821
ENSNFUG00015022671	IGF1	2.45782	5.24263e-08	1.59645	0.00928853	0.861372	0.0900295
ENSNFUG00015008226	SLC25A29	2.53344	0.0240595	2.05335	0.416328	0.480091	0.715516
ASB5A	NA	2.5379	0.0344142	2.02542	0.557602	0.512471	0.651523
HMOX1	NA	2.57901	0.0187327	1.74195	0.704447	0.837065	0.503647
BHMT	NA	2.6301	1.17222e-14	1.71696	8.21173e-06	0.913144	0.0390435
ENSNFUG00015005973	CDKN1A	2.66098	0.00068185	-0.786834	1	3.44781	4.76255e-06
ENSNFUG00015011190	GOT1	2.72126	5.97864e-05	1.41331	0.47004	1.30795	0.103319
ENSNFUG00015024644	SPRY4	2.72198	0.000879566	1.75842	0.376116	0.963557	0.247053
CTH1	NA	2.72278	0.000405316	0.892669	1	1.83011	0.0244344
ENSNFUG00015023018	TCN2L	2.78358	4.21569e-06	2.30407	0.00101581	0.479509	0.556392
ENSNFUG00015002524	AASDHPPT	2.79991	4.83347e-06	1.63517	0.149426	1.16474	0.0613534
ENSNFUG00015024685	CBS	2.8656	6.66248e-07	2.85887	1.39484e-06	0.00672702	0.993057
ENSNFUG00015008007	LECT2	2.88368	3.86784e-05	1.5924	0.315837	1.29128	0.130398
BIN2A	NA	2.90853	0.00199964	1.218	1	1.69052	0.0658667
ENSNFUG00015010074	CALCA	2.91189	8.75952e-06	0.924725	1	1.98717	0.00921068
ENSNFUG00015016467	CEBPD	2.95528	6.86503e-06	-0.187618	1	3.14289	1.53826e-06
ENSNFUG00015008045	HSD3B2	3.00718	0.00933149	1.06185	1	1.94533	0.0716463
ENSNFUG00015006508	NBL1	3.02746	0.0140772	2.42814	0.340667	0.599316	0.611699
ZGC:162608	NA	3.05175	0.000184465	1.60545	0.559976	1.4463	0.131121
OGFRL1	NA	3.10971	0.00679796	3.11063	0.0268676	-0.000913787	0.99908
ENSNFUG00015003177	CD74B	3.16676	0.0257044	2.63487	0.391535	0.531893	0.710774
ENSNFUG00015014696	C1QA	3.16914	0.019691	2.44459	0.491214	0.724548	0.553134
UCP1	NA	3.20308	2.30587e-06	1.10849	0.944397	2.09458	0.00868422
GLS2	NA	3.22454	0.0282401	1.66361	1	1.56093	0.280827
RIPK2	NA	3.31298	0.00156292	0.761859	1	2.55112	0.018676
WDR70	NA	3.43717	1.03979e-06	1.50646	0.578545	1.93071	0.0112596
ENSNFUG00015023788	GADD45BA	3.46493	0.000134218	-1.07854	1	4.54347	2.60833e-07
ENSNFUG00015002804	SLC6A16	3.50289	0.0236814	2.79229	0.46926	0.710602	0.610305
MAN1A2	NA	3.53072	0.000459559	1.32717	1	2.20355	0.0297698
ENSNFUG00015017418	Nfu_g_1_001221	3.58686	0.000286613	2.25909	0.295477	1.32777	0.171767
VANGL2	NA	3.72532	0.000548613	1.82512	0.889201	1.9002	0.053507
ZGC:153031	NA	3.75692	5.09456e-06	2.60037	0.0281022	1.15655	0.123842
ENSNFUG00015006349	MFAP4	4.56859	2.86296e-13	3.6152	1.01269e-07	0.953388	0.26491
ENSNFUG00015008202	IGFBP1A	4.6714	1.99621e-05	3.75232	0.00534249	0.919083	0.420868
ENSNFUG00015012644	Nfu_g_1_012109	5.04578	4.4613e-14	3.54031	2.42401e-06	1.50547	0.0322922
SLC13A5	NA	5.74239	3.40348e-13	3.18723	0.00327726	2.55516	1.82029e-06
ENSNFUG00015004780	HTRA1B	8.54778	1.08914e-11	5.91928	5.84123e-05	2.6285	3.58532e-05
FGF19	NA	8.86211	4.61404e-09	6.57556	0.000218149	2.28655	0.0081165

## Sheet: S6
Supplementary Table 6: 154 genes with human's orthologs.
Row-names	Symbol	Adult-Young_log2FoldChange	Adult-Young_padj	Old-Young_log2FoldChange	Old-Young_padj	Old-Adult_log2FoldChange	Old-Adult_padj
AKR1D1	NA	-0.654307	1	-2.10892	0.0438653	-1.45461	0.174153
ALDH1L1	NA	0.229519	1	0.988961	0.00291373	0.759442	0.0342643
AMDHD1	NA	0.511988	0.793969	0.700468	0.0475239	0.188481	0.638373
AMDHD2	NA	0.758547	0.90193	1.58711	0.000696755	0.82856	0.111178
APEX1	NA	-0.73292	1	-1.85815	0.0204026	-1.12523	0.199174
ARF1	NA	-0.199571	1	-1.41437	0.0478418	-1.2148	0.0811666
C1R	NA	2.20941	9.81906e-05	1.33565	0.040483	-0.873763	0.180359
C9	NA	1.83184	0.000513972	1.23599	0.0297826	-0.595852	0.325377
CCNI	NA	0.267218	1	0.981256	0.0438104	0.714038	0.13989
CYB5R2	NA	-1.40763	0.553335	-2.73111	0.000620238	-1.32349	0.171767
DHCR7	NA	-1.23045	0.926598	-2.5603	0.00199983	-1.32986	0.16643
ENSNFUG00015000421	MMD	-0.648611	1	-2.22375	0.0326373	-1.57513	0.146804
ENSNFUG00015001702	NAP1L1	-0.140898	1	1.4278	0.0102086	1.5687	0.00445936
ENSNFUG00015001750	MTP	0.82466	1	-2.80305	0.0174621	-3.62771	0.000949805
ENSNFUG00015001955	CRELD2	-1.3043	0.220063	-1.49938	0.0232058	-0.195072	0.826771
ENSNFUG00015002316	SCARA3	0.530306	0.868961	1.02265	0.00179157	0.492346	0.190269
ENSNFUG00015002448	FTL	-0.420152	1	1.56022	0.000561371	1.98037	2.72316e-06
ENSNFUG00015002524	AASDHPPT	1.63517	0.149426	2.79991	4.83347e-06	1.16474	0.0613534
ENSNFUG00015004753	NARS1	-0.377846	1	-2.24524	0.0380125	-1.8674	0.0811666
ENSNFUG00015004974	TTC36	0.173069	1	1.09168	0.045137	0.918607	0.0842301
ENSNFUG00015006067	MANF	-0.169827	1	-2.21477	0.0203382	-2.04494	0.0322262
ENSNFUG00015006235	SDF2	-0.497122	1	-2.13891	0.0407935	-1.64179	0.120237
ENSNFUG00015007377	SMOX	0.639456	1	2.25531	0.0306882	1.61586	0.118258
ENSNFUG00015007629	SC5DL	-0.71338	1	-1.8411	0.0385093	-1.12772	0.225731
ENSNFUG00015008007	LECT2	1.5924	0.315837	2.88368	3.86784e-05	1.29128	0.130398
ENSNFUG00015009220	ubiquitin-conjugating enzyme E2 E1	0.0803591	1	1.11995	0.00689213	1.03959	0.0174001
ENSNFUG00015009320	CCNG1	0.659983	0.793969	1.00462	0.0206756	0.344637	0.48276
ENSNFUG00015010335	PDIA4	0.0796053	1	-1.93825	0.0395056	-2.01786	0.0266921
ENSNFUG00015010348	HSD17B7	-0.785949	1	-1.71332	0.0310585	-0.927374	0.270982
ENSNFUG00015011190	GOT1	1.41331	0.47004	2.72126	5.97864e-05	1.30795	0.103319
ENSNFUG00015011498	TM7SF2	-0.984604	1	-1.83173	0.0438104	-0.847124	0.391631
ENSNFUG00015011984	ACADVL	0.0902879	1	-1.93942	0.0339965	-2.0297	0.0232308
ENSNFUG00015013006	PNPLA3	1.76386	0.0339322	1.79753	0.00660472	0.0336629	0.970029
ENSNFUG00015013216	ALDOB	0.595448	0.352374	1.23371	2.30587e-06	0.63826	0.0413818
ENSNFUG00015013479	PDIA3	-0.363008	1	-1.03684	0.0232775	-0.673831	0.158727
ENSNFUG00015013677	RBP4	-0.758426	0.168387	-1.0833	0.000683559	-0.324877	0.415027
ENSNFUG00015013919	HYOU1	-0.397071	1	-2.8271	0.000553172	-2.43003	0.00769324
ENSNFUG00015013978	HSPA9	0.0403769	1	-1.68816	0.0310585	-1.72853	0.0244344
ENSNFUG00015014886	RNF2	0.278823	1	1.71154	0.00509637	1.43272	0.0269479
ENSNFUG00015015062	AAMDC	0.181319	1	1.01221	0.0160094	0.830889	0.0502602
ENSNFUG00015015122	CS	0.174887	1	-1.69662	0.0354554	-1.8715	0.0169952
ENSNFUG00015016467	CEBPD	-0.187618	1	2.95528	6.86503e-06	3.14289	1.53826e-06
ENSNFUG00015016614	LAPTM4A	0.540859	1	0.970226	0.0217384	0.429366	0.345556
ENSNFUG00015017546	MIOX	0.547428	0.90193	0.851301	0.0330322	0.303873	0.493259
ENSNFUG00015017609	TMED7	-0.269734	1	-1.99294	0.0114783	-1.72321	0.0328806
ENSNFUG00015017752	HSP90B1	-0.272138	1	-2.29034	0.0030331	-2.0182	0.0166246
ENSNFUG00015017777	HGD	0.898323	0.095084	1.1443	0.00136872	0.245981	0.59271
ENSNFUG00015017855	NSA2	0.426516	1	0.83887	0.00683561	0.412354	0.233887
ENSNFUG00015017956	EDEM1	0.592873	1	-2.79898	0.0205072	-3.39185	0.00321927
ENSNFUG00015018200	EBP	-1.06336	1	-2.66321	0.00145554	-1.59986	0.0909883
ENSNFUG00015018861	THEM6	0.140977	1	1.47733	0.0355767	1.33635	0.0504001
ENSNFUG00015019477	TMEM268 transmembrane protein 268	0.565071	1	1.85727	0.0168719	1.2922	0.0940631
ENSNFUG00015019934	PMVK	-1.8644	0.00680909	-2.02482	0.000553172	-0.160421	0.859562
ENSNFUG00015021074	DHCR24	-0.20204	1	-2.93292	0.0297826	-2.73088	0.0386236
ENSNFUG00015021355	COMTD1	0.432137	0.902451	0.979908	0.000313818	0.547772	0.0790823
ENSNFUG00015022051	PTS	-0.13062	1	1.54908	0.012512	1.6797	0.00708716
ENSNFUG00015022523	IDI1	-0.609414	1	-2.18292	0.00337321	-1.5735	0.0520408
ENSNFUG00015022530	FAM210B	0.0182164	1	1.1697	0.0154303	1.15148	0.0197528
ENSNFUG00015022671	IGF1	1.59645	0.00928853	2.45782	5.24263e-08	0.861372	0.0900295
ENSNFUG00015022907	GCHFR	0.920165	0.942027	1.72751	0.00689213	0.807346	0.264159
ENSNFUG00015023018	TCN2L	2.30407	0.00101581	2.78358	4.21569e-06	0.479509	0.556392
ENSNFUG00015023561	TOR3A	-0.282998	1	-1.56852	0.0131203	-1.28552	0.0477215
ENSNFUG00015023562	HSD11B1L	0.318697	1	-1.18117	0.0243296	-1.49987	0.00234995
ENSNFUG00015023887	CD9B	1.07464	0.24507	1.51685	0.00164692	0.442211	0.444645
ENSNFUG00015024029	ETV5	1.48525	0.0881401	1.84476	0.00164692	0.359516	0.611152
ENSNFUG00015024123	GLDC	0.816008	1	1.5398	0.0287413	0.723789	0.325377
ENSNFUG00015024148	OAT	2.9282	0.000373963	2.04985	0.0197253	-0.878348	0.352815
ENSNFUG00015024340	hdhd5	-0.156632	1	-1.67461	0.0165788	-1.51798	0.0322922
ENSNFUG00015024644	SPRY4	1.75842	0.376116	2.72198	0.000879566	0.963557	0.247053
ENSNFUG00015024685	CBS	2.85887	1.39484e-06	2.8656	6.66248e-07	0.00672702	0.993057
ERG28	NA	-1.22774	0.88031	-2.36603	0.00226924	-1.13829	0.208915
F5	NA	0.781452	0.99278	1.42537	0.0139236	0.643922	0.310015
FADS2	NA	-0.884134	1	-1.98505	0.00608715	-1.10092	0.171615
FAM20A	NA	0.736013	1	1.25655	0.0395056	0.520541	0.412656
FOXA3	NA	0.114669	1	1.28702	0.00479857	1.17236	0.0160943
GDA	NA	-0.402978	1	1.57083	0.0319539	1.97381	0.00445936
GLRX	NA	-2.12857	0.00133187	-1.87599	0.00239997	0.252584	0.76837
GSTZ1	NA	0.377154	1	0.880546	0.0395056	0.503392	0.254668
HAL	NA	0.576502	0.704447	0.832014	0.0225415	0.255512	0.536816
HOGA1	NA	0.734704	0.378891	0.892102	0.0240169	0.157399	0.744712
HSP90AB1	NA	0.207099	1	0.764245	0.0407935	0.557146	0.139237
KMO	NA	0.467531	0.987955	0.814355	0.0198885	0.346825	0.361544
MCM5	NA	-0.0728866	1	-2.55077	0.0164204	-2.47789	0.021286
NFIX	NA	0.306404	1	1.32448	0.000743439	1.01807	0.0198393
PDIA6	NA	-0.619624	1	-1.94689	0.00239997	-1.32727	0.0610578
PRDX1	NA	-2.12159	0.21415	-2.47962	0.0154672	-0.358028	0.788133
RDH12	NA	-0.417501	1	-2.51196	0.000553172	-2.09446	0.0099962
SEC61B	NA	-0.844658	0.704447	-1.53831	0.00230053	-0.693652	0.250634
SELENOM	NA	-1.76616	0.0698178	-2.36047	0.00163798	-0.594315	0.561087
SERPINC1	NA	0.473597	0.704447	0.80806	0.00343959	0.334463	0.299329
SERPING1	NA	1.04221	0.0126304	0.872865	0.0232058	-0.169349	0.718658
SLC22A2	NA	-0.610816	1	-2.37021	2.27775e-05	-1.75939	0.00771922
SQSTM1	NA	-0.332236	1	1.93471	0.00660472	2.26695	0.00138898
STEAP4	NA	1.26302	0.0536087	1.72462	0.000156059	0.461605	0.416203
SUOX	NA	1.82672	0.167929	1.96082	0.0237271	0.134096	0.893264
TAFAZZIN	NA	0.0212028	1	-2.49148	0.0114783	-2.51269	0.0126952
TMEM86B	NA	-0.742134	1	-2.80408	6.3378e-06	-2.06195	0.00445936
TPST1	NA	0.874896	0.889201	1.28199	0.0417332	0.407091	0.540189
TYMP	NA	0.46112	1	1.01683	0.0406019	0.555708	0.271719
ZBTB20	NA	-0.0609928	1	1.52432	0.0385093	1.58532	0.0269479
ACSL1A	NA	-1.54349	1	-3.70704	0.0206756	-2.16354	0.221884
ALG6	NA	-0.129596	1	-3.13148	0.0412344	-3.00188	0.0433607
ANGPTL4	NA	-1.4214	1	-4.01964	0.00142752	-2.59824	0.0662607
CALR	NA	-1.17182	0.90193	-3.30316	0.0002396	-2.13134	0.0413818
COL1A1B	NA	-1.72786	1	-4.28776	0.002102	-2.55991	0.109427
CYP51	NA	-0.730574	1	-3.28723	0.000122628	-2.55666	0.00830058
ENSNFUG00015001578	HMGCS1	-0.798058	1	-5.1998	0.0021466	-4.40174	0.018706
ENSNFUG00015002052	NSDHL ENSNFUG00015002052	-1.27919	1	-5.18024	4.08551e-06	-3.90105	0.00227341
ENSNFUG00015002804	SLC6A16	2.79229	0.46926	3.50289	0.0236814	0.710602	0.610305
ENSNFUG00015003177	CD74B	2.63487	0.391535	3.16676	0.0257044	0.531893	0.710774
ENSNFUG00015003910	FDFT1 ENSNFUG00015003910	-0.61029	1	-4.09678	5.97864e-05	-3.48649	0.00175786
ENSNFUG00015006349	MFAP4	3.6152	1.01269e-07	4.56859	2.86296e-13	0.953388	0.26491
ENSNFUG00015006508	NBL1	2.42814	0.340667	3.02746	0.0140772	0.599316	0.611699
ENSNFUG00015006808	GLTPD1	-1.55238	0.90193	-3.13647	0.0140641	-1.58409	0.273549
ENSNFUG00015008045	HSD3B2	1.06185	1	3.00718	0.00933149	1.94533	0.0716463
ENSNFUG00015008202	IGFBP1A	3.75232	0.00534249	4.6714	1.99621e-05	0.919083	0.420868
ENSNFUG00015009576	MCM3	-0.153048	1	-3.34906	0.0115591	-3.19601	0.0198269
ENSNFUG00015014696	C1QA	2.44459	0.491214	3.16914	0.019691	0.724548	0.553134
ENSNFUG00015017130	YKT6	0.0140585	1	-3.35734	0.00660472	-3.37139	0.00865043
ENSNFUG00015017425	AMD1	-0.869995	1	-3.36624	0.0116629	-2.49625	0.0749319
ENSNFUG00015022132	FDPS	-2.80957	0.847216	-6.79455	0.000179061	-3.98498	0.0561896
ENSNFUG00015024212	COL1A2	-2.03552	0.665617	-4.2174	0.00129368	-2.18188	0.157928
GADL1	NA	-1.2542	0.347717	-3.15351	6.04615e-08	-1.89931	0.00866963
GCK	NA	-4.77736	0.415876	-10.71	6.42227e-05	-5.93265	0.0585211
GLS2	NA	1.66361	1	3.22454	0.0282401	1.56093	0.280827
IFRD2	NA	-0.368132	1	-3.71515	0.0147662	-3.34702	0.0310135
INHBC	NA	-2.71863	0.393486	-6.88939	0.000351396	-4.17076	0.0649617
LSS	NA	-1.23167	1	-3.07221	0.002102	-1.84054	0.105144
MAN1A2	NA	1.32717	1	3.53072	0.000459559	2.20355	0.0297698
MCM6	NA	-0.0272563	1	-3.70989	0.0114783	-3.68264	0.0149841
MSMO1	NA	-0.80407	1	-3.04506	0.000511286	-2.24099	0.0237184
MVDA	NA	-1.31069	1	-4.42897	0.000377719	-3.11828	0.0273576
OGFRL1	NA	3.11063	0.0268676	3.10971	0.00679796	-0.000913787	0.99908
PFKFB4B	NA	-2.06495	0.00375487	-3.54927	2.33477e-09	-1.48432	0.053507
PONZR2	NA	-4.00051	0.111753	-6.59842	0.00112397	-2.59791	0.33572
RIPK2	NA	0.761859	1	3.31298	0.00156292	2.55112	0.018676
SQLEA	NA	-0.769994	1	-4.63809	3.22803e-05	-3.8681	0.00169329
VANGL2	NA	1.82512	0.889201	3.72532	0.000548613	1.9002	0.053507
WDR70	NA	1.50646	0.578545	3.43717	1.03979e-06	1.93071	0.0112596
AACS	NA	0.183315	1	-4.06786	0.00183867	-4.25118	0.00157017
ACLY	NA	0.113539	1	-3.32994	0.0310585	-3.44348	0.0232726
CCDC57（fasn）	NA	0.403007	1	-3.63175	0.0114783	-4.03476	0.00445936
ENSNFUG00015004780	HTRA1B	5.91928	5.84123e-05	8.54778	1.08914e-11	2.6285	3.58532e-05
ENSNFUG00015017418	C-reactive protein	2.25909	0.295477	3.58686	0.000286613	1.32777	0.171767
ENSNFUG00015023788	GADD45BA	-1.07854	1	3.46493	0.000134218	4.54347	2.60833e-07
FGF19	NA	6.57556	0.000218149	8.86211	4.61404e-09	2.28655	0.0081165
SLC13A5	NA	3.18723	0.00327726	5.74239	3.40348e-13	2.55516	1.82029e-06
UCP1	NA	1.10849	0.944397	3.20308	2.30587e-06	2.09458	0.00868422
ENSNFUG00015005973	CDKN1A	-0.786834	1	2.66098	0.00068185	3.44781	4.76255e-06
ENSNFUG00015014638	pcna	-0.265194	1	-2.477	0.0409341	-2.21181	0.0604738
ENSNFUG00015024069	ACACA	0.0873359	1	-1.9462	0.044372	-2.03353	0.0289622
FAH	NA	1.00016	0.00225303	1.80899	3.5327e-13	0.808832	0.0117058
HMOX1	NA	1.74195	0.704447	2.57901	0.0187327	0.837065	0.503647
BHMT	NA	1.71696	8.21173e-06	2.6301	1.17222e-14	0.913144	0.0390435

## Sheet: S7
Supplementary Table 7: 53 genes whose expression changes were confirmed by qPCR.
Gene	Full Name
AKR1D1	Aldo-keto reductase family 1 member D1
SC5DL	Sterol-C5-desaturase
LECT2	Leukocyte cell-derived chemotaxin 2
HSD17B7	17-β-hydroxysteroid dehydrogenase type 7
PNPLA3	Patatin-like phospholipase domain-containing protein 3
RBP4	Retinol-binding protein 4
RNF2	Ring finger protein 2
MIOX	Myo-inositol oxygenase
TMEM268	Transmembrane protein 268
COMTD1	Catechol-O-methyltransferase domain-containing protein 1
IGF1	Insulin-like growth factor 1
TCN2	Transcobalamin II
HSD11B1L	Hydroxysteroid 11-beta dehydrogenase 1-like
OAT	Ornithine aminotransferase
SPRY4	Sprouty RTK signaling antagonist 4
FAM20A	Family with sequence similarity 20 member A
FOXA3	Forkhead box A3
GDA	Guanine deaminase
GLRX	Glutaredoxin
MCM5	Minichromosome maintenance complex component 5
NFIX	Nuclear factor I X-type
SLC22A2	Solute carrier family 22 member 2 (OCT2)
SQSTM1	Sequestosome 1 (p62)
STEAP4	STEAP family member 4
ZBTB20	Zinc finger and BTB domain-containing protein 20
BHMT	Betaine—homocysteine S-methyltransferase
CDKN1A (p21)	Cyclin-dependent kinase inhibitor 1A
ANGPTL4	Angiopoietin-like 4
CD74	CD74 molecule (HLA class II histocompatibility antigen γ chain)
C1QA	Complement C1q A chain
CRP	C-reactive protein
RIPK2	Receptor-interacting serine/threonine-protein kinase 2
SLC6A16	Solute carrier family 6 member 16
HSD3B2	3β-hydroxysteroid dehydrogenase type II
GADL1	Glutamate decarboxylase-like 1
GLS2	Glutaminase 2
FGF19	Fibroblast growth factor 19
SLC13A5	Solute carrier family 13 member 5
UCP1	Uncoupling protein 1
NBL1	Neuroblastoma suppressor of tumorigenicity 1
MCM3	Minichromosome maintenance complex component 3
CDCA7A	Cell division cycle-associated protein 7A
INHBC	Inhibin subunit beta C
OGFRL1	Opioid growth factor receptor-like 1
PONZR2	Plac8 onzin-related protein 2
WDR70	WD repeat-containing protein 70
COL1A1B	Collagen type I alpha 1B
MFAP4	Microfibril-associated protein 4
COL1A2	Collagen type I alpha 2
HTRA1	HtrA serine peptidase 1
AASDHPPT	Aminoadipate-Semialdehyde Dehydrogenase Phosphopantetheinyl Transferase
SELENOM	Selenoprotein M
TMEM86B	Transmembrane Protein 86B

## Sheet: S8
Supplementary Table 8: Gene list which was used for Venn diagram analysis derived from RNA-seq related to Supplementary Fig.3a.
Young vs Adult (RNA seq)	Adult vs Old (RNA seq)
SI:DKEY-183N20.15	OLA.16268
ZGC:174895	CTRL
RPS9	CPB1
LEG1.1	CTRC
GLRX	CEL.1
PFKFB4B	ENDOU
PMVK	PRSS1
SCDB	TMED6
PLIN2	CPA1
TM4SF4	PGLYRP6
AGXTA	CELA1
FAH	PDIA2
SERPING1	ELA2
FN1B	PLA2G1B
F2	CDCA7A
ENO1A	VMO1B
GLUD1B	CEL
C4B	Nfu_g_1_006847
HPDA	APODA.2
SLC22A6L	OLA.3677
C8B	ELA3L
CHIA.4	CTRB.3
IGF1	DNASE1
ITIH1	ATP13A
BHMT	LEG1.1
BX572630.2	HMGCS1
PNPLA3	GATM
C9	AACS
AMY2AL2	CCDC57
ITIH3B.2	NSDHL
MAN2B1	SQLEA
TFR1A	PODXL
XBP1	MCM6
C1R	SLC1A5
CYP1A	MTP
NME4	FDFT1
MAT1A	ACTA2
TCN2L	ACLY
ZGC:153031	EDEM1
SLC25A48	YKT6
INSIG1	IFRD2
CBS	NNT
OAT	MCM2
OGFRL1	AGPS
CD74A	TM9SF3
SLC13A5	MCM3
Nfu_g_1_012109	MVDA
MFAP4	AP1B1
IGFBP1A	GNE
Nfu_g_1_006847	ALG2
DNASE1	ALG6
PLA2G1B	UGP2
CTRC	DEC1B
APODA.2	PAM
ENDOU	ATAD1B
OLA.16268	STX5A
VMO1B	STBD1
ELA3L	DHCR24
CTRB.3	SAR1B
ELA2	M6PR
OLA.3677	TXNDC11
PRSS1	SRP68
TMED6	CORO1C
CELA1	COPB1
CTRL	CRY2A
PDIA2	CYP51
CPA1	OGDH
CPB1	TAFAZZIN
CEL	ANGPTL3
HTRA1B	MCM5
CEL.1	CCZ1
FGF19	GANAB
INS	CP
GCGB	HYOU1
	CU929036.1
	DGAT2
	TEX261
	ACO2
	TXNRD1
	Nfu_g_1_007336
	CABZ01076275.1
	THOP1
	SLC4A1A
	RPA2
	SMPD1
	FAM134C
	ENPP6
	MSMO1
	TOMM70A
	AQP9
	SLC27A2A
	FURINA
	XBP1
	PXDC1B
	CALR
	TBXAS1
	H6PD
	RER1
	RDH12
	CYP1A
	SLC40A1
	TMEM86B
	EIF4G2B
	MANF
	ACACA
	ACADVL
	HSP90B1
	PDIA4
	GYS1
	MOGAT3B
	HADHAB
	IGFBP4
	LPL
	TPRA1
	SURF4
	LHPP
	SCAMP4
	ASMTL
	GADL1
	ACOX1
	CS
	COPA
	TMEM214
	ITIH1
	ADKA
	UBA1
	NDRG1A
	APOBB.1
	SLC51A
	CLTCA
	TRAM1
	SLC22A2
	ITIH2
	VCP
	SELENOW2B
	RPN2
	HSPA9
	TMED7
	ACTR1B
	RPN1
	ENTPD1
	SLC1A4
	SLC16A10
	STT3B
	IDE
	INSIG1
	CDO1
	CYP46A1
	CNP
	PRKAG1
	PTH3R
	CECR5
	SLC25A1B
	HSD11B1L
	BX572630.2
	NPM1A
	COPS4
	MTHFD1A
	ITM1
	ACO1
	PYGL
	QSOX1
	TOR3A
	DPYDB
	SUCLG1
	SLC22A6L
	PRKCSH
	NDUFC2
	PGM1
	TKTB
	Nfu_g_1_016545
	SLC20A1B
	PLG
	A1CF
	MRS2
	LIPCA
	Nfu_g_1_011771
	Nfu_g_1_007730
	ALDOB
	PMT
	EIF1B
	ALDH1L1
	EIF3EA
	AGXTA
	FAH
	PSMB3
	BHMT
	Nfu_g_1_006955
	TM4SF5
	KRT94
	PARK7
	PPDPFB
	MOCS2
	RPL18A
	NFIX
	ENSNFUG00015001123
	EIF3S6IP
	OLA.21581
	TPM4A
	BX004812.1
	PFDN6
	ATP6V1D
	RPL18
	SELENOK
	FABP3
	ATG16L2
	TRAPPC2L
	COA5
	RPL3
	TMEM179B
	FAM210B
	BLOC1S5
	RBP1A
	RSL24D1
	FOXA3
	HSPA8
	RPL7
	MCL1B
	RPS6
	MRTO4
	EIF3C
	UFC1
	CHCHD1
	EIF3F
	LAMTOR5
	ATPV0E1
	RPL10A
	EIF3M
	COX7A3
	EIF3K
	METAP2B
	GSTM3
	PPT2
	RPS27.1
	NFIL3-6
	TTC19
	RPL10
	TPT1
	RPSA
	RPS17
	CABZ01072585.1
	RPS16
	PPIFA
	LSM8
	RPL7A
	RNF2
	BX248510.1
	EIF4A1
	DDX21
	Nfu_g_1_013648
	MED19A
	EIF4A2
	COPS8
	ATF4B2
	AK2
	Nfu_g_1_012109
	RPL13A
	MEAF6
	RPL21
	VEGFAB
	RPS23
	BTF3
	CHST10
	RHBDD1
	RPS12
	COX5B2
	NAP1L1
	RPL8
	ZBTB20
	PNP4B
	RPS24
	ANXA5B
	RPL17
	LRRC8E
	GULP1
	RPS8A
	NAA20
	TRAPPC1
	Nfu_g_1_003080
	RPS7
	PTS
	NACA
	GNG5
	RPS14
	FNDC3BA
	RPS11
	EEF2
	EEF1B2
	RPL6
	RPL35A
	EEF1G
	LAMTOR4
	ANXA2B
	CR382327.1
	RPS4X
	GABPA
	CTH1
	RPS27A
	RPL23
	GRID2IPA
	RPL27A
	RPLP2
	RPS13
	WDR70
	Nfu_g_1_019081
	GDA
	SLC30A6
	FTL
	RPL9
	RPL5
	CALCA
	ILF3B
	PTPA
	RPL11
	HBEGFA
	RPS25
	NR1D2A
	CWC25
	UCP1
	SNRNP70
	PPP6C
	RPL23A
	PNN
	RPS3
	MEIS1B
	RPS3A
	RPL13
	MAN1A2
	IER2B
	RPL15
	SQSTM1
	FGF19
	RPL36A
	RACK1
	GNPDA2
	TENT4B
	RPS10
	ATP1B3A
	ZMYND8
	RIPK2
	SLC13A5
	RPLP0
	BRD2A
	RNASE_MRP
	MYCBP
	HTRA1B
	ANKRD11
	ANGPT1
	CEBPB
	FOXO3B
	TSC1B
	SGK1
	C8ORF4
	KANK4
	GNB3B
	IER2
	RPS9
	CEBPD
	CCRN4L
	CDKN1A
	OLA.26122
	THAP4
	SLC25A25A
	U3
	GADD45BA
	SNORD15

## Sheet: S9
Supplementary Table 9: Genes belonging to each part of the Venn diagram related to Supplementary Fig.4a
A=32	B=33	C=314	D=6	E=3	F=16	G=28
AMY2AL2	AGXTA	A1CF	GLRX	BHMT	CDCA7A	AASDHPPT
C1R	APODA.2	AACS	IGF1	FGF19	FOXA3	AKR1D1
C4B	BX572630.2	ACACA	MFAP4	SLC13A5	GADL1	ANGPTL4
C8B	CEL	ACADVL	OAT		GDA	C1QA
C9	CEL.1	ACLY	OGFRL1		HSD11B1L	CD74
CBS	CELA1	ACO1	PNPLA3		MCM3	CDKN1A (p21)
CD74A	CPA1	ACO2			MCM5	COL1A1B
CHIA.4	CPB1	ACOX1			NFIX	COL1A2
ENO1A	CTRB.3	ACTA2			RIPK2	COMTD1
F2	CTRC	ACTR1B			RNF2	CRP
FN1B	CTRL	ADKA			SLC22A2	FAM20A
GCGB	CYP1A	AGPS			SQSTM1	GLS2
GLUD1B	DNASE1	AK2			TMEM86B	HSD17B7
HPDA	ELA2	ALDH1L1			UCP1	HSD3B2
IGFBP1A	ELA3L	ALDOB			WDR70	HTRA1
INS	ENDOU	ALG2			ZBTB20	INHBC
ITIH3B.2	FAH	ALG6				LECT2
MAN2B1	HTRA1B	ANGPT1				MIOX
MAT1A	INSIG1	ANGPTL3				NBL1
NME4	ITIH1	ANKRD11				PONZR2
PFKFB4B	LEG1.1	ANXA2B				RBP4
PLIN2	Nfu_g_1_006847	ANXA5B				SC5DL
PMVK	Nfu_g_1_012109	AP1B1				SELENOM
SCDB	OLA.16268	APOBB.1				SLC6A16
SERPING1	OLA.3677	AQP9				SPRY4
SI:DKEY-183N20.15	PDIA2	ASMTL				STEAP4
SLC25A48	PLA2G1B	ATAD1B				TCN2
TCN2L	PRSS1	ATF4B2				TMEM268
TFR1A	RPS9	ATG16L2
TM4SF4	SLC22A6L	ATP13A
ZGC:153031	TMED6	ATP1B3A
ZGC:174895	VMO1B	ATP6V1D
	XBP1	ATPV0E1
		BLOC1S5
		BRD2A
		BTF3
		BX004812.1
		BX248510.1
		C8ORF4
		CABZ01072585.1
		CABZ01076275.1
		CALCA
		CALR
		CCDC57
		CCRN4L
		CCZ1
		CDKN1A
		CDO1
		CEBPB
		CEBPD
		CECR5
		CHCHD1
		CHST10
		CLTCA
		CNP
		COA5
		COPA
		COPB1
		COPS4
		COPS8
		CORO1C
		COX5B2
		COX7A3
		CP
		CR382327.1
		CRY2A
		CS
		CTH1
		CU929036.1
		CWC25
		CYP46A1
		CYP51
		DDX21
		DEC1B
		DGAT2
		DHCR24
		DPYDB
		EDEM1
		EEF1B2
		EEF1G
		EEF2
		EIF1B
		EIF3C
		EIF3EA
		EIF3F
		EIF3K
		EIF3M
		EIF3S6IP
		EIF4A1
		EIF4A2
		EIF4G2B
		ENPP6
		ENSNFUG00015001123
		ENTPD1
		FABP3
		FAM134C
		FAM210B
		FDFT1
		FNDC3BA
		FOXO3B
		FTL
		FURINA
		GABPA
		GADD45BA
		GANAB
		GATM
		GNB3B
		GNE
		GNG5
		GNPDA2
		GRID2IPA
		GSTM3
		GULP1
		GYS1
		H6PD
		HADHAB
		HBEGFA
		HMGCS1
		HSP90B1
		HSPA8
		HSPA9
		HYOU1
		IDE
		IER2
		IER2B
		IFRD2
		IGFBP4
		ILF3B
		ITIH2
		ITM1
		KANK4
		KRT94
		LAMTOR4
		LAMTOR5
		LHPP
		LIPCA
		LPL
		LRRC8E
		LSM8
		M6PR
		MAN1A2
		MANF
		MCL1B
		MCM2
		MCM6
		MEAF6
		MED19A
		MEIS1B
		METAP2B
		MOCS2
		MOGAT3B
		MRS2
		MRTO4
		MSMO1
		MTHFD1A
		MTP
		MVDA
		MYCBP
		NAA20
		NACA
		NAP1L1
		NDRG1A
		NDUFC2
		NFIL3-6
		NNT
		NPM1A
		NR1D2A
		NSDHL
		Nfu_g_1_003080
		Nfu_g_1_006955
		Nfu_g_1_007336
		Nfu_g_1_007730
		Nfu_g_1_011771
		Nfu_g_1_013648
		Nfu_g_1_016545
		Nfu_g_1_019081
		OGDH
		OLA.21581
		OLA.26122
		PAM
		PARK7
		PDIA4
		PFDN6
		PGLYRP6
		PGM1
		PLG
		PMT
		PNN
		PNP4B
		PODXL
		PPDPFB
		PPIFA
		PPP6C
		PPT2
		PRKAG1
		PRKCSH
		PSMB3
		PTH3R
		PTPA
		PTS
		PXDC1B
		PYGL
		QSOX1
		RACK1
		RBP1A
		RDH12
		RER1
		RHBDD1
		RNASE_MRP
		RPA2
		RPL10
		RPL10A
		RPL11
		RPL13
		RPL13A
		RPL15
		RPL17
		RPL18
		RPL18A
		RPL21
		RPL23
		RPL23A
		RPL27A
		RPL3
		RPL35A
		RPL36A
		RPL5
		RPL6
		RPL7
		RPL7A
		RPL8
		RPL9
		RPLP0
		RPLP2
		RPN1
		RPN2
		RPS10
		RPS11
		RPS12
		RPS13
		RPS14
		RPS16
		RPS17
		RPS23
		RPS24
		RPS25
		RPS27.1
		RPS27A
		RPS3
		RPS3A
		RPS4X
		RPS6
		RPS7
		RPS8A
		RPSA
		RSL24D1
		SAR1B
		SCAMP4
		SELENOK
		SELENOW2B
		SGK1
		SLC16A10
		SLC1A4
		SLC1A5
		SLC20A1B
		SLC25A1B
		SLC25A25A
		SLC27A2A
		SLC30A6
		SLC40A1
		SLC4A1A
		SLC51A
		SMPD1
		SNORD15
		SNRNP70
		SQLEA
		SRP68
		STBD1
		STT3B
		STX5A
		SUCLG1
		SURF4
		TAFAZZIN
		TBXAS1
		TENT4B
		TEX261
		THAP4
		THOP1
		TKTB
		TM4SF5
		TM9SF3
		TMED7
		TMEM179B
		TMEM214
		TOMM70A
		TOR3A
		TPM4A
		TPRA1
		TPT1
		TRAM1
		TRAPPC1
		TRAPPC2L
		TSC1B
		TTC19
		TXNDC11
		TXNRD1
		U3
		UBA1
		UFC1
		UGP2
[truncated: 4 more rows]
